# Supplementary material
Source: ML conference proceedings conference paper supplement (https://proceedings.neurips.cc/paper_files/paper/2022/hash/47e288629a6996a17ce50b90a056a0e1-Abstract.html)
Supplement: Supplementary file 1 [file 47e288629a6996a17ce50b90a056a0e1-Supplemental-Conference.zip]

Archive with 206 entries (183 files):
- RMT_supp/
- RMT_supp/Recurrent_Memory_Transformer__NeurIPS_2022___Appendix_.pdf
- RMT_supp/.DS_Store
- RMT_supp/readme.txt
- RMT_supp/results_csv/
- RMT_supp/results_csv/results_wt103_enwik8.csv
- RMT_supp/results_csv/results_wt103_enwik8_all_parameters.csv
- RMT_supp/results_csv/short_synthetic+MT.csv
- RMT_supp/results_csv/long_copy_reverse.csv
- RMT_supp/visualization_notebooks/
- RMT_supp/visualization_notebooks/visualize_synthetic.ipynb
- RMT_supp/visualization_notebooks/attn-maps.ipynb
- RMT_supp/visualization_notebooks/plot_graphs_lm.ipynb
- RMT_supp/visualization_notebooks/interpret_synthetic.ipynb
- RMT_supp/attention_maps/
- RMT_supp/attention_maps/reverse_tl24xl24.pdf
- RMT_supp/attention_maps/copy_tl24xl24.pdf
- RMT_supp/attention_maps/copy_tl8xl8.pdf
- RMT_supp/attention_maps/reverse_tl12mt6.pdf
- RMT_supp/attention_maps/reverse_tl12xl6.pdf
- RMT_supp/attention_maps/copy_tl24mt24.pdf
- RMT_supp/attention_maps/reverse_tl24mt24.pdf
- RMT_supp/attention_maps/reverse_tl24mt24_v2.pdf
- RMT_supp/attention_maps/copy_tl8mt8.pdf
- RMT_supp/attention_maps/reverse_tl8mt8.pdf
- RMT_supp/transformer-xl-memory_experiments/
- RMT_supp/transformer-xl-memory_experiments/debug.ipynb
- RMT_supp/transformer-xl-memory_experiments/tests.ipynb
- RMT_supp/transformer-xl-memory_experiments/prep_text8.py
- RMT_supp/transformer-xl-memory_experiments/LICENSE
- RMT_supp/transformer-xl-memory_experiments/run_copy.ipynb
- RMT_supp/transformer-xl-memory_experiments/interpretation/
- RMT_supp/transformer-xl-memory_experiments/interpretation/visualize_synthetic.ipynb
- RMT_supp/transformer-xl-memory_experiments/interpretation/attn-maps.ipynb
- RMT_supp/transformer-xl-memory_experiments/interpretation/plot_graphs_lm.ipynb
- RMT_supp/transformer-xl-memory_experiments/interpretation/parse_test.py
- RMT_supp/transformer-xl-memory_experiments/interpretation/logs_to_tb.py
- RMT_supp/transformer-xl-memory_experiments/interpretation/interpret_synthetic.ipynb
- RMT_supp/transformer-xl-memory_experiments/logs_to_tb.py
- RMT_supp/transformer-xl-memory_experiments/README.md
- RMT_supp/transformer-xl-memory_experiments/interpret_logs.ipynb
- RMT_supp/transformer-xl-memory_experiments/.ipynb_checkpoints/
- RMT_supp/transformer-xl-memory_experiments/.ipynb_checkpoints/debug copy-0531cd62-7956-4da9-a684-3c1c38da0603-checkpoint.ipynb
- RMT_supp/transformer-xl-memory_experiments/.ipynb_checkpoints/debug copy-fdb03275-9e14-4094-bfb8-4ed54a7bb3ab-checkpoint.ipynb
- RMT_supp/transformer-xl-memory_experiments/.ipynb_checkpoints/run_copy-66138041-19d1-4a63-958c-ef05c26d8e24-checkpoint.ipynb
- RMT_supp/transformer-xl-memory_experiments/.ipynb_checkpoints/default-ecd89d05-2bde-4f66-9e52-da930b426985-checkpoint.ipynb
- RMT_supp/transformer-xl-memory_experiments/pytorch/
- RMT_supp/transformer-xl-memory_experiments/pytorch/run_enwik8_large.sh
- RMT_supp/transformer-xl-memory_experiments/pytorch/run_retrieval.sh
- RMT_supp/transformer-xl-memory_experiments/pytorch/train_synthetic.py
- RMT_supp/transformer-xl-memory_experiments/pytorch/.DS_Store
- RMT_supp/transformer-xl-memory_experiments/pytorch/run_copy_slide.sh
- RMT_supp/transformer-xl-memory_experiments/pytorch/mem_transformer_slide.py
- RMT_supp/transformer-xl-memory_experiments/pytorch/run_copy.sh
- RMT_supp/transformer-xl-memory_experiments/pytorch/mem_transformer.py
- RMT_supp/transformer-xl-memory_experiments/pytorch/run_text8_large.sh
- RMT_supp/transformer-xl-memory_experiments/pytorch/run_wt103_base.sh
- RMT_supp/transformer-xl-memory_experiments/pytorch/train_synthetic_slide.py
- RMT_supp/transformer-xl-memory_experiments/pytorch/utils/
- RMT_supp/transformer-xl-memory_experiments/pytorch/utils/adaptive_softmax.py
- RMT_supp/transformer-xl-memory_experiments/pytorch/utils/data_parallel.py
- RMT_supp/transformer-xl-memory_experiments/pytorch/utils/proj_adaptive_softmax.py
- RMT_supp/transformer-xl-memory_experiments/pytorch/utils/log_uniform_sampler.py
- RMT_supp/transformer-xl-memory_experiments/pytorch/utils/exp_utils.py
- RMT_supp/transformer-xl-memory_experiments/pytorch/utils/vocabulary.py
- RMT_supp/transformer-xl-memory_experiments/pytorch/README.md
- RMT_supp/transformer-xl-memory_experiments/pytorch/run_lm1b_large.sh
- RMT_supp/transformer-xl-memory_experiments/pytorch/run_lm1b_base.sh
- RMT_supp/transformer-xl-memory_experiments/pytorch/data_utils.py
- RMT_supp/transformer-xl-memory_experiments/pytorch/train.py
- RMT_supp/transformer-xl-memory_experiments/pytorch/eval.py
- RMT_supp/transformer-xl-memory_experiments/pytorch/run_enwik8_base.sh
- RMT_supp/transformer-xl-memory_experiments/pytorch/run_reverse.sh
- RMT_supp/transformer-xl-memory_experiments/pytorch/run_wt103_large.sh
- RMT_supp/transformer-xl-memory_experiments/pytorch/run_text8_base.sh
- RMT_supp/transformer-xl-memory_experiments/pytorch/experiment_utils/
- RMT_supp/transformer-xl-memory_experiments/pytorch/experiment_utils/generate_data.py
- RMT_supp/transformer-xl-memory_experiments/pytorch/experiment_utils/retrieval.py
- RMT_supp/transformer-xl-memory_experiments/pytorch/experiment_utils/run_experiment.py
- RMT_supp/transformer-xl-memory_experiments/tf/
- RMT_supp/transformer-xl-memory_experiments/tf/avg_checkpoints.py
- RMT_supp/transformer-xl-memory_experiments/tf/train_gpu.py
- RMT_supp/transformer-xl-memory_experiments/tf/model.py
- RMT_supp/transformer-xl-memory_experiments/tf/README.md
- RMT_supp/transformer-xl-memory_experiments/tf/data_utils.py
- RMT_supp/transformer-xl-memory_experiments/tf/sota/
- RMT_supp/transformer-xl-memory_experiments/tf/sota/text8.sh
- RMT_supp/transformer-xl-memory_experiments/tf/sota/lm1b.sh
- RMT_supp/transformer-xl-memory_experiments/tf/sota/wt103.sh
- RMT_supp/transformer-xl-memory_experiments/tf/sota/download.sh
- RMT_supp/transformer-xl-memory_experiments/tf/sota/enwik8.sh
- RMT_supp/transformer-xl-memory_experiments/tf/scripts/
- RMT_supp/transformer-xl-memory_experiments/tf/scripts/enwik8_base_gpu.sh
- RMT_supp/transformer-xl-memory_experiments/tf/scripts/lm1b_large_tpu.sh
- RMT_supp/transformer-xl-memory_experiments/tf/scripts/text8_base_gpu.sh
- RMT_supp/transformer-xl-memory_experiments/tf/scripts/enwik8_large_tpu.sh
- RMT_supp/transformer-xl-memory_experiments/tf/scripts/wt103_base_gpu.sh
- RMT_supp/transformer-xl-memory_experiments/tf/scripts/wt103_large_tpu.sh
- RMT_supp/transformer-xl-memory_experiments/tf/scripts/lm1b_base_gpu.sh
- RMT_supp/transformer-xl-memory_experiments/tf/scripts/text8_large_tpu.sh
- RMT_supp/transformer-xl-memory_experiments/tf/train.py
- RMT_supp/transformer-xl-memory_experiments/tf/gpu_utils.py
- RMT_supp/transformer-xl-memory_experiments/tf/vocabulary.py
- RMT_supp/transformer-xl-memory_experiments/tf/tpu_estimator.py
- RMT_supp/transformer-xl-memory_experiments/getdata.sh
- RMT_supp/transformer-xl-maths/
- RMT_supp/transformer-xl-maths/debug.ipynb
- RMT_supp/transformer-xl-maths/tests.ipynb
- RMT_supp/transformer-xl-maths/prep_text8.py
- RMT_supp/transformer-xl-maths/LICENSE
- RMT_supp/transformer-xl-maths/run_copy.ipynb
- RMT_supp/transformer-xl-maths/interpretation/
- RMT_supp/transformer-xl-maths/interpretation/visualize_synthetic.ipynb
- RMT_supp/transformer-xl-maths/interpretation/attn-maps.ipynb
- RMT_supp/transformer-xl-maths/interpretation/plot_graphs_lm.ipynb
- RMT_supp/transformer-xl-maths/interpretation/parse_test.py
- RMT_supp/transformer-xl-maths/interpretation/logs_to_tb.py
- RMT_supp/transformer-xl-maths/interpretation/logs_to_csv.py
- RMT_supp/transformer-xl-maths/interpretation/interpret_synthetic.ipynb
- RMT_supp/transformer-xl-maths/logs_to_tb.py
- RMT_supp/transformer-xl-maths/maths.ipynb
- RMT_supp/transformer-xl-maths/README.md
- RMT_supp/transformer-xl-maths/interpret_logs.ipynb
- RMT_supp/transformer-xl-maths/.ipynb_checkpoints/
- RMT_supp/transformer-xl-maths/.ipynb_checkpoints/debug copy-0531cd62-7956-4da9-a684-3c1c38da0603-checkpoint.ipynb
- RMT_supp/transformer-xl-maths/.ipynb_checkpoints/debug copy-fdb03275-9e14-4094-bfb8-4ed54a7bb3ab-checkpoint.ipynb
- RMT_supp/transformer-xl-maths/.ipynb_checkpoints/run_copy-66138041-19d1-4a63-958c-ef05c26d8e24-checkpoint.ipynb
- RMT_supp/transformer-xl-maths/.ipynb_checkpoints/default-ecd89d05-2bde-4f66-9e52-da930b426985-checkpoint.ipynb
- RMT_supp/transformer-xl-maths/pytorch/
- RMT_supp/transformer-xl-maths/pytorch/run_enwik8_large.sh
- RMT_supp/transformer-xl-maths/pytorch/run_copy1k.sh
- RMT_supp/transformer-xl-maths/pytorch/run_linsys.sh
- RMT_supp/transformer-xl-maths/pytorch/iterate_copy.py
- RMT_supp/transformer-xl-maths/pytorch/run_sqeq_d.sh
- RMT_supp/transformer-xl-maths/pytorch/run_retrieval.sh
- RMT_supp/transformer-xl-maths/pytorch/train_synthetic.py
- RMT_supp/transformer-xl-maths/pytorch/.DS_Store
- RMT_supp/transformer-xl-maths/pytorch/train_sqeq.py
- RMT_supp/transformer-xl-maths/pytorch/train_linsys.py
- RMT_supp/transformer-xl-maths/pytorch/mem_transformer_slide.py
- RMT_supp/transformer-xl-maths/pytorch/run_copy.sh
- RMT_supp/transformer-xl-maths/pytorch/train_listops.py
- RMT_supp/transformer-xl-maths/pytorch/run_sqeq_cd.sh
- RMT_supp/transformer-xl-maths/pytorch/run_sqeq.sh
- RMT_supp/transformer-xl-maths/pytorch/mem_transformer.py
- RMT_supp/transformer-xl-maths/pytorch/run_text8_large.sh
- RMT_supp/transformer-xl-maths/pytorch/run_wt103_base.sh
- RMT_supp/transformer-xl-maths/pytorch/train_synthetic_slide.py
- RMT_supp/transformer-xl-maths/pytorch/train_synthetic_memop.py
- RMT_supp/transformer-xl-maths/pytorch/run_listops6k.sh
- RMT_supp/transformer-xl-maths/pytorch/eval_sqeq_slide.py
- RMT_supp/transformer-xl-maths/pytorch/utils/
- RMT_supp/transformer-xl-maths/pytorch/utils/adaptive_softmax.py
- RMT_supp/transformer-xl-maths/pytorch/utils/data_parallel.py
- RMT_supp/transformer-xl-maths/pytorch/utils/proj_adaptive_softmax.py
- RMT_supp/transformer-xl-maths/pytorch/utils/log_uniform_sampler.py
- RMT_supp/transformer-xl-maths/pytorch/utils/exp_utils.py
- RMT_supp/transformer-xl-maths/pytorch/utils/vocabulary.py
- RMT_supp/transformer-xl-maths/pytorch/README.md
- RMT_supp/transformer-xl-maths/pytorch/run_lm1b_large.sh
- RMT_supp/transformer-xl-maths/pytorch/run_lm1b_base.sh
- RMT_supp/transformer-xl-maths/pytorch/run_reverse120.sh
- RMT_supp/transformer-xl-maths/pytorch/data_utils.py
- RMT_supp/transformer-xl-maths/pytorch/train.py
- RMT_supp/transformer-xl-maths/pytorch/run_copy120.sh
- RMT_supp/transformer-xl-maths/pytorch/eval_sqeq.py
- RMT_supp/transformer-xl-maths/pytorch/eval.py
- RMT_supp/transformer-xl-maths/pytorch/run_enwik8_base.sh
- RMT_supp/transformer-xl-maths/pytorch/run_reverse.sh
- RMT_supp/transformer-xl-maths/pytorch/run_sqeq_slide.sh
- RMT_supp/transformer-xl-maths/pytorch/run_wt103_large.sh
- RMT_supp/transformer-xl-maths/pytorch/run_text8_base.sh
- RMT_supp/transformer-xl-maths/pytorch/experiment_utils/
- RMT_supp/transformer-xl-maths/pytorch/experiment_utils/generate_data.py
- RMT_supp/transformer-xl-maths/pytorch/experiment_utils/retrieval.py
- RMT_supp/transformer-xl-maths/pytorch/experiment_utils/run_experiment.py
- RMT_supp/transformer-xl-maths/pytorch/train_sqeq_slide.py
- RMT_supp/transformer-xl-maths/tf/
- RMT_supp/transformer-xl-maths/tf/avg_checkpoints.py
- RMT_supp/transformer-xl-maths/tf/train_gpu.py
- RMT_supp/transformer-xl-maths/tf/model.py
- RMT_supp/transformer-xl-maths/tf/README.md
- RMT_supp/transformer-xl-maths/tf/data_utils.py
- RMT_supp/transformer-xl-maths/tf/sota/
- RMT_supp/transformer-xl-maths/tf/sota/text8.sh
- RMT_supp/transformer-xl-maths/tf/sota/lm1b.sh
- RMT_supp/transformer-xl-maths/tf/sota/wt103.sh
- RMT_supp/transformer-xl-maths/tf/sota/download.sh
- RMT_supp/transformer-xl-maths/tf/sota/enwik8.sh
- RMT_supp/transformer-xl-maths/tf/scripts/
- RMT_supp/transformer-xl-maths/tf/scripts/enwik8_base_gpu.sh
- RMT_supp/transformer-xl-maths/tf/scripts/lm1b_large_tpu.sh
- RMT_supp/transformer-xl-maths/tf/scripts/text8_base_gpu.sh
- RMT_supp/transformer-xl-maths/tf/scripts/enwik8_large_tpu.sh
- RMT_supp/transformer-xl-maths/tf/scripts/wt103_base_gpu.sh
- RMT_supp/transformer-xl-maths/tf/scripts/wt103_large_tpu.sh
- RMT_supp/transformer-xl-maths/tf/scripts/lm1b_base_gpu.sh
- RMT_supp/transformer-xl-maths/tf/scripts/text8_large_tpu.sh
- RMT_supp/transformer-xl-maths/tf/train.py
- RMT_supp/transformer-xl-maths/tf/gpu_utils.py
- RMT_supp/transformer-xl-maths/tf/vocabulary.py
- RMT_supp/transformer-xl-maths/tf/tpu_estimator.py
- RMT_supp/transformer-xl-maths/getdata.sh
- RMT_supp/data_generation/
- RMT_supp/data_generation/square_equations.ipynb
- RMT_supp/data_generation/algorithmic.ipynb
