# Supplementary material
Source: ML conference proceedings conference paper supplement (https://proceedings.neurips.cc/paper_files/paper/2022/hash/47e288629a6996a17ce50b90a056a0e1-Abstract.html)
Supplement: Supplementary file 1 [file 47e288629a6996a17ce50b90a056a0e1-Supplemental-Conference.zip › RMT_supp/results_csv/long_copy_reverse.csv]

dataset	n_layer	n_head	d_head	d_embed	d_model	d_inner	dropout	dropatt	init	emb_init	init_range	emb_init_range	init_std	proj_init_std	optim	lr	mom	scheduler	warmup_step	decay_rate	lr_min	clip	clip_nonemb	max_step	batch_size	batch_chunk	tgt_len	eval_tgt_len	ext_len	mem_len	num_mem_tokens	not_tied	seed	cuda	adaptive	div_val	pre_lnorm	varlen	multi_gpu	log_interval	eval_interval	restart	restart_dir	debug	same_length	attn_type	clamp_len	eta_min	gpu0_bsz
copy120	4	4	64	128	128	256	0.1	0	normal	normal	0.1	0.01	0.02	0.01	adam	0.0001	0	dev_perf	0	0.5	0.00001	0.25	False	200000	256	1	60	60	0	30	0	False	2211	True	False	1	False	False	True	8000	40000	False		False	False	0	-1	0	-1
copy120	4	4	64	128	128	256	0.1	0	normal	normal	0.1	0.01	0.02	0.01	adam	0.0001	0	dev_perf	0	0.5	0.00001	0.25	False	200000	256	1	60	60	0	30	0	False	2212	True	False	1	False	False	True	8000	40000	False		False	False	0	-1	0	-1
copy120	4	4	64	128	128	256	0.1	0	normal	normal	0.1	0.01	0.02	0.01	adam	0.0001	0	dev_perf	0	0.5	0.00001	0.25	False	600000	128	1	40	40	0	40	0	False	7111	True	False	1	False	False	True	8000	80000	False		False	False	0	-1	0	-1
copy120	4	4	64	128	128	256	0.1	0	normal	normal	0.1	0.01	0.02	0.01	adam	0.0001	0	dev_perf	0	0.5	0.00001	0.25	False	600000	128	1	40	40	0	40	0	False	1111	True	False	1	False	False	True	8000	80000	False		False	False	0	-1	0	-1
copy120	4	4	64	128	128	256	0.1	0	normal	normal	0.1	0.01	0.02	0.01	adam	0.0001	0	dev_perf	0	0.5	0.00001	0.25	False	600000	128	1	40	40	0	40	0	False	4111	True	False	1	False	False	True	8000	80000	False		False	False	0	-1	0	-1
copy120	4	4	64	128	128	256	0.1	0	normal	normal	0.1	0.01	0.02	0.01	adam	0.0001	0	dev_perf	0	0.5	0.00001	0.25	False	200000	128	1	120	120	0	0	60	False	1111	True	False	1	False	False	True	8000	40000	False		False	False	0	-1	0	-1
copy120	4	4	64	128	128	256	0.1	0	normal	normal	0.1	0.01	0.02	0.01	adam	0.0001	0	dev_perf	0	0.5	0.00001	0.25	False	400000	128	1	60	60	0	0	30	False	1111	True	False	1	False	False	True	8000	40000	False		False	False	0	-1	0	-1
copy120	4	4	64	128	128	256	0.1	0	normal	normal	0.1	0.01	0.02	0.01	adam	0.0001	0	dev_perf	0	0.5	0.00001	0.25	False	100000	256	1	120	120	0	60	0	False	1111	True	False	1	False	False	True	8000	40000	False		False	False	0	-1	0	-1
copy120	4	4	64	128	128	256	0.1	0	normal	normal	0.1	0.01	0.02	0.01	adam	0.0001	0	dev_perf	0	0.5	0.00001	0.25	False	100000	256	1	120	120	0	60	0	False	1412	True	False	1	False	False	True	8000	40000	False		False	False	0	-1	0	-1
copy120	4	4	64	128	128	256	0.1	0	normal	normal	0.1	0.01	0.02	0.01	adam	0.0001	0	dev_perf	0	0.5	0.00001	0.25	False	600000	128	1	40	40	0	0	40	False	1311	True	False	1	False	False	True	8000	80000	False		False	False	0	-1	0	-1
copy120	4	4	64	128	128	256	0.1	0	normal	normal	0.1	0.01	0.02	0.01	adam	0.0001	0	dev_perf	0	0.5	0.00001	0.25	False	600000	128	1	40	40	0	0	40	False	1111	True	False	1	False	False	True	8000	80000	False		False	False	0	-1	0	-1
copy120	6	4	64	128	128	256	0.1	0	normal	normal	0.1	0.01	0.02	0.01	adam	0.0001	0	dev_perf	0	0.5	0.000001	0.25	False	600000	32	1	360	360	0	0	0	False	1311	True	False	1	False	False	True	4000	80000	False		False	False	0	-1	0	-1
copy120	6	4	64	128	128	256	0.1	0	normal	normal	0.1	0.01	0.02	0.01	adam	0.0001	0	dev_perf	0	0.5	0.000001	0.25	False	600000	32	1	360	360	0	0	0	False	3311	True	False	1	False	False	True	4000	80000	False		False	False	0	-1	0	-1
copy120	4	4	64	128	128	256	0.1	0	normal	normal	0.1	0.01	0.02	0.01	adam	0.0001	0	dev_perf	0	0.5	0.00001	0.25	False	200000	128	1	120	120	0	0	0	False	1111	True	False	1	False	False	True	8000	40000	False		False	False	0	-1	0	-1
copy120	4	4	64	128	128	256	0.1	0	normal	normal	0.1	0.01	0.02	0.01	adam	0.0001	0	dev_perf	0	0.5	0.00001	0.25	False	200000	128	1	120	120	0	0	0	False	1112	True	False	1	False	False	True	8000	40000	False		False	False	0	-1	0	-1
copy120	4	4	64	128	128	256	0.1	0	normal	normal	0.1	0.01	0.02	0.01	adam	0.0001	0	dev_perf	0	0.5	0.00001	0.25	False	200000	128	1	60	60	0	0	0	False	1111	True	False	1	False	False	True	8000	40000	False		False	False	0	-1	0	-1
copy120	4	4	64	128	128	256	0.1	0	normal	normal	0.1	0.01	0.02	0.01	adam	0.0001	0	dev_perf	0	0.5	0.00001	0.25	False	200000	128	1	60	60	0	0	0	False	1112	True	False	1	False	False	True	8000	40000	False		False	False	0	-1	0	-1
copy120	4	4	64	128	128	256	0.1	0	normal	normal	0.1	0.01	0.02	0.01	adam	0.0001	0	dev_perf	0	0.5	0.00001	0.25	False	600000	128	1	40	40	0	0	0	False	1111	True	False	1	False	False	True	8000	40000	False		False	False	0	-1	0	-1
reverse120	4	4	64	128	128	256	0.1	0	normal	normal	0.1	0.01	0.02	0.01	adam	0.0001	0	dev_perf	0	0.5	0.00001	0.25	False	500000	128	1	120	120	0	0	60	False	1114	True	False	1	False	False	True	8000	40000	False		False	False	0	-1	0	-1
reverse120	4	4	64	128	128	256	0.1	0	normal	normal	0.1	0.01	0.02	0.01	adam	0.0001	0	dev_perf	0	0.5	0.00001	0.25	False	300000	128	1	120	120	0	0	60	False	1111	True	False	1	False	False	True	8000	40000	False		False	False	0	-1	0	-1
reverse120	4	4	64	128	128	256	0.1	0	normal	normal	0.1	0.01	0.02	0.01	adam	0.0001	0	dev_perf	0	0.5	0.00001	0.25	False	500000	128	1	120	120	0	0	60	False	1111	True	False	1	False	False	True	8000	80000	False		False	False	0	-1	0	-1
reverse120	4	4	64	128	128	256	0.1	0	normal	normal	0.1	0.01	0.02	0.01	adam	0.0001	0	dev_perf	0	0.5	0.00001	0.25	False	500000	128	1	60	60	0	0	60	False	1111	True	False	1	False	False	True	8000	40000	False		False	False	0	-1	0	-1
reverse120	4	4	64	128	128	256	0.1	0	normal	normal	0.1	0.01	0.02	0.01	adam	0.0001	0	dev_perf	0	0.5	0.00001	0.25	False	500000	128	1	60	60	0	0	60	False	1112	True	False	1	False	False	True	8000	40000	False		False	False	0	-1	0	-1
reverse120	4	4	64	128	128	256	0.1	0	normal	normal	0.1	0.01	0.02	0.01	adam	0.0001	0	dev_perf	0	0.5	0.00001	0.25	False	500000	128	1	60	60	0	60	0	False	1111	True	False	1	False	False	True	8000	40000	False		False	False	0	-1	0	-1
reverse120	4	4	64	128	128	256	0.1	0	normal	normal	0.1	0.01	0.02	0.01	adam	0.0001	0	dev_perf	0	0.5	0.00001	0.25	False	500000	128	1	40	40	0	60	0	False	1112	True	False	1	False	False	True	8000	40000	False		False	False	0	-1	0	-1
reverse120	4	4	64	128	128	256	0.1	0	normal	normal	0.1	0.01	0.02	0.01	adam	0.0001	0	dev_perf	0	0.5	0.00001	0.25	False	500000	128	1	40	40	0	60	0	False	1111	True	False	1	False	False	True	8000	40000	False		False	False	0	-1	0	-1
reverse120	4	4	64	128	128	256	0.1	0	normal	normal	0.1	0.01	0.02	0.01	adam	0.0001	0	dev_perf	0	0.5	0.00001	0.25	False	300000	128	1	120	120	0	60	0	False	1111	True	False	1	False	False	True	8000	40000	False		False	False	0	-1	0	-1
reverse120	4	4	64	128	128	256	0.1	0	normal	normal	0.1	0.01	0.02	0.01	adam	0.0001	0	dev_perf	0	0.5	0.00001	0.25	False	300000	128	1	120	120	0	60	0	False	1113	True	False	1	False	False	True	8000	40000	False		False	False	0	-1	0	-1
reverse120	4	4	64	128	128	256	0.1	0	normal	normal	0.1	0.01	0.02	0.01	adam	0.0001	0	dev_perf	0	0.5	0.00001	0.25	False	300000	128	1	120	120	0	60	0	False	1112	True	False	1	False	False	True	8000	40000	False		False	False	0	-1	0	-1
reverse120	4	4	64	128	128	256	0.1	0	normal	normal	0.1	0.01	0.02	0.01	adam	0.0001	0	dev_perf	0	0.5	0.00001	0.25	False	100000	128	1	240	240	0	0	0	False	1112	True	False	1	False	False	True	8000	40000	False		False	False	0	-1	0	-1
reverse120	4	4	64	128	128	256	0.1	0	normal	normal	0.1	0.01	0.02	0.01	adam	0.0001	0	dev_perf	0	0.5	0.00001	0.25	False	100000	128	1	240	240	0	0	0	False	1111	True	False	1	False	False	True	8000	40000	False		False	False	0	-1	0	-1
reverse120	4	4	64	128	128	256	0.1	0	normal	normal	0.1	0.01	0.02	0.01	adam	0.0001	0	dev_perf	0	0.5	0.00001	0.25	False	300000	128	1	120	120	0	60	0	False	1111	True	False	1	False	False	True	8000	40000	False		False	False	0	-1	0	-1
reverse120	4	4	64	128	128	256	0.1	0	normal	normal	0.1	0.01	0.02	0.01	adam	0.0001	0	dev_perf	0	0.5	0.00001	0.25	False	500000	128	1	60	60	0	60	0	False	1122	True	False	1	False	False	True	8000	40000	False		False	False	0	-1	0	-1
reverse120	4	4	64	128	128	256	0.1	0	normal	normal	0.1	0.01	0.02	0.01	adam	0.0001	0	dev_perf	0	0.5	0.00001	0.25	False	500000	128	1	120	120	0	60	0	False	1112	True	False	1	False	False	True	8000	40000	False		False	False	0	-1	0	-1
reverse120	4	4	64	128	128	256	0.1	0	normal	normal	0.1	0.01	0.02	0.01	adam	0.0001	0	dev_perf	0	0.5	0.00001	0.25	False	500000	128	1	120	120	0	60	0	False	1111	True	False	1	False	False	True	8000	40000	False		False	False	0	-1	0	-1
reverse120	4	4	64	128	128	256	0.1	0	normal	normal	0.1	0.01	0.02	0.01	adam	0.0001	0	dev_perf	0	0.5	0.00001	0.25	False	1000000	128	1	40	40	0	40	0	False	1111	True	False	1	False	False	True	8000	40000	False		False	False	0	-1	0	-1
reverse120	4	4	64	128	128	256	0.1	0	normal	normal	0.1	0.01	0.02	0.01	adam	0.0001	0	dev_perf	0	0.5	0.00001	0.25	False	1000000	128	1	40	40	0	40	0	False	1112	True	False	1	False	False	True	8000	40000	False		False	False	0	-1	0	-1
reverse120	4	4	64	128	128	256	0.1	0	normal	normal	0.1	0.01	0.02	0.01	adam	0.0001	0	dev_perf	0	0.5	0.00001	0.25	False	1000000	128	1	40	40	0	0	60	False	1114	True	False	1	False	False	True	8000	40000	False		False	False	0	-1	0	-1
copy120	4	4	64	128	128	256	0.1	0	normal	normal	0.1	0.01	0.02	0.01	adam	0.0001	0	dev_perf	0	0.5	0.00001	0.25	False	200000	128	1	120	120	0	0	60	False	1111	True	False	1	False	False	True	8000	40000	False		False	False	0	-1	0	-1
copy120	4	4	64	128	128	256	0.1	0	normal	normal	0.1	0.01	0.02	0.01	adam	0.0001	0	dev_perf	0	0.5	0.00001	0.25	False	100000	256	1	120	120	0	60	0	False	1111	True	False	1	False	False	True	8000	40000	False		False	False	0	-1	0	-1
copy120	4	4	64	128	128	256	0.1	0	normal	normal	0.1	0.01	0.02	0.01	adam	0.0001	0	dev_perf	0	0.5	0.00001	0.25	False	100000	256	1	120	120	0	60	0	False	1412	True	False	1	False	False	True	8000	40000	False		False	False	0	-1	0	-1
copy240	4	4	64	128	128	256	0.1	0	normal	normal	0.1	0.01	0.02	0.01	adam	0.0001	0	dev_perf	0	0.5	0.00001	0.25	False	300000	256	1	120	120	0	60	0	False	2212	True	False	1	False	False	True	8000	40000	False		False	False	0	-1	0	-1
copy240	4	4	64	128	128	256	0.1	0	normal	normal	0.1	0.01	0.02	0.01	adam	0.0001	0	dev_perf	0	0.5	0.00001	0.25	False	300000	128	1	120	120	0	60	0	False	1222	True	False	1	False	False	True	8000	40000	False		False	False	0	-1	0	-1
copy240	4	4	64	128	128	256	0.1	0	normal	normal	0.1	0.01	0.02	0.01	adam	0.0001	0	dev_perf	0	0.5	0.00001	0.25	False	300000	256	1	120	120	0	0	60	False	2212	True	False	1	False	False	True	8000	40000	False		False	False	0	-1	0	-1
copy240	4	4	64	128	128	256	0.1	0	normal	normal	0.1	0.01	0.02	0.01	adam	0.0001	0	dev_perf	0	0.5	0.00001	0.25	False	300000	256	1	120	120	0	0	60	False	2222	True	False	1	False	False	True	8000	40000	False		False	False	0	-1	0	-1
copy240	4	4	64	128	128	512	0.1	0	normal	normal	0.1	0.01	0.02	0.01	adam	0.0001	0	dev_perf	0	0.5	0.00001	0.25	False	300000	256	1	120	120	0	0	60	False	1111	True	False	1	False	False	True	8000	40000	False		False	False	0	-1	0	-1
copy240	4	4	64	128	128	512	0.1	0	normal	normal	0.1	0.01	0.02	0.01	adam	0.0001	0	dev_perf	0	0.5	0.00001	0.25	False	300000	256	1	120	120	0	0	60	False	1112	True	False	1	False	False	True	8000	40000	False		False	False	0	-1	0	-1
copy360	4	4	64	128	128	256	0.1	0	normal	normal	0.1	0.01	0.02	0.01	adam	0.0001	0	dev_perf	0	0.5	0.00001	0.25	False	200000	128	1	120	120	0	0	60	False	1112	True	False	1	False	False	True	8000	40000	False		False	False	0	-1	0	-1
copy360	4	4	64	128	128	256	0.1	0	normal	normal	0.1	0.01	0.02	0.01	adam	0.0001	0	dev_perf	0	0.5	0.00001	0.25	False	200000	128	1	120	120	0	60	0	False	1112	True	False	1	False	False	True	8000	40000	False		False	False	0	-1	0	-1
copy120	4	4	64	128	128	256	0.1	0	normal	normal	0.1	0.01	0.02	0.01	adam	0.0001	0	dev_perf	0	0.5	0.00001	0.25	False	200000	128	1	120	120	0	0	0	False	1111	True	False	1	False	False	True	8000	40000	False		False	False	0	-1	0	-1
copy120	4	4	64	128	128	256	0.1	0	normal	normal	0.1	0.01	0.02	0.01	adam	0.0001	0	dev_perf	0	0.5	0.00001	0.25	False	200000	128	1	120	120	0	0	0	False	1112	True	False	1	False	False	True	8000	40000	False		False	False	0	-1	0	-1
[truncated: 23 more columns]
