# Supplementary material
Source: ML conference proceedings conference paper supplement (https://proceedings.neurips.cc/paper_files/paper/2022/hash/47e288629a6996a17ce50b90a056a0e1-Abstract.html)
Supplement: Supplementary file 1 [file 47e288629a6996a17ce50b90a056a0e1-Supplemental-Conference.zip › RMT_supp/results_csv/results_wt103_enwik8.csv]

dataset	eval_tgt_len	tgt_len	mem_backprop_depth	mem_len	num_mem_tokens	mem_at_end	test ppl	test bpc
wt103	50	50	0.0	1	0	False	32.371
wt103	50	50	0.0	1	0	False	32.33
wt103	50	50	0.0	5	0	False	30.015
wt103	50	50	0.0	5	0	False	30.111
wt103	150	150	0.0	0	25	True	29.732
wt103	50	50	0.0	0	10	True	30.686999999999998
wt103	50	50	3.0	0	1	True	28.374000000000002
wt103	50	50	3.0	0	1	True	28.418000000000003
enwik8	128	128	1.0	0	5	True		1.2393
enwik8	128	128	1.0	0	5	True		1.24254
wt103	50	50	2.0	0	1	True	28.438000000000002
enwik8	128	512	0.0	0	256	False		1.3371899999999999
wt103	50	50	2.0	0	5	True	26.959
wt103	50	50	2.0	0	5	True	26.706999999999997
enwik8	128	128	0.0	10	20	True		1.30271
wt103	50	50	1.0	0	1	True	28.73
wt103	50	50	1.0	0	1	True	28.693
wt103	50	50	3.0	0	10	True	26.384
wt103	50	50	3.0	0	10	True	26.366
enwik8	128	512	0.0	512	0	False		1.07134
wt103	150	150	0.0	0	0	False	29.941
wt103	150	150	0.0	0	0	False	29.81
wt103	150	150	0.0	0	0	False	30.11
wt103	50	50	1.0	0	50	True	26.03
wt103	150	150	0.0	0	150	True	27.304000000000002
enwik8	128	128	0.0	20	0	False		1.26105
wt103	150	150	0.0	0	75	False	26.570999999999998
wt103	150	150	0.0	0	75	True	27.043000000000003
enwik8	128	128	0.0	200	0	False		1.1396700000000002
wt103	50	50	4.0	0	10	True	26.238000000000003
wt103	50	50	4.0	0	10	True	26.456
wt103	50	50	4.0	0	10	True	26.070999999999998
wt103	150	150	0.0	0	150	True	26.371
wt103	150	150	0.0	0	150	False	26.866999999999997
wt103	50	50	3.0	0	5	True	26.934
wt103	50	50	3.0	0	5	True	26.565
wt103	150	150	0.0	75	0	False	24.671
wt103	150	150	0.0	75	0	False	24.67
wt103	150	150	0.0	75	0	False	24.693
wt103	50	50	1.0	0	5	True	27.191
wt103	50	50	1.0	0	5	True	26.904
enwik8	128	128	0.0	75	0	False		1.19636
wt103	50	50	0.0	50	0	True	26.535
wt103	50	50	0.0	50	0	False	26.55
enwik8	128	128	2.0	0	5	True		1.2327700000000001
enwik8	128	128	2.0	0	5	True		1.22961
wt103	150	150	3.0	0	10	True	25.12
wt103	150	150	3.0	0	10	True	24.99
wt103	150	150	3.0	0	10	True	25.02
wt103	50	50	0.0	0	5	True	30.453000000000003
wt103	50	50	0.0	0	5	True	30.191999999999997
wt103	50	50	1.0	0	10	True	27.013
wt103	50	50	1.0	0	10	True	28.884
wt103	50	50	0.0	0	0	False	39.063
wt103	50	50	0.0	0	0	False	39.042
wt103	50	50	2.0	0	25	True	27.308000000000003
enwik8	128	128	0.0	0	20	True		1.3013299999999999
wt103	50	50	1.0	0	25	True	26.322
enwik8	128	512	0.0	0	0	False		1.39059
enwik8	128	128	1.0	0	20	True		1.22891
wt103	50	50	0.0	100	0	True	25.659000000000002
wt103	50	50	0.0	100	0	False	25.654
enwik8	128	128	1.0	0	10	True		1.2355
enwik8	128	128	1.0	0	10	True		1.24452
wt103	150	150	2.0	0	10	True	25.822
wt103	150	150	2.0	0	10	True	24.646
wt103	150	150	2.0	0	10	True	25.495
enwik8	128	128	2.0	0	20	True		1.2222600000000001
wt103	150	150	0.0	25	0	False	25.584
wt103	150	150	0.0	25	0	False	25.558000000000003
enwik8	128	128	0.0	40	0	False		1.22948
enwik8	128	128	0.0	40	0	False		1.23065
enwik8	128	128	2.0	0	10	True		1.22815
enwik8	128	128	2.0	0	10	True		1.23079
enwik8	128	128	2.0	0	10	True		1.22394
wt103	150	150	0.0	0	10	True	26.831
wt103	150	150	0.0	0	10	True	26.866999999999997
wt103	150	150	1.0	0	10	True	25.113000000000003
wt103	150	150	1.0	0	10	True	27.45
wt103	150	150	1.0	0	10	True	25.871
wt103	150	150	1.0	0	10	True	25.255
wt103	50	50	0.0	200	0	False	25.136
enwik8	128	128	0.0	100	0	False		1.1779600000000001
wt103	50	50	0.0	0	25	True	29.750999999999998
wt103	150	150	0.0	150	0	False	24.171999999999997
wt103	150	150	0.0	150	0	False	24.070999999999998
wt103	150	150	0.0	150	0	False	24.107
wt103	150	150	1.0	0	25	True	24.912
wt103	150	150	2.0	0	25	True	24.646
wt103	150	150	2.0	0	25	True	25.204
wt103	150	150	2.0	0	25	True	24.698
wt103	50	50	0.0	0	1	True	30.435
wt103	50	50	0.0	0	1	True	32.217
enwik8	128	128	0.0	10	0	False		1.2844
enwik8	128	128	0.0	10	0	False		1.2823
wt103	50	50	4.0	0	5	True	26.662
wt103	50	50	4.0	0	5	True	26.654
wt103	50	50	4.0	0	5	True	26.704
wt103	150	150	0.0	0	150	False	29.62
wt103	50	50	0.0	10	0	False	28.903000000000002
wt103	50	50	0.0	10	0	False	29.06
enwik8	128	128	0.0	0	0	False		1.40393
enwik8	128	128	0.0	0	0	False		1.40069
wt103	50	50	2.0	0	10	True	26.862
wt103	50	50	2.0	0	10	True	26.38
wt103	50	50	0.0	0	50	True	29.748
wt103	50	50	0.0	25	0	False	27.506999999999998
wt103	50	50	0.0	25	0	False	27.631
