# Supplementary material
Source: ML conference proceedings conference paper supplement (https://proceedings.neurips.cc/paper_files/paper/2022/hash/47e288629a6996a17ce50b90a056a0e1-Abstract.html)
Supplement: Supplementary file 1 [file 47e288629a6996a17ce50b90a056a0e1-Supplemental-Conference.zip › RMT_supp/results_csv/results_wt103_enwik8_all_parameters.csv]

adaptive	attn_type	batch_chunk	batch_size	bptt_bp	clamp_len	clip	clip_nonemb	cuda	d_embed	d_head	d_inner	d_model	data	dataset	debug	decay_rate	device_ids	div_val	dropatt	dropout	dynamic_loss_scale	emb_init	emb_init_range	eta_min	eval_interval	eval_tgt_len	ext_len	finetune_v2	finetune_v3	fp16	gpu0_bsz	init	init_range	init_std	log_interval	lr	lr_min	max_eval_steps	max_step	mem_at_end	mem_backprop_depth	mem_len	mom	multi_gpu	n_all_param	n_head	n_layer	n_nonemb_param	n_token
True	0	1	128	0.0	-1	0.25	False	True	410	41	2100	410	../data/wikitext-103	wt103	False	0.5	[2, 3]	1	0.0	0.1	False	normal	0.01	0.0	4000	50	0	False	False	False	64	normal	0.1	0.02	200	0.00025	0.0	-1	200000	False	0.0	1	0.0	True	151107538	10	16	41066400	267735
True	0	1	128	0.0	-1	0.25	False	True	410	41	2100	410	../data/wikitext-103	wt103	False	0.5	[2, 3]	1	0.0	0.1	False	normal	0.01	0.0	4000	50	0	False	False	False	64	normal	0.1	0.02	200	0.00025	0.0	-1	200000	False	0.0	1	0.0	True	151107538	10	16	41066400	267735
True	0	1	128	0.0	-1	0.25	False	True	410	41	2100	410	../data/wikitext-103	wt103	False	0.5	[2, 3]	1	0.0	0.1	False	normal	0.01	0.0	4000	50	0	False	False	False	64	normal	0.1	0.02	200	0.00025	0.0	-1	200000	False	0.0	5	0.0	True	151107538	10	16	41066400	267735
True	0	1	128		-1	0.25	False	True	410	41	2100	410	../data/wikitext-103	wt103	False	0.5	[0, 1]	1	0.0	0.1	False	normal	0.01	0.0	4000	50	0	False	False	False	64	normal	0.1	0.02	200	0.00025	0.0	-1	200000	False	0.0	5	0.0	True	151107538	10	16	41066400	267735
True	0	1	60		-1	0.25	False	True	410	41	2100	410	../data/wikitext-103	wt103	False	0.5	[0, 1]	1	0.0	0.1	False	normal	0.01	0.0	4000	150	0	False	False	False	30	normal	0.1	0.02	200	0.00025	0.0	-1	200000	True	0.0	0	0.0	True	151117788	10	16	41066400	267735
True	0	1	128		-1	0.25	False	True	410	41	2100	410	../data/wikitext-103	wt103	False	0.5	[0, 1]	1	0.0	0.1	False	normal	0.01	0.0	4000	50	0	False	False	False	64	normal	0.1	0.02	200	0.00025	0.0	-1	200000	True	0.0	0	0.0	True	151107538	10	16	41066400	267735
True	0	1	128	False	-1	0.25	False	True	410	41	2100	410	../data/wikitext-103	wt103	False	0.5	[2, 3]	1	0.0	0.1	False	normal	0.01	0.0	4000	50	0	False	False	False	64	normal	0.1	0.02	200	0.00025	0.0	-1	200000	True	3.0	0	0.0	True	151107948	10	16	41066400	267735
True	0	1	128	False	-1	0.25	False	True	410	41	2100	410	../data/wikitext-103	wt103	False	0.5	[4, 5]	1	0.0	0.1	False	normal	0.01	0.0	4000	50	0	False	False	False	64	normal	0.1	0.02	200	0.00025	0.0	-1	200000	True	3.0	0	0.0	True	151107948	10	16	41066400	267735
False	0	1	64	False	-1	0.25	False	True	512	64	2048	512	../data/enwik8/	enwik8	False	0.5	[2, 3]	1	0.0	0.1	False	normal	0.01	0.0	4000	128	0	False	False	False	32	normal	0.1	0.02	200	0.00025	0.0	-1	400000	True	1.0	0	0.0	True	41057996	8	12	40949760	204
False	0	1	64	False	-1	0.25	False	True	512	64	2048	512	../data/enwik8/	enwik8	False	0.5	[2, 3]	1	0.0	0.1	False	normal	0.01	0.0	4000	128	0	False	False	False	32	normal	0.1	0.02	200	0.00025	0.0	-1	400000	True	1.0	0	0.0	True	41057996	8	12	40949760	204
True	0	1	128	False	-1	0.25	False	True	410	41	2100	410	../data/wikitext-103	wt103	False	0.5	[2, 3]	1	0.0	0.1	False	normal	0.01	0.0	4000	50	0	False	False	False	64	normal	0.1	0.02	200	0.00025	0.0	-1	200000	True	2.0	0	0.0	True	151107948	10	16	41066400	267735
False	0	1	22		-1	0.25	False	True	512	64	2048	512	../data/enwik8/	enwik8	False	0.5	[2, 3]	1	0.0	0.1	False	normal	0.01	0.0	4000	128	0	False	False	False	11	normal	0.1	0.02	200	0.00025	0.0	-1	400000	False	0.0	0	0.0	True	41186508	8	12	40949760	204
True	0	1	128	False	-1	0.25	False	True	410	41	2100	410	../data/wikitext-103	wt103	False	0.5	[0, 1]	1	0.0	0.1	False	normal	0.01	0.0	4000	50	0	False	False	False	64	normal	0.1	0.02	200	0.00025	0.0	-1	200000	True	2.0	0	0.0	True	151109588	10	16	41066400	267735
True	0	1	128	False	-1	0.25	False	True	410	41	2100	410	../data/wikitext-103	wt103	False	0.5	[0, 1]	1	0.0	0.1	False	normal	0.01	0.0	4000	50	0	False	False	False	64	normal	0.1	0.02	200	0.00025	0.0	-1	200000	True	2.0	0	0.0	True	151109588	10	16	41066400	267735
False	0	1	64	False	-1	0.25	False	True	512	64	2048	512	../data/enwik8/	enwik8	False	0.5	[2, 3]	1	0.0	0.1	False	normal	0.01	0.0	4000	128	0	False	False	False	32	normal	0.1	0.02	200	0.00025	0.0	-1	400000	True	0.0	10	0.0	True	41065676	8	12	40949760	204
True	0	1	128	False	-1	0.25	False	True	410	41	2100	410	../data/wikitext-103	wt103	False	0.5	[2, 3]	1	0.0	0.1	False	normal	0.01	0.0	4000	50	0	False	False	False	64	normal	0.1	0.02	200	0.00025	0.0	-1	200000	True	1.0	0	0.0	True	151107948	10	16	41066400	267735
True	0	1	128	False	-1	0.25	False	True	410	41	2100	410	../data/wikitext-103	wt103	False	0.5	[2, 3]	1	0.0	0.1	False	normal	0.01	0.0	4000	50	0	False	False	False	64	normal	0.1	0.02	200	0.00025	0.0	-1	200000	True	1.0	0	0.0	True	151107948	10	16	41066400	267735
True	0	1	128	False	-1	0.25	False	True	410	41	2100	410	../data/wikitext-103	wt103	False	0.5	[0, 1]	1	0.0	0.1	False	normal	0.01	0.0	4000	50	0	False	False	False	64	normal	0.1	0.02	200	0.00025	0.0	-1	200000	True	3.0	0	0.0	True	151111638	10	16	41066400	267735
True	0	1	128	False	-1	0.25	False	True	410	41	2100	410	../data/wikitext-103	wt103	False	0.5	[0, 1]	1	0.0	0.1	False	normal	0.01	0.0	4000	50	0	False	False	False	64	normal	0.1	0.02	200	0.00025	0.0	-1	200000	True	3.0	0	0.0	True	151111638	10	16	41066400	267735
False	0	1	22		-1	0.25	False	True	512	64	2048	512	../data/enwik8/	enwik8	False	0.5	[2, 3]	1	0.0	0.1	False	normal	0.01	0.0	4000	128	0	False	False	False	11	normal	0.1	0.02	200	0.00025	0.0	-1	400000	False	0.0	512	0.0	True	41055436	8	12	40949760	204
True	0	1	60		-1	0.25	False	True	410	41	2100	410	../data/wikitext-103	wt103	False	0.5	[0, 1]	1	0.0	0.1	False	normal	0.01	0.0	4000	150	0	False	False	False	30	normal	0.1	0.02	200	0.00025	0.0	-1	200000	False	0.0	0	0.0	True	151107538	10	16	41066400	267735
True	0	1	60		-1	0.25	False	True	410	41	2100	410	../data/wikitext-103	wt103	False	0.5	[0, 1]	1	0.0	0.1	False	normal	0.01	0.0	4000	150	0	False	False	False	30	normal	0.1	0.02	200	0.00025	0.0	-1	200000	False	0.0	0	0.0	True	151107538	10	16	41066400	267735
True	0	1	60		-1	0.25	False	True	410	41	2100	410	../data/wikitext-103	wt103	False	0.5	[0, 1]	1	0.0	0.1	False	normal	0.01	0.0	4000	150	0	False	False	False	30	normal	0.1	0.02	200	0.00025	0.0	-1	200000	False	0.0	0	0.0	True	151107538	10	16	41066400	267735
True	0	1	128	False	-1	0.25	False	True	410	41	2100	410	../data/wikitext-103	wt103	False	0.5	[2, 3]	1	0.0	0.1	False	normal	0.01	0.0	4000	50	0	False	False	False	64	normal	0.1	0.02	200	0.00025	0.0	-1	200000	True	1.0	0	0.0	True	151128038	10	16	41066400	267735
True	0	1	60		-1	0.25	False	True	410	41	2100	410	../data/wikitext-103	wt103	False	0.5	[0, 1, 2, 3]	1	0.0	0.1	False	normal	0.01	0.0	4000	150	0	False	False	False	15	normal	0.1	0.02	200	0.00025	0.0	-1	200000	True	0.0	0	0.0	True	151107538	10	16	41066400	267735
False	0	1	64	False	-1	0.25	False	True	512	64	2048	512	../data/enwik8/	enwik8	False	0.5	[0, 1]	1	0.0	0.1	False	normal	0.01	0.0	4000	128	0	False	False	False	32	normal	0.1	0.02	200	0.00025	0.0	-1	400000	False	0.0	20	0.0	True	41055436	8	12	40949760	204
True	0	1	60		-1	0.25	False	True	410	41	2100	410	../data/wikitext-103	wt103	False	0.5	[0, 1]	1	0.0	0.1	False	normal	0.01	0.0	4000	150	0	False	False	False	30	normal	0.1	0.02	200	0.00025	0.0	-1	200000	False	0.0	0	0.0	True	151138288	10	16	41066400	267735
True	0	1	60		-1	0.25	False	True	410	41	2100	410	../data/wikitext-103	wt103	False	0.5	[0, 1]	1	0.0	0.1	False	normal	0.01	0.0	4000	150	0	False	False	False	30	normal	0.1	0.02	200	0.00025	0.0	-1	200000	True	0.0	0	0.0	True	151107538	10	16	41066400	267735
False	0	1	64	False	-1	0.25	False	True	512	64	2048	512	../data/enwik8/	enwik8	False	0.5	[2, 3]	1	0.0	0.1	False	normal	0.01	0.0	4000	128	0	False	False	False	32	normal	0.1	0.02	200	0.00025	0.0	-1	400000	False	0.0	200	0.0	True	41055436	8	12	40949760	204
True	0	1	128	False	-1	0.25	False	True	410	41	2100	410	../data/wikitext-103	wt103	False	0.5	[2, 3]	1	0.0	0.1	False	normal	0.01	0.0	4000	50	0	False	False	False	64	normal	0.1	0.02	200	0.00025	0.0	-1	200000	True	4.0	0	0.0	True	151111638	10	16	41066400	267735
True	0	1	128	False	-1	0.25	False	True	410	41	2100	410	../data/wikitext-103	wt103	False	0.5	[0, 1]	1	0.0	0.1	False	normal	0.01	0.0	4000	50	0	False	False	False	64	normal	0.1	0.02	200	0.00025	0.0	-1	200000	True	4.0	0	0.0	True	151111638	10	16	41066400	267735
True	0	1	128	False	-1	0.25	False	True	410	41	2100	410	../data/wikitext-103	wt103	False	0.5	[0, 1]	1	0.0	0.1	False	normal	0.01	0.0	4000	50	0	False	False	False	64	normal	0.1	0.02	200	0.00025	0.0	-1	200000	True	4.0	0	0.0	True	151111638	10	16	41066400	267735
True	0	1	60		-1	0.25	False	True	410	41	2100	410	../data/wikitext-103	wt103	False	0.5	[0, 1]	1	0.0	0.1	False	normal	0.01	0.0	4000	150	0	False	False	False	30	normal	0.1	0.02	200	0.00025	0.0	-1	200000	True	0.0	0	0.0	True	151107538	10	16	41066400	267735
True	0	1	60		-1	0.25	False	True	410	41	2100	410	../data/wikitext-103	wt103	False	0.5	[0, 1]	1	0.0	0.1	False	normal	0.01	0.0	4000	150	0	False	False	False	30	normal	0.1	0.02	200	0.00025	0.0	-1	200000	False	0.0	0	0.0	True	151169038	10	16	41066400	267735
True	0	1	128	False	-1	0.25	False	True	410	41	2100	410	../data/wikitext-103	wt103	False	0.5	[0, 1]	1	0.0	0.1	False	normal	0.01	0.0	4000	50	0	False	False	False	64	normal	0.1	0.02	200	0.00025	0.0	-1	200000	True	3.0	0	0.0	True	151109588	10	16	41066400	267735
True	0	1	128	False	-1	0.25	False	True	410	41	2100	410	../data/wikitext-103	wt103	False	0.5	[0, 1]	1	0.0	0.1	False	normal	0.01	0.0	4000	50	0	False	False	False	64	normal	0.1	0.02	200	0.00025	0.0	-1	200000	True	3.0	0	0.0	True	151109588	10	16	41066400	267735
True	0	1	60		-1	0.25	False	True	410	41	2100	410	../data/wikitext-103	wt103	False	0.5	[0, 1]	1	0.0	0.1	False	normal	0.01	0.0	4000	150	0	False	False	False	30	normal	0.1	0.02	200	0.00025	0.0	-1	200000	False	0.0	75	0.0	True	151107538	10	16	41066400	267735
True	0	1	60	False	-1	0.25	False	True	410	41	2100	410	../data/wikitext-103	wt103	False	0.5	[0, 1]	1	0.0	0.1	False	normal	0.01	0.0	4000	150	0	False	False	False	30	normal	0.1	0.02	200	0.00025	0.0	-1	200000	False	0.0	75	0.0	True	151107538	10	16	41066400	267735
True	0	1	60	False	-1	0.25	False	True	410	41	2100	410	../data/wikitext-103	wt103	False	0.5	[0, 1]	1	0.0	0.1	False	normal	0.01	0.0	4000	150	0	False	False	False	30	normal	0.1	0.02	200	0.00025	0.0	-1	200000	False	0.0	75	0.0	True	151107538	10	16	41066400	267735
True	0	1	128	False	-1	0.25	False	True	410	41	2100	410	../data/wikitext-103	wt103	False	0.5	[0, 1]	1	0.0	0.1	False	normal	0.01	0.0	4000	50	0	False	False	False	64	normal	0.1	0.02	200	0.00025	0.0	-1	200000	True	1.0	0	0.0	True	151109588	10	16	41066400	267735
True	0	1	128	False	-1	0.25	False	True	410	41	2100	410	../data/wikitext-103	wt103	False	0.5	[0, 1]	1	0.0	0.1	False	normal	0.01	0.0	4000	50	0	False	False	False	64	normal	0.1	0.02	200	0.00025	0.0	-1	200000	True	1.0	0	0.0	True	151109588	10	16	41066400	267735
False	0	1	64	False	-1	0.25	False	True	512	64	2048	512	../data/enwik8/	enwik8	False	0.5	[0, 1]	1	0.0	0.1	False	normal	0.01	0.0	4000	128	0	False	False	False	32	normal	0.1	0.02	200	0.00025	0.0	-1	400000	False	0.0	75	0.0	True	41055436	8	12	40949760	204
True	0	1	128	False	-1	0.25	False	True	410	41	2100	410	../data/wikitext-103	wt103	False	0.5	[2, 3]	1	0.0	0.1	False	normal	0.01	0.0	4000	50	0	False	False	False	64	normal	0.1	0.02	200	0.00025	0.0	-1	200000	True	0.0	50	0.0	True	151107538	10	16	41066400	267735
True	0	1	128		-1	0.25	False	True	410	41	2100	410	../data/wikitext-103	wt103	False	0.5	[2, 3]	1	0.0	0.1	False	normal	0.01	0.0	4000	50	0	False	False	False	64	normal	0.1	0.02	200	0.00025	0.0	-1	200000	False	0.0	50	0.0	True	151107538	10	16	41066400	267735
False	0	1	64	False	-1	0.25	False	True	512	64	2048	512	../data/enwik8/	enwik8	False	0.5	[0, 1]	1	0.0	0.1	False	normal	0.01	0.0	4000	128	0	False	False	False	32	normal	0.1	0.02	200	0.00025	0.0	-1	400000	True	2.0	0	0.0	True	41057996	8	12	40949760	204
False	0	1	64	False	-1	0.25	False	True	512	64	2048	512	../data/enwik8/	enwik8	False	0.5	[0, 1]	1	0.0	0.1	False	normal	0.01	0.0	4000	128	0	False	False	False	32	normal	0.1	0.02	200	0.00025	0.0	-1	400000	True	2.0	0	0.0	True	41057996	8	12	40949760	204
True	0	1	60	False	-1	0.25	False	True	410	41	2100	410	../data/wikitext-103	wt103	False	0.5	[2, 3]	1	0.0	0.1	False	normal	0.01	0.0	4000	150	0	False	False	False	30	normal	0.1	0.02	200	0.00025	0.0	-1	200000	True	3.0	0	0.0	True	151111638	10	16	41066400	267735
True	0	1	60	False	-1	0.25	False	True	410	41	2100	410	../data/wikitext-103	wt103	False	0.5	[0, 1]	1	0.0	0.1	False	normal	0.01	0.0	4000	150	0	False	False	False	30	normal	0.1	0.02	200	0.00025	0.0	-1	200000	True	3.0	0	0.0	True	151111638	10	16	41066400	267735
True	0	1	60	False	-1	0.25	False	True	410	41	2100	410	../data/wikitext-103	wt103	False	0.5	[2, 3]	1	0.0	0.1	False	normal	0.01	0.0	4000	150	0	False	False	False	30	normal	0.1	0.02	200	0.00025	0.0	-1	200000	True	3.0	0	0.0	True	151111638	10	16	41066400	267735
True	0	1	128		-1	0.25	False	True	410	41	2100	410	../data/wikitext-103	wt103	False	0.5	[2, 3]	1	0.0	0.1	False	normal	0.01	0.0	4000	50	0	False	False	False	64	normal	0.1	0.02	200	0.00025	0.0	-1	200000	True	0.0	0	0.0	True	151107538	10	16	41066400	267735
True	0	1	128	False	-1	0.25	False	True	410	41	2100	410	../data/wikitext-103	wt103	False	0.5	[0, 1, 2, 3]	1	0.0	0.1	False	normal	0.01	0.0	4000	50	0	False	False	False	32	normal	0.1	0.02	200	0.00025	0.0	-1	200000	True	0.0	0	0.0	True	151109588	10	16	41066400	267735
True	0	1	128	False	-1	0.25	False	True	410	41	2100	410	../data/wikitext-103	wt103	False	0.5	[2, 3]	1	0.0	0.1	False	normal	0.01	0.0	4000	50	0	False	False	False	64	normal	0.1	0.02	200	0.00025	0.0	-1	200000	True	1.0	0	0.0	True	151111638	10	16	41066400	267735
True	0	1	128	False	-1	0.25	False	True	410	41	2100	410	../data/wikitext-103	wt103	False	0.5	[2, 3]	1	0.0	0.1	False	normal	0.01	0.0	4000	50	0	False	False	False	64	normal	0.1	0.02	200	0.00025	0.0	-1	200000	True	1.0	0	0.0	True	151111638	10	16	41066400	267735
True	0	1	128	False	-1	0.25	False	True	410	41	2100	410	../data/wikitext-103	wt103	False	0.5	[0, 1]	1	0.0	0.1	False	normal	0.01	0.0	4000	50	0	False	False	False	64	normal	0.1	0.02	200	0.00025	0.0	-1	200000	False	0.0	0	0.0	True	151107538	10	16	41066400	267735
True	0	1	128		-1	0.25	False	True	410	41	2100	410	../data/wikitext-103	wt103	False	0.5	[2, 3]	1	0.0	0.1	False	normal	0.01	0.0	4000	50	0	False	False	False	64	normal	0.1	0.02	200	0.00025	0.0	-1	200000	False	0.0	0	0.0	True	151107538	10	16	41066400	267735
True	0	1	128	False	-1	0.25	False	True	410	41	2100	410	../data/wikitext-103	wt103	False	0.5	[2, 3]	1	0.0	0.1	False	normal	0.01	0.0	4000	50	0	False	False	False	64	normal	0.1	0.02	200	0.00025	0.0	-1	200000	True	2.0	0	0.0	True	151117788	10	16	41066400	267735
False	0	1	64	False	-1	0.25	False	True	512	64	2048	512	../data/enwik8/	enwik8	False	0.5	[0, 1]	1	0.0	0.1	False	normal	0.01	0.0	4000	128	0	False	False	False	32	normal	0.1	0.02	200	0.00025	0.0	-1	400000	True	0.0	0	0.0	True	41065676	8	12	40949760	204
True	0	1	128	False	-1	0.25	False	True	410	41	2100	410	../data/wikitext-103	wt103	False	0.5	[2, 3]	1	0.0	0.1	False	normal	0.01	0.0	4000	50	0	False	False	False	64	normal	0.1	0.02	200	0.00025	0.0	-1	200000	True	1.0	0	0.0	True	151117788	10	16	41066400	267735
False	0	1	22		-1	0.25	False	True	512	64	2048	512	../data/enwik8/	enwik8	False	0.5	[0, 1]	1	0.0	0.1	False	normal	0.01	0.0	4000	128	0	False	False	False	11	normal	0.1	0.02	200	0.00025	0.0	-1	400000	False	0.0	0	0.0	True	41055436	8	12	40949760	204
False	0	1	64	False	-1	0.25	False	True	512	64	2048	512	../data/enwik8/	enwik8	False	0.5	[2, 3]	1	0.0	0.1	False	normal	0.01	0.0	4000	128	0	False	False	False	32	normal	0.1	0.02	200	0.00025	0.0	-1	400000	True	1.0	0	0.0	True	41065676	8	12	40949760	204
True	0	1	128	False	-1	0.25	False	True	410	41	2100	410	../data/wikitext-103	wt103	False	0.5	[2, 3]	1	0.0	0.1	False	normal	0.01	0.0	4000	50	0	False	False	False	64	normal	0.1	0.02	200	0.00025	0.0	-1	200000	True	0.0	100	0.0	True	151107538	10	16	41066400	267735
True	0	1	128	False	-1	0.25	False	True	410	41	2100	410	../data/wikitext-103	wt103	False	0.5	[0, 1]	1	0.0	0.1	False	normal	0.01	0.0	4000	50	0	False	False	False	64	normal	0.1	0.02	200	0.00025	0.0	-1	200000	False	0.0	100	0.0	True	151107538	10	16	41066400	267735
False	0	1	64	False	-1	0.25	False	True	512	64	2048	512	../data/enwik8/	enwik8	False	0.5	[0, 1]	1	0.0	0.1	False	normal	0.01	0.0	4000	128	0	False	False	False	32	normal	0.1	0.02	200	0.00025	0.0	-1	400000	True	1.0	0	0.0	True	41060556	8	12	40949760	204
False	0	1	64	False	-1	0.25	False	True	512	64	2048	512	../data/enwik8/	enwik8	False	0.5	[2, 3]	1	0.0	0.1	False	normal	0.01	0.0	4000	128	0	False	False	False	32	normal	0.1	0.02	200	0.00025	0.0	-1	400000	True	1.0	0	0.0	True	41060556	8	12	40949760	204
True	0	1	60	False	-1	0.25	False	True	410	41	2100	410	../data/wikitext-103	wt103	False	0.5	[2, 3]	1	0.0	0.1	False	normal	0.01	0.0	4000	150	0	False	False	False	30	normal	0.1	0.02	200	0.00025	0.0	-1	200000	True	2.0	0	0.0	True	151111638	10	16	41066400	267735
True	0	1	60	False	-1	0.25	False	True	410	41	2100	410	../data/wikitext-103	wt103	False	0.5	[0, 1]	1	0.0	0.1	False	normal	0.01	0.0	4000	150	0	False	False	False	30	normal	0.1	0.02	200	0.00025	0.0	-1	200000	True	2.0	0	0.0	True	151111638	10	16	41066400	267735
True	0	1	60	False	-1	0.25	False	True	410	41	2100	410	../data/wikitext-103	wt103	False	0.5	[2, 3]	1	0.0	0.1	False	normal	0.01	0.0	4000	150	0	False	False	False	30	normal	0.1	0.02	200	0.00025	0.0	-1	200000	True	2.0	0	0.0	True	151111638	10	16	41066400	267735
False	0	1	64	False	-1	0.25	False	True	512	64	2048	512	../data/enwik8/	enwik8	False	0.5	[2, 3]	1	0.0	0.1	False	normal	0.01	0.0	4000	128	0	False	False	False	32	normal	0.1	0.02	200	0.00025	0.0	-1	400000	True	2.0	0	0.0	True	41065676	8	12	40949760	204
True	0	1	60	False	-1	0.25	False	True	410	41	2100	410	../data/wikitext-103	wt103	False	0.5	[0, 1, 2, 3]	1	0.0	0.1	False	normal	0.01	0.0	4000	150	0	False	False	False	12	normal	0.1	0.02	200	0.00025	0.0	-1	200000	False	0.0	25	0.0	True	151107538	10	16	41066400	267735
True	0	1	60	False	-1	0.25	False	True	410	41	2100	410	../data/wikitext-103	wt103	False	0.5	[0, 1]	1	0.0	0.1	False	normal	0.01	0.0	4000	150	0	False	False	False	30	normal	0.1	0.02	200	0.00025	0.0	-1	200000	False	0.0	25	0.0	True	151107538	10	16	41066400	267735
False	0	1	64	False	-1	0.25	False	True	512	64	2048	512	../data/enwik8/	enwik8	False	0.5	[4, 5]	1	0.0	0.1	False	normal	0.01	0.0	4000	128	0	False	False	False	32	normal	0.1	0.02	200	0.00025	0.0	-1	400000	False	0.0	40	0.0	True	41055436	8	12	40949760	204
False	0	1	64	False	-1	0.25	False	True	512	64	2048	512	../data/enwik8/	enwik8	False	0.5	[0, 1]	1	0.0	0.1	False	normal	0.01	0.0	4000	128	0	False	False	False	32	normal	0.1	0.02	200	0.00025	0.0	-1	400000	False	0.0	40	0.0	True	41055436	8	12	40949760	204
False	0	1	64	False	-1	0.25	False	True	512	64	2048	512	../data/enwik8/	enwik8	False	0.5	[0, 1]	1	0.0	0.1	False	normal	0.01	0.0	4000	128	0	False	False	False	32	normal	0.1	0.02	200	0.00025	0.0	-1	400000	True	2.0	0	0.0	True	41060556	8	12	40949760	204
False	0	1	64	False	-1	0.25	False	True	512	64	2048	512	../data/enwik8/	enwik8	False	0.5	[6, 7]	1	0.0	0.1	False	normal	0.01	0.0	4000	128	0	False	False	False	32	normal	0.1	0.02	200	0.00025	0.0	-1	400000	True	2.0	0	0.0	True	41060556	8	12	40949760	204
False	0	1	64	False	-1	0.25	False	True	512	64	2048	512	../data/enwik8/	enwik8	False	0.5	[0, 1]	1	0.0	0.1	False	normal	0.01	0.0	4000	128	0	False	False	False	32	normal	0.1	0.02	200	0.00025	0.0	-1	400000	True	2.0	0	0.0	True	41060556	8	12	40949760	204
True	0	1	60	False	-1	0.25	False	True	410	41	2100	410	../data/wikitext-103	wt103	False	0.5	[0, 1]	1	0.0	0.1	False	normal	0.01	0.0	4000	150	0	False	False	False	30	normal	0.1	0.02	200	0.00025	0.0	-1	200000	True	0.0	0	0.0	True	151111638	10	16	41066400	267735
True	0	1	60	False	-1	0.25	False	True	410	41	2100	410	../data/wikitext-103	wt103	False	0.5	[0, 1]	1	0.0	0.1	False	normal	0.01	0.0	4000	150	0	False	False	False	30	normal	0.1	0.02	200	0.00025	0.0	-1	200000	True	0.0	0	0.0	True	151111638	10	16	41066400	267735
True	0	1	60	False	-1	0.25	False	True	410	41	2100	410	../data/wikitext-103	wt103	False	0.5	[2, 3]	1	0.0	0.1	False	normal	0.01	0.0	4000	150	0	False	False	False	30	normal	0.1	0.02	200	0.00025	0.0	-1	200000	True	1.0	0	0.0	True	151111638	10	16	41066400	267735
True	0	1	60	False	-1	0.25	False	True	410	41	2100	410	../data/wikitext-103	wt103	False	0.5	[0, 1]	1	0.0	0.1	False	normal	0.01	0.0	4000	150	0	False	False	False	30	normal	0.1	0.02	200	0.00025	0.0	-1	200000	True	1.0	0	0.0	True	151111638	10	16	41066400	267735
True	0	1	60	False	-1	0.25	False	True	410	41	2100	410	../data/wikitext-103	wt103	False	0.5	[0, 1]	1	0.0	0.1	False	normal	0.01	0.0	4000	150	0	False	False	False	30	normal	0.1	0.02	200	0.00025	0.0	-1	200000	True	1.0	0	0.0	True	151111638	10	16	41066400	267735
True	0	1	60	False	-1	0.25	False	True	410	41	2100	410	../data/wikitext-103	wt103	False	0.5	[2, 3]	1	0.0	0.1	False	normal	0.01	0.0	4000	150	0	False	False	False	30	normal	0.1	0.02	200	0.00025	0.0	-1	200000	True	1.0	0	0.0	True	151111638	10	16	41066400	267735
True	0	1	128	False	-1	0.25	False	True	410	41	2100	410	../data/wikitext-103	wt103	False	0.5	[0, 1]	1	0.0	0.1	False	normal	0.01	0.0	4000	50	0	False	False	False	64	normal	0.1	0.02	200	0.00025	0.0	-1	200000	False	0.0	200	0.0	True	151107538	10	16	41066400	267735
False	0	1	64	False	-1	0.25	False	True	512	64	2048	512	../data/enwik8/	enwik8	False	0.5	[0, 1]	1	0.0	0.1	False	normal	0.01	0.0	4000	128	0	False	False	False	32	normal	0.1	0.02	200	0.00025	0.0	-1	400000	False	0.0	100	0.0	True	41055436	8	12	40949760	204
True	0	1	128		-1	0.25	False	True	410	41	2100	410	../data/wikitext-103	wt103	False	0.5	[2, 3]	1	0.0	0.1	False	normal	0.01	0.0	4000	50	0	False	False	False	64	normal	0.1	0.02	200	0.00025	0.0	-1	200000	True	0.0	0	0.0	True	151107538	10	16	41066400	267735
True	0	1	60		-1	0.25	False	True	410	41	2100	410	../data/wikitext-103/	wt103	False	0.5	[0, 1]	1	0.0	0.1	False	normal	0.01	0.0	4000	150	0	False	False	False	30	normal	0.1	0.02	200	0.00025	0.0	-1	200000	False	0.0	150	0.0	True	151107538	10	16	41066400	267735
True	0	1	60		-1	0.25	False	True	410	41	2100	410	../data/wikitext-103	wt103	False	0.5	[2, 3]	1	0.0	0.1	False	normal	0.01	0.0	4000	150	0	False	False	False	30	normal	0.1	0.02	200	0.00025	0.0	-1	200000	False	0.0	150	0.0	True	151107538	10	16	41066400	267735
True	0	1	60		-1	0.25	False	True	410	41	2100	410	../data/wikitext-103	wt103	False	0.5	[2, 3]	1	0.0	0.1	False	normal	0.01	0.0	4000	150	0	False	False	False	30	normal	0.1	0.02	200	0.00025	0.0	-1	200000	False	0.0	150	0.0	True	151107538	10	16	41066400	267735
True	0	1	60	False	-1	0.25	False	True	410	41	2100	410	../data/wikitext-103	wt103	False	0.5	[0, 1]	1	0.0	0.1	False	normal	0.01	0.0	4000	150	0	False	False	False	30	normal	0.1	0.02	200	0.00025	0.0	-1	200000	True	1.0	0	0.0	True	151117788	10	16	41066400	267735
True	0	1	60	False	-1	0.25	False	True	410	41	2100	410	../data/wikitext-103	wt103	False	0.5	[0, 1]	1	0.0	0.1	False	normal	0.01	0.0	4000	150	0	False	False	False	30	normal	0.1	0.02	200	0.00025	0.0	-1	200000	True	2.0	0	0.0	True	151117788	10	16	41066400	267735
True	0	1	60	False	-1	0.25	False	True	410	41	2100	410	../data/wikitext-103	wt103	False	0.5	[2, 3]	1	0.0	0.1	False	normal	0.01	0.0	4000	150	0	False	False	False	30	normal	0.1	0.02	200	0.00025	0.0	-1	200000	True	2.0	0	0.0	True	151117788	10	16	41066400	267735
True	0	1	60	False	-1	0.25	False	True	410	41	2100	410	../data/wikitext-103	wt103	False	0.5	[0, 1]	1	0.0	0.1	False	normal	0.01	0.0	4000	150	0	False	False	False	30	normal	0.1	0.02	200	0.00025	0.0	-1	200000	True	2.0	0	0.0	True	151117788	10	16	41066400	267735
True	0	1	128	False	-1	0.25	False	True	410	41	2100	410	../data/wikitext-103	wt103	False	0.5	[0, 1, 2, 3]	1	0.0	0.1	False	normal	0.01	0.0	4000	50	0	False	False	False	32	normal	0.1	0.02	200	0.00025	0.0	-1	200000	True	0.0	0	0.0	True	151107948	10	16	41066400	267735
True	0	1	128	False	-1	0.25	False	True	410	41	2100	410	../data/wikitext-103	wt103	False	0.5	[2, 3]	1	0.0	0.1	False	normal	0.01	0.0	4000	50	0	False	False	False	64	normal	0.1	0.02	200	0.00025	0.0	-1	200000	True	0.0	0	0.0	True	151107948	10	16	41066400	267735
False	0	1	64	False	-1	0.25	False	True	512	64	2048	512	../data/enwik8/	enwik8	False	0.5	[2, 3]	1	0.0	0.1	False	normal	0.01	0.0	4000	128	0	False	False	False	32	normal	0.1	0.02	200	0.00025	0.0	-1	400000	False	0.0	10	0.0	True	41055436	8	12	40949760	204
False	0	1	64	False	-1	0.25	False	True	512	64	2048	512	../data/enwik8/	enwik8	False	0.5	[4, 5, 7]	1	0.0	0.1	False	normal	0.01	0.0	4000	128	0	False	False	False	20	normal	0.1	0.02	200	0.00025	0.0	-1	400000	False	0.0	10	0.0	True	41055436	8	12	40949760	204
True	0	1	128	False	-1	0.25	False	True	410	41	2100	410	../data/wikitext-103	wt103	False	0.5	[0, 1]	1	0.0	0.1	False	normal	0.01	0.0	4000	50	0	False	False	False	64	normal	0.1	0.02	200	0.00025	0.0	-1	200000	True	4.0	0	0.0	True	151109588	10	16	41066400	267735
True	0	1	128	False	-1	0.25	False	True	410	41	2100	410	../data/wikitext-103	wt103	False	0.5	[2, 3]	1	0.0	0.1	False	normal	0.01	0.0	4000	50	0	False	False	False	64	normal	0.1	0.02	200	0.00025	0.0	-1	200000	True	4.0	0	0.0	True	151109588	10	16	41066400	267735
True	0	1	128	False	-1	0.25	False	True	410	41	2100	410	../data/wikitext-103	wt103	False	0.5	[0, 1]	1	0.0	0.1	False	normal	0.01	0.0	4000	50	0	False	False	False	64	normal	0.1	0.02	200	0.00025	0.0	-1	200000	True	4.0	0	0.0	True	151109588	10	16	41066400	267735
True	0	1	60		-1	0.25	False	True	410	41	2100	410	../data/wikitext-103/	wt103	False	0.5	[2, 3]	1	0.0	0.1	False	normal	0.01	0.0	4000	150	0	False	False	False	30	normal	0.1	0.02	200	0.00025	0.0	-1	200000	False	0.0	0	0.0	True	151169038	10	16	41066400	267735
True	0	1	128	False	-1	0.25	False	True	410	41	2100	410	../data/wikitext-103	wt103	False	0.5	[0, 1]	1	0.0	0.1	False	normal	0.01	0.0	4000	50	0	False	False	False	64	normal	0.1	0.02	200	0.00025	0.0	-1	200000	False	0.0	10	0.0	True	151107538	10	16	41066400	267735
True	0	1	128		-1	0.25	False	True	410	41	2100	410	../data/wikitext-103	wt103	False	0.5	[2, 3]	1	0.0	0.1	False	normal	0.01	0.0	4000	50	0	False	False	False	64	normal	0.1	0.02	200	0.00025	0.0	-1	200000	False	0.0	10	0.0	True	151107538	10	16	41066400	267735
False	0	1	64	False	-1	0.25	False	True	512	64	2048	512	../data/enwik8/	enwik8	False	0.5	[2, 3]	1	0.0	0.1	False	normal	0.01	0.0	4000	128	0	False	False	False	32	normal	0.1	0.02	200	0.00025	0.0	-1	400000	False	0.0	0	0.0	True	41055436	8	12	40949760	204
False	0	1	64	False	-1	0.25	False	True	512	64	2048	512	../data/enwik8/	enwik8	False	0.5	[4, 5, 7]	1	0.0	0.1	False	normal	0.01	0.0	4000	128	0	False	False	False	20	normal	0.1	0.02	200	0.00025	0.0	-1	400000	False	0.0	0	0.0	True	41055436	8	12	40949760	204
True	0	1	128	False	-1	0.25	False	True	410	41	2100	410	../data/wikitext-103	wt103	False	0.5	[2, 3]	1	0.0	0.1	False	normal	0.01	0.0	4000	50	0	False	False	False	64	normal	0.1	0.02	200	0.00025	0.0	-1	200000	True	2.0	0	0.0	True	151111638	10	16	41066400	267735
True	0	1	128	False	-1	0.25	False	True	410	41	2100	410	../data/wikitext-103	wt103	False	0.5	[0, 1]	1	0.0	0.1	False	normal	0.01	0.0	4000	50	0	False	False	False	64	normal	0.1	0.02	200	0.00025	0.0	-1	200000	True	2.0	0	0.0	True	151111638	10	16	41066400	267735
True	0	1	128		-1	0.25	False	True	410	41	2100	410	../data/wikitext-103	wt103	False	0.5	[0, 1]	1	0.0	0.1	False	normal	0.01	0.0	4000	50	0	False	False	False	64	normal	0.1	0.02	200	0.00025	0.0	-1	200000	True	0.0	0	0.0	True	151107538	10	16	41066400	267735
True	0	1	128	False	-1	0.25	False	True	410	41	2100	410	../data/wikitext-103	wt103	False	0.5	[2, 3]	1	0.0	0.1	False	normal	0.01	0.0	4000	50	0	False	False	False	64	normal	0.1	0.02	200	0.00025	0.0	-1	200000	False	0.0	25	0.0	True	151107538	10	16	41066400	267735
True	0	1	128		-1	0.25	False	True	410	41	2100	410	../data/wikitext-103	wt103	False	0.5	[0, 1]	1	0.0	0.1	False	normal	0.01	0.0	4000	50	0	False	False	False	64	normal	0.1	0.02	200	0.00025	0.0	-1	200000	False	0.0	25	0.0	True	151107538	10	16	41066400	267735
[truncated: 23 more columns]
