# Supplementary material
Source: ML conference proceedings conference paper supplement (https://proceedings.neurips.cc/paper_files/paper/2022/hash/47e288629a6996a17ce50b90a056a0e1-Abstract.html)
Supplement: Supplementary file 1 [file 47e288629a6996a17ce50b90a056a0e1-Supplemental-Conference.zip › RMT_supp/results_csv/short_synthetic+MT.csv]

dataset	n_layer	n_head	d_head	d_embed	d_model	d_inner	dropout	dropatt	init	emb_init	init_range	emb_init_range	init_std	proj_init_std	optim	lr	mom	scheduler	warmup_step	decay_rate	lr_min	clip	clip_nonemb	max_step	batch_size	batch_chunk	tgt_len	eval_tgt_len	ext_len	mem_len	num_mem_tokens	not_tied	seed	cuda	adaptive	div_val	pre_lnorm	varlen	multi_gpu	log_interval	eval_interval	restart	restart_dir	debug	same_length	attn_type	clamp_len	eta_min	gpu0_bsz
copy	4	4	64	128	128	256	0.1	0	normal	normal	0.1	0.01	0.02	0.01	adam	0.0001	0	dev_perf	0	0.5	0.000001	0.25	False	400000	32	1	72	72	0	0	0	False	2049	True	False	1	False	False	True	1000	12000	False		False	False	0	-1	0	-1
copy	4	4	64	128	128	256	0.1	0	normal	normal	0.1	0.01	0.02	0.01	adam	0.0001	0	dev_perf	0	0.5	0.000001	0.25	False	400000	32	1	72	72	0	0	0	False	1234	True	False	1	False	False	True	1000	12000	False		False	False	0	-1	0	-1
copy	4	4	64	128	128	256	0.1	0	normal	normal	0.1	0.01	0.02	0.01	adam	0.0001	0	dev_perf	0	0.5	0.000001	0.25	False	400000	32	1	72	72	0	0	0	False	2022	True	False	1	False	False	True	1000	12000	False		False	False	0	-1	0	-1
copy	4	4	64	128	128	256	0.1	0	normal	normal	0.1	0.01	0.02	0.01	adam	0.0001	0	dev_perf	0	0.5	0.000001	0.25	False	900000	32	1	12	12	0	0	12	False	1234	True	False	1	False	False	True	1000	12000	False		False	False	0	-1	0	-1
copy	4	4	64	128	128	256	0.1	0	normal	normal	0.1	0.01	0.02	0.01	adam	0.0001	0	dev_perf	0	0.5	0.000001	0.25	False	900000	32	1	12	12	0	0	12	False	2022	True	False	1	False	False	True	1000	12000	False		False	False	0	-1	0	-1
copy	4	4	64	128	128	256	0.1	0	normal	normal	0.1	0.01	0.02	0.01	adam	0.0001	0	dev_perf	0	0.5	0.000001	0.25	False	700000	32	1	12	12	0	6	0	False	6022	True	False	1	False	False	True	1000	12000	False		False	False	0	-1	0	-1
copy	4	4	64	128	128	256	0.1	0	normal	normal	0.1	0.01	0.02	0.01	adam	0.0001	0	dev_perf	0	0.5	0.000001	0.25	False	700000	32	1	12	12	0	6	0	False	6234	True	False	1	False	False	True	1000	12000	False		False	False	0	-1	0	-1
copy	4	4	64	128	128	256	0.1	0	normal	normal	0.1	0.01	0.02	0.01	adam	0.0001	0	dev_perf	0	0.5	0.000001	0.25	False	700000	32	1	12	12	0	6	0	False	4022	True	False	1	False	False	True	1000	12000	False		False	False	0	-1	0	-1
copy	4	4	64	128	128	256	0.1	0	normal	normal	0.1	0.01	0.02	0.01	adam	0.0001	0	dev_perf	0	0.5	0.000001	0.25	False	700000	32	1	12	12	0	6	0	False	4234	True	False	1	False	False	True	1000	12000	False		False	False	0	-1	0	-1
copy	4	4	64	128	128	256	0.1	0	normal	normal	0.1	0.01	0.02	0.01	adam	0.0001	0	dev_perf	0	0.5	0.000001	0.25	False	400000	32	1	24	24	0	0	24	False	1234	True	False	1	False	False	True	1000	12000	False		False	False	0	-1	0	-1
copy	4	4	64	128	128	256	0.1	0	normal	normal	0.1	0.01	0.02	0.01	adam	0.0001	0	dev_perf	0	0.5	0.000001	0.25	False	400000	32	1	24	24	0	0	24	False	2049	True	False	1	False	False	True	1000	12000	False		False	False	0	-1	0	-1
copy	4	4	64	128	128	256	0.1	0	normal	normal	0.1	0.01	0.02	0.01	adam	0.0001	0	dev_perf	0	0.5	0.000001	0.25	False	400000	32	1	24	24	0	0	24	False	2022	True	False	1	False	False	True	1000	12000	False		False	False	0	-1	0	-1
copy	4	4	64	128	128	256	0.1	0	normal	normal	0.1	0.01	0.02	0.01	adam	0.0001	0	dev_perf	0	0.5	0.000001	0.25	False	900000	32	1	12	12	0	12	0	False	2022	True	False	1	False	False	True	1000	12000	False		False	False	0	-1	0	-1
copy	4	4	64	128	128	256	0.1	0	normal	normal	0.1	0.01	0.02	0.01	adam	0.0001	0	dev_perf	0	0.5	0.000001	0.25	False	700000	32	1	12	12	0	0	6	False	9123	True	False	1	False	False	True	1000	12000	False		False	False	0	-1	0	-1
copy	4	4	64	128	128	256	0.1	0	normal	normal	0.1	0.01	0.02	0.01	adam	0.0001	0	dev_perf	0	0.5	0.000001	0.25	False	700000	32	1	12	12	0	0	6	False	4234	True	False	1	False	False	True	1000	12000	False		False	False	0	-1	0	-1
copy	4	4	64	128	128	256	0.1	0	normal	normal	0.1	0.01	0.02	0.01	adam	0.0001	0	dev_perf	0	0.5	0.000001	0.25	False	700000	32	1	12	12	0	0	6	False	1234	True	False	1	False	False	True	1000	12000	False		False	False	0	-1	0	-1
copy	4	4	64	128	128	256	0.1	0	normal	normal	0.1	0.01	0.02	0.01	adam	0.0001	0	dev_perf	0	0.5	0.000001	0.25	False	700000	32	1	12	12	0	0	6	False	4022	True	False	1	False	False	True	1000	12000	False		False	False	0	-1	0	-1
copy	4	4	64	128	128	256	0.1	0	normal	normal	0.1	0.01	0.02	0.01	adam	0.0001	0	dev_perf	0	0.5	0.000001	0.25	False	900000	32	1	8	8	0	0	8	False	5212	True	False	1	False	False	True	1000	12000	False		False	False	0	-1	0	-1
copy	4	4	64	128	128	256	0.1	0	normal	normal	0.1	0.01	0.02	0.01	adam	0.0001	0	dev_perf	0	0.5	0.000001	0.25	False	900000	32	1	8	8	0	0	8	False	3022	True	False	1	False	False	True	1000	12000	False		False	False	0	-1	0	-1
copy	4	4	64	128	128	256	0.1	0	normal	normal	0.1	0.01	0.02	0.01	adam	0.0001	0	dev_perf	0	0.5	0.000001	0.25	False	400000	32	1	24	24	0	0	0	False	2049	True	False	1	False	False	True	1000	12000	False		False	False	0	-1	0	-1
copy	4	4	64	128	128	256	0.1	0	normal	normal	0.1	0.01	0.02	0.01	adam	0.0001	0	dev_perf	0	0.5	0.000001	0.25	False	400000	32	1	24	24	0	0	0	False	1234	True	False	1	False	False	True	1000	12000	False		False	False	0	-1	0	-1
copy	4	4	64	128	128	256	0.1	0	normal	normal	0.1	0.01	0.02	0.01	adam	0.0001	0	dev_perf	0	0.5	0.000001	0.25	False	400000	32	1	24	24	0	0	0	False	2022	True	False	1	False	False	True	1000	12000	False		False	False	0	-1	0	-1
copy	4	4	64	128	128	256	0.1	0	normal	normal	0.1	0.01	0.02	0.01	adam	0.0001	0	dev_perf	0	0.5	0.000001	0.25	False	900000	32	1	8	8	0	8	0	False	5234	True	False	1	False	False	True	1000	12000	False		False	False	0	-1	0	-1
copy	4	4	64	128	128	256	0.1	0	normal	normal	0.1	0.01	0.02	0.01	adam	0.0001	0	dev_perf	0	0.5	0.000001	0.25	False	400000	32	1	24	24	0	24	0	False	2022	True	False	1	False	False	True	1000	12000	False		False	False	0	-1	0	-1
copy	4	4	64	128	128	256	0.1	0	normal	normal	0.1	0.01	0.02	0.01	adam	0.0001	0	dev_perf	0	0.5	0.000001	0.25	False	400000	32	1	24	24	0	24	0	False	2049	True	False	1	False	False	True	1000	12000	False		False	False	0	-1	0	-1
copy	4	4	64	128	128	256	0.1	0	normal	normal	0.1	0.01	0.02	0.01	adam	0.0001	0	dev_perf	0	0.5	0.000001	0.25	False	400000	32	1	24	24	0	24	0	False	1234	True	False	1	False	False	True	1000	12000	False		False	False	0	-1	0	-1
copy	4	4	64	128	128	256	0.1	0	normal	normal	0.1	0.01	0.02	0.01	adam	0.0001	0	dev_perf	0	0.5	0.000001	0.25	False	900000	32	1	12	12	0	12	0	False	1234	True	False	1	False	False	True	1000	12000	False		False	False	0	-1	0	-1
copy	4	4	64	128	128	256	0.1	0	normal	normal	0.1	0.01	0.02	0.01	adam	0.0001	0	dev_perf	0	0.5	0.000001	0.25	False	900000	32	1	8	8	0	0	8	False	5022	True	False	1	False	False	True	1000	12000	False		False	False	0	-1	0	-1
copy	4	4	64	128	128	256	0.1	0	normal	normal	0.1	0.01	0.02	0.01	adam	0.0001	0	dev_perf	0	0.5	0.000001	0.25	False	900000	32	1	8	8	0	8	0	False	8234	True	False	1	False	False	True	1000	12000	False		False	False	0	-1	0	-1
copy	4	4	64	128	128	256	0.1	0	normal	normal	0.1	0.01	0.02	0.01	adam	0.0001	0	dev_perf	0	0.5	0.000001	0.25	False	900000	32	1	12	12	0	0	0	False	2022	True	False	1	False	False	True	1000	12000	False		False	False	0	-1	0	-1
copy	4	4	64	128	128	256	0.1	0	normal	normal	0.1	0.01	0.02	0.01	adam	0.0001	0	dev_perf	0	0.5	0.000001	0.25	False	900000	32	1	12	12	0	0	12	False	2722	True	False	1	False	False	True	1000	12000	False		False	False	0	-1	0	-1
copy	4	4	64	128	128	256	0.1	0	normal	normal	0.1	0.01	0.02	0.01	adam	0.0001	0	dev_perf	0	0.5	0.000001	0.25	False	900000	32	1	12	12	0	12	0	False	2722	True	False	1	False	False	True	1000	12000	False		False	False	0	-1	0	-1
copy	4	4	64	128	128	256	0.1	0	normal	normal	0.1	0.01	0.02	0.01	adam	0.0001	0	dev_perf	0	0.5	0.000001	0.25	False	900000	32	1	8	8	0	0	8	False	5272	True	False	1	False	False	True	1000	12000	False		False	False	0	-1	0	-1
copy	4	4	64	128	128	256	0.1	0	normal	normal	0.1	0.01	0.02	0.01	adam	0.0001	0	dev_perf	0	0.5	0.000001	0.25	False	500000	32	1	24	12	0	0	12	False	1234	True	False	1	False	False	True	1000	12000	False		False	False	0	-1	0	-1
copy	4	4	64	128	128	256	0.1	0	normal	normal	0.1	0.01	0.02	0.01	adam	0.0001	0	dev_perf	0	0.5	0.000001	0.25	False	500000	32	1	24	12	0	12	0	False	1234	True	False	1	False	False	True	200	4000	False		False	False	0	-1	0	-1
copy	4	4	64	128	128	256	0.1	0	normal	normal	0.1	0.01	0.02	0.01	adam	0.0001	0	dev_perf	0	0.5	0.000001	0.25	False	700000	32	1	8	8	0	8	0	False	2022	True	False	1	False	False	True	1000	12000	False		False	False	0	-1	0	-1
copy	4	4	64	128	128	256	0.1	0	normal	normal	0.1	0.01	0.02	0.01	adam	0.0001	0	dev_perf	0	0.5	0.000001	0.25	False	700000	32	1	8	8	0	8	0	False	2022	True	False	1	False	False	True	1000	12000	False		False	False	0	-1	0	-1
copy	4	4	64	128	128	256	0.1	0	normal	normal	0.1	0.01	0.02	0.01	adam	0.0001	0	dev_perf	0	0.5	0.000001	0.25	False	900000	32	1	8	8	0	0	0	False	5372	True	False	1	False	False	True	1000	12000	False		False	False	0	-1	0	-1
copy	4	4	64	128	128	256	0.1	0	normal	normal	0.1	0.01	0.02	0.01	adam	0.0001	0	dev_perf	0	0.5	0.000001	0.25	False	900000	32	1	8	8	0	0	0	False	5273	True	False	1	False	False	True	1000	12000	False		False	False	0	-1	0	-1
copy	4	4	64	128	128	256	0.1	0	normal	normal	0.1	0.01	0.02	0.01	adam	0.0001	0	dev_perf	0	0.5	0.000001	0.25	False	900000	32	1	8	8	0	0	0	False	5472	True	False	1	False	False	True	1000	12000	False		False	False	0	-1	0	-1
copy	4	4	64	128	128	256	0.1	0	normal	normal	0.1	0.01	0.02	0.01	adam	0.0001	0	dev_perf	0	0.5	0.000001	0.25	False	900000	32	1	8	8	0	0	0	False	6273	True	False	1	False	False	True	1000	12000	False		False	False	0	-1	0	-1
copy	4	4	64	128	128	256	0.1	0	normal	normal	0.1	0.01	0.02	0.01	adam	0.0001	0	dev_perf	0	0.5	0.000001	0.25	False	900000	32	1	8	8	0	0	0	False	5272	True	False	1	False	False	True	1000	12000	False		False	False	0	-1	0	-1
copy	4	4	64	128	128	256	0.1	0	normal	normal	0.1	0.01	0.02	0.01	adam	0.0001	0	dev_perf	0	0.5	0.000001	0.25	False	400000	32	1	8	8	0	8	0	False	2022	True	False	1	False	False	True	1000	12000	False		False	False	0	-1	0	-1
copy	4	4	64	128	128	256	0.1	0	normal	normal	0.1	0.01	0.02	0.01	adam	0.0001	0	dev_perf	0	0.5	0.000001	0.25	False	900000	32	1	8	8	0	8	0	False	8234	True	False	1	False	False	True	1000	12000	False		False	False	0	-1	0	-1
copy	4	4	64	128	128	256	0.1	0	normal	normal	0.1	0.01	0.02	0.01	adam	0.0001	0	dev_perf	0	0.5	0.000001	0.25	False	900000	32	1	8	8	0	8	0	False	5234	True	False	1	False	False	True	1000	12000	False		False	False	0	-1	0	-1
copy	4	4	64	128	128	256	0.1	0	normal	normal	0.1	0.01	0.02	0.01	adam	0.0001	0	dev_perf	0	0.5	0.000001	0.25	False	900000	32	1	8	8	0	8	0	False	8022	True	False	1	False	False	True	1000	12000	False		False	False	0	-1	0	-1
copy	4	4	64	128	128	256	0.1	0	normal	normal	0.1	0.01	0.02	0.01	adam	0.0001	0	dev_perf	0	0.5	0.000001	0.25	False	400000	32	1	8	8	0	8	0	False	1234	True	False	1	False	False	True	1000	12000	False		False	False	0	-1	0	-1
copy	4	4	64	128	128	256	0.1	0	normal	normal	0.1	0.01	0.02	0.01	adam	0.0001	0	dev_perf	0	0.5	0.000001	0.25	False	900000	32	1	8	8	0	8	0	False	5236	True	False	1	False	False	True	1000	12000	False		False	False	0	-1	0	-1
copy	4	4	64	128	128	256	0.1	0	normal	normal	0.1	0.01	0.02	0.01	adam	0.0001	0	dev_perf	0	0.5	0.000001	0.25	False	900000	32	1	8	8	0	8	0	False	5022	True	False	1	False	False	True	1000	12000	False		False	False	0	-1	0	-1
copy	4	4	64	128	128	256	0.1	0	normal	normal	0.1	0.01	0.02	0.01	adam	0.0001	0	dev_perf	0	0.5	0.000001	0.25	False	1000000	32	1	5	5	0	0	5	False	1111	True	False	1	False	False	True	4000	12000	False		False	False	0	-1	0	-1
copy	4	4	64	128	128	256	0.1	0	normal	normal	0.1	0.01	0.02	0.01	adam	0.0001	0	dev_perf	0	0.5	0.000001	0.25	False	900000	32	1	12	12	0	0	12	False	1112	True	False	1	False	False	True	4000	12000	False		False	False	0	-1	0	-1
copy	4	4	64	128	128	256	0.1	0	normal	normal	0.1	0.01	0.02	0.01	adam	0.0001	0	dev_perf	0	0.5	0.000001	0.25	False	900000	32	1	12	12	0	0	12	False	1111	True	False	1	False	False	True	4000	12000	False		False	False	0	-1	0	-1
copy	4	4	64	128	128	256	0.1	0	normal	normal	0.1	0.01	0.02	0.01	adam	0.0001	0	dev_perf	0	0.5	0.000001	0.25	False	900000	32	1	12	12	0	0	12	False	1113	True	False	1	False	False	True	4000	12000	False		False	False	0	-1	0	-1
copy	4	4	64	128	128	256	0.1	0	normal	normal	0.1	0.01	0.02	0.01	adam	0.0001	0	dev_perf	0	0.5	0.000001	0.25	False	900000	32	1	8	8	0	0	8	False	1112	True	False	1	False	False	True	4000	12000	False		False	False	0	-1	0	-1
copy	4	4	64	128	128	256	0.1	0	normal	normal	0.1	0.01	0.02	0.01	adam	0.0001	0	dev_perf	0	0.5	0.000001	0.25	False	900000	32	1	8	8	0	0	8	False	1113	True	False	1	False	False	True	4000	12000	False		False	False	0	-1	0	-1
copy	4	4	64	128	128	256	0.1	0	normal	normal	0.1	0.01	0.02	0.01	adam	0.0001	0	dev_perf	0	0.5	0.000001	0.25	False	900000	32	1	8	8	0	0	8	False	1111	True	False	1	False	False	True	4000	12000	False		False	False	0	-1	0	-1
copy	4	4	64	128	128	256	0.1	0	normal	normal	0.1	0.01	0.02	0.01	adam	0.0001	0	dev_perf	0	0.5	0.000001	0.25	False	400000	32	1	24	24	0	0	24	False	1113	True	False	1	False	False	True	4000	12000	False		False	False	0	-1	0	-1
copy	4	4	64	128	128	256	0.1	0	normal	normal	0.1	0.01	0.02	0.01	adam	0.0001	0	dev_perf	0	0.5	0.000001	0.25	False	400000	32	1	24	24	0	0	24	False	1111	True	False	1	False	False	True	4000	12000	False		False	False	0	-1	0	-1
copy	4	4	64	128	128	256	0.1	0	normal	normal	0.1	0.01	0.02	0.01	adam	0.0001	0	dev_perf	0	0.5	0.000001	0.25	False	400000	32	1	24	24	0	0	24	False	1112	True	False	1	False	False	True	4000	12000	False		False	False	0	-1	0	-1
reverse	4	4	64	128	128	256	0.1	0	normal	normal	0.1	0.01	0.02	0.01	adam	0.0001	0	dev_perf	0	0.5	0.000001	0.25	False	700000	32	1	8	8	0	8	0	False	4212	True	False	1	False	False	True	1000	12000	False		False	False	0	-1	0	-1
reverse	4	4	64	128	128	256	0.1	0	normal	normal	0.1	0.01	0.02	0.01	adam	0.0001	0	dev_perf	0	0.5	0.000001	0.25	False	700000	32	1	8	8	0	8	0	False	4211	True	False	1	False	False	True	1000	12000	False		False	False	0	-1	0	-1
reverse	4	4	64	128	128	256	0.1	0	normal	normal	0.1	0.01	0.02	0.01	adam	0.0001	0	dev_perf	0	0.5	0.000001	0.25	False	700000	32	1	8	8	0	8	0	False	4213	True	False	1	False	False	True	1000	12000	False		False	False	0	-1	0	-1
reverse	4	4	64	128	128	256	0.1	0	normal	normal	0.1	0.01	0.02	0.01	adam	0.0001	0	dev_perf	0	0.5	0.000001	0.25	False	400000	32	1	24	24	0	24	0	False	2022	True	False	1	False	False	True	1000	12000	False		False	False	0	-1	0	-1
reverse	4	4	64	128	128	256	0.1	0	normal	normal	0.1	0.01	0.02	0.01	adam	0.0001	0	dev_perf	0	0.5	0.000001	0.25	False	400000	32	1	24	24	0	24	0	False	1512	True	False	1	False	False	True	1000	12000	False		False	False	0	-1	0	-1
reverse	4	4	64	128	128	256	0.1	0	normal	normal	0.1	0.01	0.02	0.01	adam	0.0001	0	dev_perf	0	0.5	0.000001	0.25	False	400000	32	1	24	24	0	24	0	False	2049	True	False	1	False	False	True	1000	12000	False		False	False	0	-1	0	-1
reverse	4	4	64	128	128	256	0.1	0	normal	normal	0.1	0.01	0.02	0.01	adam	0.0001	0	dev_perf	0	0.5	0.000001	0.25	False	400000	32	1	24	24	0	24	0	False	1212	True	False	1	False	False	True	1000	12000	False		False	False	0	-1	0	-1
reverse	4	4	64	128	128	256	0.1	0	normal	normal	0.1	0.01	0.02	0.01	adam	0.0001	0	dev_perf	0	0.5	0.000001	0.25	False	850000	32	1	12	12	0	0	12	False	2049	True	False	1	False	False	True	1000	12000	False		False	False	0	-1	0	-1
reverse	4	4	64	128	128	256	0.1	0	normal	normal	0.1	0.01	0.02	0.01	adam	0.0001	0	dev_perf	0	0.5	0.000001	0.25	False	850000	32	1	12	12	0	0	12	False	2023	True	False	1	False	False	True	1000	12000	False		False	False	0	-1	0	-1
reverse	4	4	64	128	128	256	0.1	0	normal	normal	0.1	0.01	0.02	0.01	adam	0.0001	0	dev_perf	0	0.5	0.000001	0.25	False	850000	32	1	12	12	0	0	12	False	1212	True	False	1	False	False	True	1000	12000	False		False	False	0	-1	0	-1
reverse	4	4	64	128	128	256	0.1	0	normal	normal	0.1	0.01	0.02	0.01	adam	0.0001	0	dev_perf	0	0.5	0.000001	0.25	False	700000	32	1	8	8	0	0	8	False	4211	True	False	1	False	False	True	1000	12000	False		False	False	0	-1	0	-1
reverse	4	4	64	128	128	256	0.1	0	normal	normal	0.1	0.01	0.02	0.01	adam	0.0001	0	dev_perf	0	0.5	0.000001	0.25	False	850000	32	1	12	12	0	12	0	False	1222	True	False	1	False	False	True	1000	12000	False		False	False	0	-1	0	-1
reverse	4	4	64	128	128	256	0.1	0	normal	normal	0.1	0.01	0.02	0.01	adam	0.0001	0	dev_perf	0	0.5	0.000001	0.25	False	850000	32	1	12	12	0	12	0	False	1322	True	False	1	False	False	True	1000	12000	False		False	False	0	-1	0	-1
reverse	4	4	64	128	128	256	0.1	0	normal	normal	0.1	0.01	0.02	0.01	adam	0.0001	0	dev_perf	0	0.5	0.000001	0.25	False	850000	32	1	12	12	0	12	0	False	2003	True	False	1	False	False	True	1000	12000	False		False	False	0	-1	0	-1
reverse	4	4	64	128	128	256	0.1	0	normal	normal	0.1	0.01	0.02	0.01	adam	0.0001	0	dev_perf	0	0.5	0.000001	0.25	False	700000	32	1	8	8	0	0	8	False	3222	True	False	1	False	False	True	1000	12000	False		False	False	0	-1	0	-1
reverse	4	4	64	128	128	256	0.1	0	normal	normal	0.1	0.01	0.02	0.01	adam	0.0001	0	dev_perf	0	0.5	0.000001	0.25	False	700000	32	1	8	8	0	0	8	False	4213	True	False	1	False	False	True	1000	12000	False		False	False	0	-1	0	-1
reverse	4	4	64	128	128	256	0.1	0	normal	normal	0.1	0.01	0.02	0.01	adam	0.0001	0	dev_perf	0	0.5	0.000001	0.25	False	700000	32	1	8	8	0	0	8	False	4212	True	False	1	False	False	True	1000	12000	False		False	False	0	-1	0	-1
reverse	4	4	64	128	128	256	0.1	0	normal	normal	0.1	0.01	0.02	0.01	adam	0.0001	0	dev_perf	0	0.5	0.000001	0.25	False	700000	32	1	8	8	0	0	8	False	1212	True	False	1	False	False	True	1000	12000	False		False	False	0	-1	0	-1
reverse	4	4	64	128	128	256	0.1	0	normal	normal	0.1	0.01	0.02	0.01	adam	0.0001	0	dev_perf	0	0.5	0.000001	0.25	False	700000	32	1	8	8	0	0	8	False	4211	True	False	1	False	False	True	1000	12000	False		False	False	0	-1	0	-1
reverse	4	4	64	128	128	256	0.1	0	normal	normal	0.1	0.01	0.02	0.01	adam	0.0001	0	dev_perf	0	0.5	0.000001	0.25	False	850000	32	1	12	12	0	6	0	False	3023	True	False	1	False	False	True	1000	12000	False		False	False	0	-1	0	-1
reverse	4	4	64	128	128	256	0.1	0	normal	normal	0.1	0.01	0.02	0.01	adam	0.0001	0	dev_perf	0	0.5	0.000001	0.25	False	850000	32	1	12	12	0	6	0	False	3212	True	False	1	False	False	True	1000	12000	False		False	False	0	-1	0	-1
reverse	4	4	64	128	128	256	0.1	0	normal	normal	0.1	0.01	0.02	0.01	adam	0.0001	0	dev_perf	0	0.5	0.000001	0.25	False	850000	32	1	12	12	0	6	0	False	3049	True	False	1	False	False	True	1000	12000	False		False	False	0	-1	0	-1
reverse	4	4	64	128	128	256	0.1	0	normal	normal	0.1	0.01	0.02	0.01	adam	0.0001	0	dev_perf	0	0.5	0.000001	0.25	False	850000	32	1	12	12	0	6	0	False	1212	True	False	1	False	False	True	1000	12000	False		False	False	0	-1	0	-1
reverse	4	4	64	128	128	256	0.1	0	normal	normal	0.1	0.01	0.02	0.01	adam	0.0001	0	dev_perf	0	0.5	0.000001	0.25	False	850000	32	1	12	12	0	0	6	False	2023	True	False	1	False	False	True	1000	12000	False		False	False	0	-1	0	-1
reverse	4	4	64	128	128	256	0.1	0	normal	normal	0.1	0.01	0.02	0.01	adam	0.0001	0	dev_perf	0	0.5	0.000001	0.25	False	850000	32	1	12	12	0	0	6	False	1212	True	False	1	False	False	True	1000	12000	False		False	False	0	-1	0	-1
reverse	4	4	64	128	128	256	0.1	0	normal	normal	0.1	0.01	0.02	0.01	adam	0.0001	0	dev_perf	0	0.5	0.000001	0.25	False	850000	32	1	12	12	0	0	6	False	2049	True	False	1	False	False	True	1000	12000	False		False	False	0	-1	0	-1
reverse	4	4	64	128	128	256	0.1	0	normal	normal	0.1	0.01	0.02	0.01	adam	0.0001	0	dev_perf	0	0.5	0.000001	0.25	False	250000	32	1	48	48	0	0	0	False	1212	True	False	1	False	False	True	1000	12000	False		False	False	0	-1	0	-1
reverse	4	4	64	128	128	256	0.1	0	normal	normal	0.1	0.01	0.02	0.01	adam	0.0001	0	dev_perf	0	0.5	0.000001	0.25	False	250000	32	1	48	48	0	0	0	False	2023	True	False	1	False	False	True	1000	12000	False		False	False	0	-1	0	-1
reverse	4	4	64	128	128	256	0.1	0	normal	normal	0.1	0.01	0.02	0.01	adam	0.0001	0	dev_perf	0	0.5	0.000001	0.25	False	250000	32	1	48	48	0	0	0	False	2049	True	False	1	False	False	True	1000	12000	False		False	False	0	-1	0	-1
reverse	4	4	64	128	128	256	0.1	0	normal	normal	0.1	0.01	0.02	0.01	adam	0.0001	0	dev_perf	0	0.5	0.000001	0.25	False	400000	32	1	24	24	0	0	24	False	1512	True	False	1	False	False	True	1000	12000	False		False	False	0	-1	0	-1
reverse	4	4	64	128	128	256	0.1	0	normal	normal	0.1	0.01	0.02	0.01	adam	0.0001	0	dev_perf	0	0.5	0.000001	0.25	False	400000	32	1	24	24	0	0	24	False	2049	True	False	1	False	False	True	1000	12000	False		False	False	0	-1	0	-1
reverse	4	4	64	128	128	256	0.1	0	normal	normal	0.1	0.01	0.02	0.01	adam	0.0001	0	dev_perf	0	0.5	0.000001	0.25	False	400000	32	1	24	24	0	0	24	False	1212	True	False	1	False	False	True	1000	12000	False		False	False	0	-1	0	-1
reverse	4	4	64	128	128	256	0.1	0	normal	normal	0.1	0.01	0.02	0.01	adam	0.0001	0	dev_perf	0	0.5	0.000001	0.25	False	400000	32	1	24	24	0	0	24	False	2022	True	False	1	False	False	True	1000	12000	False		False	False	0	-1	0	-1
reverse	4	4	64	128	128	256	0.1	0	normal	normal	0.1	0.01	0.02	0.01	adam	0.0001	0	dev_perf	0	0.5	0.000001	0.25	False	850000	32	1	12	12	0	0	0	False	2023	True	False	1	False	False	True	1000	12000	False		False	False	0	-1	0	-1
reverse	4	4	64	128	128	256	0.1	0	normal	normal	0.1	0.01	0.02	0.01	adam	0.0001	0	dev_perf	0	0.5	0.000001	0.25	False	400000	32	1	24	24	0	0	0	False	2022	True	False	1	False	False	True	1000	12000	False		False	False	0	-1	0	-1
reverse	4	4	64	128	128	256	0.1	0	normal	normal	0.1	0.01	0.02	0.01	adam	0.0001	0	dev_perf	0	0.5	0.000001	0.25	False	400000	32	1	24	24	0	0	0	False	1212	True	False	1	False	False	True	1000	12000	False		False	False	0	-1	0	-1
reverse	4	4	64	128	128	256	0.1	0	normal	normal	0.1	0.01	0.02	0.01	adam	0.0001	0	dev_perf	0	0.5	0.000001	0.25	False	700000	32	1	8	8	0	8	0	False	4711	True	False	1	False	False	True	1000	12000	False		False	False	0	-1	0	-1
reverse	4	4	64	128	128	256	0.1	0	normal	normal	0.1	0.01	0.02	0.01	adam	0.0001	0	dev_perf	0	0.5	0.000001	0.25	False	400000	32	1	24	24	0	0	0	False	2049	True	False	1	False	False	True	1000	12000	False		False	False	0	-1	0	-1
reverse	4	4	64	128	128	256	0.1	0	normal	normal	0.1	0.01	0.02	0.01	adam	0.0001	0	dev_perf	0	0.5	0.000001	0.25	False	700000	32	1	8	8	0	0	0	False	4711	True	False	1	False	False	True	1000	12000	False		False	False	0	-1	0	-1
reverse	4	4	64	128	128	256	0.1	0	normal	normal	0.1	0.01	0.02	0.01	adam	0.0001	0	dev_perf	0	0.5	0.000001	0.25	False	850000	32	1	12	12	0	0	0	False	1212	True	False	1	False	False	True	1000	12000	False		False	False	0	-1	0	-1
reverse	4	4	64	128	128	256	0.1	0	normal	normal	0.1	0.01	0.02	0.01	adam	0.0001	0	dev_perf	0	0.5	0.000001	0.25	False	500000	32	1	24	24	0	12	0	False	2023	True	False	1	False	False	True	1000	12000	False		False	False	0	-1	0	-1
reverse	4	4	64	128	128	256	0.1	0	normal	normal	0.1	0.01	0.02	0.01	adam	0.0001	0	dev_perf	0	0.5	0.000001	0.25	False	500000	32	1	24	24	0	0	12	False	2023	True	False	1	False	False	True	1000	12000	False		False	False	0	-1	0	-1
reverse	4	4	64	128	128	256	0.1	0	normal	normal	0.1	0.01	0.02	0.01	adam	0.0001	0	dev_perf	0	0.5	0.000001	0.25	False	700000	32	1	8	8	0	0	0	False	4727	True	False	1	False	False	True	1000	12000	False		False	False	0	-1	0	-1
reverse	4	4	64	128	128	256	0.1	0	normal	normal	0.1	0.01	0.02	0.01	adam	0.0001	0	dev_perf	0	0.5	0.000001	0.25	False	700000	32	1	8	8	0	8	0	False	4212	True	False	1	False	False	True	1000	12000	False		False	False	0	-1	0	-1
reverse	4	4	64	128	128	256	0.1	0	normal	normal	0.1	0.01	0.02	0.01	adam	0.0001	0	dev_perf	0	0.5	0.000001	0.25	False	700000	32	1	8	8	0	8	0	False	4211	True	False	1	False	False	True	1000	12000	False		False	False	0	-1	0	-1
reverse	4	4	64	128	128	256	0.1	0	normal	normal	0.1	0.01	0.02	0.01	adam	0.0001	0	dev_perf	0	0.5	0.000001	0.25	False	700000	32	1	8	8	0	8	0	False	4213	True	False	1	False	False	True	1000	12000	False		False	False	0	-1	0	-1
reverse	4	4	64	128	128	256	0.1	0	normal	normal	0.1	0.01	0.02	0.01	adam	0.0001	0	dev_perf	0	0.5	0.000001	0.25	False	700000	32	1	8	8	0	8	0	False	4711	True	False	1	False	False	True	1000	12000	False		False	False	0	-1	0	-1
reverse	4	4	64	128	128	256	0.1	0	normal	normal	0.1	0.01	0.02	0.01	adam	0.0001	0	dev_perf	0	0.5	0.000001	0.25	False	700000	32	1	8	8	0	0	0	False	4727	True	False	1	False	False	True	1000	12000	False		False	False	0	-1	0	-1
reverse	4	4	64	128	128	256	0.1	0	normal	normal	0.1	0.01	0.02	0.01	adam	0.0001	0	dev_perf	0	0.5	0.000001	0.25	False	700000	32	1	8	8	0	0	0	False	4711	True	False	1	False	False	True	1000	12000	False		False	False	0	-1	0	-1
reverse	4	4	64	128	128	256	0.1	0	normal	normal	0.1	0.01	0.02	0.01	adam	0.0001	0	dev_perf	0	0.5	0.000001	0.25	False	700000	32	1	8	8	0	0	0	False	4731	True	False	1	False	False	True	1000	12000	False		False	False	0	-1	0	-1
reverse	4	4	64	128	128	256	0.1	0	normal	normal	0.1	0.01	0.02	0.01	adam	0.0001	0	dev_perf	0	0.5	0.000001	0.25	False	700000	32	1	8	8	0	0	0	False	4721	True	False	1	False	False	True	1000	12000	False		False	False	0	-1	0	-1
reverse	4	4	64	128	128	256	0.1	0	normal	normal	0.1	0.01	0.02	0.01	adam	0.0001	0	dev_perf	0	0.5	0.000001	0.25	False	900000	32	1	8	8	0	0	8	False	1113	True	False	1	False	False	True	4000	12000	False		False	False	0	-1	0	-1
reverse	4	4	64	128	128	256	0.1	0	normal	normal	0.1	0.01	0.02	0.01	adam	0.0001	0	dev_perf	0	0.5	0.000001	0.25	False	900000	32	1	8	8	0	0	8	False	1111	True	False	1	False	False	True	4000	12000	False		False	False	0	-1	0	-1
reverse	4	4	64	128	128	256	0.1	0	normal	normal	0.1	0.01	0.02	0.01	adam	0.0001	0	dev_perf	0	0.5	0.000001	0.25	False	900000	32	1	8	8	0	0	8	False	1112	True	False	1	False	False	True	4000	12000	False		False	False	0	-1	0	-1
reverse	4	4	64	128	128	256	0.1	0	normal	normal	0.1	0.01	0.02	0.01	adam	0.0001	0	dev_perf	0	0.5	0.000001	0.25	False	900000	32	1	12	12	0	0	12	False	1111	True	False	1	False	False	True	4000	12000	False		False	False	0	-1	0	-1
reverse	4	4	64	128	128	256	0.1	0	normal	normal	0.1	0.01	0.02	0.01	adam	0.0001	0	dev_perf	0	0.5	0.000001	0.25	False	900000	32	1	12	12	0	0	12	False	1113	True	False	1	False	False	True	4000	12000	False		False	False	0	-1	0	-1
reverse	4	4	64	128	128	256	0.1	0	normal	normal	0.1	0.01	0.02	0.01	adam	0.0001	0	dev_perf	0	0.5	0.000001	0.25	False	900000	32	1	12	12	0	0	12	False	1112	True	False	1	False	False	True	4000	12000	False		False	False	0	-1	0	-1
reverse	4	4	64	128	128	256	0.1	0	normal	normal	0.1	0.01	0.02	0.01	adam	0.0001	0	dev_perf	0	0.5	0.000001	0.25	False	400000	32	1	24	24	0	0	24	False	1112	True	False	1	False	False	True	4000	12000	False		False	False	0	-1	0	-1
reverse	4	4	64	128	128	256	0.1	0	normal	normal	0.1	0.01	0.02	0.01	adam	0.0001	0	dev_perf	0	0.5	0.000001	0.25	False	400000	32	1	24	24	0	0	24	False	1111	True	False	1	False	False	True	4000	12000	False		False	False	0	-1	0	-1
reverse	4	4	64	128	128	256	0.1	0	normal	normal	0.1	0.01	0.02	0.01	adam	0.0001	0	dev_perf	0	0.5	0.000001	0.25	False	400000	32	1	24	24	0	0	24	False	1113	True	False	1	False	False	True	4000	12000	False		False	False	0	-1	0	-1
retrieval	6	4	32	64	64	128	0.1	0	normal	normal	0.1	0.01	0.02	0.01	adam	0.0001	0	dev_perf	0	0.5	0.000001	0.25	False	1000000	32	1	3	3	0	0	3	False	2050	True	False	1	False	False	True	200	12000	False		False	False	0	-1	0	-1
retrieval	6	4	32	64	64	128	0.1	0	normal	normal	0.1	0.01	0.02	0.01	adam	0.0001	0	dev_perf	0	0.5	0.000001	0.25	False	1000000	32	1	3	3	0	0	3	False	2049	True	False	1	False	False	True	200	12000	False		False	False	0	-1	0	-1
retrieval	6	4	32	64	64	128	0.1	0	normal	normal	0.1	0.01	0.02	0.01	adam	0.0001	0	dev_perf	0	0.5	0.000001	0.25	False	1000000	32	1	3	3	0	0	3	False	1111	True	False	1	False	False	True	200	12000	False		False	False	0	-1	0	-1
retrieval	6	4	32	64	64	128	0.1	0	normal	normal	0.1	0.01	0.02	0.01	adam	0.0001	0	dev_perf	0	0.5	0.000001	0.25	False	1000000	32	1	5	5	0	0	5	False	1111	True	False	1	False	False	True	1000	12000	False		False	False	0	-1	0	-1
retrieval	6	4	32	64	64	128	0.1	0	normal	normal	0.1	0.01	0.02	0.01	adam	0.0001	0	dev_perf	0	0.3	0.000001	0.25	False	700000	32	1	5	5	0	0	5	False	1111	True	False	1	False	False	True	1000	12000	False		False	False	0	-1	0	-1
retrieval	6	4	32	64	64	128	0.1	0	normal	normal	0.1	0.01	0.02	0.01	adam	0.0001	0	dev_perf	0	0.5	0.000001	0.25	False	1000000	32	1	5	5	0	0	5	False	1113	True	False	1	False	False	True	1000	12000	False		False	False	0	-1	0	-1
retrieval	6	4	32	64	64	128	0.1	0	normal	normal	0.1	0.01	0.02	0.01	adam	0.0001	0	dev_perf	0	0.5	0.000001	0.25	False	1000000	32	1	5	5	0	0	0	False	1345	True	False	1	False	False	True	1000	12000	False		False	False	0	-1	0	-1
retrieval	6	4	32	64	64	128	0.1	0	normal	normal	0.1	0.01	0.02	0.01	adam	0.0001	0	dev_perf	0	0.5	0.000001	0.25	False	1000000	32	1	4	4	0	4	0	False	1236	True	False	1	False	False	True	200	12000	False		False	False	0	-1	0	-1
retrieval	6	4	32	64	64	128	0.1	0	normal	normal	0.1	0.01	0.02	0.01	adam	0.0001	0	dev_perf	0	0.5	0.000001	0.25	False	1000000	32	1	4	4	0	4	0	False	1111	True	False	1	False	False	True	200	12000	False		False	False	0	-1	0	-1
retrieval	6	4	32	64	64	128	0.1	0	normal	normal	0.1	0.01	0.02	0.01	adam	0.0001	0	dev_perf	0	0.5	0.000001	0.25	False	1000000	32	1	4	4	0	4	0	False	1235	True	False	1	False	False	True	200	12000	False		False	False	0	-1	0	-1
retrieval	6	4	32	64	64	128	0.1	0	normal	normal	0.1	0.01	0.02	0.01	adam	0.0001	0	dev_perf	0	0.5	0.000001	0.25	False	1000000	32	1	4	4	0	0	4	False	1235	True	False	1	False	False	True	200	12000	False		False	False	0	-1	0	-1
retrieval	6	4	32	64	64	128	0.1	0	normal	normal	0.1	0.01	0.02	0.01	adam	0.0001	0	dev_perf	0	0.5	0.000001	0.25	False	1000000	32	1	4	4	0	0	4	False	1236	True	False	1	False	False	True	200	12000	False		False	False	0	-1	0	-1
retrieval	6	4	32	64	64	128	0.1	0	normal	normal	0.1	0.01	0.02	0.01	adam	0.0001	0	dev_perf	0	0.5	0.000001	0.25	False	1000000	32	1	4	4	0	0	4	False	1111	True	False	1	False	False	True	200	12000	False		False	False	0	-1	0	-1
retrieval	6	4	32	64	64	128	0.1	0	normal	normal	0.1	0.01	0.02	0.01	adam	0.0001	0	dev_perf	0	0.5	0.000001	0.25	False	1000000	32	1	3	3	0	3	0	False	1111	True	False	1	False	False	True	200	12000	False		False	False	0	-1	0	-1
retrieval	6	4	32	64	64	128	0.1	0	normal	normal	0.1	0.01	0.02	0.01	adam	0.0001	0	dev_perf	0	0.5	0.000001	0.25	False	1000000	32	1	3	3	0	3	0	False	2050	True	False	1	False	False	True	200	12000	False		False	False	0	-1	0	-1
retrieval	6	4	32	64	64	128	0.1	0	normal	normal	0.1	0.01	0.02	0.01	adam	0.0001	0	dev_perf	0	0.5	0.000001	0.25	False	1000000	32	1	3	3	0	3	0	False	2049	True	False	1	False	False	True	200	12000	False		False	False	0	-1	0	-1
retrieval	6	4	32	64	64	128	0.1	0	normal	normal	0.1	0.01	0.02	0.01	adam	0.0001	0	dev_perf	0	0.5	0.000001	0.25	False	1000000	32	1	4	4	0	0	0	False	1345	True	False	1	False	False	True	1000	12000	False		False	False	0	-1	0	-1
retrieval	6	4	32	64	64	128	0.1	0	normal	normal	0.1	0.01	0.02	0.01	adam	0.0001	0	dev_perf	0	0.5	0.000001	0.25	False	1000000	32	1	3	3	0	0	0	False	1345	True	False	1	False	False	True	1000	12000	False		False	False	0	-1	0	-1
retrieval	6	4	32	64	64	128	0.1	0	normal	normal	0.1	0.01	0.02	0.01	adam	0.0001	0	dev_perf	0	0.5	0.000001	0.25	False	1000000	32	1	2	2	0	0	2	False	1122	True	False	1	False	False	True	1000	12000	False		False	False	0	-1	0	-1
retrieval	6	4	32	64	64	128	0.1	0	normal	normal	0.1	0.01	0.02	0.01	adam	0.0001	0	dev_perf	0	0.5	0.000001	0.25	False	1000000	32	1	2	2	0	0	2	False	1111	True	False	1	False	False	True	1000	12000	False		False	False	0	-1	0	-1
retrieval	6	4	32	64	64	128	0.1	0	normal	normal	0.1	0.01	0.02	0.01	adam	0.0001	0	dev_perf	0	0.5	0.000001	0.25	False	1000000	32	1	2	2	0	0	2	False	1133	True	False	1	False	False	True	1000	12000	False		False	False	0	-1	0	-1
retrieval	6	4	32	64	64	128	0.1	0	normal	normal	0.1	0.01	0.02	0.01	adam	0.0001	0	dev_perf	0	0.5	0.000001	0.25	False	400000	32	1	10	10	0	0	0	False	1345	True	False	1	False	False	True	1000	12000	False		False	False	0	-1	0	-1
retrieval	6	4	32	64	64	128	0.1	0	normal	normal	0.1	0.01	0.02	0.01	adam	0.0001	0	dev_perf	0	0.5	0.000001	0.25	False	400000	32	1	10	10	0	0	0	False	1346	True	False	1	False	False	True	1000	12000	False		False	False	0	-1	0	-1
retrieval	6	4	32	64	64	128	0.1	0	normal	normal	0.1	0.01	0.02	0.01	adam	0.0001	0	dev_perf	0	0.5	0.000001	0.25	False	1000000	32	1	2	2	0	2	0	False	1122	True	False	1	False	False	True	1000	12000	False		False	False	0	-1	0	-1
retrieval	6	4	32	64	64	128	0.1	0	normal	normal	0.1	0.01	0.02	0.01	adam	0.0001	0	dev_perf	0	0.5	0.000001	0.25	False	1000000	32	1	2	2	0	2	0	False	1111	True	False	1	False	False	True	1000	12000	False		False	False	0	-1	0	-1
retrieval	6	4	32	64	64	128	0.1	0	normal	normal	0.1	0.01	0.02	0.01	adam	0.0001	0	dev_perf	0	0.5	0.000001	0.25	False	1000000	32	1	2	2	0	2	0	False	1133	True	False	1	False	False	True	1000	12000	False		False	False	0	-1	0	-1
retrieval	6	4	32	64	64	128	0.1	0	normal	normal	0.1	0.01	0.02	0.01	adam	0.0001	0	dev_perf	0	0.5	0.000001	0.25	False	1000000	32	1	5	5	0	0	5	False	1112	True	False	1	False	False	True	1000	12000	False		False	False	0	-1	0	-1
retrieval	6	4	32	64	64	128	0.1	0	normal	normal	0.1	0.01	0.02	0.01	adam	0.0001	0	dev_perf	0	0.5	0.000001	0.25	False	1000000	32	1	5	5	0	5	0	False	1113	True	False	1	False	False	True	1000	12000	False		False	False	0	-1	0	-1
retrieval	6	4	32	64	64	128	0.1	0	normal	normal	0.1	0.01	0.02	0.01	adam	0.0001	0	dev_perf	0	0.5	0.000001	0.25	False	1000000	32	1	5	5	0	5	0	False	1112	True	False	1	False	False	True	1000	12000	False		False	False	0	-1	0	-1
retrieval	6	4	32	64	64	128	0.1	0	normal	normal	0.1	0.01	0.02	0.01	adam	0.0001	0	dev_perf	0	0.5	0.000001	0.25	False	1000000	32	1	5	5	0	5	0	False	1111	True	False	1	False	False	True	1000	12000	False		False	False	0	-1	0	-1
retrieval	6	4	32	64	64	128	0.1	0	normal	normal	0.1	0.01	0.02	0.01	adam	0.0001	0	dev_perf	0	0.5	0.000001	0.25	False	1000000	32	1	2	2	0	0	0	False	1345	True	False	1	False	False	True	1000	12000	False		False	False	0	-1	0	-1
retrieval	6	4	32	64	64	128	0.1	0	normal	normal	0.1	0.01	0.02	0.01	adam	0.0001	0	dev_perf	0	0.5	0.000001	0.25	False	1000000	32	1	2	2	0	2	0	False	1122	True	False	1	False	False	True	1000	12000	False		False	False	0	-1	0	-1
retrieval	6	4	32	64	64	128	0.1	0	normal	normal	0.1	0.01	0.02	0.01	adam	0.0001	0	dev_perf	0	0.5	0.000001	0.25	False	1000000	32	1	2	2	0	2	0	False	1111	True	False	1	False	False	True	1000	12000	False		False	False	0	-1	0	-1
retrieval	6	4	32	64	64	128	0.1	0	normal	normal	0.1	0.01	0.02	0.01	adam	0.0001	0	dev_perf	0	0.5	0.000001	0.25	False	1000000	32	1	2	2	0	2	0	False	1133	True	False	1	False	False	True	1000	12000	False		False	False	0	-1	0	-1
retrieval	6	4	32	64	64	128	0.1	0	normal	normal	0.1	0.01	0.02	0.01	adam	0.0001	0	dev_perf	0	0.5	0.000001	0.25	False	1000000	32	1	2	2	0	2	0	False	1111	True	False	1	False	False	True	1000	12000	False		False	False	0	-1	0	-1
retrieval	6	4	32	64	64	128	0.1	0	normal	normal	0.1	0.01	0.02	0.01	adam	0.0001	0	dev_perf	0	0.5	0.000001	0.25	False	1000000	32	1	2	2	0	0	0	False	1345	True	False	1	False	False	True	1000	12000	False		False	False	0	-1	0	-1
retrieval	6	4	32	64	64	128	0.1	0	normal	normal	0.1	0.01	0.02	0.01	adam	0.0001	0	dev_perf	0	0.5	0.000001	0.25	False	1000000	32	1	2	2	0	0	2	False	1111	True	False	1	False	False	True	4000	12000	False		False	False	0	-1	0	-1
retrieval	6	4	32	64	64	128	0.1	0	normal	normal	0.1	0.01	0.02	0.01	adam	0.0001	0	dev_perf	0	0.5	0.000001	0.25	False	1000000	32	1	2	2	0	0	2	False	1112	True	False	1	False	False	True	4000	12000	False		False	False	0	-1	0	-1
retrieval	6	4	32	64	64	128	0.1	0	normal	normal	0.1	0.01	0.02	0.01	adam	0.0001	0	dev_perf	0	0.5	0.000001	0.25	False	1000000	32	1	2	2	0	0	2	False	1113	True	False	1	False	False	True	4000	12000	False		False	False	0	-1	0	-1
retrieval	6	4	32	64	64	128	0.1	0	normal	normal	0.1	0.01	0.02	0.01	adam	0.0001	0	dev_perf	0	0.5	0.000001	0.25	False	1000000	32	1	3	3	0	0	3	False	1111	True	False	1	False	False	True	4000	12000	False		False	False	0	-1	0	-1
retrieval	6	4	32	64	64	128	0.1	0	normal	normal	0.1	0.01	0.02	0.01	adam	0.0001	0	dev_perf	0	0.5	0.000001	0.25	False	1000000	32	1	3	3	0	0	3	False	1112	True	False	1	False	False	True	4000	12000	False		False	False	0	-1	0	-1
retrieval	6	4	32	64	64	128	0.1	0	normal	normal	0.1	0.01	0.02	0.01	adam	0.0001	0	dev_perf	0	0.5	0.000001	0.25	False	1000000	32	1	3	3	0	0	3	False	1113	True	False	1	False	False	True	4000	12000	False		False	False	0	-1	0	-1
retrieval	6	4	32	64	64	128	0.1	0	normal	normal	0.1	0.01	0.02	0.01	adam	0.0001	0	dev_perf	0	0.5	0.000001	0.25	False	1000000	32	1	5	5	0	0	5	False	1111	True	False	1	False	False	True	4000	12000	False		False	False	0	-1	0	-1
retrieval	6	4	32	64	64	128	0.1	0	normal	normal	0.1	0.01	0.02	0.01	adam	0.0001	0	dev_perf	0	0.5	0.000001	0.25	False	1000000	32	1	5	5	0	0	5	False	1112	True	False	1	False	False	True	4000	12000	False		False	False	0	-1	0	-1
retrieval	6	4	32	64	64	128	0.1	0	normal	normal	0.1	0.01	0.02	0.01	adam	0.0001	0	dev_perf	0	0.5	0.000001	0.25	False	1000000	32	1	5	5	0	0	5	False	1113	True	False	1	False	False	True	4000	12000	False		False	False	0	-1	0	-1
retrieval	6	4	32	64	64	128	0.1	0	normal	normal	0.1	0.01	0.02	0.01	adam	0.0001	0	dev_perf	0	0.5	0.000001	0.25	False	1000000	32	1	2	2	0	0	2	False	1111	True	False	1	False	False	True	4000	12000	False		False	False	0	-1	0	-1
retrieval	6	4	32	64	64	128	0.1	0	normal	normal	0.1	0.01	0.02	0.01	adam	0.0001	0	dev_perf	0	0.5	0.000001	0.25	False	1000000	32	1	2	2	0	0	2	False	1112	True	False	1	False	False	True	4000	12000	False		False	False	0	-1	0	-1
retrieval	6	4	32	64	64	128	0.1	0	normal	normal	0.1	0.01	0.02	0.01	adam	0.0001	0	dev_perf	0	0.5	0.000001	0.25	False	1000000	32	1	2	2	0	0	2	False	1113	True	False	1	False	False	True	4000	12000	False		False	False	0	-1	0	-1
retrieval	6	4	32	64	64	128	0.1	0	normal	normal	0.1	0.01	0.02	0.01	adam	0.0001	0	dev_perf	0	0.5	0.000001	0.25	False	1000000	32	1	3	3	0	0	3	False	1111	True	False	1	False	False	True	4000	12000	False		False	False	0	-1	0	-1
retrieval	6	4	32	64	64	128	0.1	0	normal	normal	0.1	0.01	0.02	0.01	adam	0.0001	0	dev_perf	0	0.5	0.000001	0.25	False	1000000	32	1	3	3	0	0	3	False	1112	True	False	1	False	False	True	4000	12000	False		False	False	0	-1	0	-1
retrieval	6	4	32	64	64	128	0.1	0	normal	normal	0.1	0.01	0.02	0.01	adam	0.0001	0	dev_perf	0	0.5	0.000001	0.25	False	1000000	32	1	3	3	0	0	3	False	1113	True	False	1	False	False	True	4000	12000	False		False	False	0	-1	0	-1
[truncated: 21 more columns]
