# Supplementary material
Source: ML conference proceedings conference paper supplement (https://proceedings.neurips.cc/paper_files/paper/2022/hash/47e288629a6996a17ce50b90a056a0e1-Abstract.html)
Supplement: Supplementary file 1 [file 47e288629a6996a17ce50b90a056a0e1-Supplemental-Conference.zip › RMT_supp/transformer-xl-memory_experiments/interpret_logs.ipynb]

# %% [code]
import pandas as pd
import os
import matplotlib.pyplot as plt

# %% [code]
# path = '/home/ayd98/Desktop/MIPT/TXL/logs/wt103/'
path = '/home/ayd98/Desktop/MIPT/TXL/logs/enwik8/'
names = next(os.walk(path))[2]

# %% [code]
def load_preproc_df(path):
    df = pd.read_csv(path, error_bad_lines=False, skiprows=70, sep='|', names = ['1', 'ep_step', 'batches', 'lr', 'ms_batch', 'loss', 'bpc'])
    df = df[df.columns[1:]].dropna()
    df.lr = df.lr.apply(lambda x: float(x[3:]))
    df.ms_batch = df.ms_batch.apply(lambda x: float(x[10:]))
    df.loss = df.loss.apply(lambda x: float(x[6:]))
    df.bpc = df.bpc.apply(lambda x: float(x[5:]))
    return df

# %% [code]
dfs = []
for n in names:
    df_ = load_preproc_df(path+n)
    dfs.append(df_)

# %% [code]
names

# %% [code]
dfs[2]

# %% [code]
fig, axs = plt.subplots(2, 1, figsize=(20, 20))
fs = 20

for df in dfs:
    axs[0].plot(df.loss)
    axs[1].plot(df.bpc)


legend = [n[:-7] for n in names]

axs[0].set_title('Loss', fontsize=fs)
axs[0].set_xlabel('batch num', fontsize=fs)
axs[0].legend(legend, fontsize=16)

axs[1].set_title('bpc', fontsize=fs)
axs[1].set_xlabel('batch num', fontsize=fs)
# axs[1].set_ylim(0, 200)
axs[1].set_ylim(0.5, 2)
axs[1].legend(legend, fontsize=16)

plt.savefig('g.png', format='png')
plt.show()


# %% [code]
# fig, axs = plt.subplots(1, 2, figsize=(30,8))
# fs = 20

# axs[0].plot(df.loss.values)
# axs[0].set_title('Loss', fontsize=fs)
# axs[0].set_xlabel('batch num', fontsize=fs)
# axs[1].plot(df.bpc.values)
# axs[1].set_title('bpc', fontsize=fs)
# axs[1].set_xlabel('batch num', fontsize=fs)
# plt.show()


# %% [code]
!ls ~/Desktop/MIPT/TXL/remote_logs

# %% [code]


# %% [code]
