# Supplementary material
Source: ML conference proceedings conference paper supplement (https://proceedings.neurips.cc/paper_files/paper/2022/hash/47e288629a6996a17ce50b90a056a0e1-Abstract.html)
Supplement: Supplementary file 1 [file 47e288629a6996a17ce50b90a056a0e1-Supplemental-Conference.zip › RMT_supp/transformer-xl-memory_experiments/pytorch/eval.py]

# coding: utf-8
import argparse
import time
import math
import os, sys

import torch

from data_utils import get_lm_corpus
from mem_transformer import MemTransformerLM
from utils.exp_utils import get_logger

parser = argparse.ArgumentParser(description='PyTorch Transformer Language Model')
parser.add_argument('--data', type=str, default='../data/wikitext-103',
                    help='location of the data corpus')
parser.add_argument('--dataset', type=str, default='wt103',
                    choices=['wt103', 'lm1b', 'enwik8', 'text8'],
                    help='dataset name')
parser.add_argument('--split', type=str, default='all',
                    choices=['all', 'valid', 'test'],
                    help='which split to evaluate')
parser.add_argument('--batch_size', type=int, default=10,
                    help='batch size')
parser.add_argument('--tgt_len', type=int, default=5,
                    help='number of tokens to predict')
parser.add_argument('--ext_len', type=int, default=0,
                    help='length of the extended context')
parser.add_argument('--mem_len', type=int, default=0,
                    help='length of the retained previous heads')
parser.add_argument('--clamp_len', type=int, default=-1,
                    help='max positional embedding index')
parser.add_argument('--cuda', action='store_true',
                    help='use CUDA')
parser.add_argument('--work_dir', type=str, required=True,
                    help='path to the work_dir')
parser.add_argument('--no_log', action='store_true',
                    help='do not log the eval result')
parser.add_argument('--same_length', action='store_true',
                    help='set same length attention with masking')
args = parser.parse_args()
assert args.ext_len >= 0, 'extended context length must be non-negative'

device = torch.device("cuda" if args.cuda else "cpu")

# Get logger
logging = get_logger(os.path.join(args.work_dir, 'log.txt'),
                     log_=not args.no_log)

# Load dataset
corpus = get_lm_corpus(args.data, args.dataset)
ntokens = len(corpus.vocab)

va_iter = corpus.get_iterator('valid', args.batch_size, args.tgt_len,
    device=device, ext_len=args.ext_len)
te_iter = corpus.get_iterator('test', args.batch_size, args.tgt_len,
    device=device, ext_len=args.ext_len)

# Load the best saved model.
with open(os.path.join(args.work_dir, 'model.pt'), 'rb') as f:
    model = torch.load(f)
model.backward_compatible()
model = model.to(device)

logging('Evaluating with bsz {} tgt_len {} ext_len {} mem_len {} clamp_len {}'.format(
       args.batch_size, args.tgt_len, args.ext_len, args.mem_len, args.clamp_len))

model.reset_length(args.tgt_len, args.ext_len, args.mem_len)
if args.clamp_len > 0:
    model.clamp_len = args.clamp_len
if args.same_length:
    model.same_length = True

###############################################################################
# Evaluation code
###############################################################################
def evaluate(eval_iter):
    # Turn on evaluation mode which disables dropout.
    model.eval()
    total_len, total_loss = 0, 0.
    start_time = time.time()
    with torch.no_grad():
        mems = tuple()
        mem_tokens = None
        for idx, (data, target, seq_len) in enumerate(eval_iter):
            ret = model(data, target, *mems, mem_tokens=mem_tokens)
            if model.num_mem_tokens not in (0, None):
                mem_tokens, loss, mems = ret[0], ret[1], ret[2:]
            else:
                loss, mems = ret[0], ret[1:]
            loss = loss.mean()
            total_loss += seq_len * loss.item()
            total_len += seq_len
        total_time = time.time() - start_time
    logging('Time : {:.2f}s, {:.2f}ms/segment'.format(
            total_time, 1000 * total_time / (idx+1)))
    return total_loss / total_len

# Run on test data.
if args.split == 'all':
    test_loss = evaluate(te_iter)
    valid_loss = evaluate(va_iter)
elif args.split == 'valid':
    valid_loss = evaluate(va_iter)
    test_loss = None
elif args.split == 'test':
    test_loss = evaluate(te_iter)
    valid_loss = None

def format_log(loss, split):
    if args.dataset in ['enwik8', 'text8']:
        log_str = '| {0} loss {1:5.2f} | {0} bpc {2:9.5f} '.format(
            split, loss, loss / math.log(2))
    else:
        log_str = '| {0} loss {1:5.2f} | {0} ppl {2:9.3f} '.format(
            split, loss, math.exp(loss))
    return log_str

log_str = ''
if valid_loss is not None:
    log_str += format_log(valid_loss, 'valid')
if test_loss is not None:
    log_str += format_log(test_loss, 'test')

logging('=' * 100)
logging(log_str)
logging('=' * 100)
