# Supplementary material
Source: ML conference proceedings conference paper supplement (https://proceedings.neurips.cc/paper_files/paper/2022/hash/47e288629a6996a17ce50b90a056a0e1-Abstract.html)
Supplement: Supplementary file 1 [file 47e288629a6996a17ce50b90a056a0e1-Supplemental-Conference.zip › RMT_supp/transformer-xl-memory_experiments/pytorch/train_synthetic.py]

import argparse
from genericpath import exists
import time
import math
import os, sys
import itertools

import numpy as np

import torch
import torch.nn as nn
import torch.optim as optim

# from data_utils import get_lm_corpus
from experiment_utils.generate_data import data_loader
from mem_transformer import MemTransformerLM
from utils.exp_utils import create_exp_dir
from utils.data_parallel import BalancedDataParallel

datasets = ['reverse', 'copy', 'retrieval', 'retrieval59', 'retrieval59_ext', 'retrieval29_ext', 'copy120', 'reverse120']

parser = argparse.ArgumentParser(description='PyTorch Transformer Language Model')
parser.add_argument('--data', type=str, default='../data/wikitext-103',
                    help='location of the data corpus')
parser.add_argument('--dataset', type=str, default='reverse',
                    choices=datasets,
                    help='dataset name')
parser.add_argument('--n_layer', type=int, default=12,
                    help='number of total layers')
parser.add_argument('--n_head', type=int, default=10,
                    help='number of heads')
parser.add_argument('--d_head', type=int, default=50,
                    help='head dimension')
parser.add_argument('--d_embed', type=int, default=-1,
                    help='embedding dimension')
parser.add_argument('--d_model', type=int, default=500,
                    help='model dimension')
parser.add_argument('--d_inner', type=int, default=1000,
                    help='inner dimension in FF')
parser.add_argument('--dropout', type=float, default=0.0,
                    help='global dropout rate')
parser.add_argument('--dropatt', type=float, default=0.0,
                    help='attention probability dropout rate')
parser.add_argument('--init', default='normal', type=str,
                    help='parameter initializer to use.')
parser.add_argument('--emb_init', default='normal', type=str,
                    help='parameter initializer to use.')
parser.add_argument('--init_range', type=float, default=0.1,
                    help='parameters initialized by U(-init_range, init_range)')
parser.add_argument('--emb_init_range', type=float, default=0.01,
                    help='parameters initialized by U(-init_range, init_range)')
parser.add_argument('--init_std', type=float, default=0.02,
                    help='parameters initialized by N(0, init_std)')
parser.add_argument('--proj_init_std', type=float, default=0.01,
                    help='parameters initialized by N(0, init_std)')
parser.add_argument('--optim', default='adam', type=str,
                    choices=['adam', 'sgd', 'adagrad'],
                    help='optimizer to use.')
parser.add_argument('--lr', type=float, default=0.00025,
                    help='initial learning rate (0.00025|5 for adam|sgd)')
parser.add_argument('--mom', type=float, default=0.0,
                    help='momentum for sgd')
parser.add_argument('--scheduler', default='cosine', type=str,
                    choices=['cosine', 'inv_sqrt', 'dev_perf', 'constant'],
                    help='lr scheduler to use.')
parser.add_argument('--warmup_step', type=int, default=0,
                    help='upper epoch limit')
parser.add_argument('--decay_rate', type=float, default=0.5,
                    help='decay factor when ReduceLROnPlateau is used')
parser.add_argument('--lr_min', type=float, default=0.0,
                    help='minimum learning rate during annealing')
parser.add_argument('--clip', type=float, default=0.25,
                    help='gradient clipping')
parser.add_argument('--clip_nonemb', action='store_true',
                    help='only clip the gradient of non-embedding params')
parser.add_argument('--max_step', type=int, default=100000,
                    help='upper epoch limit')
parser.add_argument('--batch_size', type=int, default=60,
                    help='batch size')
parser.add_argument('--batch_chunk', type=int, default=1,
                    help='split batch into chunks to save memory')
parser.add_argument('--tgt_len', type=int, default=70,
                    help='number of tokens to predict')
parser.add_argument('--eval_tgt_len', type=int, default=50,
                    help='number of tokens to predict for evaluation')
parser.add_argument('--ext_len', type=int, default=0,
                    help='length of the extended context')
parser.add_argument('--mem_len', type=int, default=0,
                    help='length of the retained previous heads')
parser.add_argument('--num_mem_tokens', type=int, default=0,
                    help='number of memory tokens in work memory')
parser.add_argument('--not_tied', action='store_true',
                    help='do not tie the word embedding and softmax weights')
parser.add_argument('--seed', type=int, default=1111,
                    help='random seed')
parser.add_argument('--cuda', action='store_true',
                    help='use CUDA')
parser.add_argument('--adaptive', action='store_true',
                    help='use adaptive softmax')
parser.add_argument('--div_val', type=int, default=1,
                    help='divident value for adapative input and softmax')
parser.add_argument('--pre_lnorm', action='store_true',
                    help='apply LayerNorm to the input instead of the output')
parser.add_argument('--varlen', action='store_true',
                    help='use variable length')
parser.add_argument('--multi_gpu', action='store_true',
                    help='use multiple GPU')
parser.add_argument('--log-interval', type=int, default=200,
                    help='report interval')
parser.add_argument('--eval-interval', type=int, default=4000,
                    help='evaluation interval')
parser.add_argument('--work_dir', default='LM-TFM', type=str,
                    help='experiment directory.')
parser.add_argument('--restart', action='store_true',
                    help='restart training from the saved checkpoint')
parser.add_argument('--restart_dir', type=str, default='',
                    help='restart dir')
parser.add_argument('--debug', action='store_true',
                    help='run in debug mode (do not create exp dir)')
parser.add_argument('--same_length', action='store_true',
                    help='use the same attn length for all tokens')
parser.add_argument('--attn_type', type=int, default=0,
                    help='attention type. 0 for ours, 1 for Shaw et al,'
                    '2 for Vaswani et al, 3 for Al Rfou et al.')
parser.add_argument('--clamp_len', type=int, default=-1,
                    help='use the same pos embeddings after clamp_len')
parser.add_argument('--eta_min', type=float, default=0.0,
                    help='min learning rate for cosine scheduler')
parser.add_argument('--gpu0_bsz', type=int, default=-1,
                    help='batch size on gpu 0')
parser.add_argument('--max_eval_steps', type=int, default=-1,
                    help='max eval steps')
parser.add_argument('--sample_softmax', type=int, default=-1,
                    help='number of samples in sampled softmax')
parser.add_argument('--patience', type=int, default=0,
                    help='patience')
parser.add_argument('--finetune_v2', action='store_true',
                    help='finetune v2')
parser.add_argument('--finetune_v3', action='store_true',
                    help='finetune v3')
parser.add_argument('--fp16', action='store_true',
                    help='Run in pseudo-fp16 mode (fp16 storage fp32 math).')
parser.add_argument('--static-loss-scale', type=float, default=1,
                    help='Static loss scale, positive power of 2 values can '
                    'improve fp16 convergence.')
parser.add_argument('--dynamic-loss-scale', action='store_true',
                    help='Use dynamic loss scaling.  If supplied, this argument'
                    ' supersedes --static-loss-scale.')
parser.add_argument('--device_ids', nargs='+', default=None, help='Device ids for training.')
parser.add_argument('--mem_backprop_depth', type=int, default=0, 
                    help='How deep to pass gradient with memory tokens to past segments .')
parser.add_argument('--bptt_bp', action='store_true',
                    help='Backpropagate at each timestep during BPTT.')
parser.add_argument('--mem_at_end', action='store_true',
                    help='Whether to add mem tokens at the end of sequence.')
parser.add_argument('--read_mem_from_cache', action='store_true',
                    help='Mem tokens attend to their mem representations.')
parser.add_argument('--log_interval', type=int, default=200,
                    help='Log period in batches')
parser.add_argument('--eval_interval', type=int, default=8000,
                    help='Evaluation period in batches')
parser.add_argument('--answer_size', type=int, default=24,
                    help='How many last tokens in segment to use for loss.')

args = parser.parse_args()
args.tied = not args.not_tied

#########
if args.device_ids is not None:
    args.device_ids = [int(i) for i in args.device_ids]
    print(args.device_ids)

if args.d_embed < 0:
    args.d_embed = args.d_model

assert args.ext_len >= 0, 'extended context length must be non-negative'
assert args.batch_size % args.batch_chunk == 0

args.work_dir = '{}-{}'.format(args.work_dir, args.dataset)
args.work_dir = os.path.join(args.work_dir, time.strftime('%Y%m%d-%H%M%S'))
logging = create_exp_dir(args.work_dir,
    scripts_to_save=['train.py', 'mem_transformer.py', 'train_synthetic.py'], debug=args.debug)

# Set the random seed manually for reproducibility.
np.random.seed(args.seed)
torch.manual_seed(args.seed)
if torch.cuda.is_available():
    if not args.cuda:
        print('WARNING: You have a CUDA device, so you should probably run with --cuda')
    else:
        torch.cuda.manual_seed_all(args.seed)

# Validate `--fp16` option
if args.fp16:
    if not args.cuda:
        print('WARNING: --fp16 requires --cuda, ignoring --fp16 option')
        args.fp16 = False
    else:
        try:
            from apex.fp16_utils import FP16_Optimizer
        except:
            print('WARNING: apex not installed, ignoring --fp16 option')
            args.fp16 = False

device = torch.device('cuda' if args.cuda else 'cpu')
if args.cuda:
    device = torch.device(args.device_ids[0] if args.device_ids is not None else 0)

###############################################################################
# Load data
###############################################################################
# if args.dataset in {'reverse', 'copy', 'retrieval', 'retrieval59', 'retrieval59_ext', 'retrieval29_ext'}:
tr_iter = data_loader('train', path=args.data, task_name=args.dataset, batch_size=args.batch_size,
                                    tgt_len=args.tgt_len, device=device)
va_iter = data_loader('val', path=args.data, task_name=args.dataset, batch_size=args.batch_size,
                                    tgt_len=args.tgt_len, device=device)
te_iter = data_loader('test', path=args.data, task_name=args.dataset, batch_size=args.batch_size,
                                    tgt_len=args.tgt_len, device=device)
ntokens = args.ntokens = (tr_iter.src.max() + 1).item()

# # adaptive softmax / embedding
cutoffs, tie_projs = [], [False]
# if args.adaptive:
#     assert args.dataset in ['wt103', 'lm1b']
#     if args.dataset == 'wt103':
#         cutoffs = [20000, 40000, 200000]
#         tie_projs += [True] * len(cutoffs)
#     elif args.dataset == 'lm1b':
#         cutoffs = [60000, 100000, 640000]
#         tie_projs += [False] * len(cutoffs)

###############################################################################
# Build the model
###############################################################################
def init_weight(weight):
    if args.init == 'uniform':
        nn.init.uniform_(weight, -args.init_range, args.init_range)
    elif args.init == 'normal':
        nn.init.normal_(weight, 0.0, args.init_std)

def init_bias(bias):
    nn.init.constant_(bias, 0.0)

def weights_init(m):
    classname = m.__class__.__name__
    if classname.find('Linear') != -1:
        if hasattr(m, 'weight') and m.weight is not None:
            init_weight(m.weight)
        if hasattr(m, 'bias') and m.bias is not None:
            init_bias(m.bias)
    elif classname.find('AdaptiveEmbedding') != -1:
        if hasattr(m, 'n_emb_projs'):
            for i in range(m.n_emb_projs):
                if getattr(m, f'emb_projs_{i}') is not None:
                    nn.init.normal_(getattr(m, f'emb_projs_{i}'), 0.0, args.proj_init_std)
    elif classname.find('Embedding') != -1:
        if hasattr(m, 'weight'):
            init_weight(m.weight)
    elif classname.find('ProjectedAdaptiveLogSoftmax') != -1:
        if hasattr(m, 'cluster_weight') and m.cluster_weight is not None:
            init_weight(m.cluster_weight)
        if hasattr(m, 'cluster_bias') and m.cluster_bias is not None:
            init_bias(m.cluster_bias)
        if hasattr(m, 'n_out_projs'):
            for i in range(m.n_out_projs):
                if getattr(m, f'out_projs_{i}') is not None:
                    nn.init.normal_(getattr(m, f'out_projs_{i}'), 0.0, args.proj_init_std)
    elif classname.find('LayerNorm') != -1:
        if hasattr(m, 'weight'):
            nn.init.normal_(m.weight, 1.0, args.init_std)
        if hasattr(m, 'bias') and m.bias is not None:
            init_bias(m.bias)
    elif classname.find('TransformerLM') != -1:
        if hasattr(m, 'r_emb'):
            init_weight(m.r_emb)
        if hasattr(m, 'r_w_bias'):
            init_weight(m.r_w_bias)
        if hasattr(m, 'r_r_bias'):
            init_weight(m.r_r_bias)
        if hasattr(m, 'r_bias'):
            init_bias(m.r_bias)

def update_dropout(m):
    classname = m.__class__.__name__
    if classname.find('Dropout') != -1:
        if hasattr(m, 'p'):
            m.p = args.dropout

def update_dropatt(m):
    if hasattr(m, 'dropatt'):
        m.dropatt.p = args.dropatt

if args.restart:
    with open(os.path.join(args.restart_dir, 'model.pt'), 'rb') as f:
        model = torch.load(f)
    if not args.fp16:
        model = model.float()
    model.apply(update_dropout)
    model.apply(update_dropatt)
else:
    model = MemTransformerLM(ntokens, args.n_layer, args.n_head, args.d_model,
        args.d_head, args.d_inner, args.dropout, args.dropatt,
        tie_weight=args.tied, d_embed=args.d_embed, div_val=args.div_val,
        tie_projs=tie_projs, pre_lnorm=args.pre_lnorm, tgt_len=args.tgt_len,
        ext_len=args.ext_len, mem_len=args.mem_len, cutoffs=cutoffs,
        num_mem_tokens=args.num_mem_tokens, mem_at_end=args.mem_at_end, read_mem_from_cache=args.read_mem_from_cache, 
        same_length=args.same_length, attn_type=args.attn_type,
        clamp_len=args.clamp_len, sample_softmax=args.sample_softmax)
    model.apply(weights_init)
    model.word_emb.apply(weights_init) # ensure embedding init is not overridden by out_layer in case of weight sharing
args.n_all_param = sum([p.nelement() for p in model.parameters()])
args.n_nonemb_param = sum([p.nelement() for p in model.layers.parameters()])

if args.fp16:
    model = model.half()

if args.multi_gpu:
    model = model.to(device)
    if args.gpu0_bsz >= 0:
        para_model = BalancedDataParallel(args.gpu0_bsz // args.batch_chunk,
                                          model, dim=1, device_ids=args.device_ids, output_device=device)
    else:
        para_model = nn.DataParallel(model, device_ids=args.device_ids, dim=1, output_device=device)

    para_model.num_mem_tokens = para_model.module.num_mem_tokens
else:
    para_model = model.to(device)

#### optimizer
if args.optim.lower() == 'sgd':
    if args.sample_softmax > 0:
        dense_params, sparse_params = [], []
        for param in model.parameters():
            if param.size() == model.word_emb.weight.size():
                sparse_params.append(param)
            else:
                dense_params.append(param)
        optimizer_sparse = optim.SGD(sparse_params, lr=args.lr * 2)
        optimizer = optim.SGD(dense_params, lr=args.lr, momentum=args.mom)
    else:
        optimizer = optim.SGD(model.parameters(), lr=args.lr,
            momentum=args.mom)
elif args.optim.lower() == 'adam':
    if args.sample_softmax > 0:
        dense_params, sparse_params = [], []
        for param in model.parameters():
            if param.size() == model.word_emb.weight.size():
                sparse_params.append(param)
            else:
                dense_params.append(param)
        optimizer_sparse = optim.SparseAdam(sparse_params, lr=args.lr)
        optimizer = optim.Adam(dense_params, lr=args.lr)
    else:
        optimizer = optim.Adam(model.parameters(), lr=args.lr)
elif args.optim.lower() == 'adagrad':
    optimizer = optim.Adagrad(model.parameters(), lr=args.lr)

#### scheduler
if args.scheduler == 'cosine':
    # here we do not set eta_min to lr_min to be backward compatible
    # because in previous versions eta_min is default to 0
    # rather than the default value of lr_min 1e-6
    scheduler = optim.lr_scheduler.CosineAnnealingLR(optimizer,
        args.max_step, eta_min=args.eta_min) # should use eta_min arg
    if args.sample_softmax > 0:
        scheduler_sparse = optim.lr_scheduler.CosineAnnealingLR(optimizer_sparse,
            args.max_step, eta_min=args.eta_min) # should use eta_min arg
elif args.scheduler == 'inv_sqrt':
    # originally used for Transformer (in Attention is all you need)
    def lr_lambda(step):
        # return a multiplier instead of a learning rate
        if step == 0 and args.warmup_step == 0:
            return 1.
        else:
            return 1. / (step ** 0.5) if step > args.warmup_step \
                   else step / (args.warmup_step ** 1.5)
    scheduler = optim.lr_scheduler.LambdaLR(optimizer, lr_lambda=lr_lambda)
elif args.scheduler == 'dev_perf':
    scheduler = optim.lr_scheduler.ReduceLROnPlateau(optimizer,
        factor=args.decay_rate, patience=args.patience, min_lr=args.lr_min)
    if args.sample_softmax > 0:
        scheduler_sparse = optim.lr_scheduler.ReduceLROnPlateau(optimizer_sparse,
            factor=args.decay_rate, patience=args.patience, min_lr=args.lr_min)
elif args.scheduler == 'constant':
    pass

if args.cuda and args.fp16:
    # If args.dynamic_loss_scale is False, static_loss_scale will be used.
    # If args.dynamic_loss_scale is True, it will take precedence over static_loss_scale.
    optimizer = FP16_Optimizer(optimizer,
                               static_loss_scale = args.static_loss_scale,
                               dynamic_loss_scale = args.dynamic_loss_scale,
                               dynamic_loss_args = {'init_scale': 2 ** 16})

if args.restart:
    if os.path.exists(os.path.join(args.restart_dir, 'optimizer.pt')):
        with open(os.path.join(args.restart_dir, 'optimizer.pt'), 'rb') as f:
            opt_state_dict = torch.load(f)
            optimizer.load_state_dict(opt_state_dict)
    else:
        print('Optimizer was not saved. Start from scratch.')

logging('=' * 100)
for k, v in args.__dict__.items():
    logging('    - {} : {}'.format(k, v))
logging('=' * 100)
logging('#params = {}'.format(args.n_all_param))
logging('#non emb params = {}'.format(args.n_nonemb_param))

###############################################################################
# Training code
###############################################################################

def evaluate(eval_iter):
    # Turn on evaluation mode which disables dropout.
    model.eval()

    # If the model does not use memory at all, make the ext_len longer.
    # Otherwise, make the mem_len longer and keep the ext_len the same.
    if args.mem_len == 0:
        model.reset_length(args.eval_tgt_len,
            args.ext_len+args.tgt_len-args.eval_tgt_len, args.mem_len)
    else:
        model.reset_length(args.eval_tgt_len,
            args.ext_len, args.mem_len+args.tgt_len-args.eval_tgt_len)

    # Evaluation
    total_len, total_loss = 0, 0.
    num_correct, num_correct_tf, num_total = 0, 0, 0
    with torch.no_grad():
        mems = tuple()  
        for i, (data_, target_, seq_len) in enumerate(eval_iter):
            if data_.shape[1] < args.batch_size:
                print('maslina')
                continue
            if args.max_eval_steps > 0 and i >= args.max_eval_steps:
                break
            mem_tokens = None
            if model.mem_tokens is not None:
                mem_tokens = model.mem_tokens.repeat(1, data_.shape[1], 1)

            data_segs = torch.chunk(data_, data_.shape[0] // args.tgt_len)
            target_segs = torch.chunk(target_, target_.shape[0] // args.tgt_len)
#             print('data segs, ', [s.shape for s in data_segs])
            losses = []
        
        # caclulate loss
            for data, target in zip(data_segs, target_segs):
                if mems is None:
                    mems = tuple()
#                 print('Mems: ', [m.shape for m in mems])
#                 print('data, target', data.shape, target.shape)
                ret = para_model(data, target, *mems, mem_tokens=mem_tokens)
                if model.num_mem_tokens == 0:
                    loss, mems = ret[0], ret[1:]
                else:
                    mem_tokens, loss, mems = ret[0], ret[1], ret[2:]
                losses.append(loss)

            loss = torch.cat(losses)
            loss = loss[-args.answer_size:]
            loss = loss.mean()
            total_loss += args.answer_size * loss.float().item()
            total_len += args.answer_size

        # with teacher forcing
            mem_tokens = None
            if model.mem_tokens is not None:
                mem_tokens = model.mem_tokens.repeat(1, data_.shape[1], 1)

            pred_segs = []
            mems = tuple()    
            for data, target in zip(data_segs, target_segs):
                if mems is None:
                    mems = tuple()
                if not mems: mems = model.init_mems(data.device)

                tgt_len = target.size(0)
                hidden, mems = model._forward(data, mems=mems, mem_tokens=mem_tokens)
                num_mem = model.num_mem_tokens
                if model.num_mem_tokens > 0:
                    if model.mem_at_end:
                        pred_hid = hidden[-tgt_len - num_mem:-num_mem]
                        # mem_tokens_read = hidden[-tgt_len - 2*num_mem:-tgt_len - num_mem]
                        mem_tokens = hidden[-num_mem:]
                    else:
                        pred_hid = hidden[-tgt_len:]
                        mem_tokens = hidden[-tgt_len-num_mem:-tgt_len]
                else:
                    pred_hid = hidden[-tgt_len:]

                logit = model.crit._compute_logit(pred_hid, model.crit.out_layers[0].weight,
                                        model.crit.out_layers[0].bias, model.crit.out_projs_0)
                logit = torch.nn.functional.softmax(logit, dim=-1)
                preds = logit.argmax(dim=-1)
                pred_segs.append(preds)

            preds = torch.cat(pred_segs)
            num_total += args.batch_size * args.answer_size
            num_correct_tf += (preds[-args.answer_size:] == target_[-args.answer_size:]).float().sum().item()
            
            S, T, P = data_[:, -1].cpu().numpy(), target_[:, -1].cpu().numpy(), preds.cpu().numpy()

        # no teacher forcing
            if args.answer_size < args.tgt_len:
                continue
            mem_tokens, tmp_mem_tokens = None, None
            if model.mem_tokens is not None:
                mem_tokens = model.mem_tokens.repeat(1, data_.shape[1], 1)
            
#             if args.answer_size >= args.tgt_len:
            q_data, q_target = data_[:-args.answer_size].clone(), target_[:-args.answer_size].clone()
            a_data, a_target = data_[-args.answer_size:].clone(), target_[-args.answer_size:].clone()

            q_chunks = q_data.shape[0] // args.tgt_len
            a_chunks = max((a_data.shape[0] // args.tgt_len, 1))
            q_data_segs = torch.chunk(q_data, q_chunks)
            q_target_segs = torch.chunk(q_target, q_chunks)
            a_data_segs = torch.chunk(a_data, a_chunks)
            a_target_segs = torch.chunk(a_target, a_chunks)
            
            # data_src = data_.clone()
            # target_src = target_.clone()
            mems, tmp_mems = tuple(), tuple()
            for data, target in zip(q_data_segs, q_target_segs):
                if mems is None:
                    mems = tuple()
                if not mems: mems = model.init_mems(data.device)

                tgt_len = target.size(0)
                hidden, mems = model._forward(data, mems=mems, mem_tokens=mem_tokens)
                num_mem = model.num_mem_tokens
                if model.num_mem_tokens > 0:
                    if model.mem_at_end:
                        pred_hid = hidden[-tgt_len - num_mem:-num_mem]
                        # mem_tokens_read = hidden[-tgt_len - 2*num_mem:-tgt_len - num_mem]
                        mem_tokens = hidden[-num_mem:]
                    else:
                        pred_hid = hidden[-tgt_len:]
                        mem_tokens = hidden[-tgt_len-num_mem:-tgt_len]
            
            target_preds = list(q_target_segs)
            for data, target in zip(a_data_segs, a_target_segs):
                for token_ind in range(args.tgt_len):
                    if mems is None:
                        mems = tuple()
                    if not mems: mems = model.init_mems(data.device)

                    tgt_len = target.size(0)
                    tmp_mems = mems
                    hidden, tmp_mems = model._forward(data, mems=tmp_mems, mem_tokens=mem_tokens)
                    num_mem = model.num_mem_tokens
                    if model.num_mem_tokens > 0:
                        if model.mem_at_end:
                            pred_hid = hidden[-tgt_len - num_mem:-num_mem]
                            # mem_tokens_read = hidden[-tgt_len - 2*num_mem:-tgt_len - num_mem]
                            tmp_mem_tokens = hidden[-num_mem:]
                        else:
                            pred_hid = hidden[-tgt_len:]
                            tmp_mem_tokens = hidden[-tgt_len-num_mem:-tgt_len]
                    else:
                        pred_hid = hidden[-tgt_len:]

                    logit = model.crit._compute_logit(pred_hid, model.crit.out_layers[0].weight,
                                            model.crit.out_layers[0].bias, model.crit.out_projs_0)
                    logit = torch.nn.functional.softmax(logit[token_ind], dim=-1)
                    preds = logit.argmax(dim=1)
                    
                    target[token_ind] = preds
#                     if i==0:
#                         print('tgt', target[:, 0])
                    if token_ind < args.tgt_len - 1:
                        data[token_ind + 1] = preds

                mems = tmp_mems
                mem_tokens = tmp_mem_tokens
#                 if i==0:
#                     print('total target', target, '\n'*10)
                target_preds.append(target)

            target_preds = torch.cat(target_preds)
#             print('target_preds, target_', target_preds[-args.answer_size:] , target_[-args.answer_size:] )
            correct = (target_preds[-args.answer_size:] == target_[-args.answer_size:]).sum().item()
#             print(correct)
            num_correct += correct

    logging(f'|\nSource: {S}\nTarget: {T}\nTeacher forcing: acc:{num_correct_tf/num_total}\nPreds:  {P[:, -1]}\n')
    if args.answer_size >= args.tgt_len:
        logging(f'No teacher forcing: acc:{num_correct/num_total}\nPreds:  {target_preds[:, -1].cpu().numpy()}\n\n')
        accuracy = num_correct / num_total
    else:
        accuracy = num_correct_tf / num_total
        
    # Switch back to the training mode
    model.reset_length(args.tgt_len, args.ext_len, args.mem_len)
    model.train()
#     print('num_correct, num_total', num_correct, num_total)
    return total_loss / total_len, accuracy


def train():
    # Turn on training mode which enables dropout.
    global train_step, train_loss, best_val_loss, eval_start_time, log_start_time
    model.train()
    if args.batch_chunk > 1:
        mems = [tuple() for _ in range(args.batch_chunk)]
    else:
        mems = tuple()
    train_iter = tr_iter.get_varlen_iter() if args.varlen else tr_iter
    mem_tokens = None
    prev_data, prev_target, prev_mems, prev_mem_tokens = [], [], [], []
    for batch, (data_, target_, seq_len) in enumerate(train_iter):
        model.zero_grad()
        # if mem_tokens is not None:
        #     mem_tokens = mem_tokens.detach()
        # elif model.mem_tokens is not None:
        #     mem_tokens = model.mem_tokens.repeat(1, data_.shape[1], 1)
         
        if args.batch_chunk > 1:
            raise(NotImplementedError)
            # data_chunks = torch.chunk(data, args.batch_chunk, 1)
            # target_chunks = torch.chunk(target, args.batch_chunk, 1)
            # for i in range(args.batch_chunk):
            #     data_i = data_chunks[i].contiguous()
            #     target_i = target_chunks[i].contiguous()
            #     ret = para_model(data_i, target_i, *mems[i], mem_tokens=mem_tokens)
            #     if para_model.num_mem_tokens not in (0, None):
            #         mem_tokens, loss, mems[i] = ret[0], ret[1], ret[2:]
            #     else:
            #         loss, mems[i] = ret[0], ret[1:]
            #     loss = loss.float().mean().type_as(loss) / args.batch_chunk
            #     if args.fp16:
            #         optimizer.backward(loss)
            #     else:
            #         loss.backward()
            #     train_loss += loss.float().item()
        else:
            data_segs = torch.chunk(data_, data_.shape[0] // args.tgt_len)
            target_segs = torch.chunk(target_, target_.shape[0] // args.tgt_len)
#             print('data, target ', data_[:, 0], target_[:, 0])
            losses = []
            if model.mem_tokens is not None:
                mem_tokens = model.mem_tokens.repeat(1, data_.shape[1], 1)
            
            prev_data, prev_target, prev_mems, prev_mem_tokens = [], [], [], []
            for data, target in zip(data_segs, target_segs):
                if args.mem_backprop_depth > 0:
#                     raise(NotImplementedError)
                    prev_data = prev_data[-args.mem_backprop_depth:] + [data]
                    prev_target = prev_target[-args.mem_backprop_depth:] + [target]
                    prev_mems = prev_mems[-args.mem_backprop_depth:] + [mems]
                    prev_mem_tokens = prev_mem_tokens[-args.mem_backprop_depth:] + [mem_tokens.detach()]
#                     mem_tokens.values = prev_mem_tokens[0].clone()
                    mem_tokens = prev_mem_tokens[0]
                    for pd, pt, pm in zip(prev_data[:-1], prev_target[:-1], prev_mems[:-1]):
                        ret = para_model(pd, pt, *pm, mem_tokens=mem_tokens)
                        if model.num_mem_tokens == 0:
                            loss, mems = ret[0], ret[1:]
                        else:
                            mem_tokens, loss, mems = ret[0], ret[1], ret[2:]
                        if args.bptt_bp:
                            raise(NotImplementedError)
                
                ret = para_model(data, target, *mems, mem_tokens=mem_tokens)
                if model.num_mem_tokens == 0:
                    loss, mems = ret[0], ret[1:]
                else:
                    mem_tokens, loss, mems = ret[0], ret[1], ret[2:]
                losses.append(loss)

            loss = torch.cat(losses)
            loss = loss[-args.answer_size:]
            loss = loss.float().mean().type_as(loss)
            if args.fp16:
                optimizer.backward(loss)
            else:
                loss.backward()
#             print(loss.float().item())
            train_loss += loss.float().item()
            
        if args.fp16:
            optimizer.clip_master_grads(args.clip)
        else:
            torch.nn.utils.clip_grad_norm_(model.parameters(), args.clip)

        optimizer.step()
        if args.sample_softmax > 0:
            optimizer_sparse.step()
        
        # step-wise learning rate annealing
        train_step += 1
        if args.scheduler in ['cosine', 'constant', 'dev_perf']:
            # linear warmup stage
            if train_step < args.warmup_step:
                curr_lr = args.lr * train_step / args.warmup_step
                optimizer.param_groups[0]['lr'] = curr_lr
                if args.sample_softmax > 0:
                    optimizer_sparse.param_groups[0]['lr'] = curr_lr * 2
            else:
                if args.scheduler == 'cosine':
                    scheduler.step(train_step)
                    if args.sample_softmax > 0:
                        scheduler_sparse.step(train_step)
        elif args.scheduler == 'inv_sqrt':
            scheduler.step(train_step)

        if train_step % args.log_interval == 0:
            cur_loss = train_loss / args.log_interval
            elapsed = time.time() - log_start_time
            log_str = '| epoch {:3d} step {:>8d} | {:>6d} batches | lr {:.3g} ' \
                      '| ms/batch {:5.5f} | loss {:5.5f}'.format(
                epoch, train_step, batch+1, optimizer.param_groups[0]['lr'],
                elapsed * 1000 / args.log_interval, cur_loss)
            if args.dataset in ['enwik8', 'text8']:
                log_str += ' | bpc {:9.5f}'.format(cur_loss / math.log(2))
            else:
                log_str += ' | ppl {:9.3f}'.format(math.exp(cur_loss))
            logging(log_str)
            train_loss = 0
            log_start_time = time.time()

        if train_step % args.eval_interval == 0:
            val_loss, val_acc = evaluate(va_iter)
            logging('-' * 100)
            log_str = '| Eval {:3d} at step {:>8d} | time: {:5.2f}s ' \
                      '| valid loss {:5.5f}'.format(
                train_step // args.eval_interval, train_step,
                (time.time() - eval_start_time), val_loss)
            if args.dataset in ['enwik8', 'text8']:
                log_str += ' | bpc {:9.5f}'.format(val_loss / math.log(2))
            else:
                log_str += ' | valid ppl {:9.4f}'.format(math.exp(val_loss))
            log_str += ' | valid acc {}'.format(round(val_acc, 3))
            logging(log_str)
            logging('-' * 100)
            # Save the model if the validation loss is the best we've seen so far.
            if not best_val_loss or val_loss < best_val_loss:
                if not args.debug:
                    with open(os.path.join(args.work_dir, 'model.pt'), 'wb') as f:
                        torch.save(model, f)
                    with open(os.path.join(args.work_dir, 'optimizer.pt'), 'wb') as f:
                        torch.save(optimizer.state_dict(), f)
                best_val_loss = val_loss

            # dev-performance based learning rate annealing
            if args.scheduler == 'dev_perf':
                scheduler.step(val_loss)
                if args.sample_softmax > 0:
                    scheduler_sparse.step(val_loss)

            eval_start_time = time.time()

        if train_step == args.max_step:
            break

# Loop over epochs.
train_step = 0
train_loss = 0
best_val_loss = None

log_start_time = time.time()
eval_start_time = time.time()

# At any point you can hit Ctrl + C to break out of training early.
try:
    for epoch in itertools.count(start=1):
        train()
        if train_step == args.max_step:
            logging('-' * 100)
            logging('End of training')
            break
except KeyboardInterrupt:
    logging('-' * 100)
    logging('Exiting from training early')

# Load the best saved model.
with open(os.path.join(args.work_dir, 'model.pt'), 'rb') as f:
    model = torch.load(f)
para_model = model.to(device)

# Run on test data.
test_loss, test_acc = evaluate(te_iter)
logging('=' * 100)
if args.dataset in ['enwik8', 'text8']:
    logging('| End of training | test loss {:5.5f} | test bpc {:9.5f}'.format(
        test_loss, test_loss / math.log(2)))
else:
    logging('| End of training | test loss {:5.5f} | test ppl {:9.5f}'.format(
        test_loss, math.exp(test_loss)))
logging(' | test acc {}'.format(round(test_acc, 3)))
logging('=' * 100)
