# Supplementary material
Source: ML conference proceedings conference paper supplement (https://proceedings.neurips.cc/paper_files/paper/2022/hash/47e288629a6996a17ce50b90a056a0e1-Abstract.html)
Supplement: Supplementary file 1 [file 47e288629a6996a17ce50b90a056a0e1-Supplemental-Conference.zip › RMT_supp/transformer-xl-memory_experiments/pytorch/utils/log_uniform_sampler.py]

import torch
from torch import nn
import numpy as np

class LogUniformSampler(object):
    def __init__(self, range_max, n_sample):
        """
        Reference : https://github.com/tensorflow/tensorflow/blob/r1.10/tensorflow/python/ops/candidate_sampling_ops.py
            `P(class) = (log(class + 2) - log(class + 1)) / log(range_max + 1)`

        expected count can be approximated by 1 - (1 - p)^n
        and we use a numerically stable version -expm1(num_tries * log1p(-p))

        Our implementation fixes num_tries at 2 * n_sample, and the actual #samples will vary from run to run
        """
        with torch.no_grad():
            self.range_max = range_max
            log_indices = torch.arange(1., range_max+2., 1.).log_()
            self.dist = (log_indices[1:] - log_indices[:-1]) / log_indices[-1]
            # print('P', self.dist.numpy().tolist()[-30:])

            self.log_q = (- (-self.dist.double().log1p_() * 2 * n_sample).expm1_()).log_().float()

        self.n_sample = n_sample

    def sample(self, labels):
        """
            labels: [b1, b2]
        Return
            true_log_probs: [b1, b2]
            samp_log_probs: [n_sample]
            neg_samples: [n_sample]
        """

        # neg_samples = torch.empty(0).long()
        n_sample = self.n_sample
        n_tries = 2 * n_sample

        with torch.no_grad():
            neg_samples = torch.multinomial(self.dist, n_tries, replacement=True).unique()
            device = labels.device
            neg_samples = neg_samples.to(device)
            true_log_probs = self.log_q[labels].to(device)
            samp_log_probs = self.log_q[neg_samples].to(device)
            return true_log_probs, samp_log_probs, neg_samples

def sample_logits(embedding, bias, labels, inputs, sampler):
    """
        embedding: an nn.Embedding layer
        bias: [n_vocab]
        labels: [b1, b2]
        inputs: [b1, b2, n_emb]
        sampler: you may use a LogUniformSampler
    Return
        logits: [b1, b2, 1 + n_sample]
    """
    true_log_probs, samp_log_probs, neg_samples = sampler.sample(labels)
    n_sample = neg_samples.size(0)
    b1, b2 = labels.size(0), labels.size(1)
    all_ids = torch.cat([labels.view(-1), neg_samples])
    all_w = embedding(all_ids)
    true_w = all_w[: -n_sample].view(b1, b2, -1)
    sample_w = all_w[- n_sample:].view(n_sample, -1)

    all_b = bias[all_ids]
    true_b = all_b[: -n_sample].view(b1, b2)
    sample_b = all_b[- n_sample:]

    hit = (labels[:, :, None] == neg_samples).detach()

    true_logits = torch.einsum('ijk,ijk->ij',
        [true_w, inputs]) + true_b - true_log_probs
    sample_logits = torch.einsum('lk,ijk->ijl',
        [sample_w, inputs]) + sample_b - samp_log_probs
    sample_logits.masked_fill_(hit, -1e30)
    logits = torch.cat([true_logits[:, :, None], sample_logits], -1)

    return logits


# class LogUniformSampler(object):
#     def __init__(self, range_max, unique=False):
#         """
#         Reference : https://github.com/tensorflow/tensorflow/blob/r1.10/tensorflow/python/ops/candidate_sampling_ops.py
#             `P(class) = (log(class + 2) - log(class + 1)) / log(range_max + 1)`
#         """
#         self.range_max = range_max
#         log_indices = torch.arange(1., range_max+2., 1.).log_()
#         self.dist = (log_indices[1:] - log_indices[:-1]) / log_indices[-1]

#         self.unique = unique

#         if self.unique:
#             self.exclude_mask = torch.ByteTensor(range_max).fill_(0)

#     def sample(self, n_sample, labels):
#         pos_sample, new_labels = labels.unique(return_inverse=True)
#         n_pos_sample = pos_sample.size(0)
#         n_neg_sample = n_sample - n_pos_sample

#         if self.unique:
#             self.exclude_mask.index_fill_(0, pos_sample, 1)
#             sample_dist = self.dist.clone().masked_fill_(self.exclude_mask, 0)
#             self.exclude_mask.index_fill_(0, pos_sample, 0)
#         else:
#             sample_dist = self.dist

#         neg_sample = torch.multinomial(sample_dist, n_neg_sample)

#         sample = torch.cat([pos_sample, neg_sample])
#         sample_prob = self.dist[sample]

#         return new_labels, sample, sample_prob


if __name__ == '__main__':
    S, B = 3, 4
    n_vocab = 10000
    n_sample = 5
    H = 32

    labels = torch.LongTensor(S, B).random_(0, n_vocab)

    # sampler = LogUniformSampler(n_vocab, unique=False)
    # new_labels, sample, sample_prob = sampler.sample(n_sample, labels)

    sampler = LogUniformSampler(n_vocab, unique=True)
    # true_probs, samp_probs, neg_samples = sampler.sample(n_sample, labels)

    # print('true_probs', true_probs.numpy().tolist())
    # print('samp_probs', samp_probs.numpy().tolist())
    # print('neg_samples', neg_samples.numpy().tolist())

    # print('sum', torch.sum(sampler.dist).item())

    # assert torch.all(torch.sort(sample.unique())[0].eq(torch.sort(sample)[0])).item()

    embedding = nn.Embedding(n_vocab, H)
    bias = torch.zeros(n_vocab)
    inputs = torch.Tensor(S, B, H).normal_()

    logits, out_labels = sample_logits(embedding, bias, labels, inputs, sampler, n_sample)
    print('logits', logits.detach().numpy().tolist())
    print('logits shape', logits.size())
    print('out_labels', out_labels.detach().numpy().tolist())
    print('out_labels shape', out_labels.size())
