# Supplementary material
Source: ML conference proceedings conference paper supplement (https://proceedings.neurips.cc/paper_files/paper/2022/hash/47e288629a6996a17ce50b90a056a0e1-Abstract.html)
Supplement: Supplementary file 1 [file 47e288629a6996a17ce50b90a056a0e1-Supplemental-Conference.zip › RMT_supp/transformer-xl-memory_experiments/tests.ipynb]

# %% [code]
# ssh gpu6 "source bulatov/memexp_env/bin/activate; cd bulatov/TXL/pytorch; bash run_wt103_base_memtrans_1by1.sh train --work_dir test_1by1 --device_ids 4 5 6 7 --data ~/bulatov/TXL/data/wt103"

# %% [code]
x = torch.tensor([1.], requires_grad=True)
x.grad = torch.tensor([1.])

# %% [code]
x.grad

# %% [code]
l = x*2

# %% [code]


# %% [code]
torch.stack([torch.zeros(5, 4), torch.zeros(5, 4)]).sum(dim=0)

# %% [code]
l = torch.nn.functional.log_softmax(x, 2*x)

# %% [code]
print(l(x, x*2))
x.grad

# %% [code]
l.backward()
x.grad

# %% [code]
l.grad

# %% [code]
# bash run_wt103_base.sh train --work_dir WORK_DIR --device_ids 0 1 --data PATH_TO_DATA --mem_len 0

# %% [code]
# with open('/home/ayd98/Desktop/MIPT/TXL/data/enwik8/train.txt', 'r') as f:
#     res = f.read()

# %% [code]
# import re
# re.sub(' +', ' ', 'The     quick brown    fox')
# res[:100]

# %% [code]
# res = list(res)
# res = [s if s != ' ' else '\spce' for s in res]
# res = ' '.join(res)

# %% [code]
# l = len(res)
# train = res[:int(0.9*l)]
# test = res[int(0.9*l):int(0.95*l)]
# val = res[int(0.95*l):]

# %% [code]
# for var, name in zip([train, test, val], ['train', 'test', 'valid']):
#     with open(f'/home/ayd98/Desktop/MIPT/TXL/data/enwik8/{name}.txt', 'w') as f:
#         f.write(var)

# %% [code]
# DATA_DIR=${DATA_ROOT}/pretrained_xl/tf_enwik8/data
# MODEL_DIR=${DATA_ROOT}/pretrained_xl/tf_enwik8/model

# # Model
# N_LAYER=24
# D_MODEL=1024
# D_EMBED=1024
# N_HEAD=8
# D_HEAD=128
# D_INNER=3072

# # Testing
# TEST_TGT_LEN=128
# TEST_MEM_LEN=3800
# TEST_CLAMP_LEN=1000

# TEST_CKPT_PATH=${MODEL_DIR}/model.ckpt-0
# TEST_BSZ=16
# TEST_NUM_CORE=2


# python data_utils.py \
#   --data_dir=$'data/enwik8' \
#   --dataset=enwik8 \
#   --tgt_len=${TEST_TGT_LEN} \
#   --per_host_test_bsz=${TEST_BSZ} \
#   --num_passes=1 \
#   --use_tpu=False

# %% [code]
# import torchtext.datasets as datasets

# sets = datasets.WikiText103(root='data/wt103', split=('train', 'valid', 'test'))

# gen = sets[0]
# with open('data/wt103/train.txt', 'w') as f:
#     for i, t in enumerate(gen):
#         f.write(t)

# gen = sets[1]
# with open('data/wt103/valid.txt', 'w') as f:
#     for i, t in enumerate(gen):
#         f.write(t)

# gen = sets[2]
# with open('data/wt103/test.txt', 'w') as f:
#     for i, t in enumerate(gen):
#         f.write(t)

# %% [code]
1 - int(True)

# %% [code]
mask = torch.triu(torch.ones(6,8)*2, diagonal=3)
mask[2+1:, 2+1:] = 1
mask

# %% [code]
(torch.ones(2) * 2 ).bool()

# %% [code]
import numpy as np
import time
import torch
import torch
import sys
sys.path.append('pytorch')
sys.path.append('pytorch/utils')

from pytorch.mem_transformer import *
from pytorch import data_utils

from experiment_utils.run_experiment import *
from experiment_utils.generate_data import *

# %% [markdown]
## Variables

# %% [code]
from sklearn.model_selection import ParameterGrid

TAG = '10tkn_len24_ext'

TASK_NAME = 'copy'
TRAIN_SIZE = 1000
VAL_SIZE = 200
TEST_SIZE = 100
NUM_INITS = 1


NUM_BATCHES = int(4e5)
BATCH_SIZE = 128
GENERATE_EVERY  = 10000
NUM_TOKENS = 10 + 2
ENC_SEQ_LEN = 24
DEC_SEQ_LEN = 48

INPUT_LEN = 24

# %% [markdown]
#### Generate data

# %% [code]
# # !mkdir data24
# np.random.seed(42)

# generator = copy_generator(batch_size=BATCH_SIZE, enc_seq_len=ENC_SEQ_LEN, dec_seq_len=DEC_SEQ_LEN, num_tokens=NUM_TOKENS)
# generate_data(generator, path=f'data{INPUT_LEN}', task_name=TASK_NAME, train_size=TRAIN_SIZE, test_size=TEST_SIZE, val_size=VAL_SIZE, batch_size=BATCH_SIZE)  

# %% [code]
class data_loader:
    def __init__(self, task_name, path='data', batch_size=32, none_mask=True):
        self.X, self.y = np.load(f'{path}/{task_name}_X.npy'), np.load(f'{path}/{task_name}_y.npy')
        self.data_size = self.X.shape[0]
        self.data_ptr = 0

        if none_mask:
            self.src_mask, self.tgt_mask = None, None
        else:
            self.src_masks, self.tgt_mask = np.load(f'{path}/{task_name}_mask.npy'), None

        self.batch_size = batch_size
        self.none_mask = none_mask

    def __next__(self):
        X = self.X[self.data_ptr: self.data_ptr+self.batch_size]
        y = self.y[self.data_ptr: self.data_ptr+self.batch_size]
        
        if not self.none_mask:
            sm = self.src_masks[self.data_ptr: self.data_ptr+self.batch_size]
            sm = torch.tensor(sm).cuda()
        else:
            sm = None
            
        self.data_ptr = (self.data_ptr + self.batch_size) % self.data_size

        return torch.tensor(X),\
                torch.tensor(y),\
                sm, self.tgt_mask

# %% [markdown]
### Run

# %% [code]
model_parameters = ParameterGrid({
                'n_layer': [2],
                'n_head': [4],
                'd_head': [128],
                'num_mem_tokens': [0],
                'mem_len': [10]})

param = list(model_parameters)[0]

fixed_parameters = {'n_token': NUM_TOKENS,
                    'd_model': param['d_head'],# + param['num_mem_tokens']-1,
                    'd_inner': param['d_head'],
                    'dropout': 0,
                    'dropatt': 0,
                    'tie_weight': True,
                    'div_val': 1, # ???????
                    'tie_projs': [False],
                    'tgt_len': DEC_SEQ_LEN,
                    'ext_len': 0, 
                    'cutoffs': [],
                    'attn_type': 0,}

model = MemTransformerLM(**param, **fixed_parameters)#.cuda()

gen_train = data_loader(path=f'data{INPUT_LEN}', task_name=f'{TASK_NAME}_train', batch_size=21)
src, tgt, _, _ = next(gen_train)
# src, tgt = src.cuda(), tgt.cuda()
src, tgt = src.cpu().T, tgt.cpu().T

mems = tuple()
# model(src, tgt.contiguous(), *mems)


# %% [code]
with open('data/wt103/test.txt', 'r') as f:
    t = f.read()

# %% [code]
t[:1000]

# %% [code]
from data_utils import *

corpus = get_lm_corpus('data/wt103/', 'wt103')
ntokens = len(corpus.vocab)
args.n_token = ntokens

eval_batch_size = 10
tr_iter = corpus.get_iterator('train', args.batch_size, args.tgt_len,
    device=device, ext_len=args.ext_len)
va_iter = corpus.get_iterator('valid', eval_batch_size, args.eval_tgt_len,
    device=device, ext_len=args.ext_len)
te_iter = corpus.get_iterator('test', eval_batch_size, args.eval_tgt_len,
    device=device, ext_len=args.ext_len)

# %% [code]
it = corpus.get_iterator('train', 21, 150,
    device='cpu', ext_len=3)

# %% [code]
lt = list(enumerate(it))

# %% [code]
src, tgt, l = lt[0][1]
src[-10:, :5]

# %% [code]
src, tgt, l = lt[1][1]
src[:10, :5]

# %% [code]
src.shape

# %% [code]
mems = model.init_mems(src.device)
res = model._forward(src, mems)

# %% [code]
res[0].shape, [r.shape for r in res[1]]

# %% [code]
res[1]

# %% [code]
out.shape, mems.shape

# %% [code]
dp_model.module.num_mem_tokens

# %% [code]
hasattr(model, "num_mem_tokens_")

# %% [code]
src.shape

# %% [code]
src.contiguous().view(-1).shape, src.reshape(-1).shape

# %% [code]
model.layers[0].parameters()

# %% [code]
torch.randn(1, 5)

# %% [code]
# self = model
# target = tgt.contiguous()
# data = src
# mem_tokens = None


# if not mems: mems = self.init_mems()
# if self.mem_tokens is None: self.init_mem_tokens()

# tgt_len = target.size(0)
# hidden, new_mems = self._forward(data, mems=mems, mem_tokens=mem_tokens)
# pred_hid = hidden[-tgt_len:]
# mem_tokens = hidden[-tgt_len - self.num_mem_tokens: -tgt_len]
# # if self.sample_softmax > 0 and self.training:
# #     assert self.tie_weight
# #     logit = sample_logits(self.word_emb,
# #         self.out_layer.bias, target, pred_hid, self.sampler)
# #     loss = -F.log_softmax(logit, -1)[:, :, 0]
# # else:
# loss = self.crit(pred_hid.view(-1, pred_hid.size(-1)), target.view(-1))
# loss = loss.view(tgt_len, -1)

# output = [loss]

# if new_mems is not None:
#     output += new_mems
# if self.num_mem_tokens not in (0, None):
#     output = [mem_tokens] + output

# %% [code]
# tgt_len, hidden.shape, pred_hid.shape

# %% [code]
# pred_hid.view(-1, pred_hid.size(-1))

# %% [code]
# {**param, **fixed_parameters}

# %% [code]
# out = model(src, src.contiguous())
# mem_tokens, loss, mems = out[0], out[1], out[2:]

# %% [code]
class TransformerXL(MemTransformerLM):
    def __init__(self, enc_kwargs, dec_kwargs):
        super().__init__(**enc_kwargs)
        
        self.Encoder = MemTransformerLM(**enc_kwargs)
        self.Decoder = MemTransformerLM(**dec_kwargs)

        self.Encoder.init_mem_tokens()
        self.Decoder.init_mem_tokens()

        self.enc_kwargs = enc_kwargs
        self.dec_kwargs = dec_kwargs

    def forward(self, data, target, mems=None, mem_tokens=None):

        if not mems: mems = self.Encoder.init_mems()
        if self.Encoder.mem_tokens is None: self.Encoder.init_mem_tokens()

        tgt_len = target.size(0)
        hidden, enc_mems = self.Encoder._forward(src, mems=mems, mem_tokens=mem_tokens)

        pred_hid = hidden[-tgt_len:]
        mem_tokens = hidden[-tgt_len - self.Encoder.num_mem_tokens: -tgt_len]
        

        if not enc_mems: enc_mems = self.Encoder.init_mems()
        if self.Decoder.mem_tokens is None: self.Decoder.init_mem_tokens()
        
        tgt_st = tgt[:-1]
        tgt_gt = tgt[1: ]
        
        pred, dec_mems = self.Decoder._forward(tgt_st, mems=mems, mem_tokens=mem_tokens, context=pred_hid)

        return pred, dec_mems
        loss = Loss(pred, tgt_gt)
        # num_mem = self.enc_kwargs['num_mem_tokens']
        # if num_mem not in (None, 0):
        #     mem, enc = enc[:num_mem], enc[num_mem:]

        # if self.dec_kwargs['mem_len'] == 0:
        #     mems = None


        # start_tokens = tgt[:1, :]
        # out, new_mems = self.Decoder._forward(start_tokens)
        
        # # loss = self.crit(pred_hid.view(-1, pred_hid.size(-1)), target.view(-1))

        output = [loss]

        if new_mems is not None:
            output += new_mems
        if self.num_mem_tokens not in (0, None):
            output = [mem_tokens] + output
            
        return output


# %% [code]
enc_param = {**param, **fixed_parameters}
dec_param = {**param, **fixed_parameters}

model = TransformerXL(enc_param, dec_param)

# %% [code]
mems = tuple()
hidden, mems = model.Encoder._forward(src)

# %% [code]
model(src, tgt)

# %% [code]
hidden.shape

# %% [code]


# %% [code]


# %% [code]


# %% [code]


# %% [code]


# %% [code]


# %% [code]
gen_train = data_loader(path=f'data{INPUT_LEN}', task_name=f'{TASK_NAME}_train', batch_size=BATCH_SIZE)
gen_val = data_loader(path=f'data{INPUT_LEN}', task_name=f'{TASK_NAME}_val', batch_size=VAL_SIZE)
gen_test = data_loader(path=f'data{INPUT_LEN}', task_name=f'{TASK_NAME}_test', batch_size=TEST_SIZE)


print_file = f'logs/{TASK_NAME}_{TAG}_memory_logs.txt'
t = time.time()
with torch.cuda.device(0):
    for init_num in range(NUM_INITS):
        with open(print_file, 'a') as f:
            f.write('\n\nInit number ' + str(init_num)+'\n')
        for i, param in enumerate(list(model_parameters)):
            with open(print_file, 'a') as f:
                f.write('\n\n' + str(param)+'\n')
            param['enc_depth'], param['enc_heads'] = param['depth,heads']
            param['dec_depth'], param['dec_heads'] = param['depth,heads']
            param.pop('depth,heads')

            with open(print_file, 'a') as f:
                f.write(f'{i / len(model_parameters) * 100}%')
            model = TransformerXL
            model = XTransformer(**param).cuda()

            model_name = f"{TASK_NAME}{INPUT_LEN}_dim{param['dim']}d{param['enc_depth']}h{param['enc_heads']}M{param['enc_num_memory_tokens']}l{param['enc_max_seq_len']}_{TAG}_v{init_num}"

            optim = torch.optim.Adam(model.parameters(), lr=LEARNING_RATE)
            train_validate_model(model, 
                            train_generator=gen_train, 
                            val_generator=gen_val, 
                            optim=optim, 
                            model_name=model_name, 
                            config=param,
                            num_batches=NUM_BATCHES,
                            generate_every=GENERATE_EVERY,
                            print_file=print_file,
                            tag=TAG,
                            overfit_stop=False)
            test_model(model, gen_test, model_name, param, TASK_NAME, tag=TAG)
            with open(print_file, 'a') as f:
                f.write(f'\nTotal time: {time.time() - t}\n')
            t = time.time()
