# Supplementary material
Source: ML conference proceedings conference paper supplement (https://proceedings.neurips.cc/paper_files/paper/2022/hash/47e288629a6996a17ce50b90a056a0e1-Abstract.html)
Supplement: Supplementary file 1 [file 47e288629a6996a17ce50b90a056a0e1-Supplemental-Conference.zip › RMT_supp/transformer-xl-memory_experiments/tf/gpu_utils.py]

import os
import tensorflow as tf

def assign_to_gpu(gpu=0, ps_dev="/device:CPU:0"):
    def _assign(op):
        node_def = op if isinstance(op, tf.NodeDef) else op.node_def
        if node_def.op == "Variable":
            return ps_dev
        else:
            return "/gpu:%d" % gpu
    return _assign


def average_grads_and_vars(tower_grads_and_vars):
    def average_dense(grad_and_vars):
        if len(grad_and_vars) == 1:
            return grad_and_vars[0][0]

        grad = grad_and_vars[0][0]
        for g, _ in grad_and_vars[1:]:
            grad += g
        return grad / len(grad_and_vars)

    def average_sparse(grad_and_vars):
        if len(grad_and_vars) == 1:
            return grad_and_vars[0][0]

        indices = []
        values = []
        for g, _ in grad_and_vars:
            indices += [g.indices]
            values += [g.values]
        indices = tf.concat(indices, 0)
        values = tf.concat(values, 0) / len(grad_and_vars)
        return tf.IndexedSlices(values, indices, grad_and_vars[0][0].dense_shape)

    average_grads_and_vars = []
    for grad_and_vars in zip(*tower_grads_and_vars):
        if grad_and_vars[0][0] is None:
            grad = None
        elif isinstance(grad_and_vars[0][0], tf.IndexedSlices):
            grad = average_sparse(grad_and_vars)
        else:
            grad = average_dense(grad_and_vars)
        # Keep in mind that the Variables are redundant because they are shared
        # across towers. So .. we will just return the first tower's pointer to
        # the Variable.
        v = grad_and_vars[0][1]
        grad_and_var = (grad, v)
        average_grads_and_vars.append(grad_and_var)
    return average_grads_and_vars


def load_from_checkpoint(saver, logdir):
    sess = tf.get_default_session()
    ckpt = tf.train.get_checkpoint_state(logdir)
    if ckpt and ckpt.model_checkpoint_path:
        if os.path.isabs(ckpt.model_checkpoint_path):
            # Restores from checkpoint with absolute path.
            saver.restore(sess, ckpt.model_checkpoint_path)
        else:
            # Restores from checkpoint with relative path.
            saver.restore(sess, os.path.join(logdir, ckpt.model_checkpoint_path))
        return True
    return False
