# Supplementary material
Source: ML conference proceedings conference paper supplement (https://proceedings.neurips.cc/paper_files/paper/2022/hash/47e288629a6996a17ce50b90a056a0e1-Abstract.html)
Supplement: Supplementary file 1 [file 47e288629a6996a17ce50b90a056a0e1-Supplemental-Conference.zip › RMT_supp/transformer-xl-memory_experiments/tf/sota/lm1b.sh]

#!/bin/bash

# Data
DATA_ROOT=./
DATA_DIR=${DATA_ROOT}/pretrained_xl/tf_lm1b/data
MODEL_DIR=${DATA_ROOT}/pretrained_xl/tf_lm1b/model

# Model
DIV_VAL=4
N_LAYER=24
D_MODEL=1280
D_EMBED=1280
N_HEAD=16
D_HEAD=80
D_INNER=8192

# Testing
TEST_TGT_LEN=32
TEST_MEM_LEN=128
TEST_CLAMP_LEN=-1

TEST_CKPT_PATH=${MODEL_DIR}/model.ckpt-1191000
TEST_BSZ=16
TEST_NUM_CORE=1


echo 'Preprocess test set...'
python data_utils.py \
    --data_dir=${DATA_DIR}/ \
    --dataset=lm1b \
    --tgt_len=${TEST_TGT_LEN} \
    --per_host_test_bsz=${TEST_BSZ} \
    --num_passes=1 \
    --use_tpu=False

echo 'Run evaluation on test set...'
python train_gpu.py \
    --data_dir=${DATA_DIR}/tfrecords \
    --record_info_dir=${DATA_DIR}/tfrecords/ \
    --corpus_info_path=${DATA_DIR}/corpus-info.json \
    --eval_ckpt_path=${TEST_CKPT_PATH} \
    --model_dir=EXP-lm1b \
    --div_val=${DIV_VAL} \
    --untie_r=True \
    --proj_share_all_but_first=False \
    --proj_same_dim=False \
    --n_layer=${N_LAYER} \
    --d_model=${D_MODEL} \
    --d_embed=${D_EMBED} \
    --n_head=${N_HEAD} \
    --d_head=${D_HEAD} \
    --d_inner=${D_INNER} \
    --dropout=0.0 \
    --dropatt=0.0 \
    --tgt_len=${TEST_TGT_LEN} \
    --mem_len=${TEST_MEM_LEN} \
    --clamp_len=${TEST_CLAMP_LEN} \
    --same_length=True \
    --eval_batch_size=${TEST_BSZ} \
    --num_core_per_host=${TEST_NUM_CORE} \
    --do_train=False \
    --do_eval=True \
    --eval_split=test
