# Supplementary material
Source: ML conference proceedings conference paper supplement (https://proceedings.neurips.cc/paper_files/paper/2022/hash/47e288629a6996a17ce50b90a056a0e1-Abstract.html)
Supplement: Supplementary file 1 [file 47e288629a6996a17ce50b90a056a0e1-Supplemental-Conference.zip › RMT_supp/transformer-xl-memory_experiments/tf/vocabulary.py]

from __future__ import absolute_import
from __future__ import division
from __future__ import print_function

from collections import Counter, OrderedDict

import numpy as np

import tensorflow as tf

from tensorflow.gfile import Open as open
from tensorflow.gfile import Exists as exists

class Vocab(object):
  def __init__(self, special=[], min_freq=0, max_size=None, lower_case=True,
         delimiter=None, vocab_file=None):
    self.counter = Counter()
    self.special = special
    self.min_freq = min_freq
    self.max_size = max_size
    self.lower_case = lower_case
    self.delimiter = delimiter
    self.vocab_file = vocab_file

  def tokenize(self, line, add_eos=False, add_double_eos=False):
    line = line.strip()
    # convert to lower case
    if self.lower_case:
      line = line.lower()

    # empty delimiter '' will evaluate False
    if self.delimiter == '':
      symbols = line
    else:
      symbols = line.split(self.delimiter)

    if add_double_eos: # lm1b
      return ['<S>'] + symbols + ['<S>']
    elif add_eos:
      return symbols + ['<eos>']
    else:
      return symbols

  def count_file(self, path, verbose=False, add_eos=False):
    if verbose: print('counting file {} ...'.format(path))
    assert exists(path)

    sents = []
    with open(path, 'r') as f:
      for idx, line in enumerate(f):
        if verbose and idx > 0 and idx % 500000 == 0:
          print('  line {}'.format(idx))
        symbols = self.tokenize(line, add_eos=add_eos)
        self.counter.update(symbols)
        sents.append(symbols)

    return sents

  def count_sents(self, sents, verbose=False):
    """
      sents : a list of sentences, each a list of tokenized symbols
    """
    if verbose: print('counting {} sents ...'.format(len(sents)))
    for idx, symbols in enumerate(sents):
      if verbose and idx > 0 and idx % 500000 == 0:
        print('  line {}'.format(idx))
      self.counter.update(symbols)

  def _build_from_file(self, vocab_file):
    self.idx2sym = []
    self.sym2idx = OrderedDict()

    with open(vocab_file, 'r') as f:
      for line in f:
        symb = line.strip().split()[0]
        self.add_symbol(symb)
    self.unk_idx = self.sym2idx['<UNK>']

  def build_vocab(self):
    if self.vocab_file:
      print('building vocab from {}'.format(self.vocab_file))
      self._build_from_file(self.vocab_file)
      print('final vocab size {}'.format(len(self)))
    else:
      print('building vocab with min_freq={}, max_size={}'.format(
        self.min_freq, self.max_size))
      self.idx2sym = []
      self.sym2idx = OrderedDict()

      for sym in self.special:
        self.add_special(sym)

      for sym, cnt in self.counter.most_common(self.max_size):
        if cnt < self.min_freq: break
        self.add_symbol(sym)

      print('final vocab size {} from {} unique tokens'.format(
        len(self), len(self.counter)))

  def encode_file(self, path, ordered=False, verbose=False, add_eos=True,
          add_double_eos=False):
    if verbose: print('encoding file {} ...'.format(path))
    assert exists(path)
    encoded = []
    with open(path, 'r') as f:
      for idx, line in enumerate(f):
        if verbose and idx > 0 and idx % 500000 == 0:
          print('  line {}'.format(idx))
        symbols = self.tokenize(line, add_eos=add_eos,
          add_double_eos=add_double_eos)
        encoded.append(self.convert_to_nparray(symbols))

    if ordered:
      encoded = np.concatenate(encoded)

    return encoded

  def encode_sents(self, sents, ordered=False, verbose=False):
    if verbose: print('encoding {} sents ...'.format(len(sents)))
    encoded = []
    for idx, symbols in enumerate(sents):
      if verbose and idx > 0 and idx % 500000 == 0:
        print('  line {}'.format(idx))
      encoded.append(self.convert_to_nparray(symbols))

    if ordered:
      encoded = np.concatenate(encoded)

    return encoded

  def add_special(self, sym):
    if sym not in self.sym2idx:
      self.idx2sym.append(sym)
      self.sym2idx[sym] = len(self.idx2sym) - 1
      setattr(self, '{}_idx'.format(sym.strip('<>')), self.sym2idx[sym])

  def add_symbol(self, sym):
    if sym not in self.sym2idx:
      self.idx2sym.append(sym)
      self.sym2idx[sym] = len(self.idx2sym) - 1

  def get_sym(self, idx):
    assert 0 <= idx < len(self), 'Index {} out of range'.format(idx)
    return self.idx2sym[idx]

  def get_idx(self, sym):
    if sym in self.sym2idx:
      return self.sym2idx[sym]
    else:
      assert hasattr(self, 'unk_idx')
      return self.sym2idx.get(sym, self.unk_idx)

  def get_symbols(self, indices):
    return [self.get_sym(idx) for idx in indices]

  def get_indices(self, symbols):
    return [self.get_idx(sym) for sym in symbols]

  def convert_to_nparray(self, symbols):
    nparray = np.array(self.get_indices(symbols), dtype=np.int64)
    return nparray

  def convert_to_sent(self, indices, exclude=None):
    if exclude is None:
      return ' '.join([self.get_sym(idx) for idx in indices])
    else:
      return ' '.join([self.get_sym(idx) for idx in indices if idx not in exclude])

  def __len__(self):
    return len(self.idx2sym)
