# Supplementary material
Source: ML conference proceedings conference paper supplement (https://proceedings.neurips.cc/paper_files/paper/2022/hash/47e288629a6996a17ce50b90a056a0e1-Abstract.html)
Supplement: Supplementary file 1 [file 47e288629a6996a17ce50b90a056a0e1-Supplemental-Conference.zip › RMT_supp/visualization_notebooks/attn-maps.ipynb]

# %% [markdown]
### load model

# %% [code]
import torch
import matplotlib
import torch.nn.functional as F
from pytorch.experiment_utils.generate_data import *
from matplotlib import pyplot as plt

import sys
sys.path.append('pytorch')
sys.path.append('pytorch/utils')

# %% [code]
# !ls ../evaluation64/tl24xl0mt24_l4h4_lr25e-5_rlrp-copy/20220114-184122


# %% [markdown]
#### reverse

# %% [code]
# path = '../../data'
path = '/home/ayd98/Desktop/MIPT/Memory transformer/data24'
tr_iter = data_loader('train', path=path, task_name='reverse', batch_size=32,
                                        tgt_len=24, device='cpu')
gen = next(tr_iter)
data, target, l = next(gen)

# # acc = 1
# path = '../models/reverse_tl12xl0mt6.pt'

# # acc = 0.8
# path = '../models/reverse_tl12xl6mt0.pt'

# path = '../models/reverse_tl24mt24.pt'

# path = '../models/reverse_tl24xl24.pt'

path = '../models/reverse_tl8xl0mt8.pt'

model = torch.load(path, map_location='cpu')

# %% [code]
# model.num_mem_tokens

# %% [markdown]
#### copy

# %% [code]
!ls ../models

# %% [code]
# path = '/home/ayd98/Desktop/MIPT/Memory transformer/data24'
# tr_iter = data_loader('train', path=path, task_name='copy', batch_size=32,
#                                         tgt_len=24, device='cpu')
# gen = next(tr_iter)
# data, target, l = next(gen)

# # # tl24mt24
# # # acc ~1
# # path = '../models/copy_tl24xl0mt24.pt'

# # # tl24mt24
# # # acc ~1
# # path = '../models/copy_tl24xl24mt0.pt'


# # acc ~1
# path = '../models/copy_tl8xl0mt8.pt'


# # # acc ~0.2
# # path = '../models/copy_tl8xl8mt0_low_acc.pt'

# model = torch.load(path, map_location='cpu')

# %% [markdown]
#### retrieval

# %% [code]
# # path = '../../data'
# path = '../../../x-transformers/data'
# tr_iter = data_loader('train', path=path, task_name='retrieval', batch_size=32,
#                                         tgt_len=10, device='cuda')
# gen = next(tr_iter)
# data, target, l = next(gen)

# # path = '../evaluation/tl10xl0mt0_lr1e-4_rlrp-retrieval/20220113-160611/model.pt'

# # #l1h1
# # path = '../evaluation/tl10xl0mt0_l1h1_lr1e-4_rlrp-retrieval/20220113-151239/model.pt'

# # #l2h2
# # path = '../evaluation/tl10xl0mt0_l2h2_lr3e-4_rlrp_as1-retrieval/20220113-101945/model.pt'

# #l6h4
# path = '../evaluation/tl5xl5mt0_l6h4_lr25e-5_rlrp-retrieval/20220117-103246/model.pt'


# model = torch.load(path).to(device='cuda')

# %% [markdown]
forward

# %% [code]
def get_attn_maps(model, data, target, mems=None, mem_tokens=model.num_mem_tokens):
    self = model

    if not mems: mems = model.init_mems(data.device)

    tgt_len = target.size(0)


    dec_inp = data

    word_emb = self.word_emb(dec_inp)

    mlen = mems[0].size(0) if mems is not None else 0

    # Concat with mem_tokens
    if mem_tokens is not None:
        word_emb = torch.cat((mem_tokens, word_emb), dim=0)
        if self.mem_at_end:
            word_emb = torch.cat((word_emb, mem_tokens), dim=0)

    qlen = word_emb.shape[0]
    klen = mlen + qlen
    if self.same_length:
        all_ones = word_emb.new_ones(qlen, klen)
        mask_len = klen - self.mem_len
        if mask_len > 0:
            mask_shift_len = qlen - mask_len
        else:
            mask_shift_len = qlen
        dec_attn_mask = (torch.triu(all_ones, 1+mlen)
                + torch.tril(all_ones, -mask_shift_len)).byte()[:, :, None] # -1
    else:
        dec_attn_mask = torch.triu(
            word_emb.new_ones(qlen, klen), diagonal=1+mlen).byte()

        if self.num_mem_tokens != 0:
            dec_attn_mask[:self.num_mem_tokens, mlen:mlen+self.num_mem_tokens] = 0
            dec_attn_mask[:self.num_mem_tokens, :mlen] = 1 - int(self.read_mem_from_cache)
            if self.mem_at_end:
                dec_attn_mask[-self.num_mem_tokens:, -self.num_mem_tokens:] = 0
                dec_attn_mask[-self.num_mem_tokens:, :mlen] = 1 - int(self.read_mem_from_cache)
        dec_attn_mask = dec_attn_mask[:,:,None]

    hids = []
    # if self.attn_type == 0: # default
    pos_seq = torch.arange(klen-1, -1, -1.0, device=word_emb.device, 
                           dtype=word_emb.dtype)
    if self.clamp_len > 0:
        pos_seq.clamp_(max=self.clamp_len)
    pos_emb = self.pos_emb(pos_seq)

    core_out = self.drop(word_emb)
    pos_emb = self.drop(pos_emb)

    hids.append(core_out)
    
    attn_maps = [] 
    for i, layer in enumerate(self.layers):
        print('got layer ', i)
        mems_i = None if mems is None else mems[i]
        core_out = layer(core_out, pos_emb, self.r_w_bias,
                self.r_r_bias, dec_attn_mask=dec_attn_mask, mems=mems_i)
        hids.append(core_out)
        
        w, r, r_w_bias, r_r_bias, attn_mask, mems1 = core_out, pos_emb, self.r_w_bias, self.r_r_bias, dec_attn_mask, mems_i
        
        qlen, rlen, bsz = w.size(0), r.size(0), w.size(1)

        self1 = layer.dec_attn
        if mems1 is not None:
            cat = torch.cat([mems1, w], 0)
            if self1.pre_lnorm:
                w_heads = self1.qkv_net(self1.layer_norm(cat))
            else:
                w_heads = self1.qkv_net(cat)
            r_head_k = self1.r_net(r)

            w_head_q, w_head_k, w_head_v = torch.chunk(w_heads, 3, dim=-1)
            w_head_q = w_head_q[-qlen:]
        else:
            if self1.pre_lnorm:
                w_heads = self1.qkv_net(self1.layer_norm(w))
            else:
                w_heads = self1.qkv_net(w)
            r_head_k = self1.r_net(r)

            w_head_q, w_head_k, w_head_v = torch.chunk(w_heads, 3, dim=-1)

        klen = w_head_k.size(0)

        w_head_q = w_head_q.view(qlen, bsz, self1.n_head, self.d_head)           # qlen x bsz x n_head x d_head
        w_head_k = w_head_k.view(klen, bsz, self1.n_head, self.d_head)           # qlen x bsz x n_head x d_head
        w_head_v = w_head_v.view(klen, bsz, self1.n_head, self.d_head)           # qlen x bsz x n_head x d_head

        r_head_k = r_head_k.view(rlen, self1.n_head, self.d_head)                # qlen x n_head x d_head

        #### compute attention score
        rw_head_q = w_head_q + r_w_bias                                         # qlen x bsz x n_head x d_head
        AC = torch.einsum('ibnd,jbnd->ijbn', (rw_head_q, w_head_k))             # qlen x klen x bsz x n_head

        rr_head_q = w_head_q + r_r_bias
        BD = torch.einsum('ibnd,jnd->ijbn', (rr_head_q, r_head_k))              # qlen x klen x bsz x n_head
        BD = self1._rel_shift(BD)

        # [qlen x klen x bsz x n_head]
        attn_score = AC + BD
        attn_score.mul_(self1.scale)

        #### compute attention probability
        if attn_mask is not None and attn_mask.any().item():
            if attn_mask.dim() == 2:
                attn_score = attn_score.float().masked_fill(
                    attn_mask[None,:,:,None].bool(), -float('inf')).type_as(attn_score)
            elif attn_mask.dim() == 3:
                attn_score = attn_score.float().masked_fill(
                    attn_mask[:,:,:,None].bool(), -float('inf')).type_as(attn_score)
        
        attn_prob = F.softmax(attn_score, dim=1)
#         attn_prob = self1.dropatt(attn_prob)
        
        attn_maps.append(attn_prob)
        
    return attn_maps
    

# %% [code]
# attn_maps = get_attn_maps(model, data, target)

# %% [code]
batch_size = 32
n_chunks = 6

mems = tuple()
if model.mem_tokens is not None:
    mem_tokens = model.mem_tokens.repeat(1, batch_size, 1)
else:
    mem_tokens = None

data_segs = torch.chunk(data, n_chunks)
target_segs = torch.chunk(target, n_chunks)
chunk_attn_maps = []

for i, (d, t) in enumerate(zip(data_segs, target_segs)):
    
    
    attn_maps = get_attn_maps(model, d, t, mems, mem_tokens)
    chunk_attn_maps.append(attn_maps)
    
    ret = model(d, t, *mems, mem_tokens=mem_tokens)
    if model.num_mem_tokens == 0:
        loss, mems = ret[0], ret[1:]
    else:
        mem_tokens, loss, mems = ret[0], ret[1], ret[2:]

    

    print(loss.mean())

# %% [code]
len(chunk_attn_maps), len(chunk_attn_maps[0])

# %% [code]
model.mem_len, model.num_mem_tokens

# %% [code]
name = 'images/reverse_tl8mt8.pdf'

# %% [code]
fontdict = {'fontsize': 25}
fd_small = {'fontsize': 16}

matplotlib.use('Agg')

batch_ind = 0
ticks = data[:, batch_ind].chunk(n_chunks)

ls = len(chunk_attn_maps[0])
hs = chunk_attn_maps[0][0].shape[-1]
n_chunks = len(chunk_attn_maps)
fig, axs = plt.subplots(n_chunks*ls, hs, figsize=(40, 30 * n_chunks))

for c, attn_maps in enumerate(chunk_attn_maps):
    # if c == 1:
    #     break
#     ls = len(attn_maps)
    hs = attn_maps[0].shape[-1]
    for l, layer_maps in enumerate(attn_maps):
        # if l == 1:
        #     break
        row = l + ls * c
        for h in range(layer_maps.shape[-1]):
            attn_map = layer_maps[:, :, batch_ind, h]

            if ls == hs == 1:
                axis = axs
            elif ls == 1:
                axis = axs[h]
            elif hs == 1:
                axis = axs[row]
            else: 
                axis = axs[row, h]
            axis.matshow(attn_map.cpu().detach().numpy(), cmap='Reds')
            
            axis.set_ylabel("Layer "+str(l+1), fontdict=fontdict)
        
            # if l == len(attn_maps)-1:
            axis.set_xlabel("Head "+str(h+1), fontdict=fontdict)
            
            # if l == 0:
            axis.set_title(f'Chunk {c+1}', fontdict=fontdict)
            
            
            tokens = ['mem'] * model.num_mem_tokens + list(ticks[c].numpy()) + ['mem'] * model.num_mem_tokens
            

            axis.set_yticks(range(len(tokens)))
            axis.set_yticklabels(tokens, fontdict=fd_small)
            if c > 0:
                tokens = ['mem'] * model.mem_len + tokens

            axis.set_xticks(range(len(tokens)))
            axis.set_xticklabels(tokens, rotation=90, fontdict=fd_small)

plt.tight_layout()

plt.savefig(name, facecolor='white', format='pdf')
# plt.show()
