# Supplementary material
Source: ML conference proceedings conference paper supplement (https://proceedings.neurips.cc/paper_files/paper/2022/hash/47e288629a6996a17ce50b90a056a0e1-Abstract.html)
Supplement: Supplementary file 1 [file 47e288629a6996a17ce50b90a056a0e1-Supplemental-Conference.zip › RMT_supp/visualization_notebooks/interpret_synthetic.ipynb]

# %% [code]
import pandas as pd

# %% [code]
# !scp mygpu:TXL/transformer-xl/pytorch/test_res.csv ./test_res_retrieval.csv

# %% [code]
# !scp gpu6:bulatov/TXL/_git/test_res.csv ./test_res_synthetic_results.csv

# %% [code]
# df = pd.read_csv('test_res_synthetic.csv')
# df = pd.concat((df, pd.read_csv('test_res_mygpu.csv')))
# df = pd.concat((df, pd.read_csv('test_res_synthetic_results.csv')))
# df = pd.concat((df, pd.read_csv('test_res_synthetic_results_all.csv')))
df_retrieval = pd.read_csv('test_res_retrieval.csv')
df = pd.read_csv('test_res_synthetic_results.csv')

# %% [code]
df = df.dropna(subset=['last_val_acc'])
df = df.drop('work_dir', axis=1)
df = df.drop_duplicates()

df = df[(df.max_step > 450000) | (df.tgt_len >= 24)]
# df = df[~((df.tgt_len == 12) & (df.max_step == 700000))]
df = df[~((df.tgt_len == 24) & (df.max_step == 300000))]
df = df[~((df.tgt_len == 8) & (df.num_mem_tokens == 12))]
df = df[~((df.dataset == 'reverse') & (df.max_step == 900000))]


df_retrieval = df_retrieval.dropna(subset=['last_val_acc'])
df_retrieval = df_retrieval.drop('work_dir', axis=1)
df_retrieval = df_retrieval.drop_duplicates()

# %% [code]
reverse = df[df.dataset == 'reverse']
copy = df[df.dataset == 'copy']
retrieval = df_retrieval[df_retrieval.dataset.apply(lambda x: 'retrieval' in x)]

# %% [code]
gb_cols = ['dataset', 'tgt_len', 'lr', 'max_step',  'num_mem_tokens', 'mem_len', 'mem_backprop_depth']#, 'seed']
df_ = copy
gb = df_.dropna(subset=['test acc']).groupby(gb_cols).agg({'test acc': tuple})
gb['mean acc'] = df_.groupby(gb_cols).mean()['test acc']
gb

# %% [code]
df_ = reverse
gb_cols = ['dataset', 'tgt_len', 'max_step',  'num_mem_tokens', 'mem_len', 'mem_backprop_depth']#, 'seed']
gb = df_.dropna(subset=['test acc']).groupby(gb_cols).agg({'test acc': tuple})
gb['mean acc'] = df_.groupby(gb_cols).mean()['test acc']
gb['med acc'] = df_.groupby(gb_cols).median()['test acc']
gb['med acc'] = df_.groupby(gb_cols).median()['test acc']
gb

# %% [code]
df_ = retrieval[retrieval.lr == 0.0001]
gb_cols = ['dataset', 'tgt_len', 'max_step',  'num_mem_tokens', 'mem_len', 'mem_backprop_depth']#, 'seed']
gb = df_.dropna(subset=['test acc']).groupby(gb_cols).agg({'test acc': tuple})
gb['mean acc'] = df_.groupby(gb_cols).mean()['test acc']
gb
