# Supplementary material
Source: ML conference proceedings conference paper supplement (https://proceedings.neurips.cc/paper_files/paper/2022/hash/47e288629a6996a17ce50b90a056a0e1-Abstract.html)
Supplement: Supplementary file 1 [file 47e288629a6996a17ce50b90a056a0e1-Supplemental-Conference.zip › RMT_supp/visualization_notebooks/plot_graphs_lm.ipynb]

# %% [code]
import pandas as pd
import numpy as np
import os
import matplotlib.pyplot as plt

# %% [code]
!scp gpu6:bulatov/TXL/_git/test_res.csv ./test_res_lm_results.csv

# %% [code]
res_df = pd.read_csv('test_res_lm_results.csv')

# %% [code]


# %% [code]
res_df.shape, res_df.drop_duplicates().shape

# %% [code]
# res_df = res_df[res_df.dataset =='wt103']
res_df['effective context'] = (res_df.mem_backprop_depth.fillna(0) + 1) * res_df.tgt_len
res_df['mem_backprop_depth'] = res_df['mem_backprop_depth'].fillna(0)
res_df = res_df.drop_duplicates()
res_df = res_df[res_df.mem_recursion_depth.isna()]

# %% [code]
res_df.loc[res_df.mem_len > 0, ['effective context']] = res_df[res_df.mem_len > 0]['effective context'] + res_df[res_df.mem_len > 0].mem_len

# %% [code]
enwik8 = res_df[res_df.dataset == 'enwik8']
res_df = res_df[res_df.dataset =='wt103']

# %% [code]
mt = res_df[(res_df.mem_len == 0) & (res_df.num_mem_tokens != 0)].dropna(subset=['test ppl'])
xl = res_df[(res_df.mem_len > 0) & (res_df.num_mem_tokens == 0)].dropna(subset=['test ppl'])

mt_base = mt[mt.n_layer == 16]
mt_large = mt[mt.n_layer == 18]

xl_base = xl[xl.n_layer == 16]
xl_large = xl[xl.n_layer == 18]

# %% [code]
target_cols = ['dataset', 'n_layer', 'scheduler', 'max_step', 'tgt_len', 'effective context',
        'mem_len', 'num_mem_tokens',
       'lr', 'patience', 'device_ids', 'mem_backprop_depth','test loss', 'test ppl']

# %% [code]
import seaborn as sns

sns.set_theme(style='white', palette='BuPu', font_scale=1.3, font='monospace')

# %% [code]
import seaborn as sns

sns.set_theme(style='white', palette='Reds', font_scale=1.7, font='monospace')

fontsize = 22
legsize=20

fig, axs = plt.subplots(1, figsize=(12, 8))

for i, tgt_len in enumerate([50]):
    df_ = mt_base[mt_base.tgt_len == tgt_len]
    xl_ = xl_base[xl_base.tgt_len == tgt_len]

    df_ = df_.groupby(['mem_backprop_depth', 'effective context', 'num_mem_tokens', 'tgt_len']).mean()['test ppl'].reset_index()
    bpds = np.unique(df_.mem_backprop_depth)

    xl_ = xl_.groupby(['effective context', 'mem_len', 'tgt_len']).mean()['test ppl'].reset_index()
    axs.scatter(xl_['effective context'], xl_['test ppl'], s=xl_['mem_len'] * 15, edgecolor='k', color=(0.78, 0.78, 1))

    for bpd in bpds:
        slice = df_[df_.mem_backprop_depth == bpd]
        axs.scatter(slice['effective context'], slice['test ppl'], s=slice.num_mem_tokens * 15 + 15, edgecolor='r', c=None if bpd > 0 else 'w')

    axs.set_xlabel(f'visible context while training\ncontext={tgt_len}', size=fontsize)
    axs.set_ylabel('ppl', size=fontsize)
    lgnd = axs.legend(['Transformer-XL'] + [f'RMT BPTT-{int(b)}' for b in bpds], fontsize=legsize)
    for j in range(len(bpds) + 1):
        lgnd.legendHandles[j]._sizes = [80]


    for m in np.unique(df_.num_mem_tokens):
        slice = df_[(df_.num_mem_tokens == m) & (df_.tgt_len == tgt_len)].sort_values('effective context')
        axs.plot(slice['effective context'], slice['test ppl'], c='r', zorder=0)
    # for x, y in zip(slice['effective context'], slice['test ppl']):
        # axs[i].annotate(m, (slice['effective context'].values[-1], slice['test ppl'].values[-1]), size=22, c=(0.1, 0.2, 0.6))
        axs.annotate(m, (slice['effective context'].values[-1], slice['test ppl'].values[-1]), size=22, color=(0.6, 0.2, 0.2))

    slice = xl_[xl_.tgt_len == tgt_len]
    axs.plot(slice['effective context'], slice['test ppl'], c='c', zorder=0)
    for v, x, y in zip(slice.mem_len, slice['effective context'], slice['test ppl']):
        # axs[i].annotate(v, (x, y), size=22, c=(0.2, 0.1, 0.1))
        axs.annotate(v, (x, y), size=22, c=(0.1, 0.1, 0.2))

    axs.grid()
    # plt.yticks(fontsize=20)

plt.tight_layout()
plt.savefig('../../Memory transformer/_figures_paper/effective_context_50.png', format='png')
plt.show()

# %% [code]
import seaborn as sns

sns.set_theme(style='white', palette='Reds', font_scale=1.7, font='monospace')

fontsize = 22
legsize=20

fig, axs = plt.subplots(1, figsize=(12, 8))

tgt_len = 128

enwik8['mem_size'] = enwik8.num_mem_tokens + enwik8.mem_len
df_ = enwik8[(enwik8.tgt_len == tgt_len) & (enwik8.num_mem_tokens > 0) & (enwik8.mem_size != 30)]
xl_ = enwik8[(enwik8.tgt_len == tgt_len) & (enwik8.mem_len > 0) & (enwik8.mem_size != 30)]
xl_ = xl_[xl_.mem_size < 50]

df_ = df_.groupby(['mem_backprop_depth', 'mem_size', 'tgt_len']).mean()['test bpc'].reset_index()
bpds = np.unique(df_.mem_backprop_depth)

xl_ = xl_.groupby(['mem_size', 'tgt_len']).mean()['test bpc'].reset_index()
axs.scatter(xl_['mem_size'], xl_['test bpc'], s=120, edgecolor='k', color=(0.78, 0.78, 1))
axs.plot(xl_.mem_size, xl_['test bpc'], c=(0.1, 0.1, 0.2), zorder=-1)

for bpd in bpds:
    slice = df_[df_.mem_backprop_depth == bpd].sort_values('mem_size')
    axs.plot(slice.mem_size, slice['test bpc'], zorder=-1)
    # axs.scatter(slice['mem_size'], slice['test bpc'], s=slice.mem_size * 15 + 15, edgecolor='r', c=None if bpd > 0 else 'w')
    axs.scatter(slice['mem_size'], slice['test bpc'], s=120, edgecolor='r', c=None if bpd > 0 else 'w')


for bpd in bpds:
    slice = df_[df_.mem_backprop_depth == bpd]


axs.set_xlabel('memory size', size=fontsize)
axs.set_ylabel('bpc', size=fontsize)
lgnd = axs.legend(['Transformer-XL'] + [f'RMT BPTT-{int(b)}' for b in bpds], fontsize=legsize)
# for j in range(len(bpds) + 1):
#     lgnd.legendHandles[j]._sizes = [80]


# for m in np.unique(df_.num_mem_tokens):
#     slice = df_[(df_.num_mem_tokens == m) & (df_.tgt_len == tgt_len)].sort_values('effective context')
#     axs.plot(slice['effective context'], slice['test ppl'], c='r', zorder=0)
# # for x, y in zip(slice['effective context'], slice['test ppl']):
#     # axs[i].annotate(m, (slice['effective context'].values[-1], slice['test ppl'].values[-1]), size=22, c=(0.1, 0.2, 0.6))
#     axs.annotate(m, (slice['effective context'].values[-1], slice['test ppl'].values[-1]), size=22, c=(0.6, 0.2, 0.2))

# slice = xl_[xl_.tgt_len == tgt_len]
# axs.plot(slice['effective context'], slice['test ppl'], c='c', zorder=0)
# for v, x, y in zip(slice.mem_len, slice['effective context'], slice['test ppl']):
#     # axs[i].annotate(v, (x, y), size=22, c=(0.2, 0.1, 0.1))
#     axs.annotate(v, (x, y), size=22, c=(0.1, 0.1, 0.2))
# axs.set_title('enwik8 context=128')
axs.grid()
plt.savefig('../../Memory transformer/_figures_paper/mem_size_enwik_scatter.png', format='png')
plt.show()

# %% [code]
import seaborn as sns

sns.set_theme(style='white', palette='Reds', font_scale=1.3, font='monospace')
fontsize=28
legsize=22

df = res_df[(res_df.n_layer == 16) & (res_df.tgt_len == 50)]
df['mem_size'] = df.mem_len + df.num_mem_tokens

mem_lens = np.unique(df.mem_size)
plot_df = pd.DataFrame(index = mem_lens)

fontdict = {'fontsize': 18, 'font':'courier'}
width = 0.8


# STD
plot_df = pd.DataFrame(index = mem_lens)
plot_df['ppl_XL'] = [df[(df.num_mem_tokens == 0) & (df.mem_len == i)]['test ppl'].std() for i in mem_lens]
plot_df['ppl_MT_bpd-0'] = [df[(df.num_mem_tokens == i) & (df.mem_len == 0) & (df.mem_backprop_depth == 0)]['test ppl'].std() for i in mem_lens]
plot_df['ppl_MT_bpd-1'] = [df[(df.num_mem_tokens == i) & (df.mem_len == 0) & (df.mem_backprop_depth == 1)]['test ppl'].std() for i in mem_lens]
plot_df['ppl_MT_bpd-2'] = [df[(df.num_mem_tokens == i) & (df.mem_len == 0) & (df.mem_backprop_depth == 2)]['test ppl'].std() for i in mem_lens]

std_df = plot_df.reset_index().iloc[:-2]

# Mean
plot_df['ppl_XL'] = [df[(df.num_mem_tokens == 0) & (df.mem_len == i)]['test ppl'].mean() for i in mem_lens]
plot_df['ppl_MT_bpd-0'] = [df[(df.num_mem_tokens == i) & (df.mem_len == 0) & (df.mem_backprop_depth == 0)]['test ppl'].mean() for i in mem_lens]
plot_df['ppl_MT_bpd-1'] = [df[(df.num_mem_tokens == i) & (df.mem_len == 0) & (df.mem_backprop_depth == 1)]['test ppl'].mean() for i in mem_lens]
plot_df['ppl_MT_bpd-2'] = [df[(df.num_mem_tokens == i) & (df.mem_len == 0) & (df.mem_backprop_depth == 2)]['test ppl'].mean() for i in mem_lens]

plot_df = plot_df.reset_index().iloc[:-2]

width = 0.2
x = np.arange(plot_df.shape[0])

col_pos = np.arange(len(plot_df.columns[1:]))
biases = (col_pos - np.mean(col_pos)) * width


fig, ax = plt.subplots(figsize=(12, 8))
rects = []
for i, col in enumerate(plot_df.columns[1:]):
    if i == 0:
        color=(0.78, 0.78, 1)
        # color = 'lightblue'
    else:
        color = None
    rect = ax.bar(x + biases[i], plot_df[col], width, edgecolor='k', color=color, yerr=std_df[col], capsize=4)
    rects.append(rect)

plt.legend(['Transformer-XL', 'RMT', 'RMT BPTT-1', 'RMT BPTT-2'], fontsize=legsize, loc='upper right')

plt.xlabel('memory size', fontsize=fontsize)
plt.ylabel('test ppl', fontsize=fontsize)
plt.xticks(ticks = np.arange(len(plot_df.index)), rotation=0, labels=plot_df['index'], fontsize=20)
plt.yticks(fontsize=20)
plt.ylim(21, 40)
plt.grid()
plt.savefig('../../Memory transformer/_figures_paper/mem_size.png', format='png')
plt.show()
