# Supplementary material
Source: ML conference proceedings conference paper supplement (https://proceedings.neurips.cc/paper_files/paper/2022/hash/47e288629a6996a17ce50b90a056a0e1-Abstract.html)
Supplement: Supplementary file 1 [file 47e288629a6996a17ce50b90a056a0e1-Supplemental-Conference.zip › RMT_supp/visualization_notebooks/visualize_synthetic.ipynb]

# %% [code]
import pandas as pd
import numpy as np
from matplotlib import pyplot as plt

# %% [code]
# !scp mygpu:TXL/transformer-xl/pytorch/test_res.csv ./test_res_retrieval.csv

# %% [code]
# !scp gpu6:bulatov/TXL/_git/test_res.csv ./test_res_synthetic_results.csv

# %% [code]
df_retrieval = pd.read_csv('test_res_retrieval.csv')
df = pd.read_csv('test_res_synthetic_results.csv')
# df = pd.concat((df, df_retrieval))

# %% [code]
df = df.dropna(subset=['test acc'])
df = df.drop('work_dir', axis=1)
df = df.drop_duplicates()

df_retrieval = df_retrieval.dropna(subset=['test acc'])
df_retrieval = df_retrieval.drop('work_dir', axis=1)
df_retrieval = df_retrieval.drop_duplicates()

# %% [code]
df = df[(df.max_step > 450000) | (df.tgt_len >= 24)]
# df = df[~((df.tgt_len == 12) & (df.max_step == 700000))]
df = df[~((df.tgt_len == 24) & (df.max_step == 300000))]
df = df[~((df.tgt_len == 8) & (df.num_mem_tokens == 12))]
df = df[~((df.dataset == 'reverse') & (df.max_step == 900000))]

df_retrieval = df_retrieval[df_retrieval.mem_backprop_depth == 0]

# %% [code]
res_df = df

# %% [code]
df['mem_size'] = df.num_mem_tokens + df.mem_len
retrieval['mem_size'] = retrieval.num_mem_tokens + retrieval.mem_len

reverse = df[df.dataset == 'reverse']
copy = df[df.dataset == 'copy']
retrieval = df_retrieval[df_retrieval.dataset.apply(lambda x: 'retrieval' in x)]

retrieval = retrieval[(retrieval.lr == 0.0001) & (retrieval.tgt_len <= 10) & (retrieval.max_step != 250000)]

# %% [code]
copy['n_chunks'] = (copy.tgt_len.max() / copy.tgt_len).astype(int)
reverse['n_chunks'] = (reverse.tgt_len.max() / reverse.tgt_len).astype(int)
retrieval['n_chunks'] = (10 / retrieval.tgt_len).apply(lambda x: np.ceil(x)).astype(int)

# %% [code]
# mt.boxplot('test acc', by='num_mem_tokens', figsize=(10, 6), patch_artist=True, fontsize=16)

# %% [code]
fig, axs = plt.subplots(1, 3, figsize=(32, 6))
letters = ('a', 'b', 'c')
for i, (plot_df, name, letter) in enumerate(zip([copy, reverse, retrieval], ['Copy', 'Reverse', 'Associative retrieval'], letters)):

    fontdict = {'fontsize': 24}
    # fontsize = 28
    legsize = 22

    mt = plot_df[plot_df.num_mem_tokens > 0]
    xl = plot_df[plot_df.mem_len > 0]
    bl = plot_df[(plot_df.num_mem_tokens == 0) & (plot_df.mem_len == 0)]
    mt = pd.concat((mt, bl[bl.n_chunks == 1]))
    xl = pd.concat((xl, bl[bl.n_chunks == 1]))


    markers = ['s', '^', 'o'][::-1]
    dfs = [mt, xl, bl][::-1]
    zorders = [100, 50, 0]
    colors = [(0.7, 0.8, 0.7), (0.7, 0.7, 0.9), (0.9, 0.4, 0.4)]
    for z, d, m, c in zip(zorders, dfs, markers, colors): 
        d = d[(d.mem_len != 6) & (d.num_mem_tokens != 6)]   
        gd = d.groupby('n_chunks').agg({'test acc': tuple})
        gd['mean'] = d.groupby('n_chunks').mean()['test acc']
        gd['std'] = d.groupby('n_chunks').std()['test acc']
        gd = gd.reset_index()

        axs[i].errorbar(gd.n_chunks, gd['mean'], gd['std'], lw=4, color=c, marker=m, markeredgecolor='k', markersize=16, capsize=10, elinewidth=2, zorder=z)

    # axs[i].legend(['Baseline', 'Transformer-XL', 'RMT'], fontsize=legsize)

    # for z, d, m, c in zip(zorders, dfs, markers, colors):    
    #     d = d[(d.mem_len == 6) | (d.num_mem_tokens == 6)]
    #     gd = d.groupby('n_chunks').agg({'test acc': tuple})
    #     gd['mean'] = d.groupby('n_chunks').mean()['test acc']
    #     gd['std'] = d.groupby('n_chunks').std()['test acc']
    #     gd = gd.reset_index()

    #     axs[i].errorbar(gd.n_chunks, gd['mean'], gd['std'], lw=4, color=c, marker=m, markeredgecolor='k', markersize=8, capsize=10, elinewidth=2, zorder=z)

    axs[i].set_xlabel(f'Number of segments\n({letter})', fontdict=fontdict)
    
    ticks = np.unique(mt.n_chunks.astype(int))
    axs[i].set_xticks(ticks)
    axs[i].set_xticklabels(ticks)
    axs[i].set_title(name, fontdict=fontdict)
    axs[i].grid()
    axs[i].tick_params(labelsize=22)
    

axs[1].get_shared_x_axes().join(axs[0], axs[1])
fig.legend(['Baseline', 'Transformer-XL', 'RMT'], fontsize=legsize, loc='upper center', bbox_to_anchor=(0.5, 1.15), ncol=3, fancybox=True)
axs[0].set_ylabel('Accuracy', fontdict=fontdict)
# plt.tight_layout()
# plt.savefig(f'../../Memory transformer/_figures_paper/res_combined.png', format='png')

# %% [code]
fig, axs = plt.subplots(2, 1, figsize=(12, 12))
letters = ('a', 'b', 'c')
for i, (plot_df, name, letter) in enumerate(zip([copy, reverse], ['Copy', 'Reverse'], letters)):

    plot_df = plot_df[plot_df.mem_size < plot_df.tgt_len]

    fontdict = {'fontsize': 24}
    # fontsize = 28
    legsize = 22

    mt = plot_df[plot_df.num_mem_tokens > 0]
    xl = plot_df[plot_df.mem_len > 0]
    bl = plot_df[(plot_df.num_mem_tokens == 0) & (plot_df.mem_len == 0)]
    mt = pd.concat((mt, bl[bl.n_chunks == 1]))
    xl = pd.concat((xl, bl[bl.n_chunks == 1]))


    markers = ['^', 's']
    dfs = [xl, mt]
    zorders = [50, 0]
    colors = [ (0.7, 0.7, 0.9), (0.9, 0.4, 0.4)]
    for z, d, m, c in zip(zorders, dfs, markers, colors): 
        gd = d.groupby('n_chunks').agg({'test acc': tuple})
        gd['mean'] = d.groupby('n_chunks').mean()['test acc']
        gd['std'] = d.groupby('n_chunks').std()['test acc']
        gd = gd.reset_index()

        axs[i].errorbar(gd.n_chunks, gd['mean'], gd['std'], lw=4, color=c, marker=m, markeredgecolor='k', markersize=16, capsize=10, elinewidth=2, zorder=z)

    # axs[i].legend(['Baseline', 'Transformer-XL', 'RMT'], fontsize=legsize)

    # for z, d, m, c in zip(zorders, dfs, markers, colors):    
    #     d = d[(d.mem_len == 6) | (d.num_mem_tokens == 6)]
    #     gd = d.groupby('n_chunks').agg({'test acc': tuple})
    #     gd['mean'] = d.groupby('n_chunks').mean()['test acc']
    #     gd['std'] = d.groupby('n_chunks').std()['test acc']
    #     gd = gd.reset_index()

    #     axs[i].errorbar(gd.n_chunks, gd['mean'], gd['std'], lw=4, color=c, marker=m, markeredgecolor='k', markersize=8, capsize=10, elinewidth=2, zorder=z)

    
    
    ticks = np.unique(mt.n_chunks.astype(int))
    axs[i].set_xticks(ticks)
    axs[i].set_xticklabels(ticks)
    axs[i].set_title(name, fontdict=fontdict)
    axs[i].grid()
    axs[i].tick_params(labelsize=22)
    axs[i].set_ylabel('Accuracy', fontdict=fontdict)
    
axs[-1].set_xlabel('Number of segments', fontdict=fontdict)
# axs[1].get_shared_y_axes().join(axs[0], axs[1])
fig.legend(['Transformer-XL', 'RMT'], fontsize=legsize, loc='upper center', bbox_to_anchor=(0.5, 1.05), ncol=3, fancybox=True)

plt.tight_layout()
# plt.savefig(f'../../Memory transformer/_figures_paper/res_combined.png', format='png')

# %% [code]
plot_df = copy

fontdict = {'fontsize': 18}

mt = plot_df[plot_df.num_mem_tokens > 0]
xl = plot_df[plot_df.mem_len > 0]
bl = plot_df[(plot_df.num_mem_tokens == 0) & (plot_df.mem_len == 0)]
mt = pd.concat((mt, bl[bl.n_chunks == 1]))
xl = pd.concat((xl, bl[bl.n_chunks == 1]))


fig = plt.figure(figsize=(8, 5))

markers = ['s', '^', 'o'][::-1]
dfs = [mt, xl, bl][::-1]
zorders = [100, 50, 0]
colors = [(0.9, 0.9, 1), (0.75, 0.4, 0.4), (0.7, 0.7, 1)]
for z, d, m, c in zip(zorders, dfs, markers, colors): 
    d = d[(d.mem_len != 6) & (d.num_mem_tokens != 6)]   
    gd = d.groupby('n_chunks').agg({'test acc': tuple})
    gd['mean'] = d.groupby('n_chunks').mean()['test acc']
    gd['std'] = d.groupby('n_chunks').std()['test acc']
    gd = gd.reset_index()

    plt.errorbar(gd.n_chunks, gd['mean'], gd['std'], lw=4, color=c, marker=m, markeredgecolor='k', markersize=16, capsize=10, elinewidth=2, zorder=z)

plt.legend(['Baseline', 'Transformer-XL', 'RMT'], fontsize=16)

for z, d, m, c in zip(zorders, dfs, markers, colors):    
    d = d[(d.mem_len == 6) | (d.num_mem_tokens == 6)]
    gd = d.groupby('n_chunks').agg({'test acc': tuple})
    gd['mean'] = d.groupby('n_chunks').mean()['test acc']
    gd['std'] = d.groupby('n_chunks').std()['test acc']
    gd = gd.reset_index()

    plt.errorbar(gd.n_chunks, gd['mean'], gd['std'], lw=4, color=c, marker=m, markeredgecolor='k', markersize=8, capsize=10, elinewidth=2, zorder=z)


plt.xlabel('Number of segments', fontdict=fontdict)
plt.ylabel('Accuracy', fontdict=fontdict)
ticks = np.unique(mt.n_chunks.astype(int))
plt.xticks(ticks, labels=ticks)
plt.grid()
plt.savefig('../../Memory transformer/_figures_paper/res_copy.png', format='png')
plt.show()


# %% [code]
plot_df = reverse

fontdict = {'fontsize': 18}

mt = plot_df[plot_df.num_mem_tokens > 0]
xl = plot_df[plot_df.mem_len > 0]
bl = plot_df[(plot_df.num_mem_tokens == 0) & (plot_df.mem_len == 0)]
mt = pd.concat((mt, bl[bl.n_chunks == 1]))
xl = pd.concat((xl, bl[bl.n_chunks == 1]))


fig = plt.figure(figsize=(8, 5))

markers = ['s', '^', 'o'][::-1]
dfs = [mt, xl, bl][::-1]
zorders = [100, 50, 0]
colors = [(0.9, 0.9, 1), (0.75, 0.4, 0.4), (0.7, 0.7, 1)]
for z, d, m, c in zip(zorders, dfs, markers, colors): 
    d = d[(d.mem_len != 6) & (d.num_mem_tokens != 6)]   
    gd = d.groupby('n_chunks').agg({'test acc': tuple})
    gd['mean'] = d.groupby('n_chunks').mean()['test acc']
    gd['std'] = d.groupby('n_chunks').std()['test acc']
    gd = gd.reset_index()

    plt.errorbar(gd.n_chunks, gd['mean'], gd['std'], lw=4, color=c, marker=m, markeredgecolor='k', markersize=16, capsize=10, elinewidth=2, zorder=z)

plt.legend(['Baseline', 'Transformer-XL', 'RMT'], fontsize=16)

for z, d, m, c in zip(zorders, dfs, markers, colors):    
    d = d[(d.mem_len == 6) | (d.num_mem_tokens == 6)]
    gd = d.groupby('n_chunks').agg({'test acc': tuple})
    gd['mean'] = d.groupby('n_chunks').mean()['test acc']
    gd['std'] = d.groupby('n_chunks').std()['test acc']
    gd = gd.reset_index()

    plt.errorbar(gd.n_chunks, gd['mean'], gd['std'], lw=4, color=c, marker=m, markeredgecolor='k', markersize=8, capsize=10, elinewidth=2, zorder=z)

plt.xlabel('Number of segments', fontdict=fontdict)
plt.ylabel('Accuracy', fontdict=fontdict)
ticks = np.unique(mt.n_chunks.astype(int))
plt.xticks(ticks, labels=ticks)
plt.grid()
plt.savefig('../../Memory transformer/_figures_paper/res_reverse.png', format='png')
plt.show()

# %% [code]
plot_df = retrieval

fontdict = {'fontsize': 18}

mt = plot_df[plot_df.num_mem_tokens > 0]
xl = plot_df[plot_df.mem_len > 0]
bl = plot_df[(plot_df.num_mem_tokens == 0) & (plot_df.mem_len == 0)]
mt = pd.concat((mt, bl[bl.n_chunks == 1]))
xl = pd.concat((xl, bl[bl.n_chunks == 1]))


fig = plt.figure(figsize=(8, 5))

markers = ['s', '^', 'o'][::-1]
dfs = [mt, xl, bl][::-1]
zorders = [100, 50, 0]
colors = [(0.9, 0.9, 1), (0.75, 0.4, 0.4), (0.7, 0.7, 1)]
for z, d, m, c in zip(zorders, dfs, markers, colors):
    gd = d.groupby('n_chunks').agg({'test acc': tuple})
    gd['mean'] = d.groupby('n_chunks').mean()['test acc']
    gd['std'] = d.groupby('n_chunks').std()['test acc']
    gd = gd.reset_index()
    plt.errorbar(gd.n_chunks, gd['mean'], gd['std'], lw=4, color=c, marker=m, markeredgecolor='k', markersize=12, capsize=10, elinewidth=2, zorder=z)

plt.legend(['Baseline', 'Transformer-XL', 'RMT'], fontsize=16)

plt.xlabel('Number of segments', fontdict=fontdict)
plt.ylabel('Accuracy', fontdict=fontdict)
ticks = np.unique(mt.n_chunks.astype(int))
plt.xticks(ticks, labels=ticks)
plt.grid()
plt.savefig('../../Memory transformer/_figures_paper/res_retrieval.png', format='png')
plt.show()
