# Supplementary material
Source: ML conference proceedings conference paper supplement (https://proceedings.neurips.cc/paper_files/paper/2022/hash/47e288629a6996a17ce50b90a056a0e1-Abstract.html)

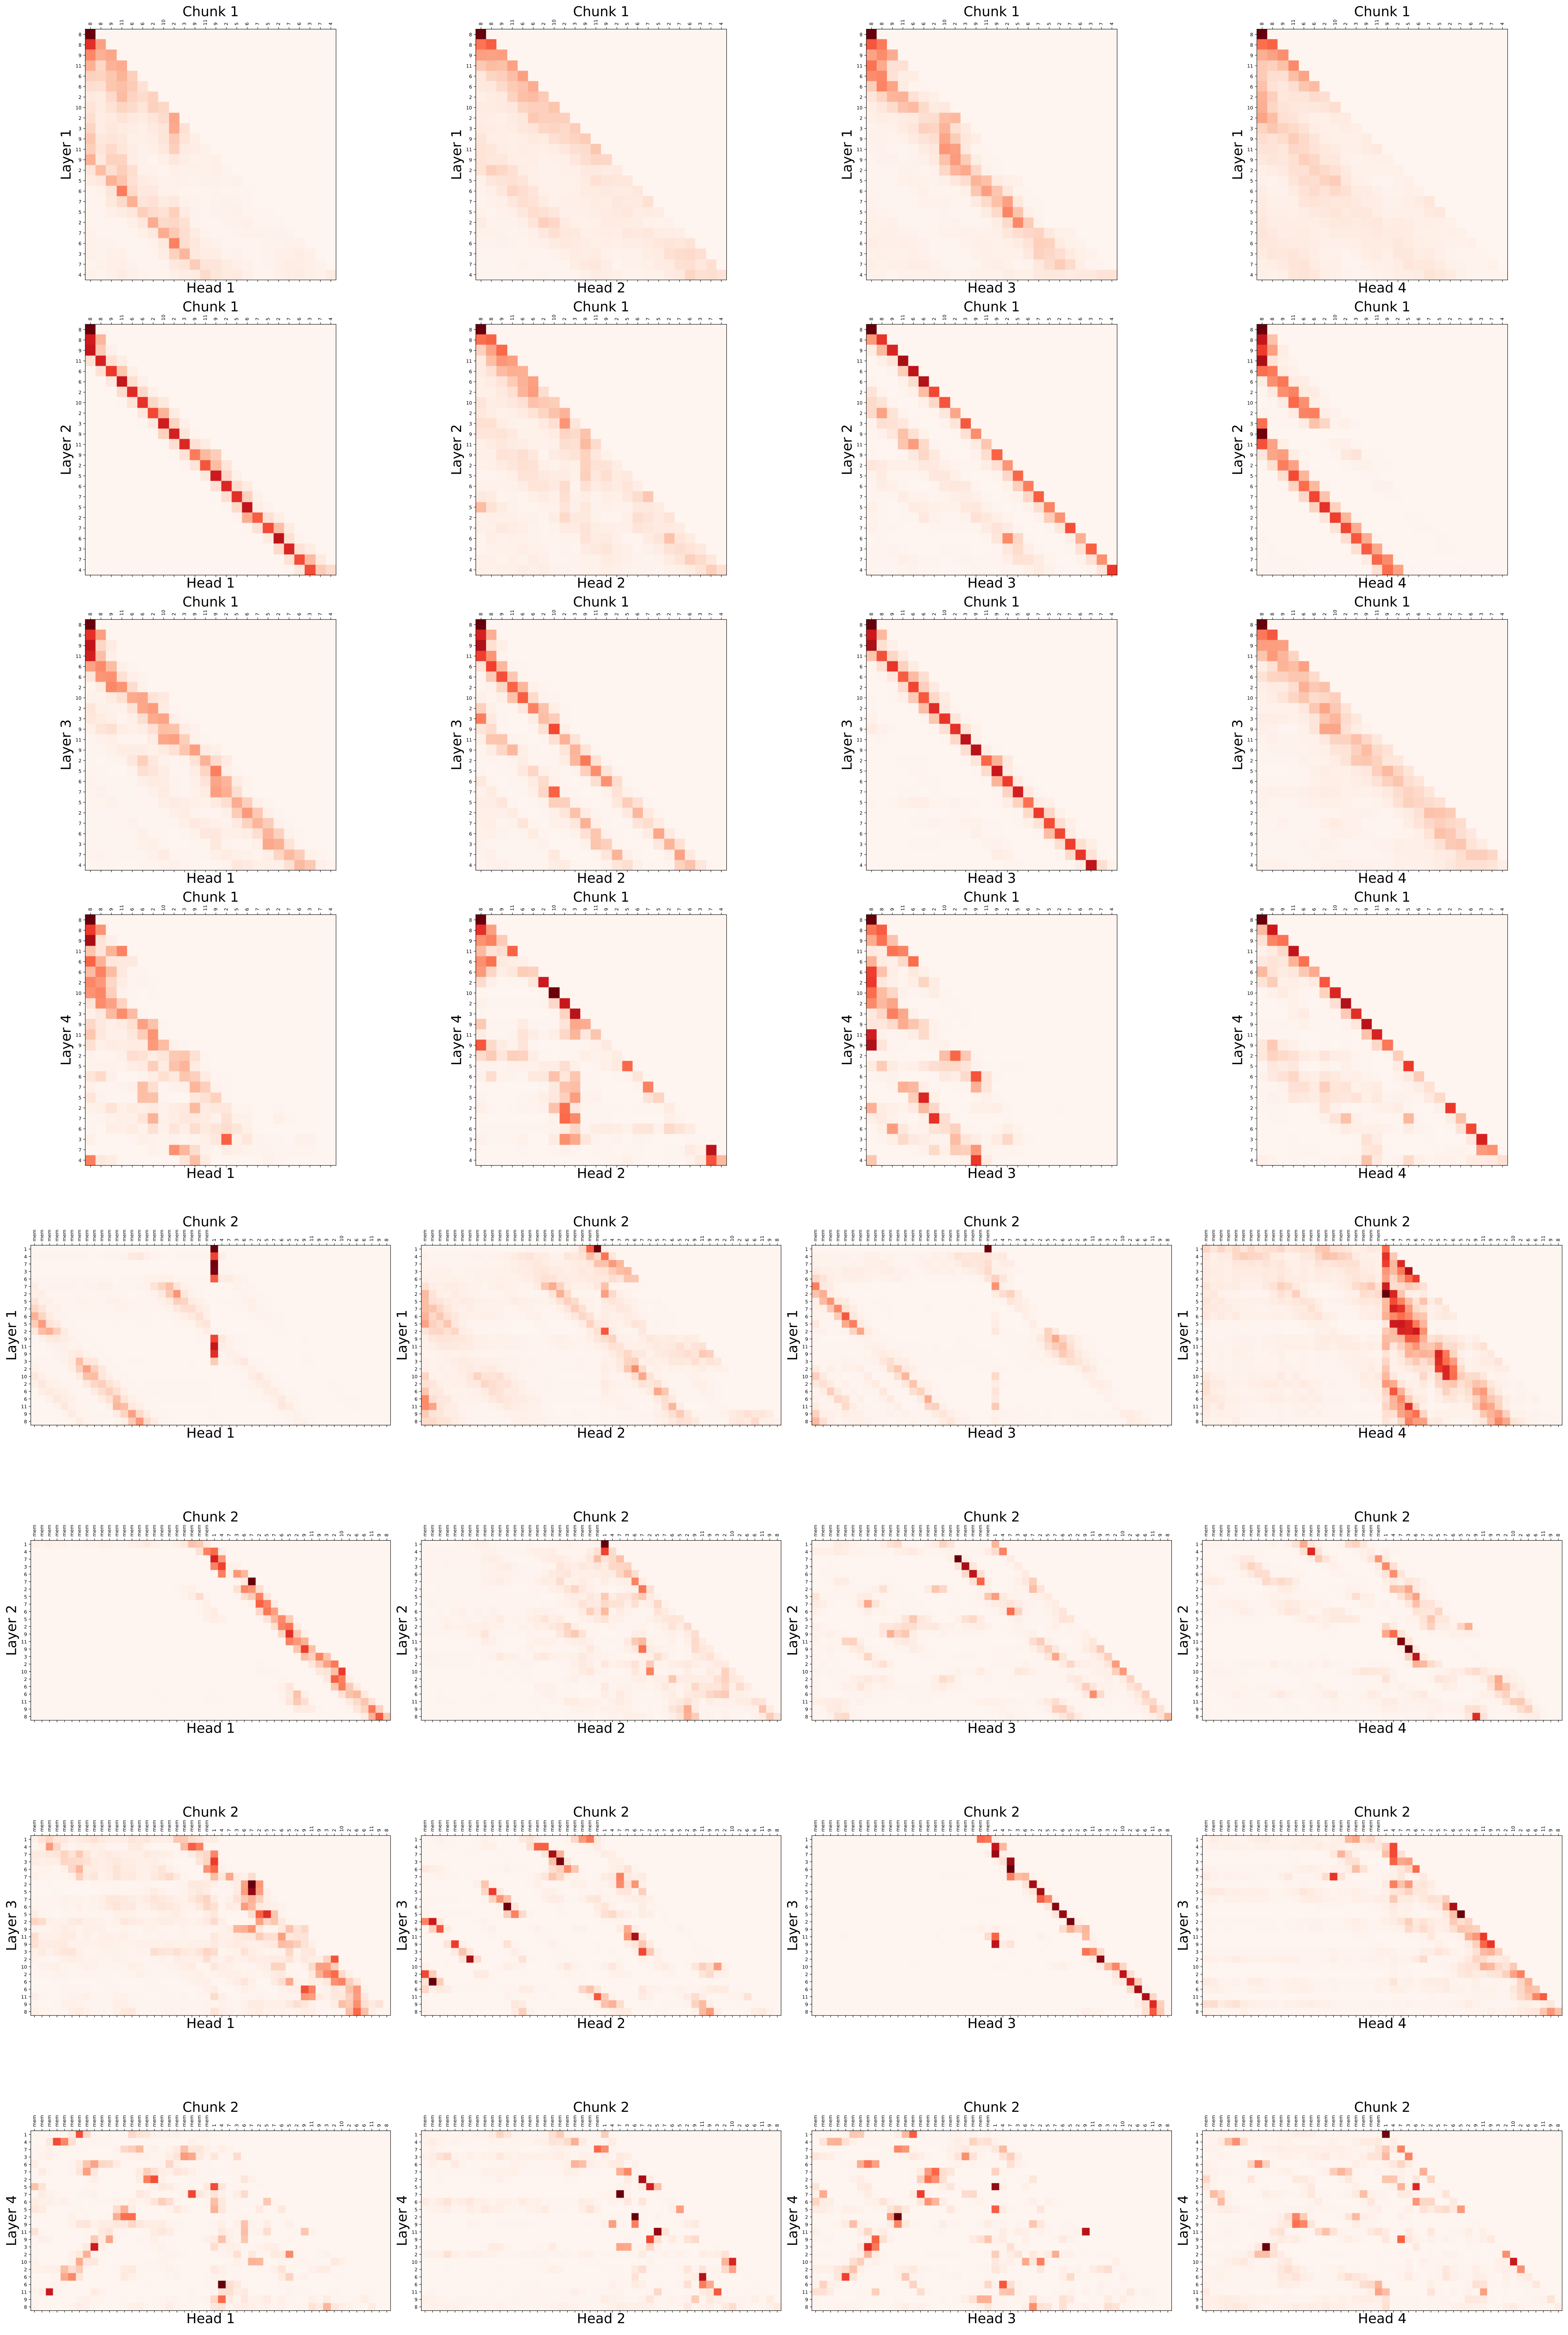

Supplement: Supplementary file 1 [file 47e288629a6996a17ce50b90a056a0e1-Supplemental-Conference.zip › RMT_supp/attention_maps/reverse_tl24xl24.pdf]

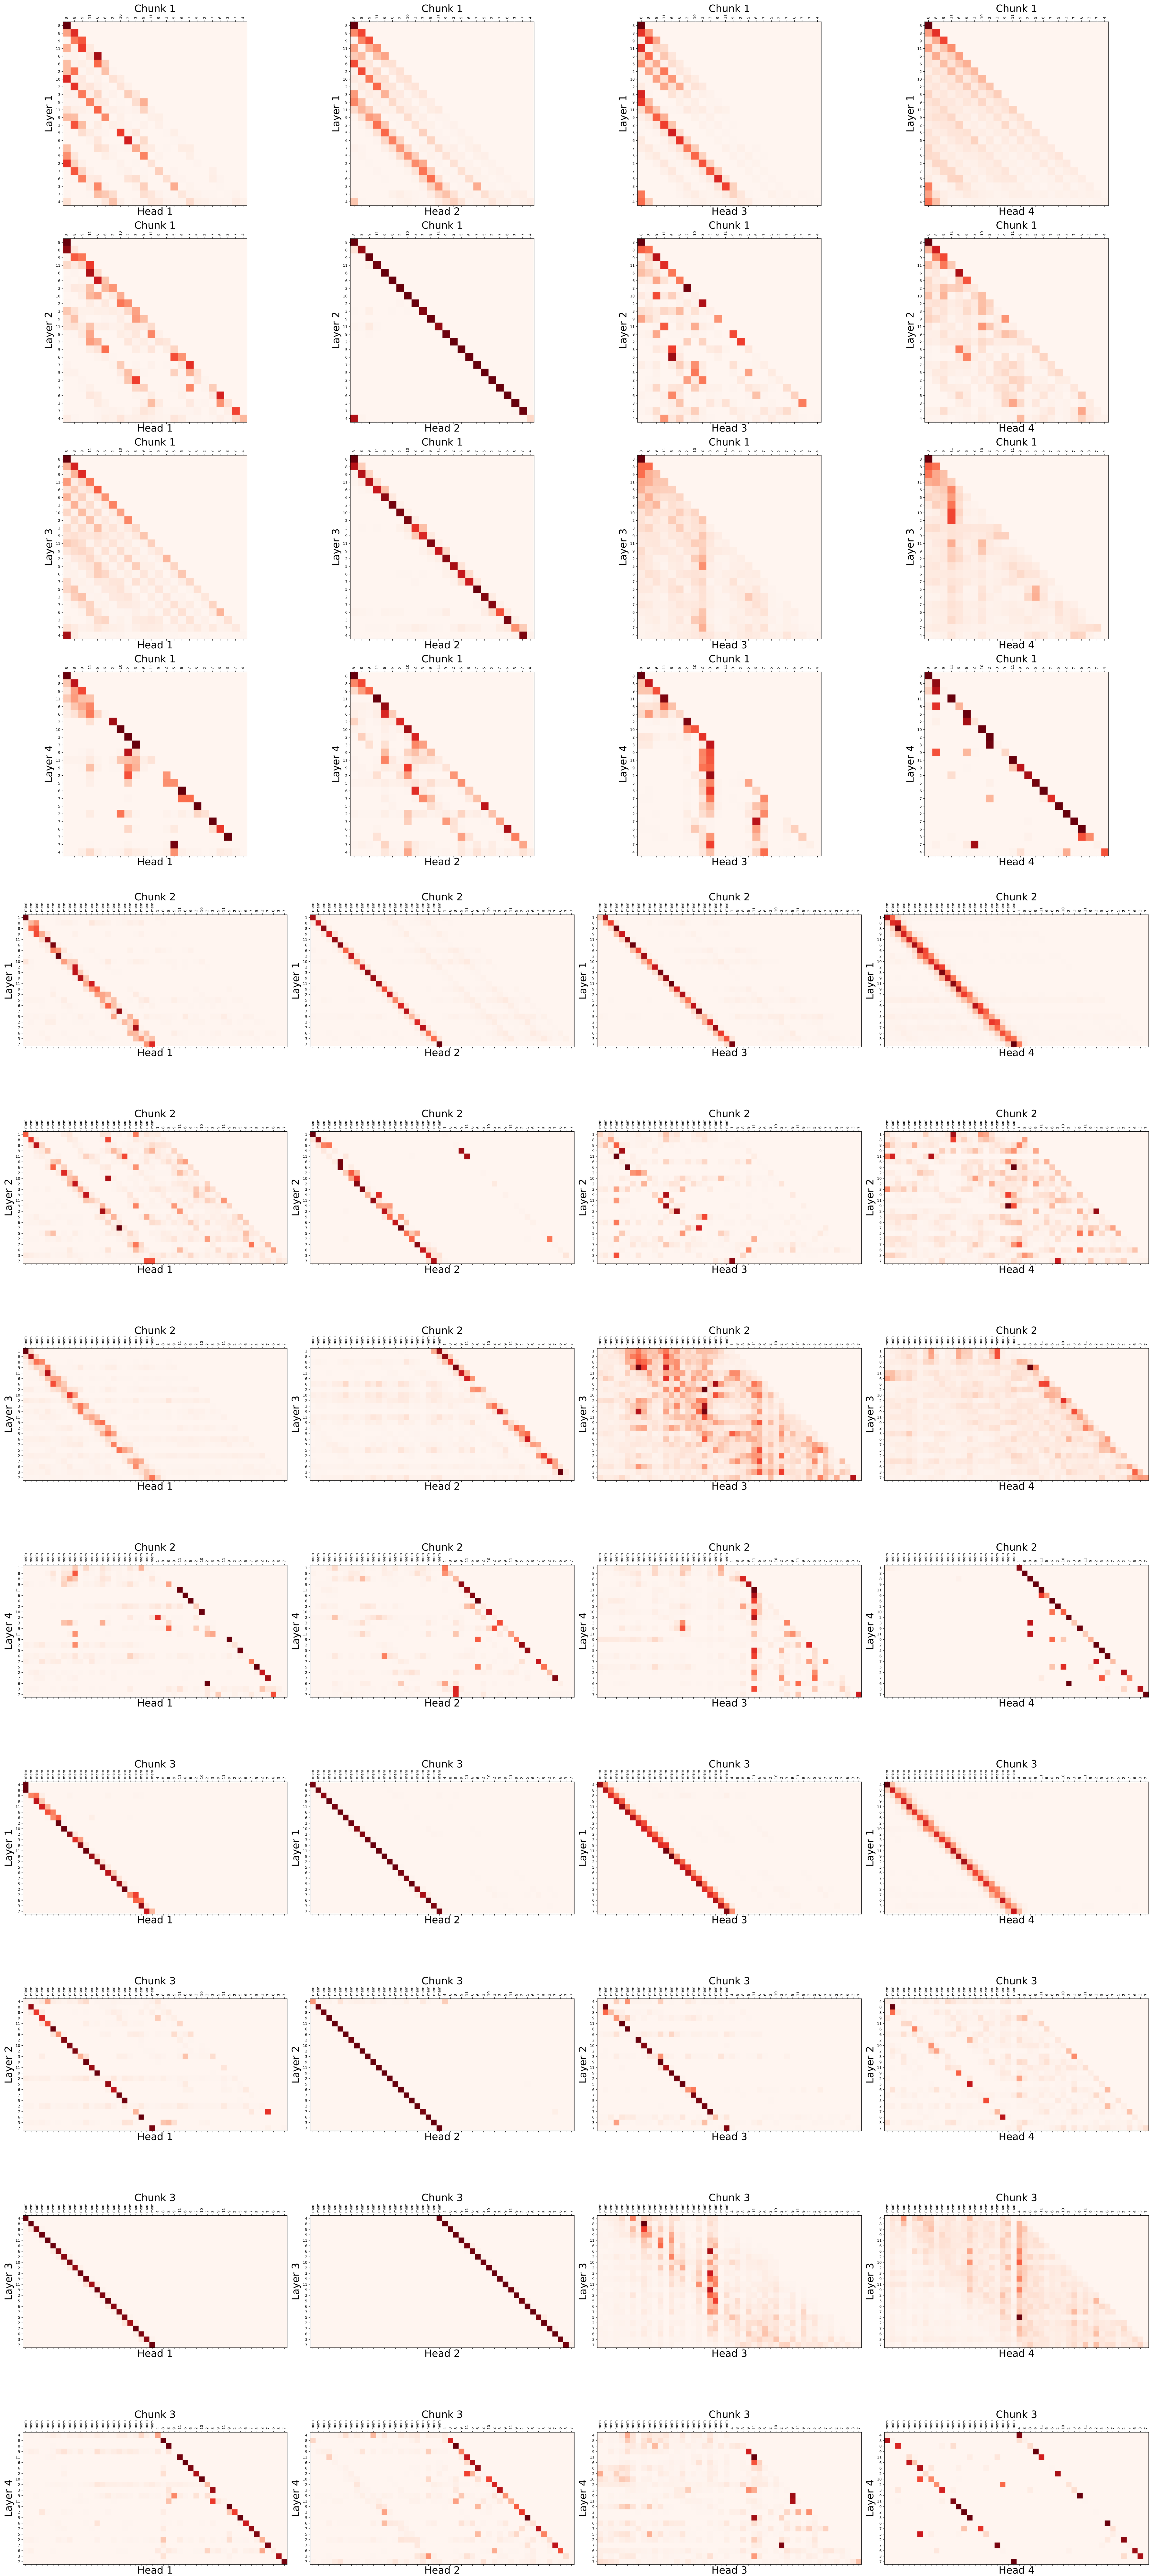

Supplement: Supplementary file 1 [file 47e288629a6996a17ce50b90a056a0e1-Supplemental-Conference.zip › RMT_supp/attention_maps/copy_tl24xl24.pdf]

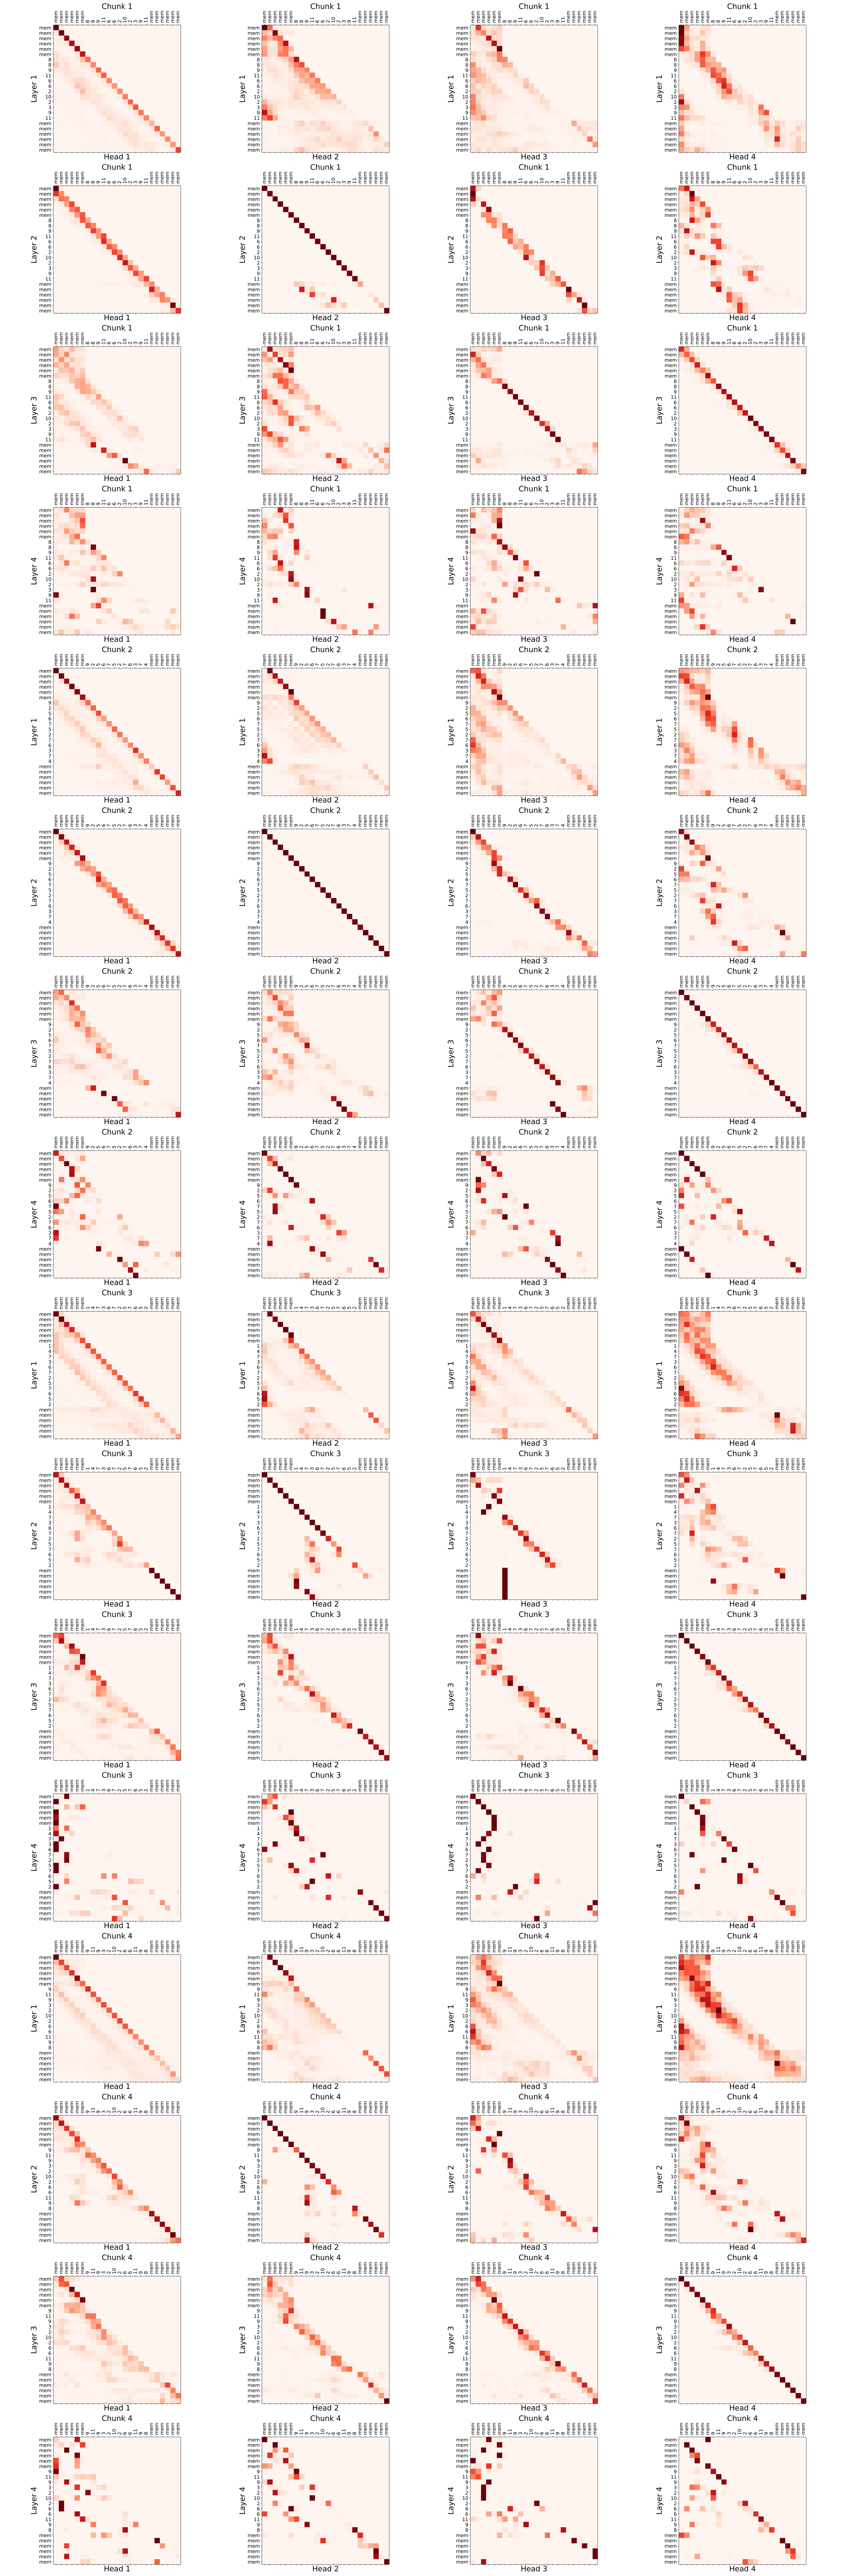

Supplement: Supplementary file 1 [file 47e288629a6996a17ce50b90a056a0e1-Supplemental-Conference.zip › RMT_supp/attention_maps/reverse_tl12mt6.pdf]

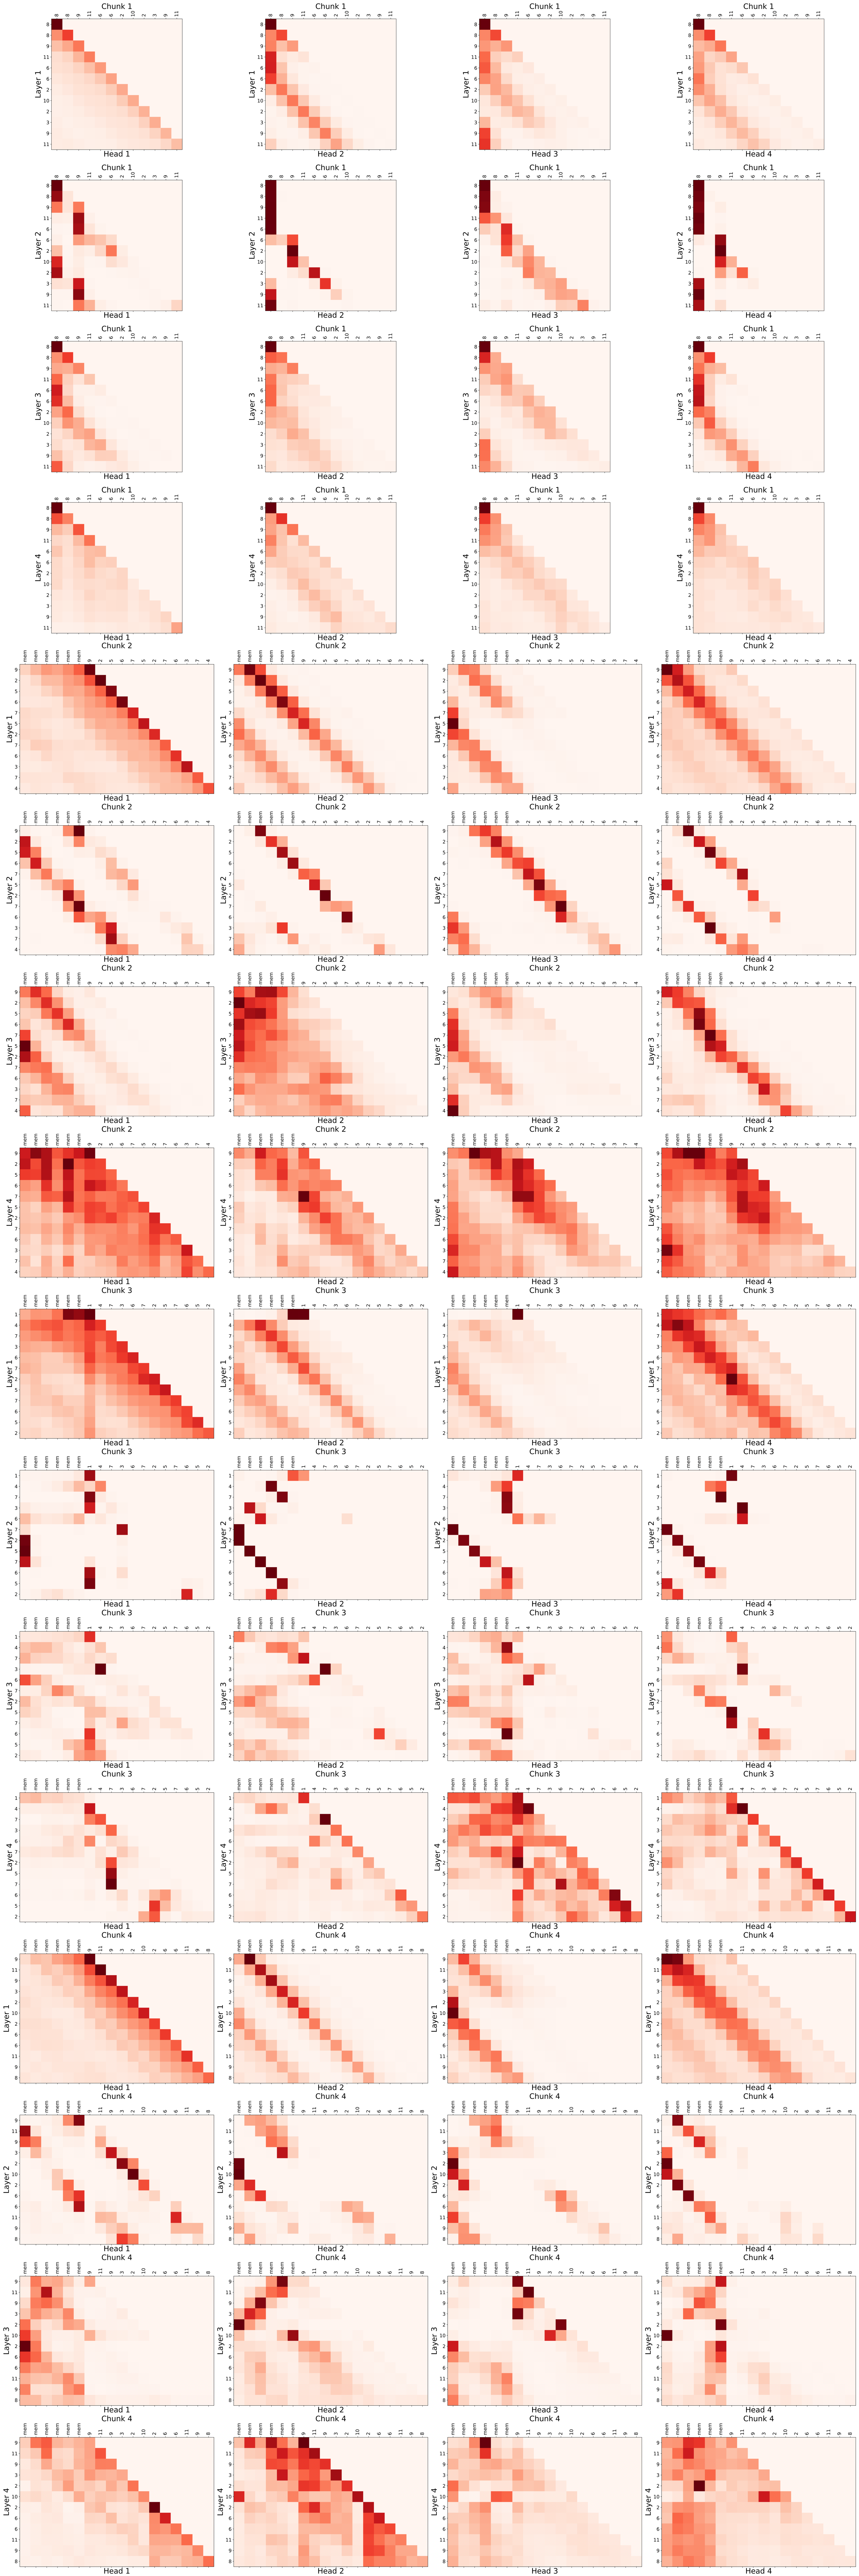

Supplement: Supplementary file 1 [file 47e288629a6996a17ce50b90a056a0e1-Supplemental-Conference.zip › RMT_supp/attention_maps/reverse_tl12xl6.pdf]

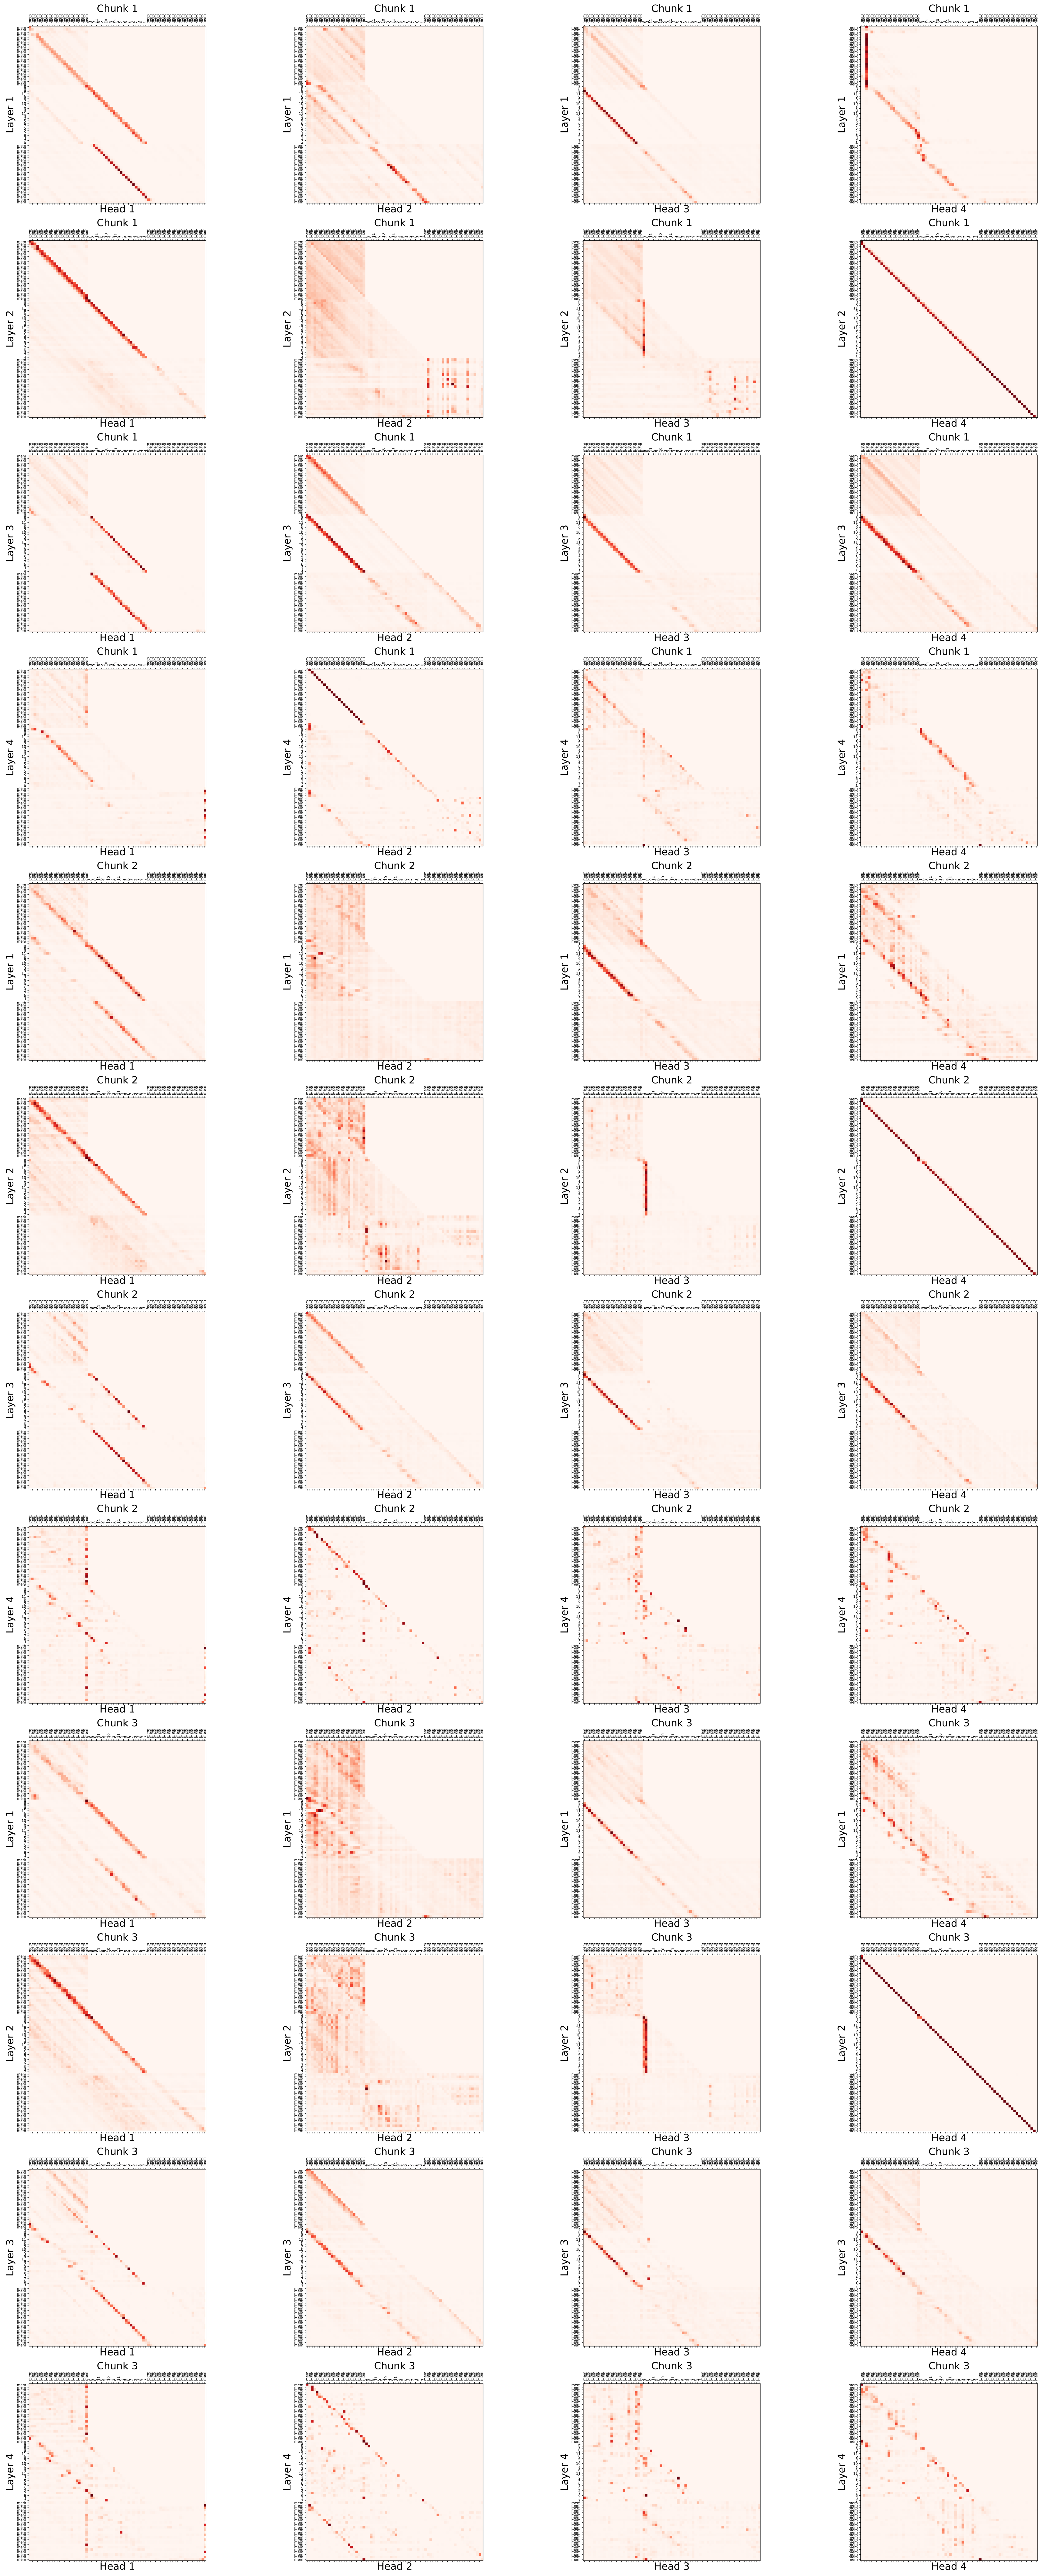

Supplement: Supplementary file 1 [file 47e288629a6996a17ce50b90a056a0e1-Supplemental-Conference.zip › RMT_supp/attention_maps/copy_tl24mt24.pdf]

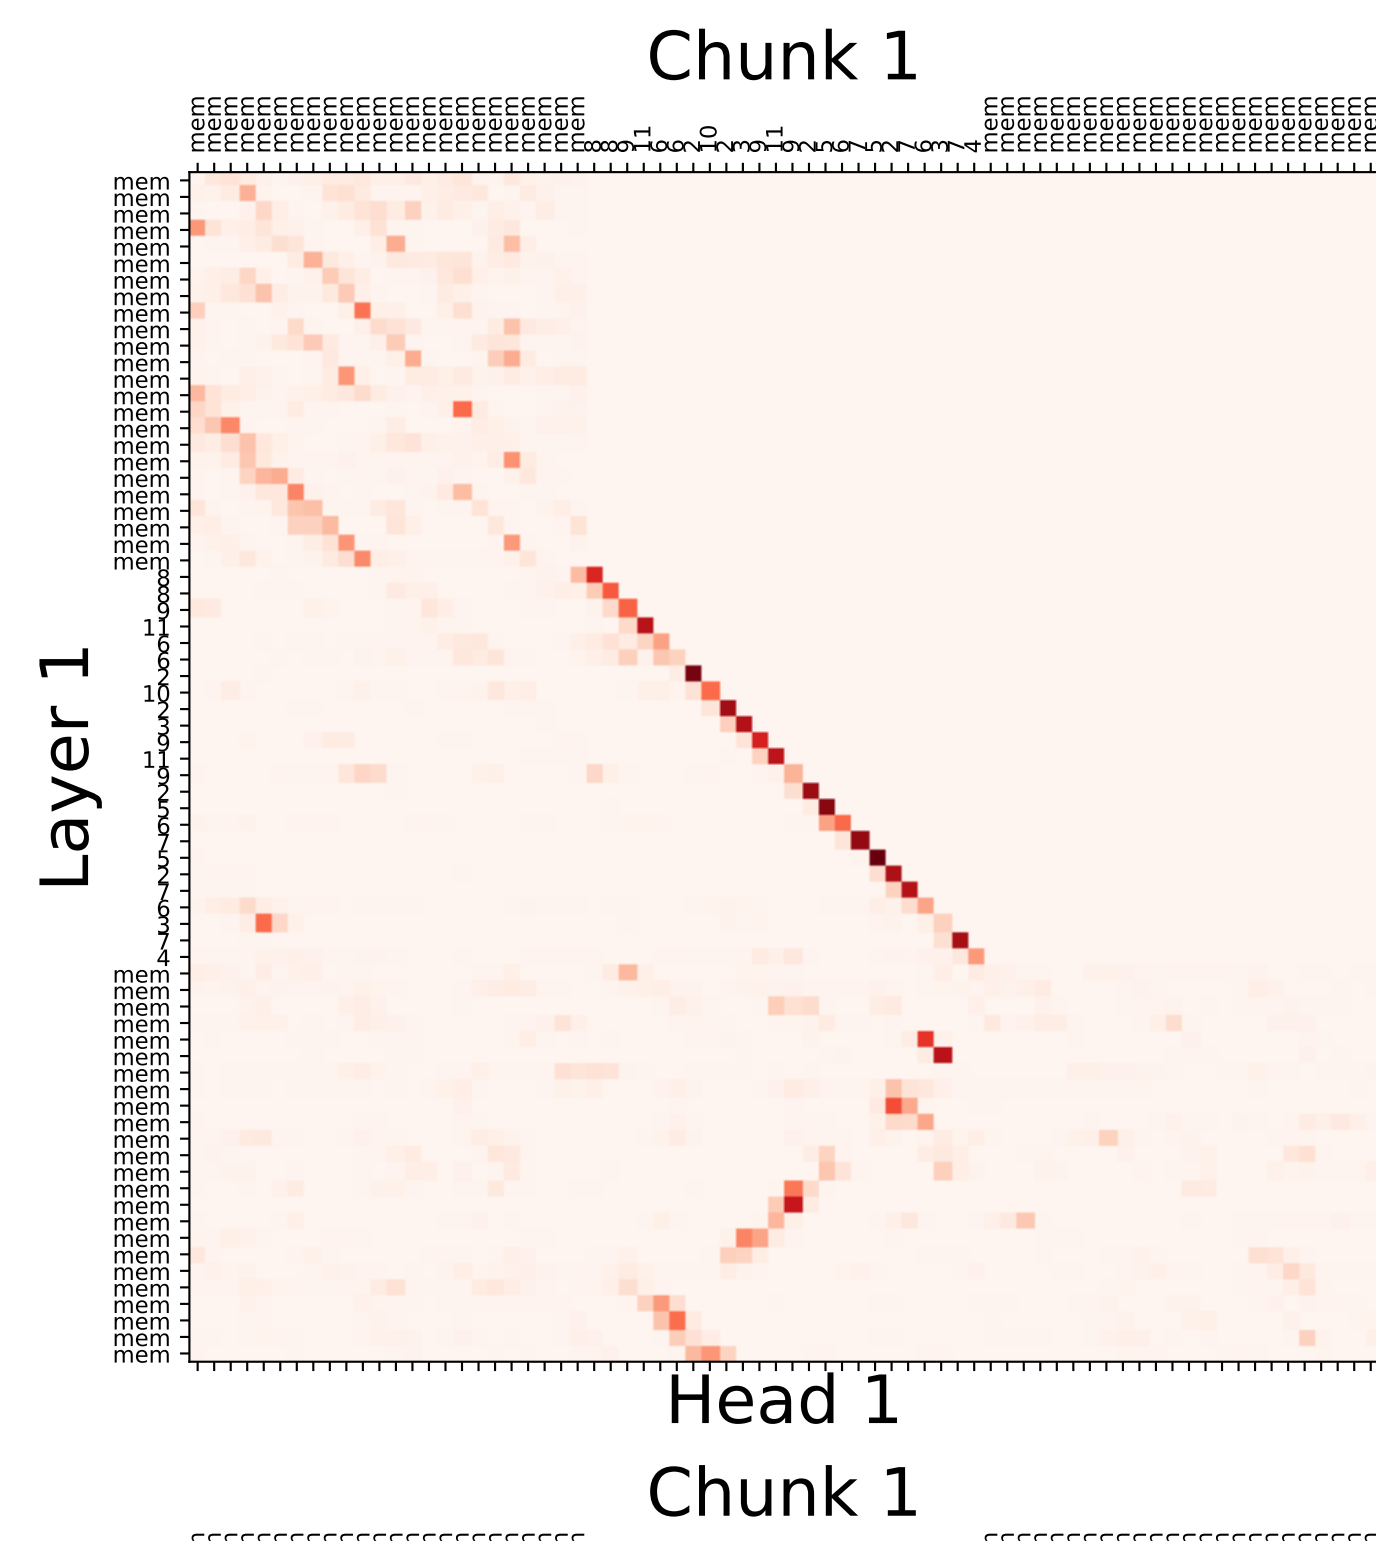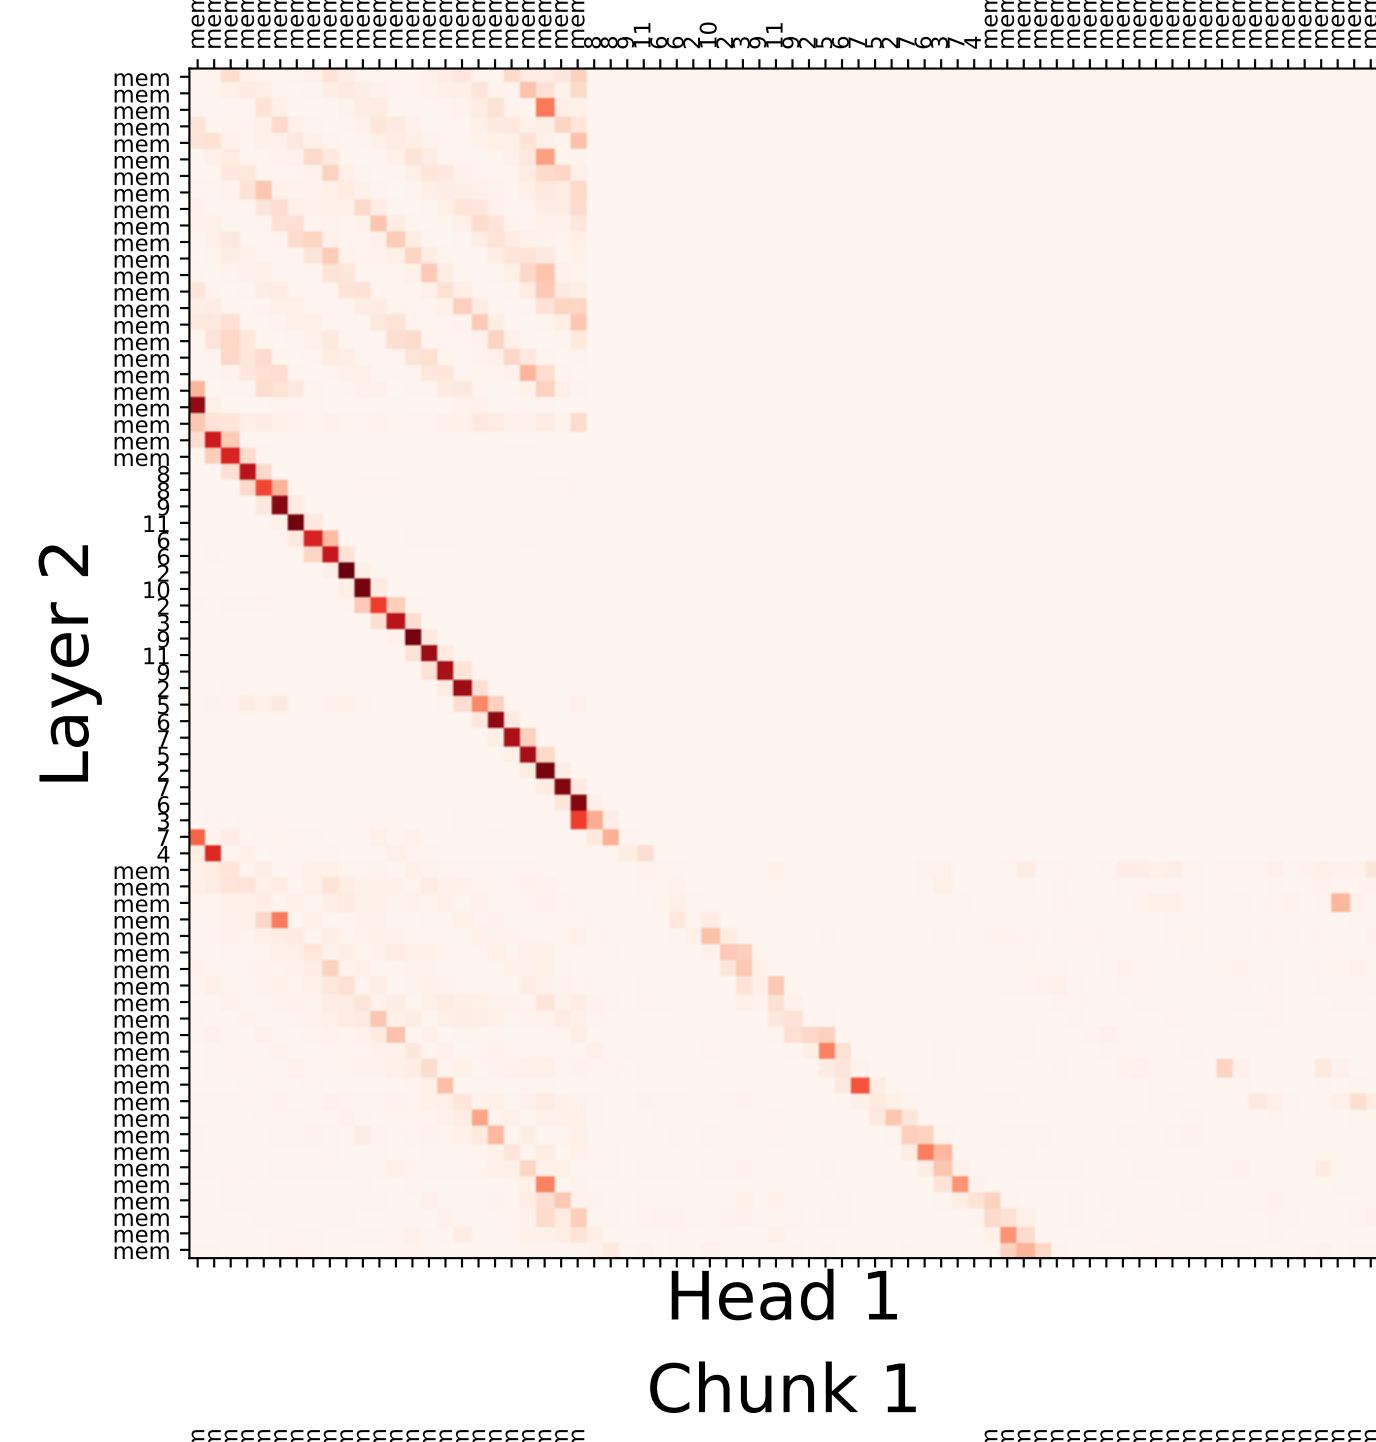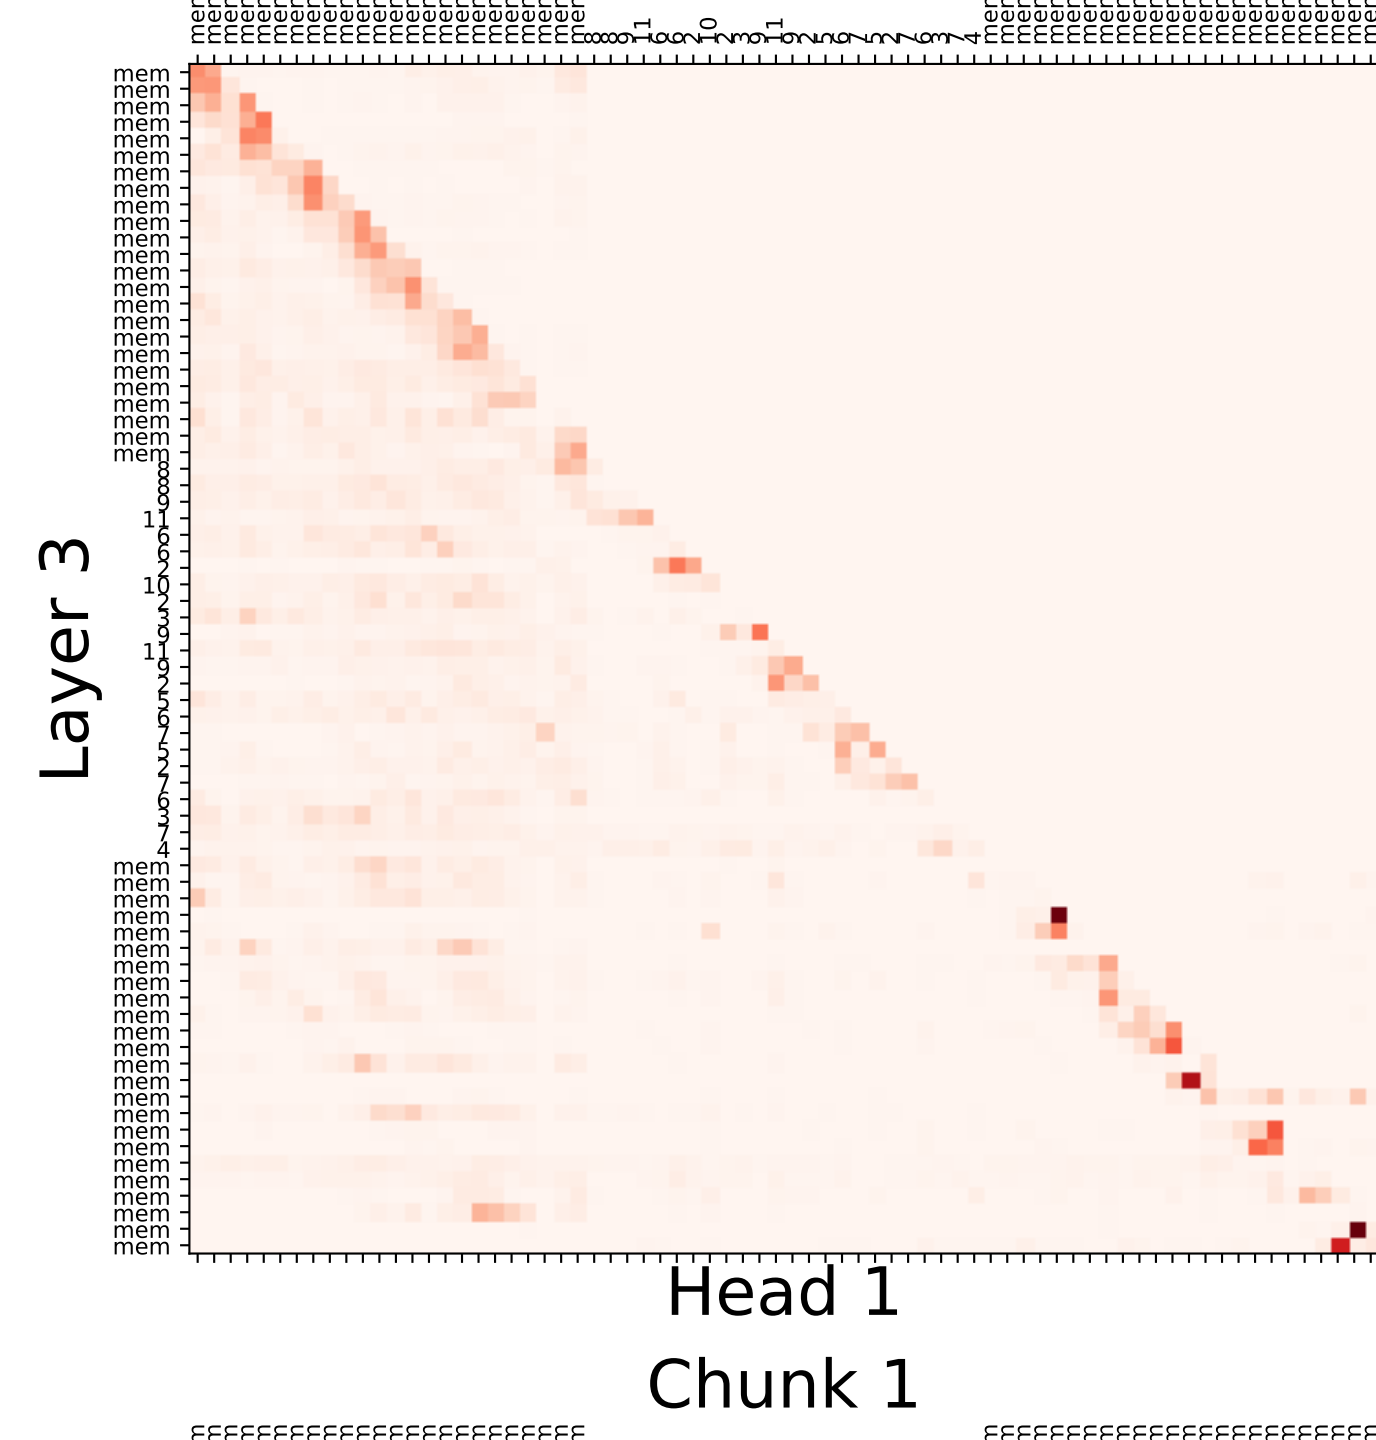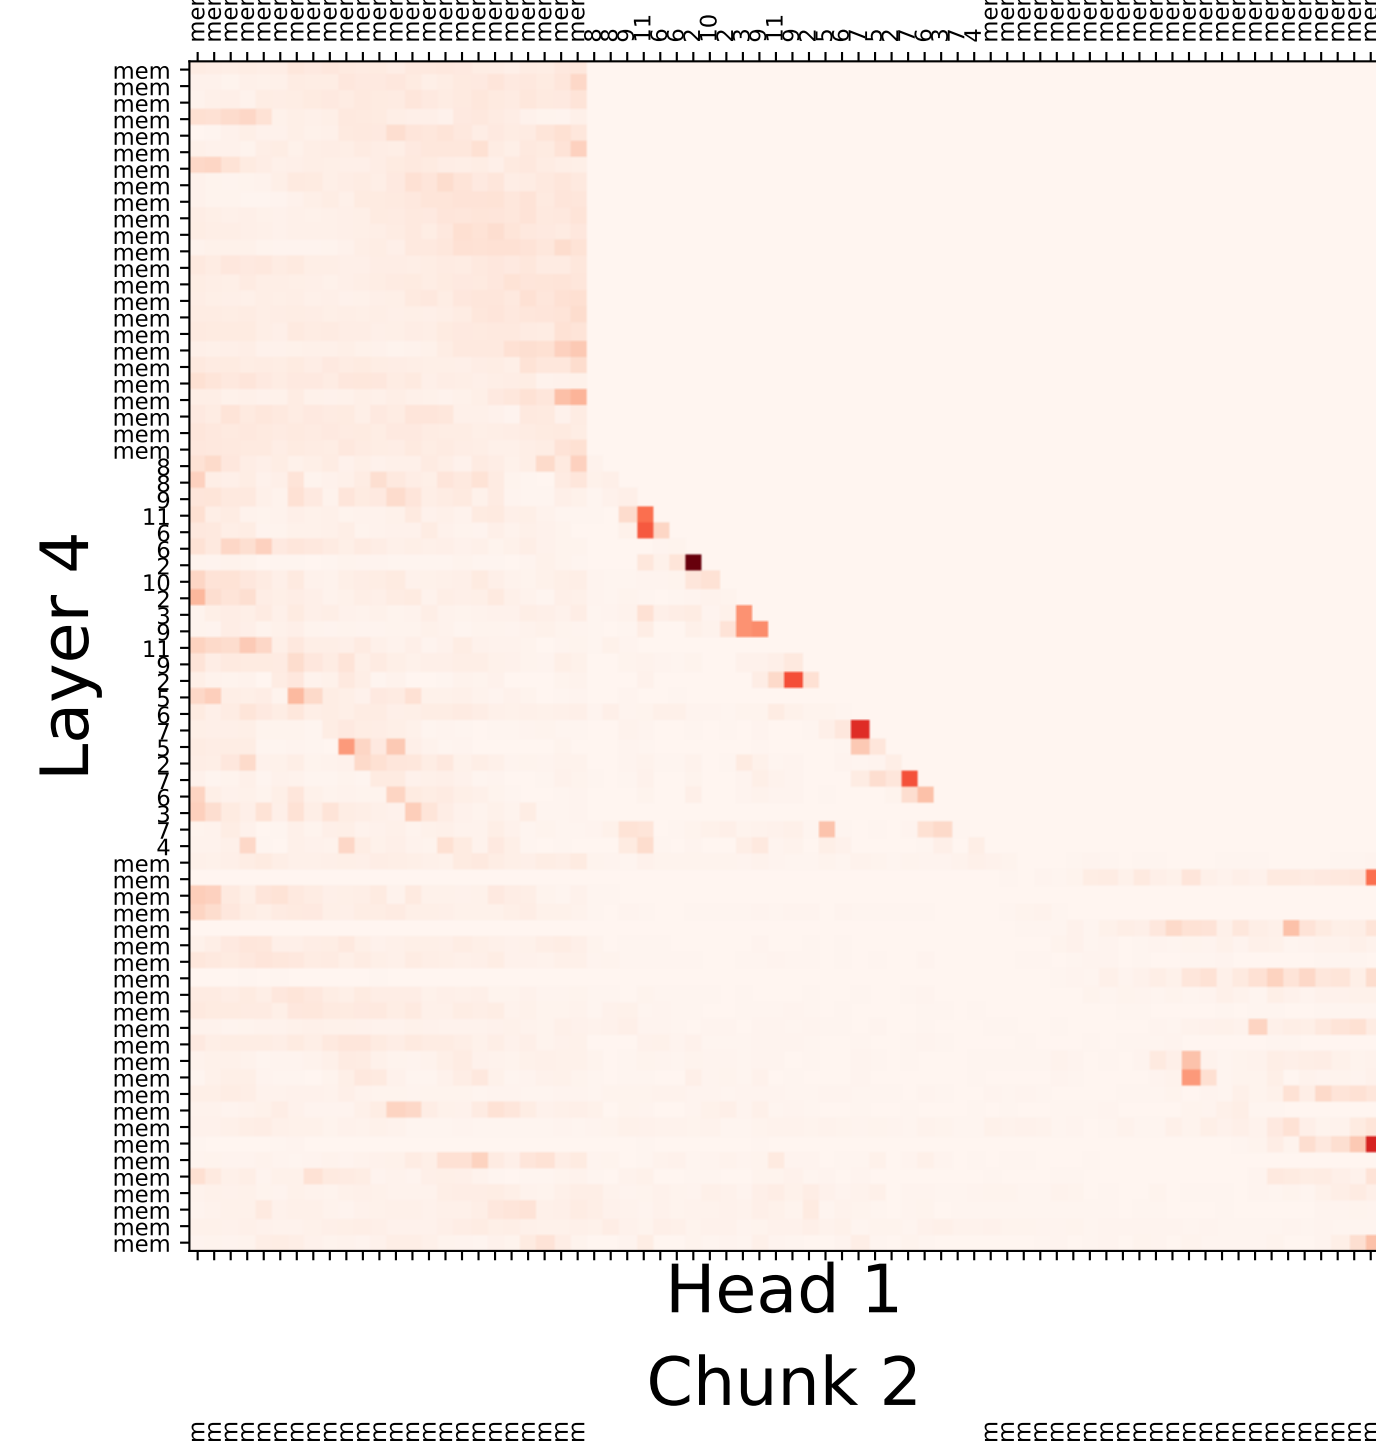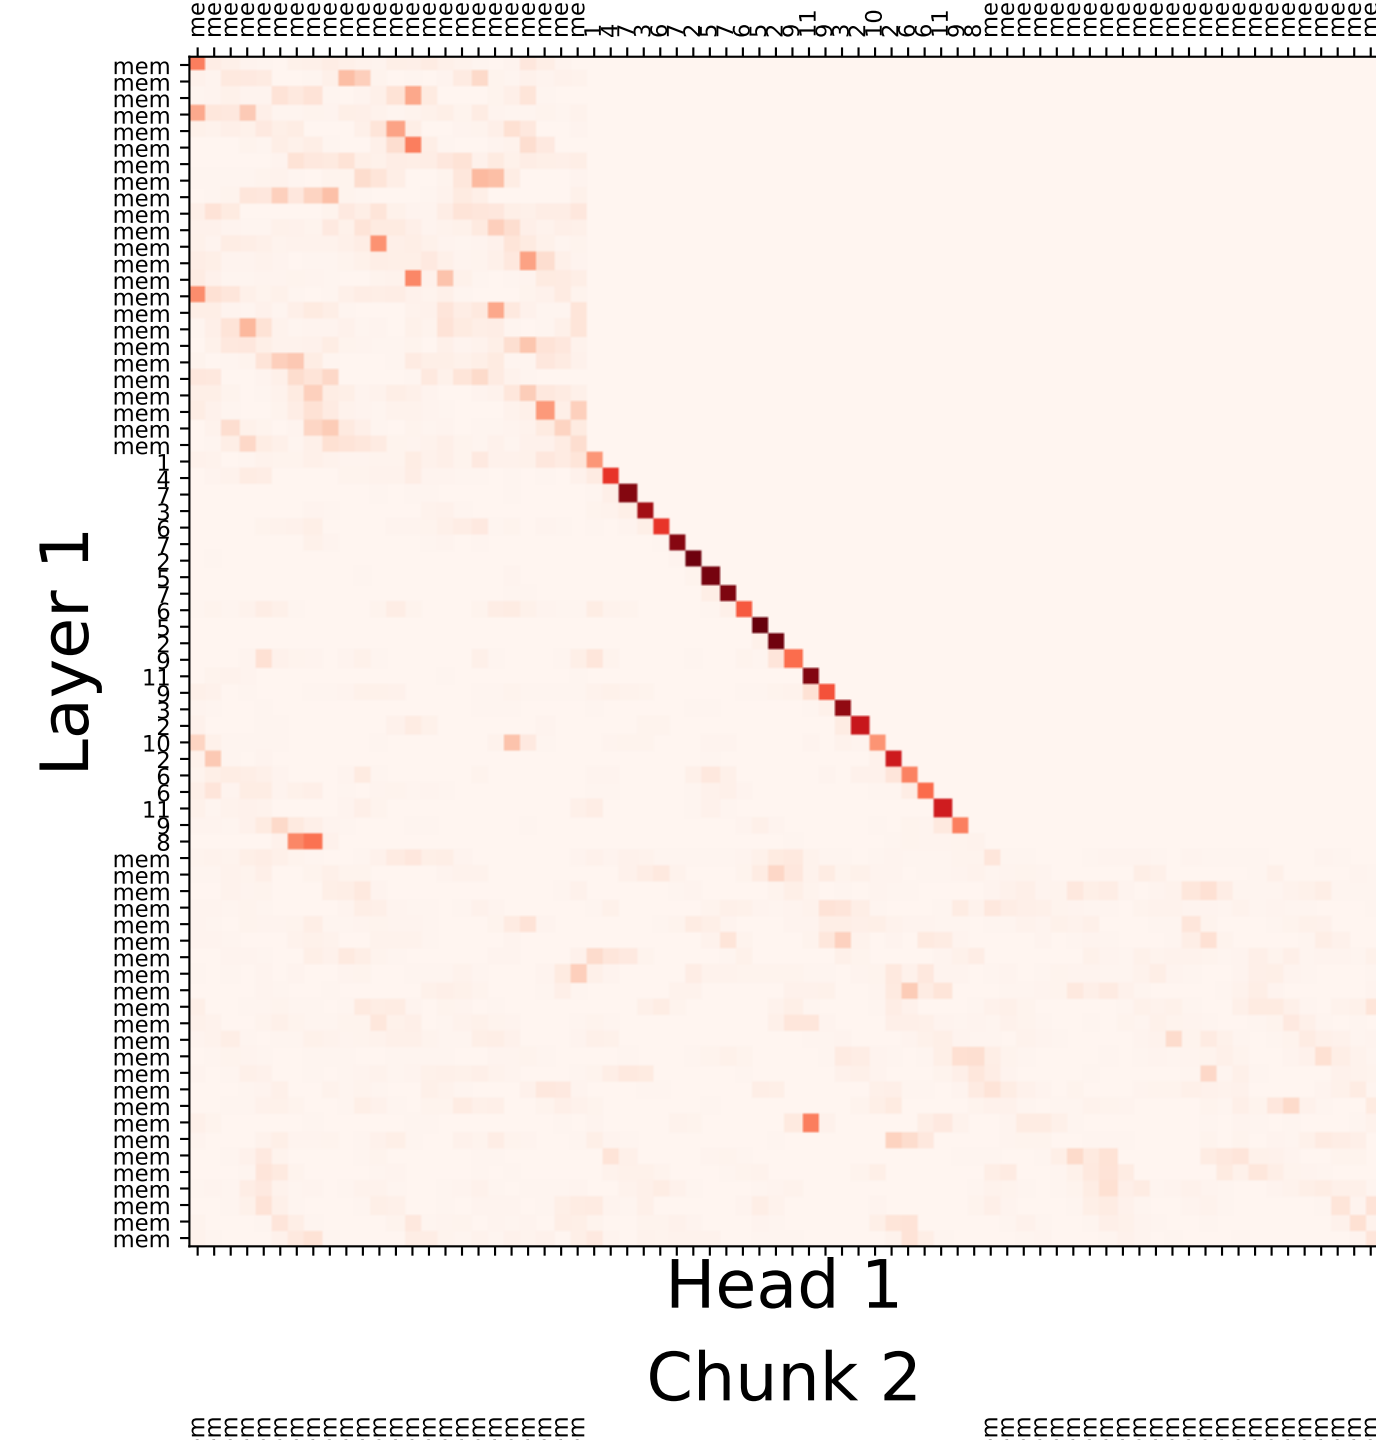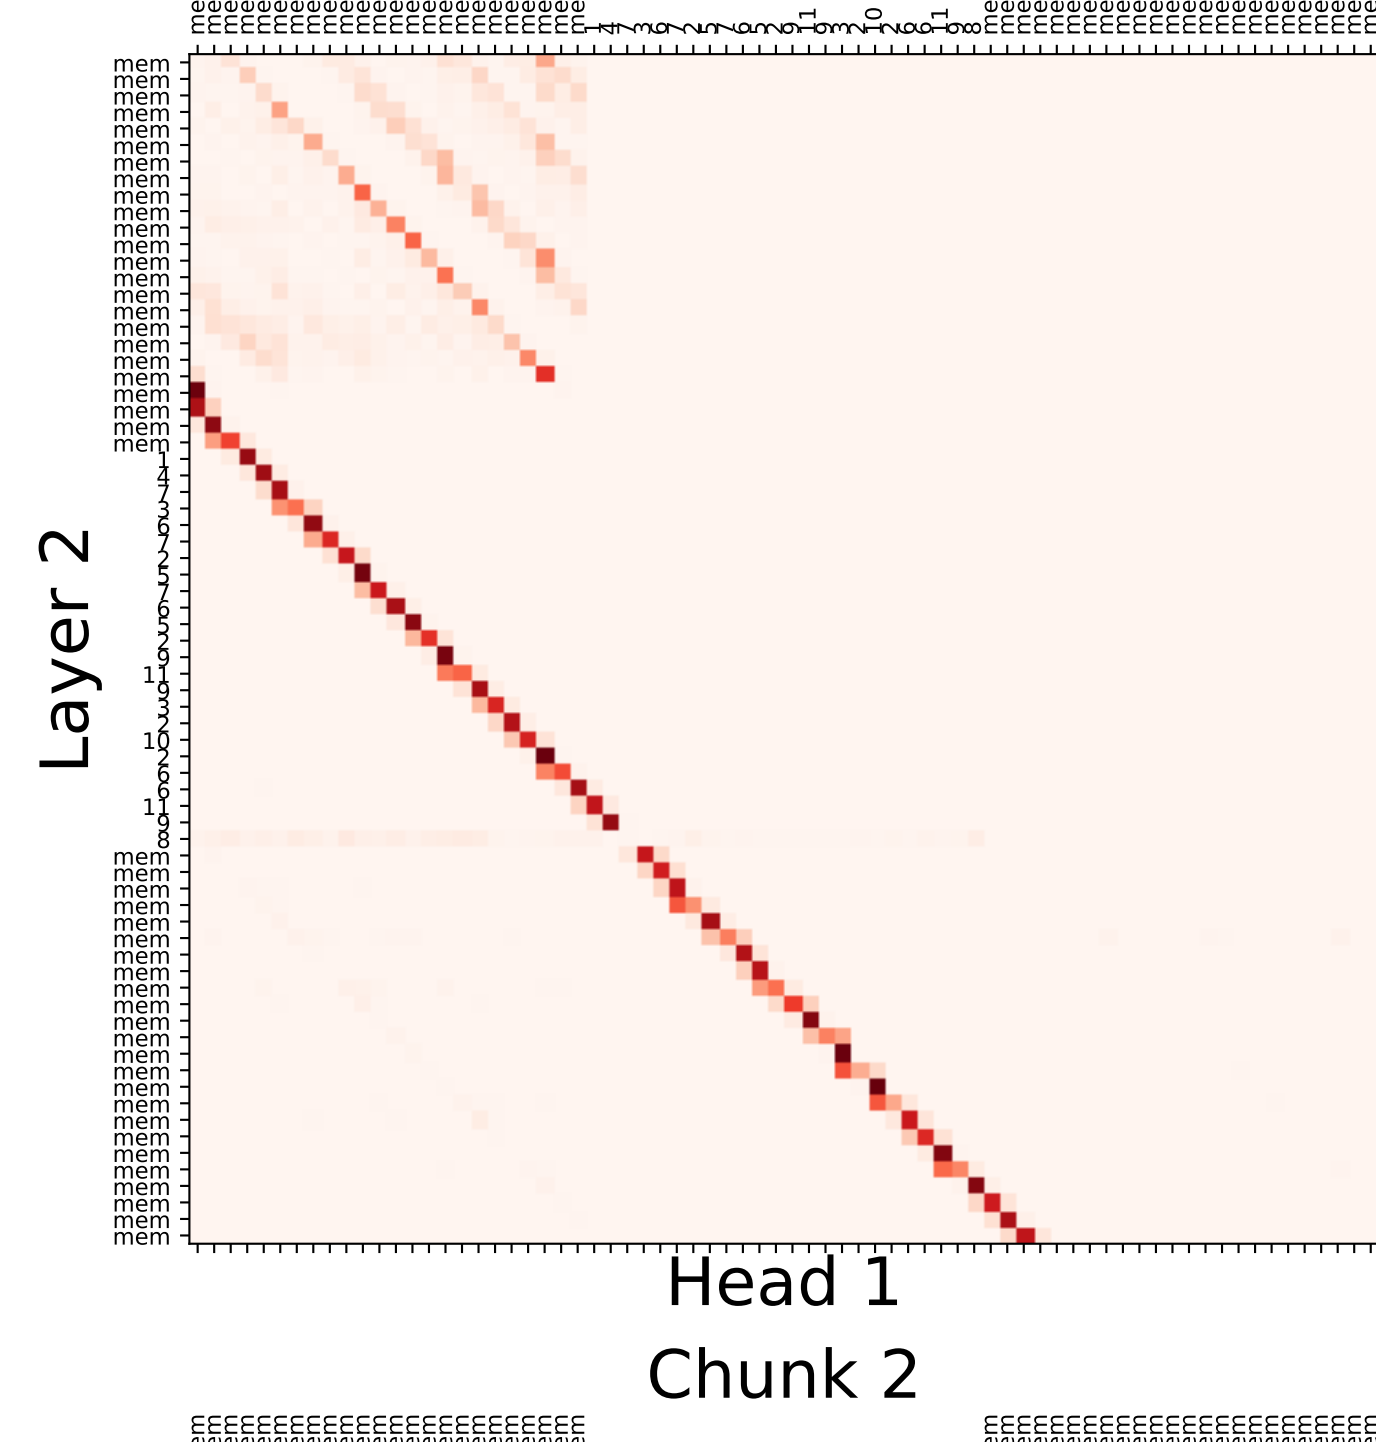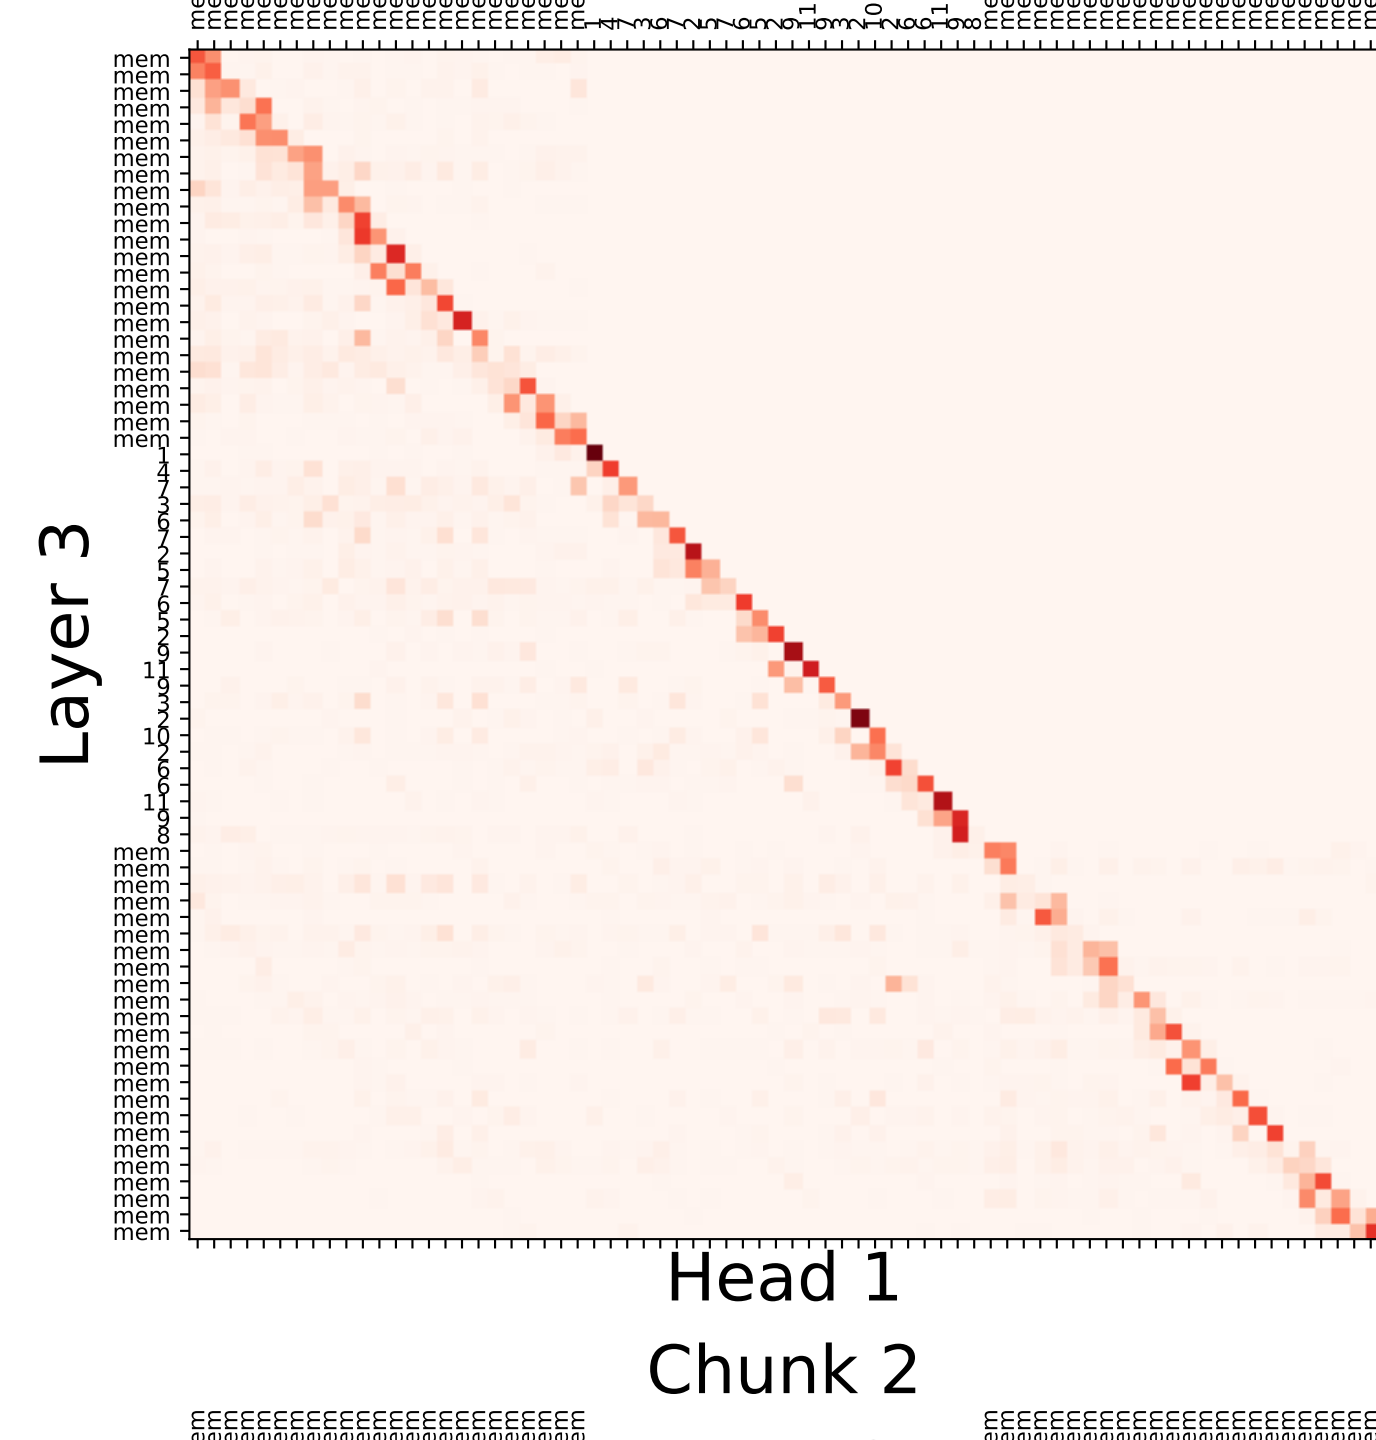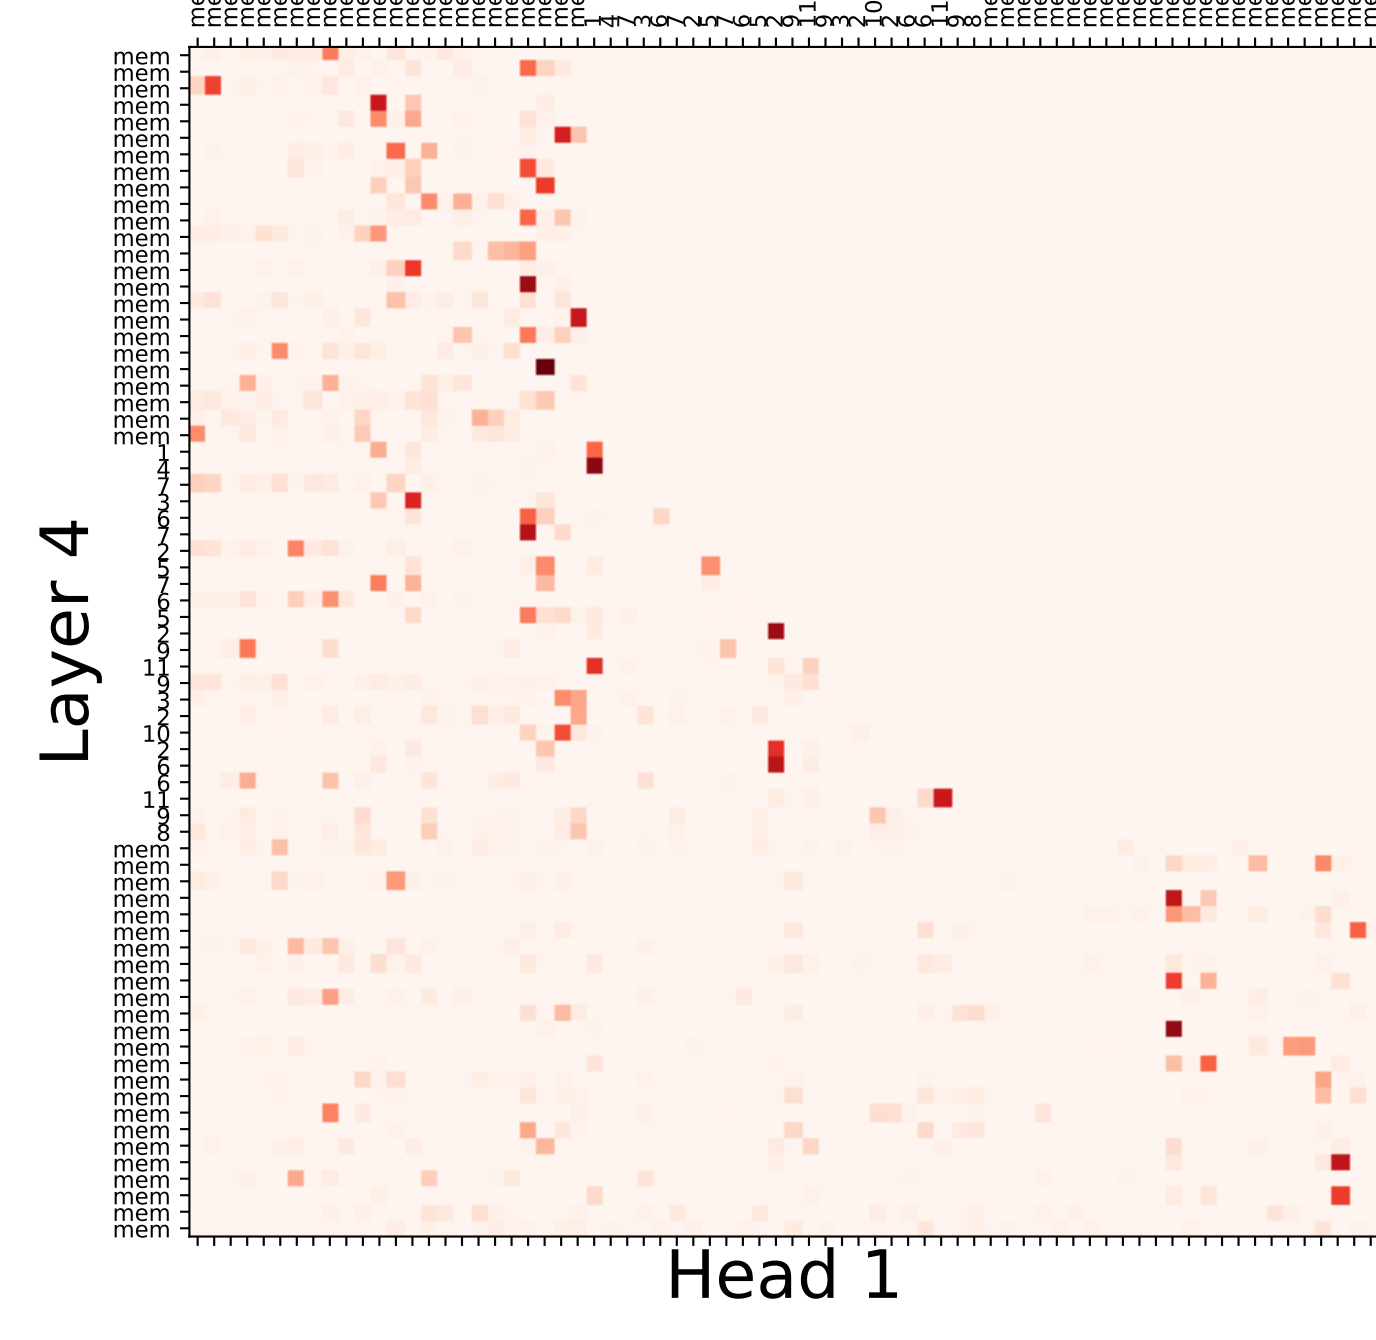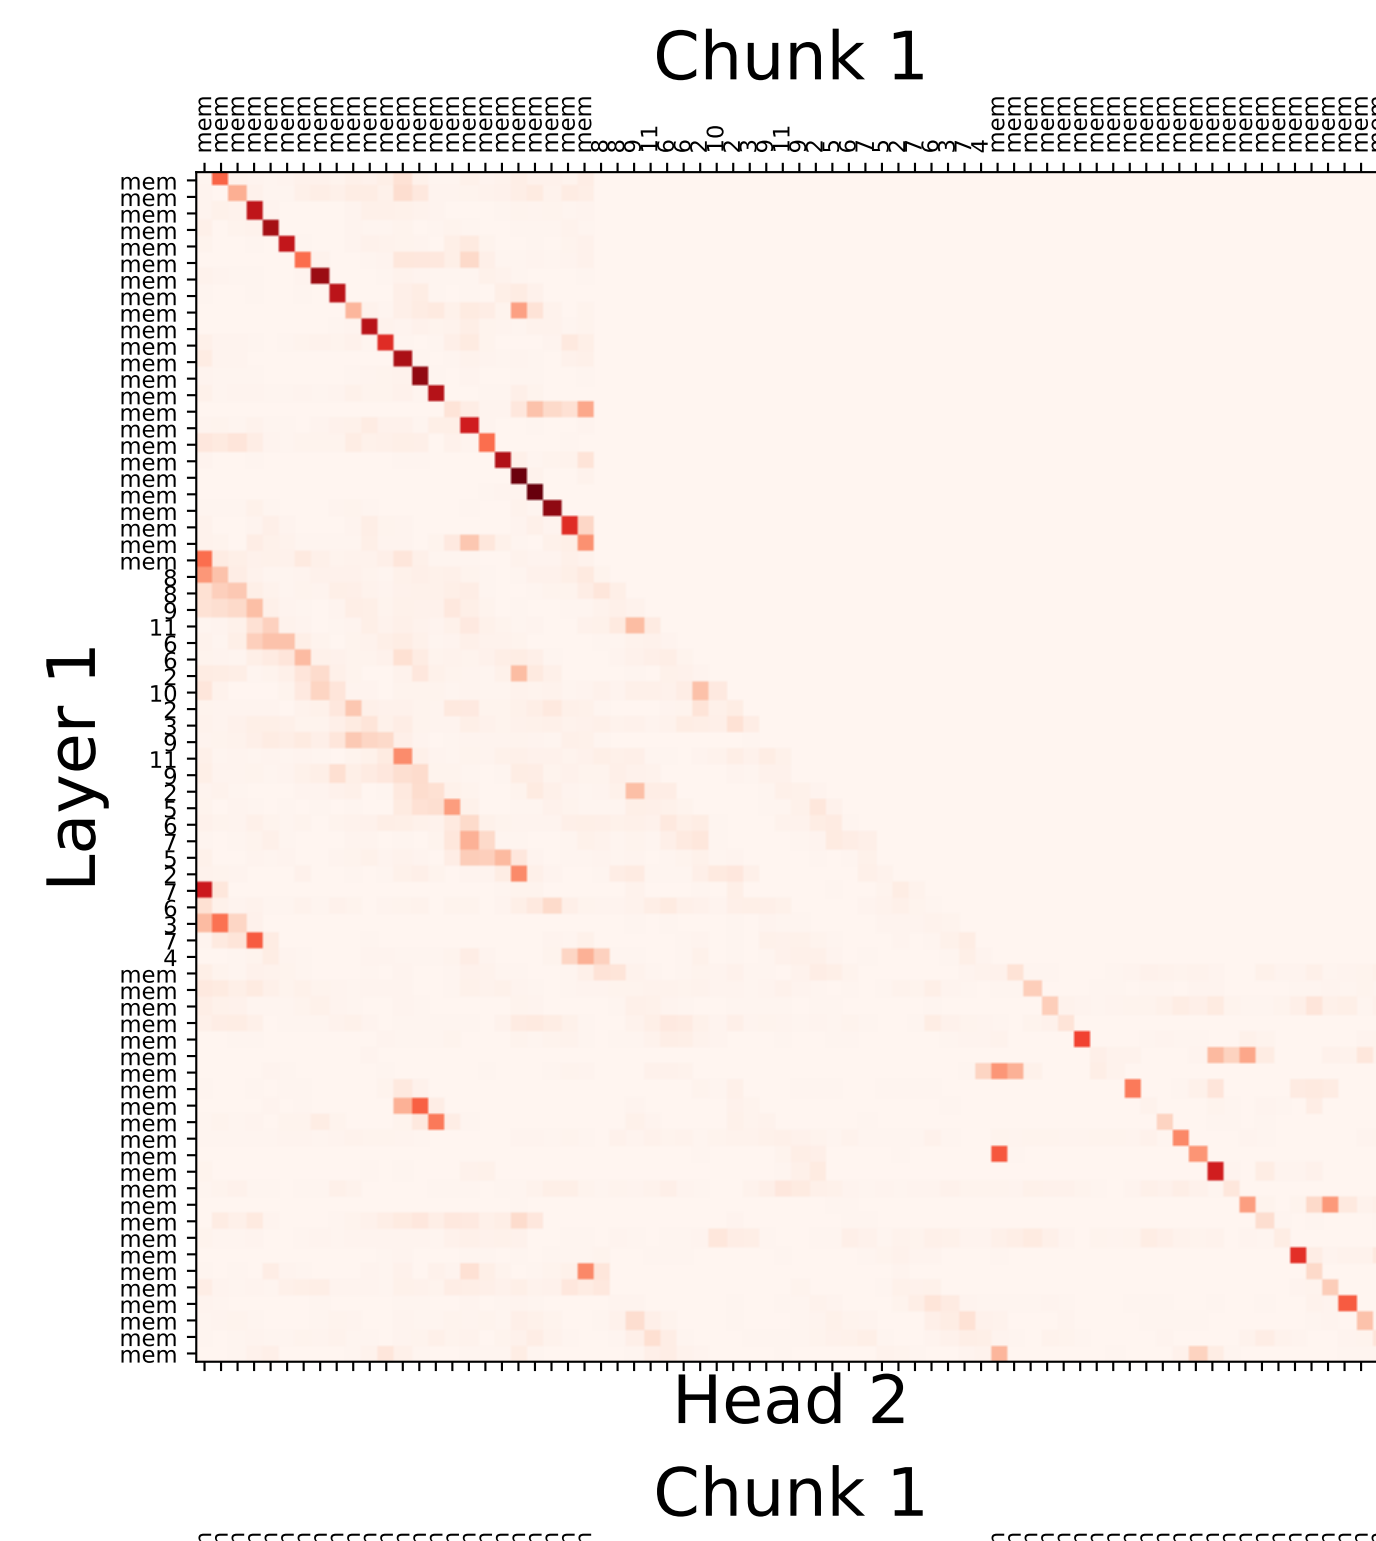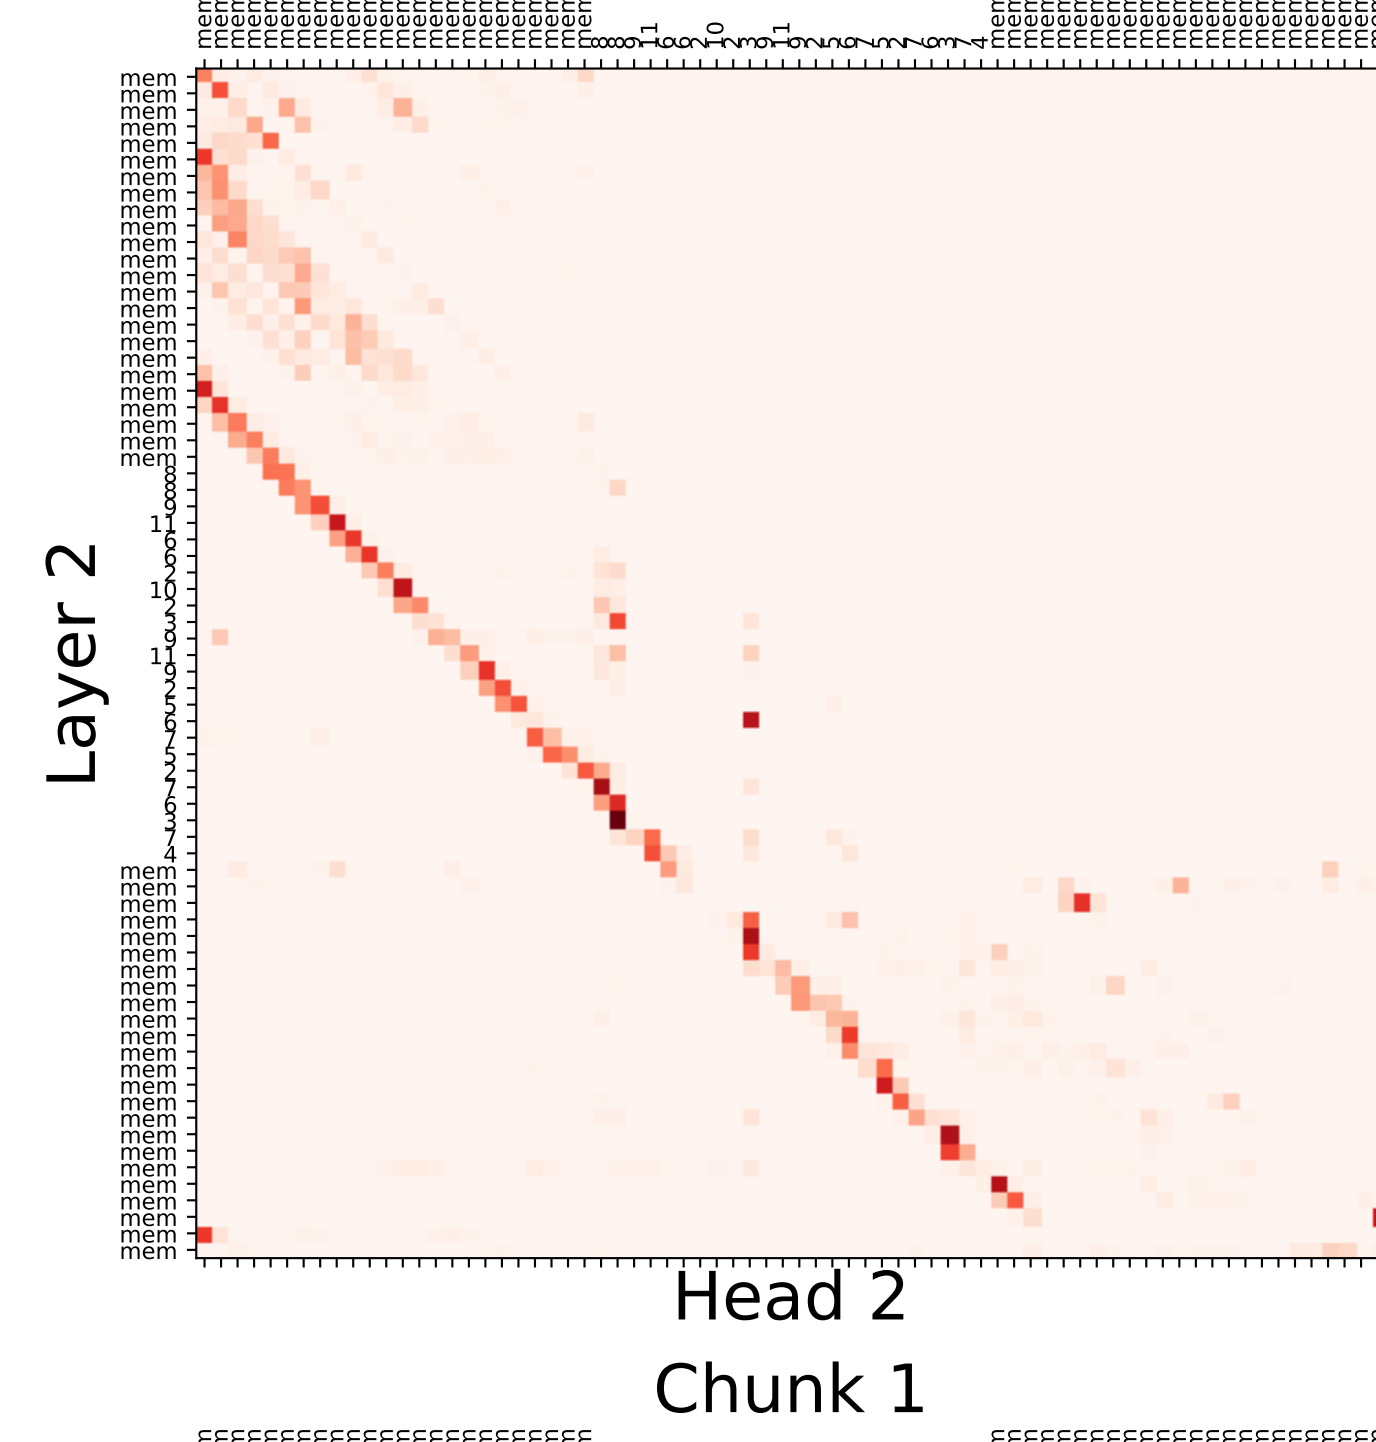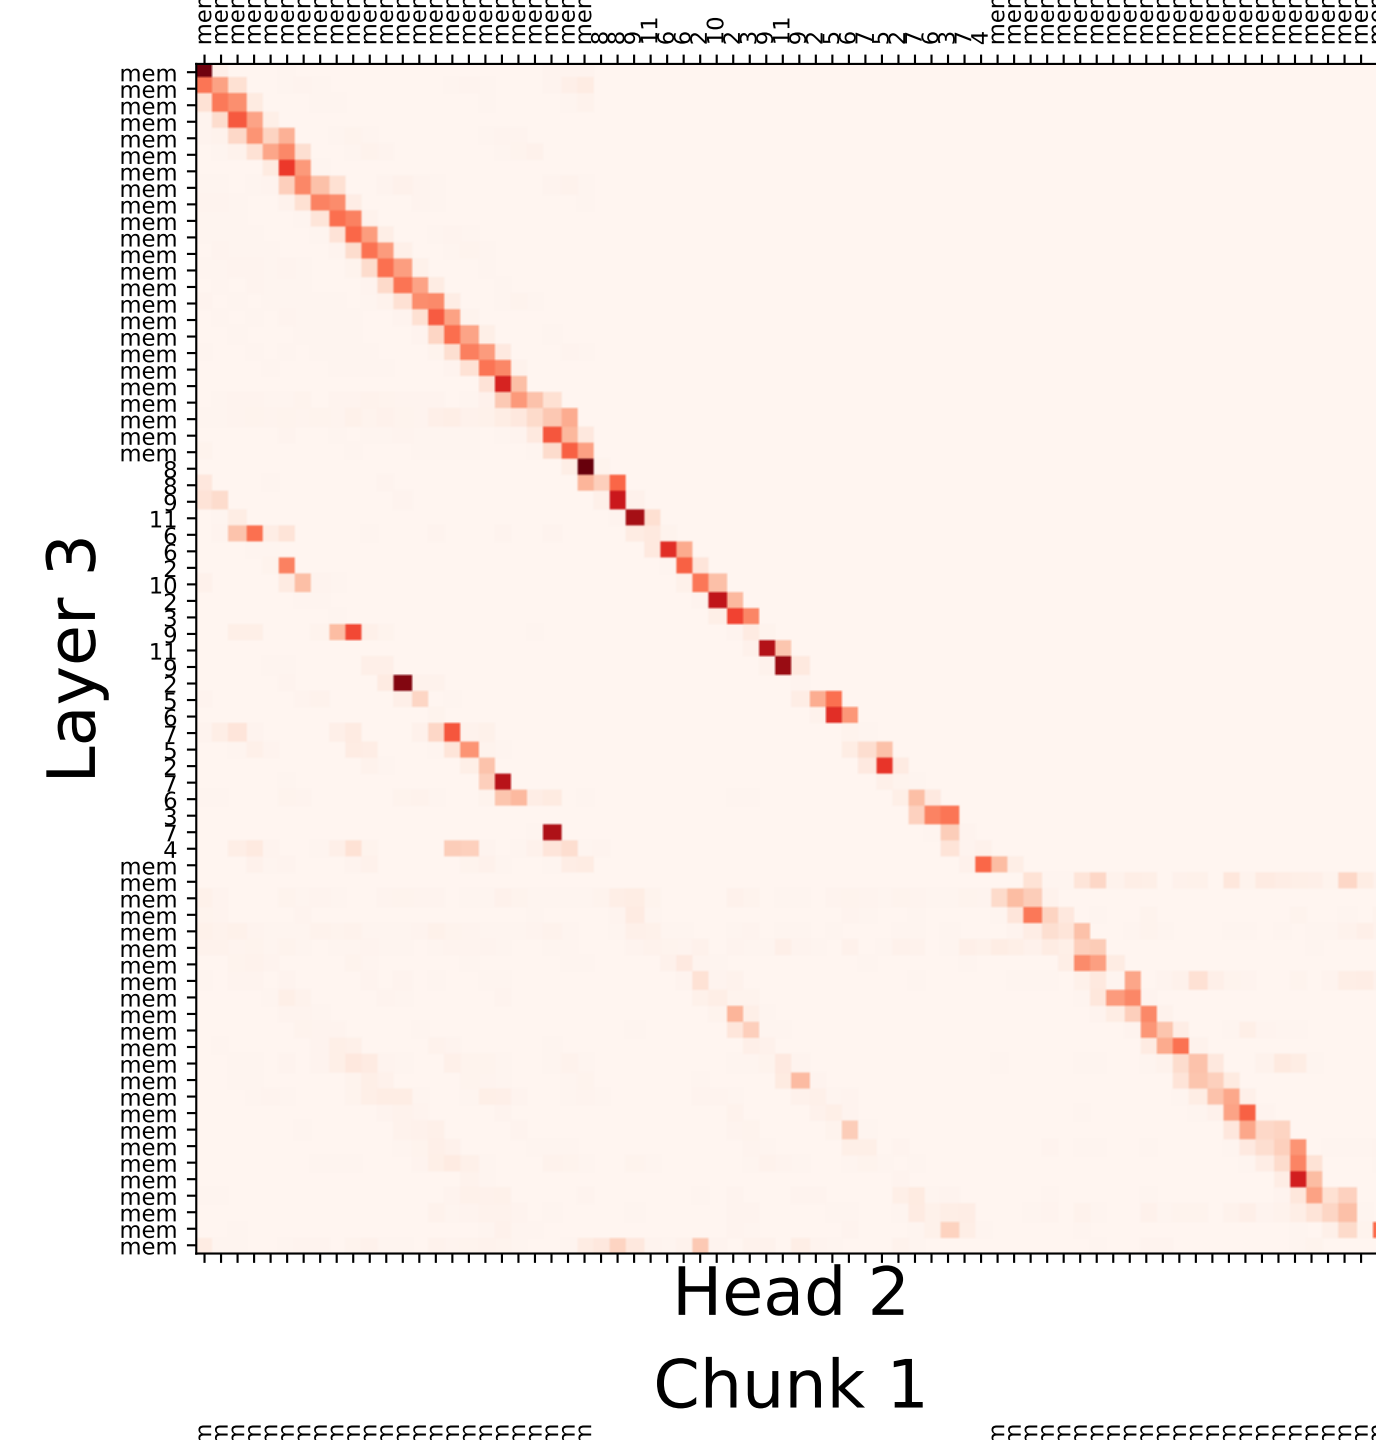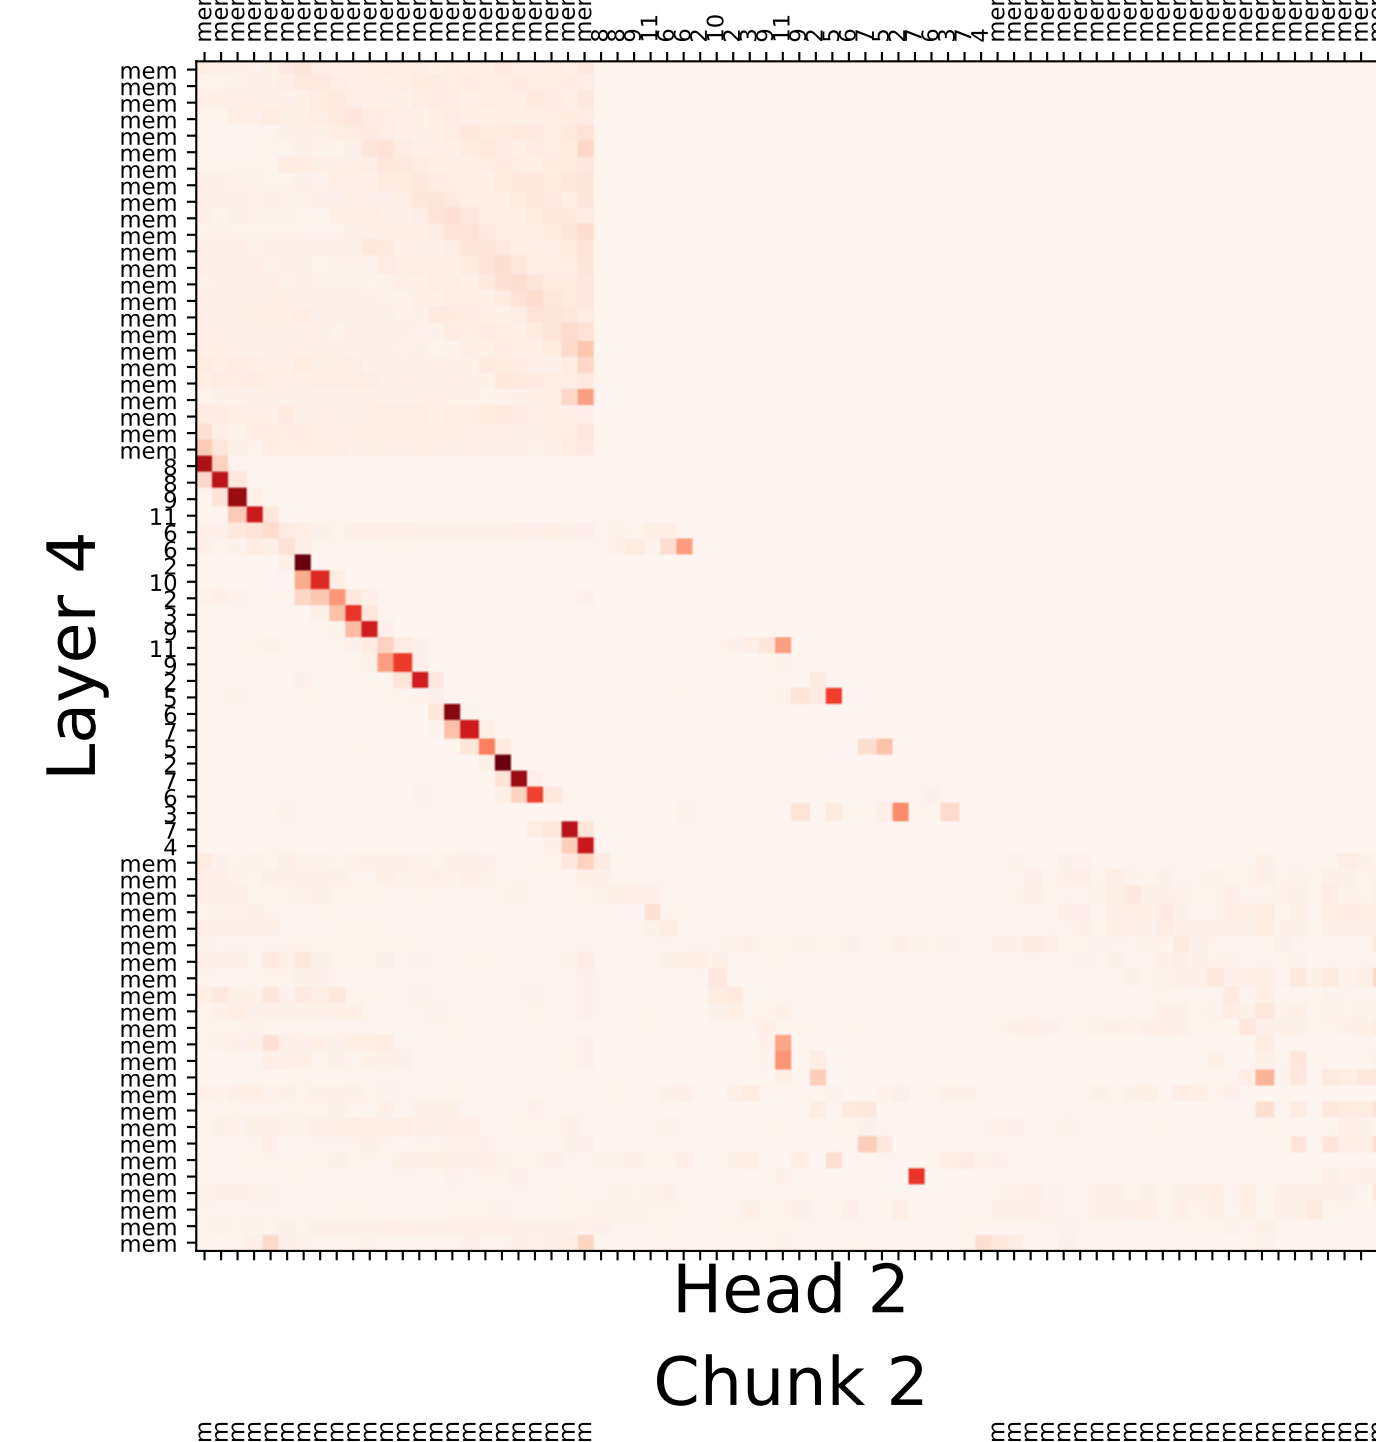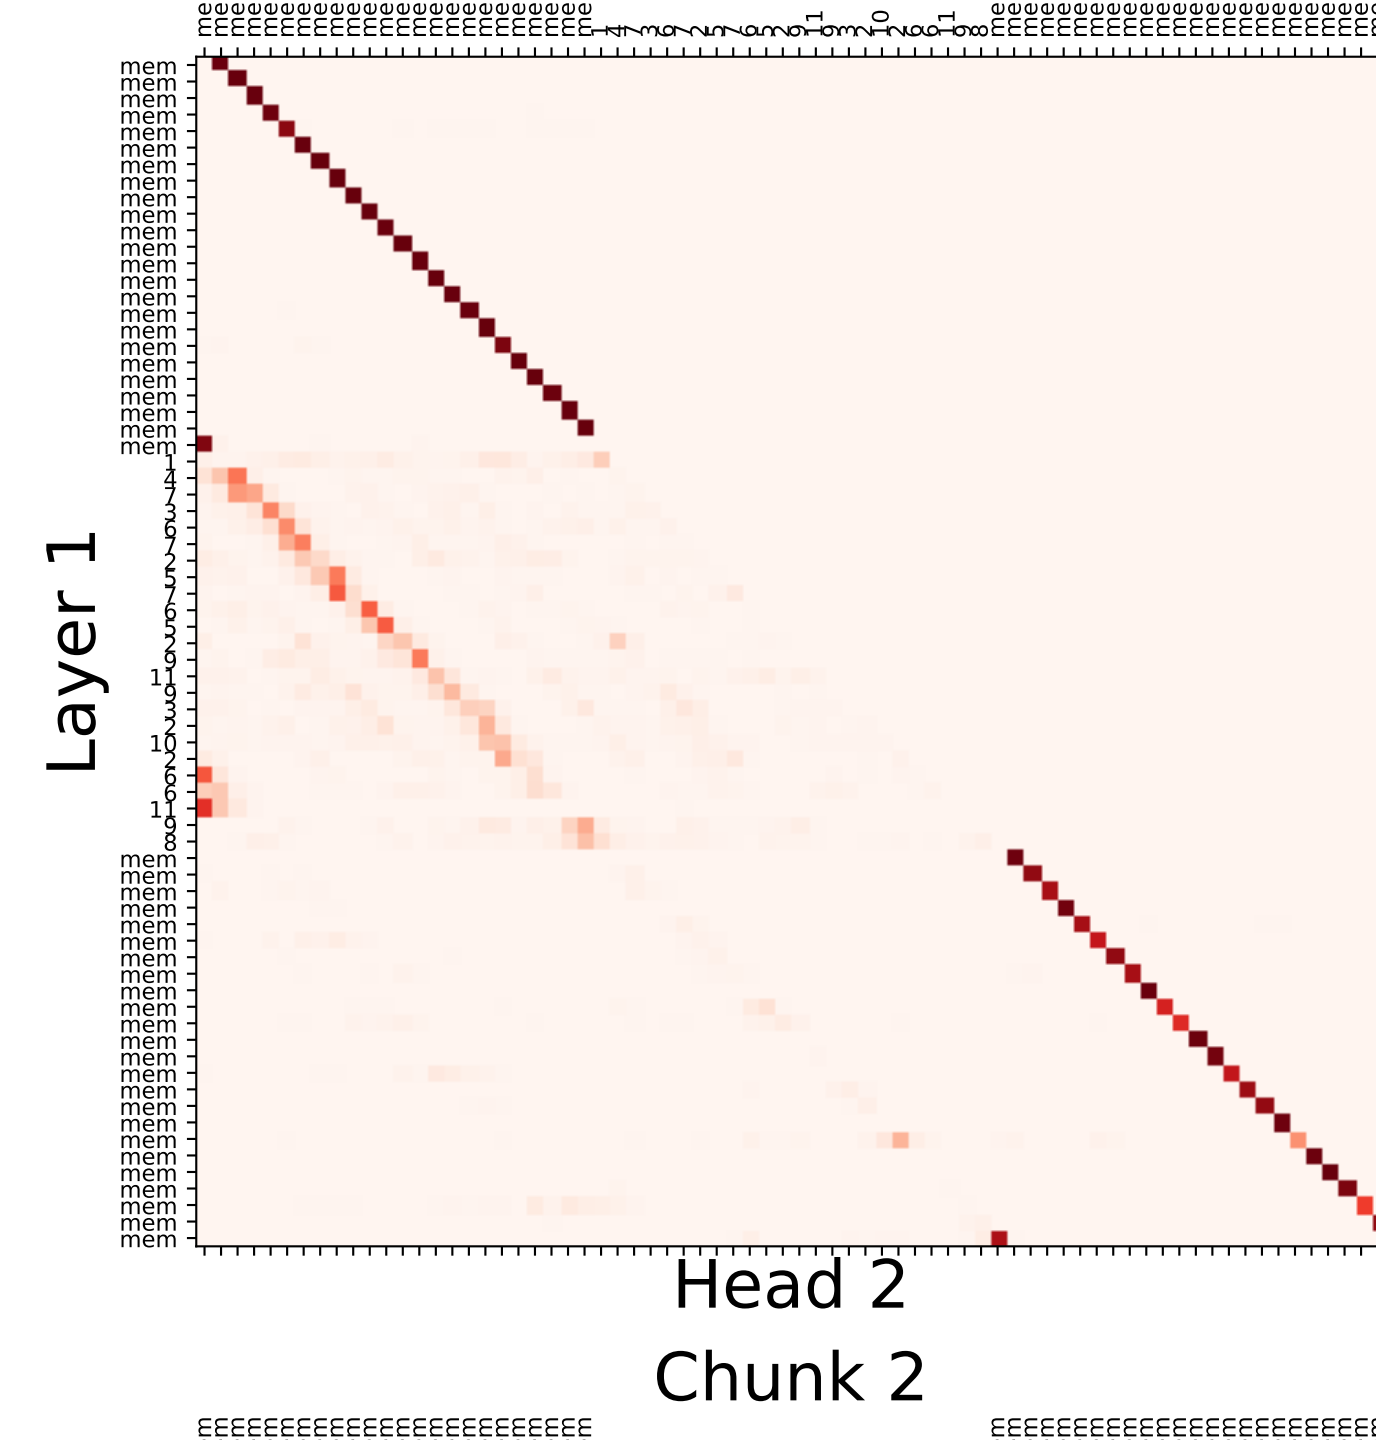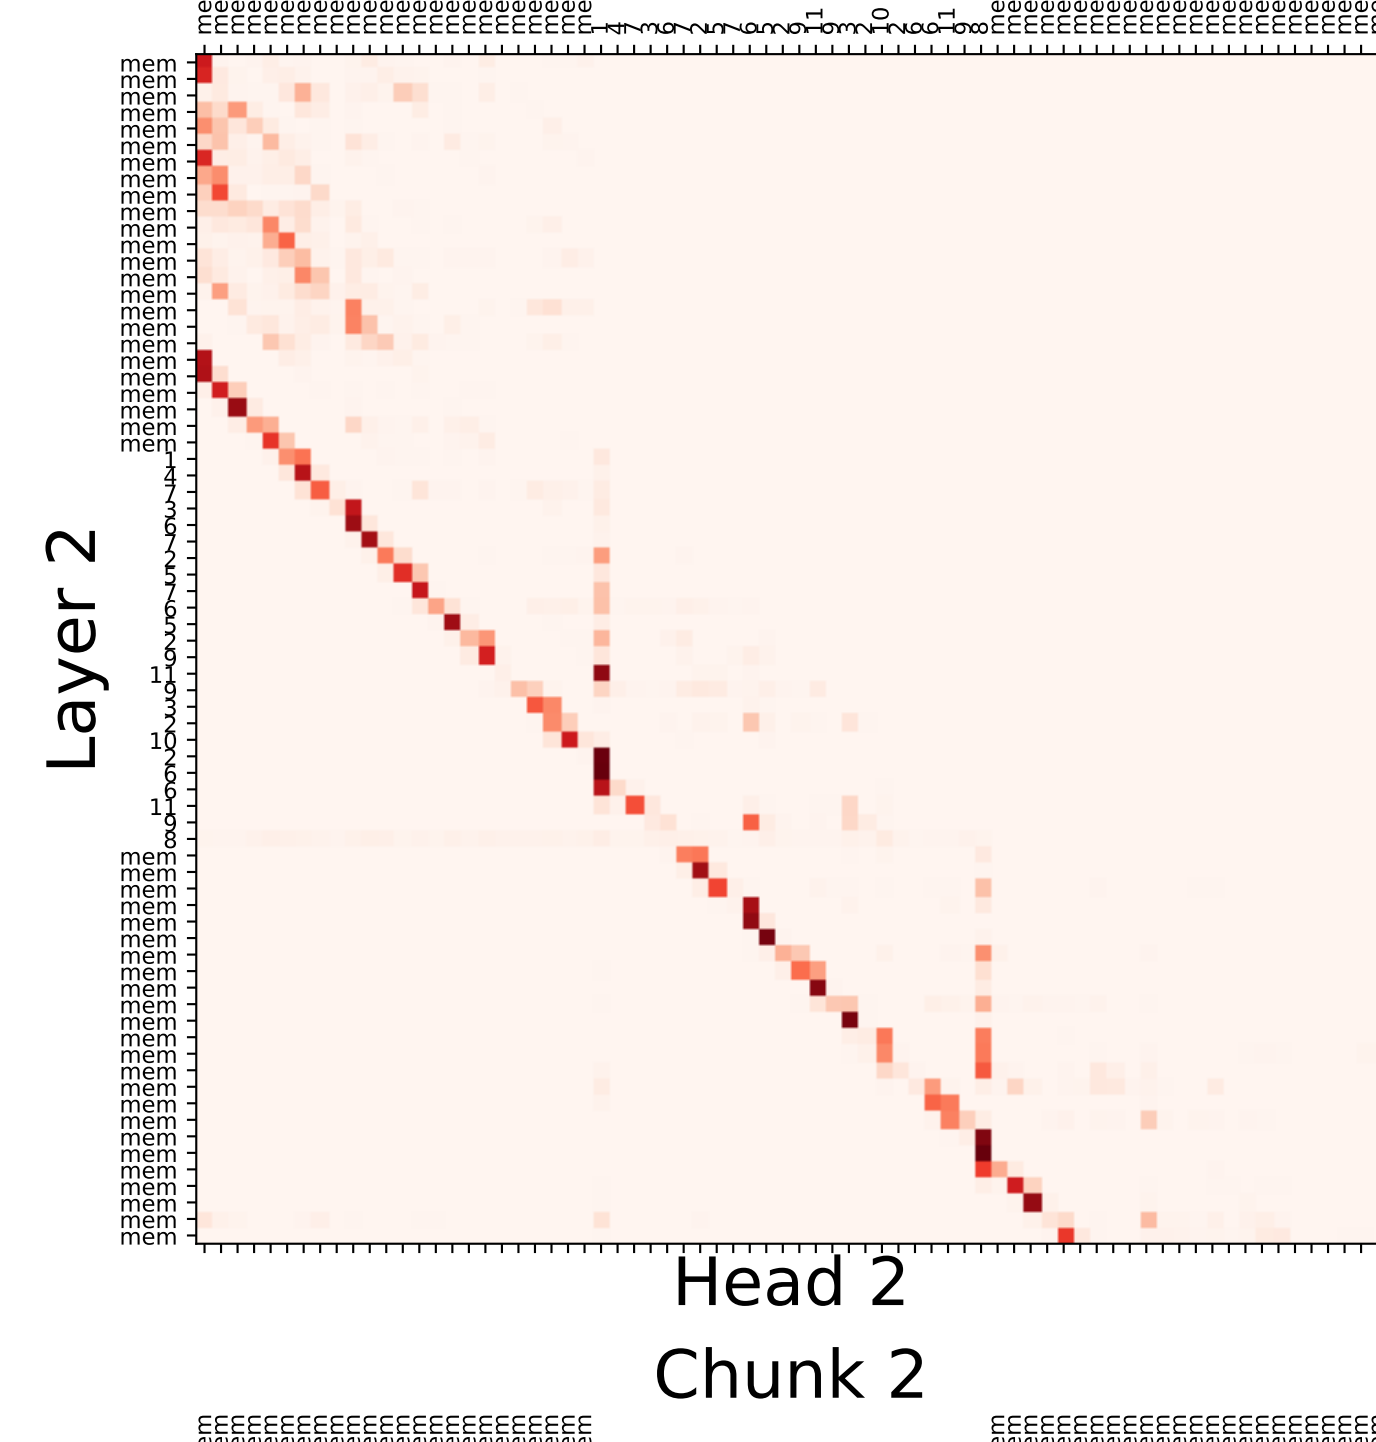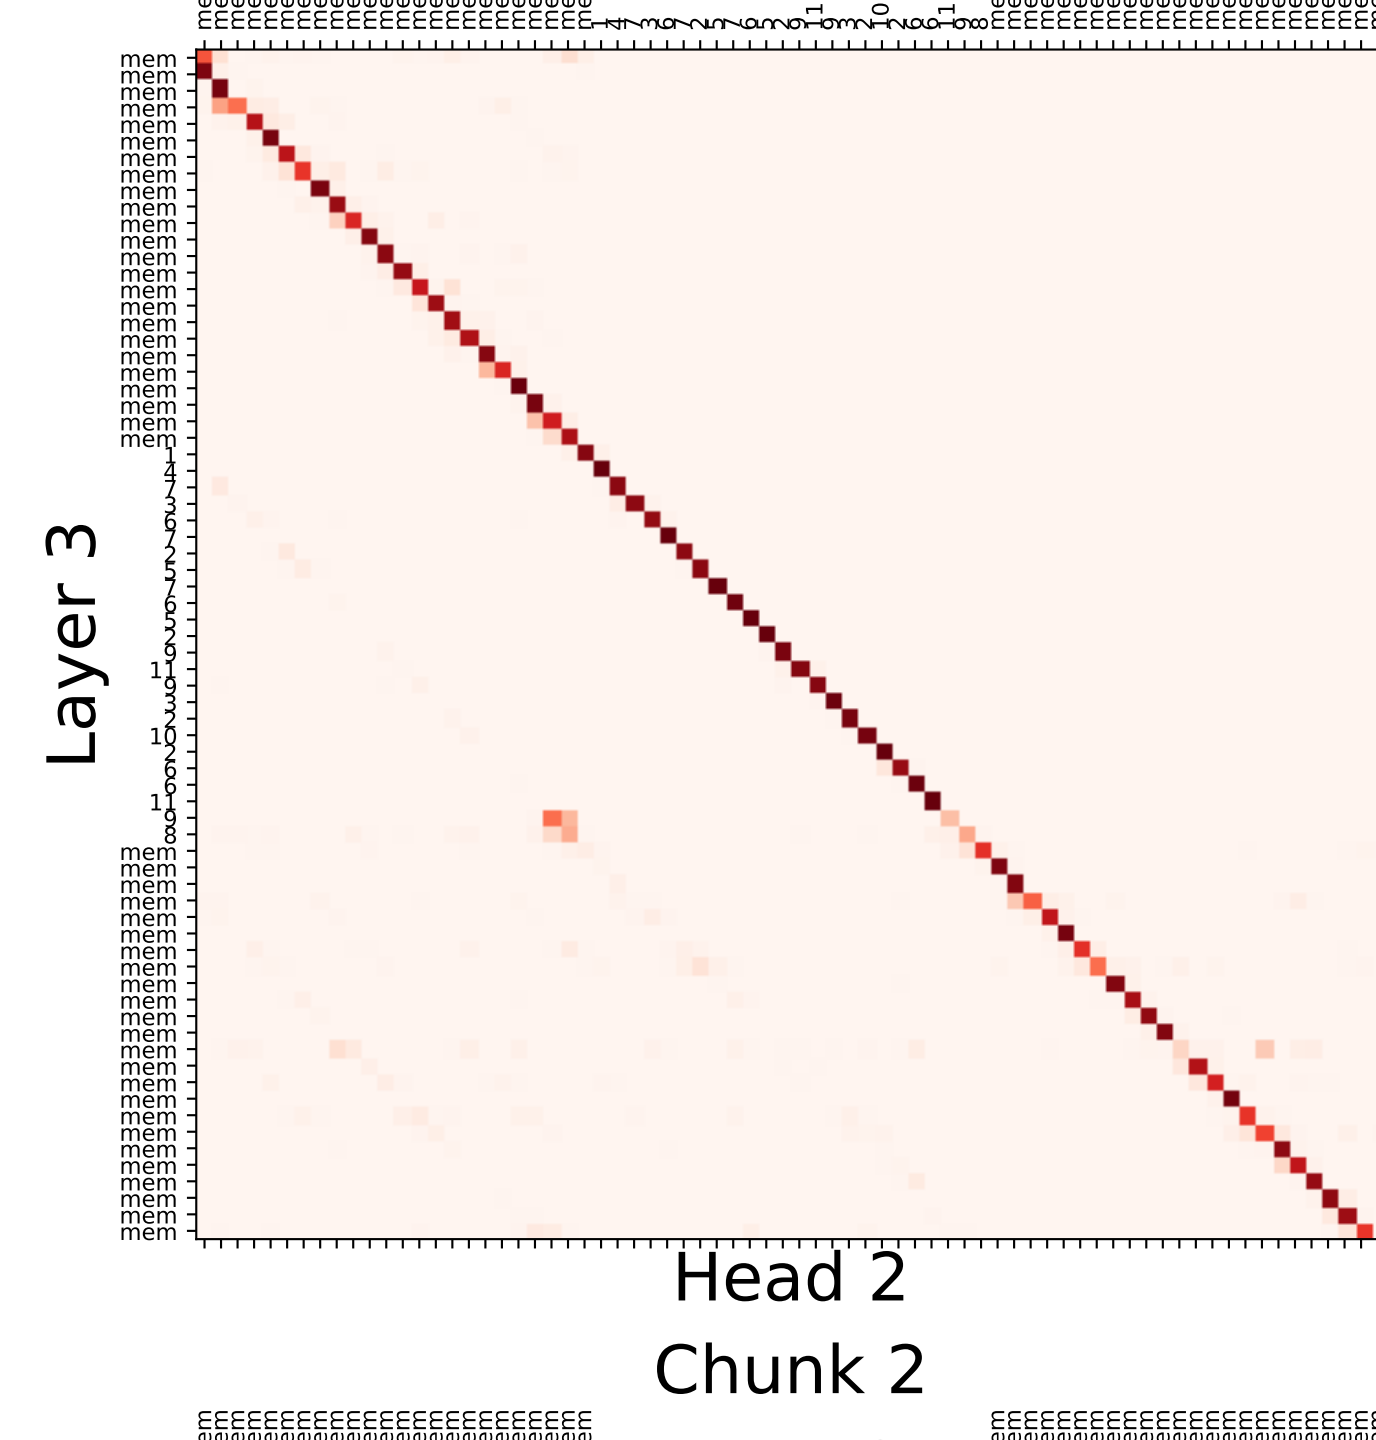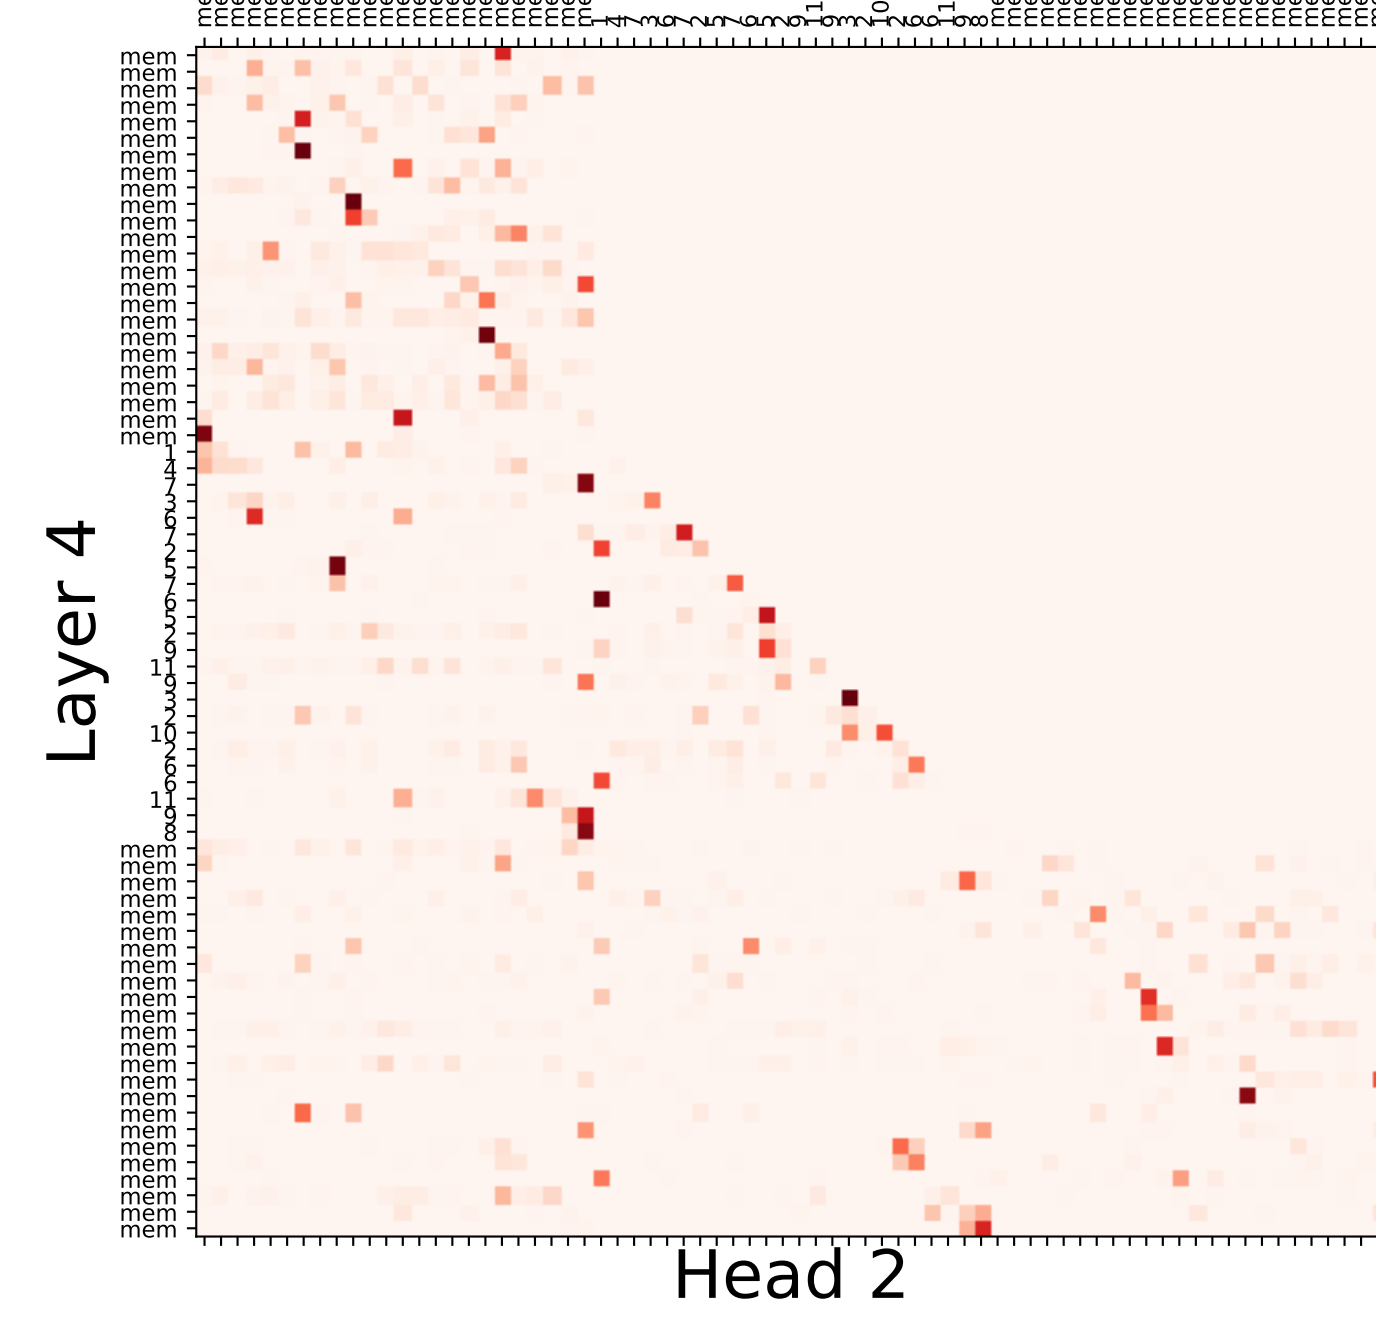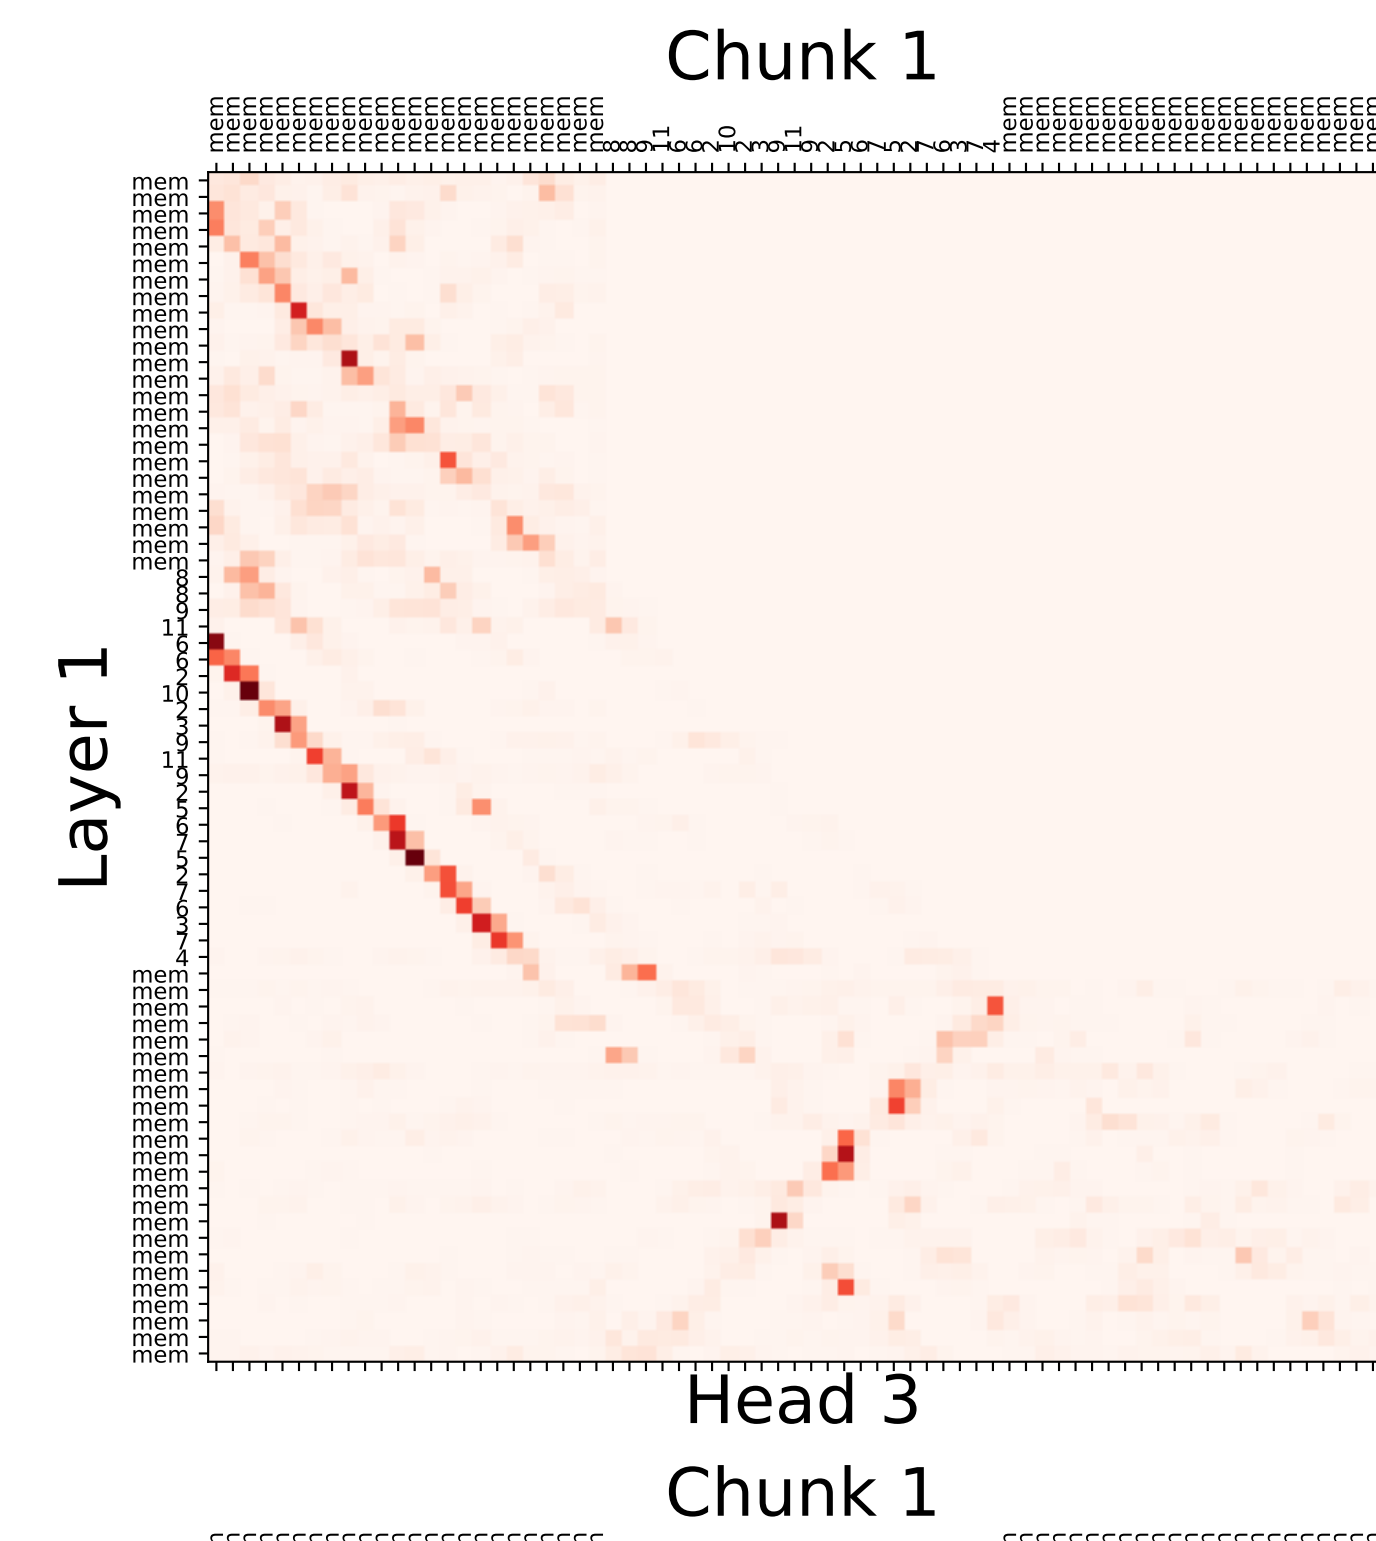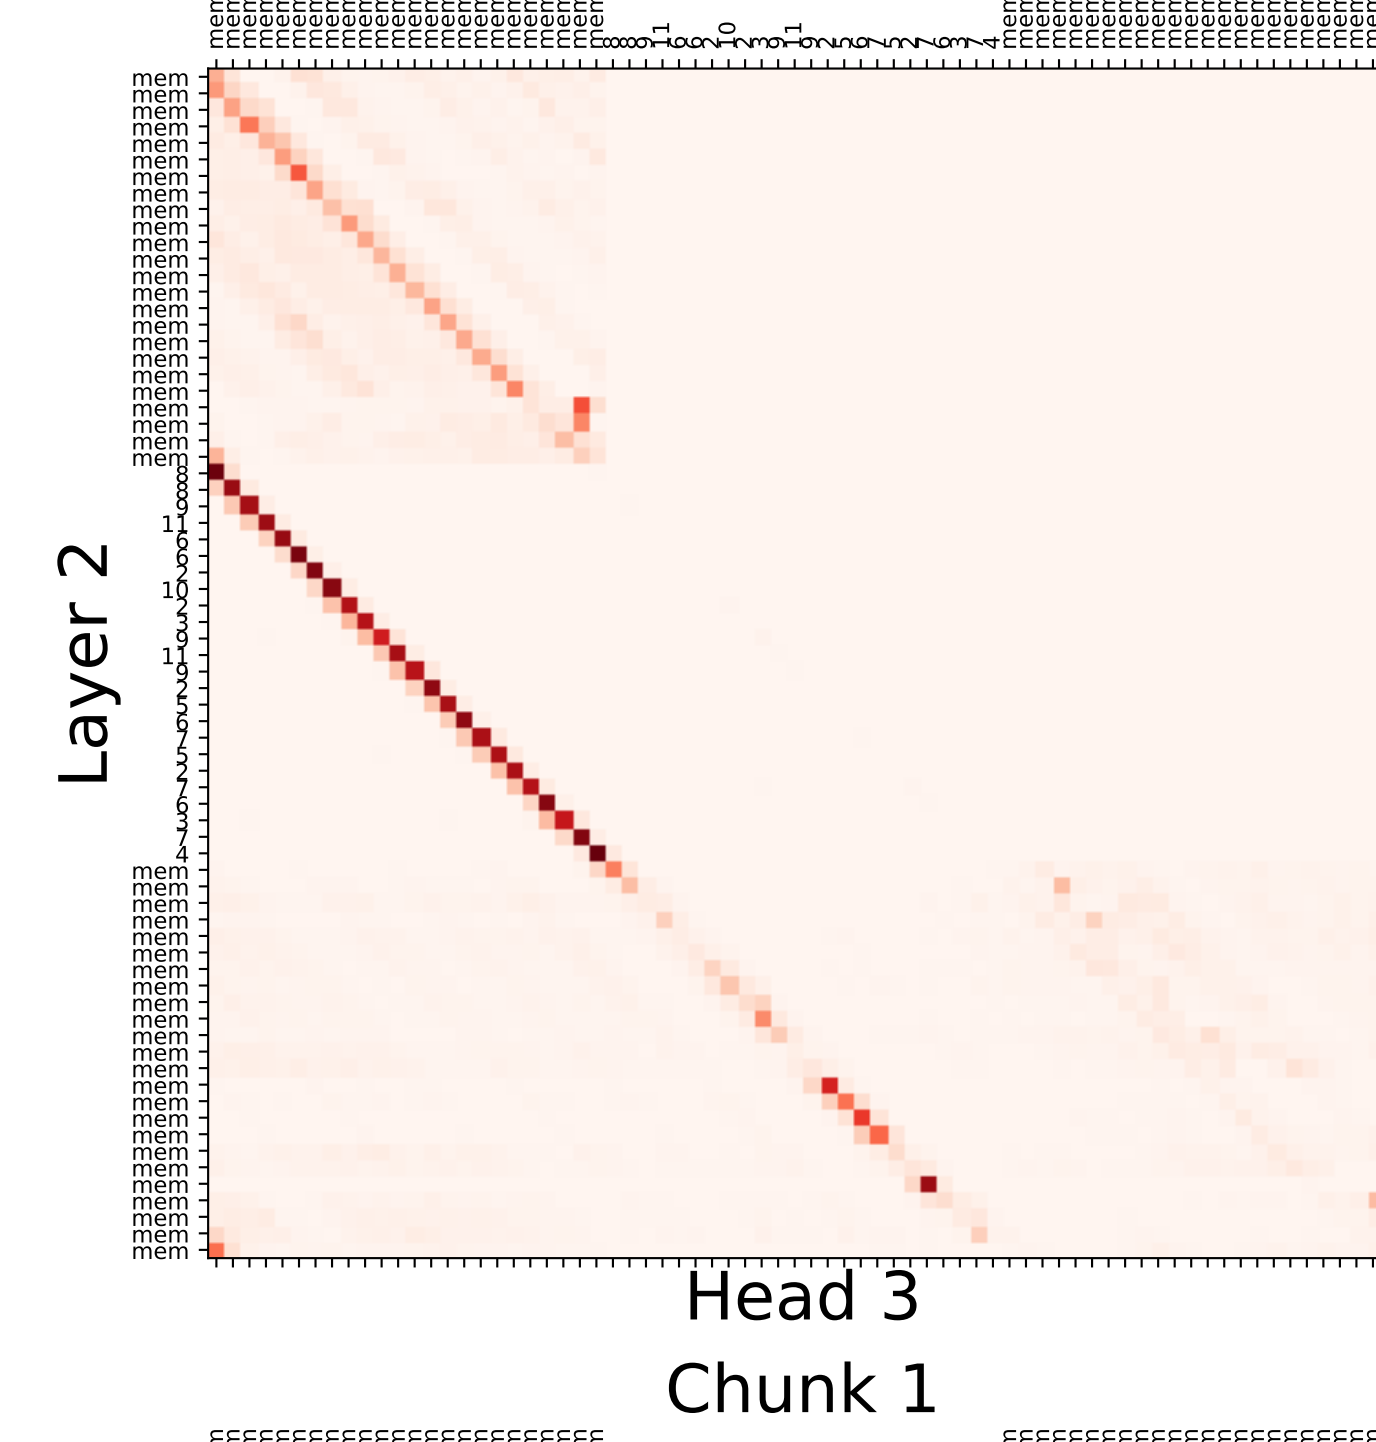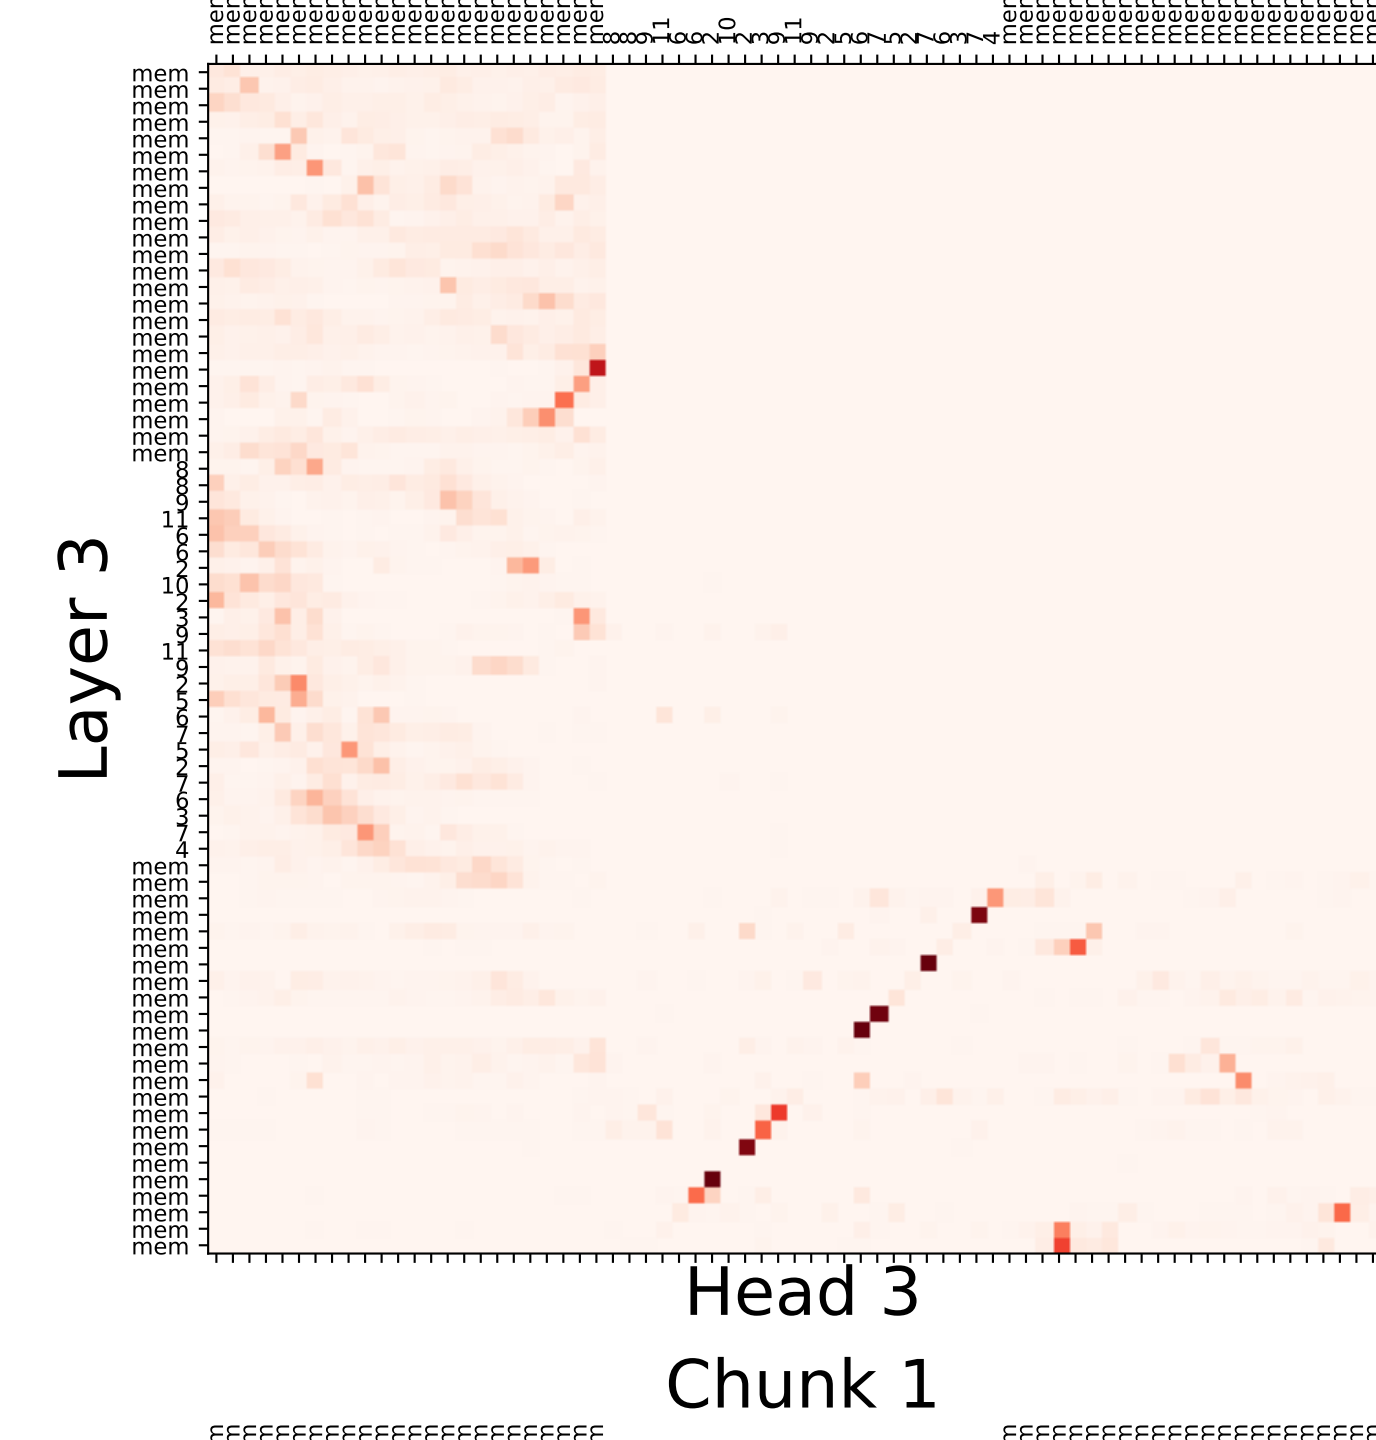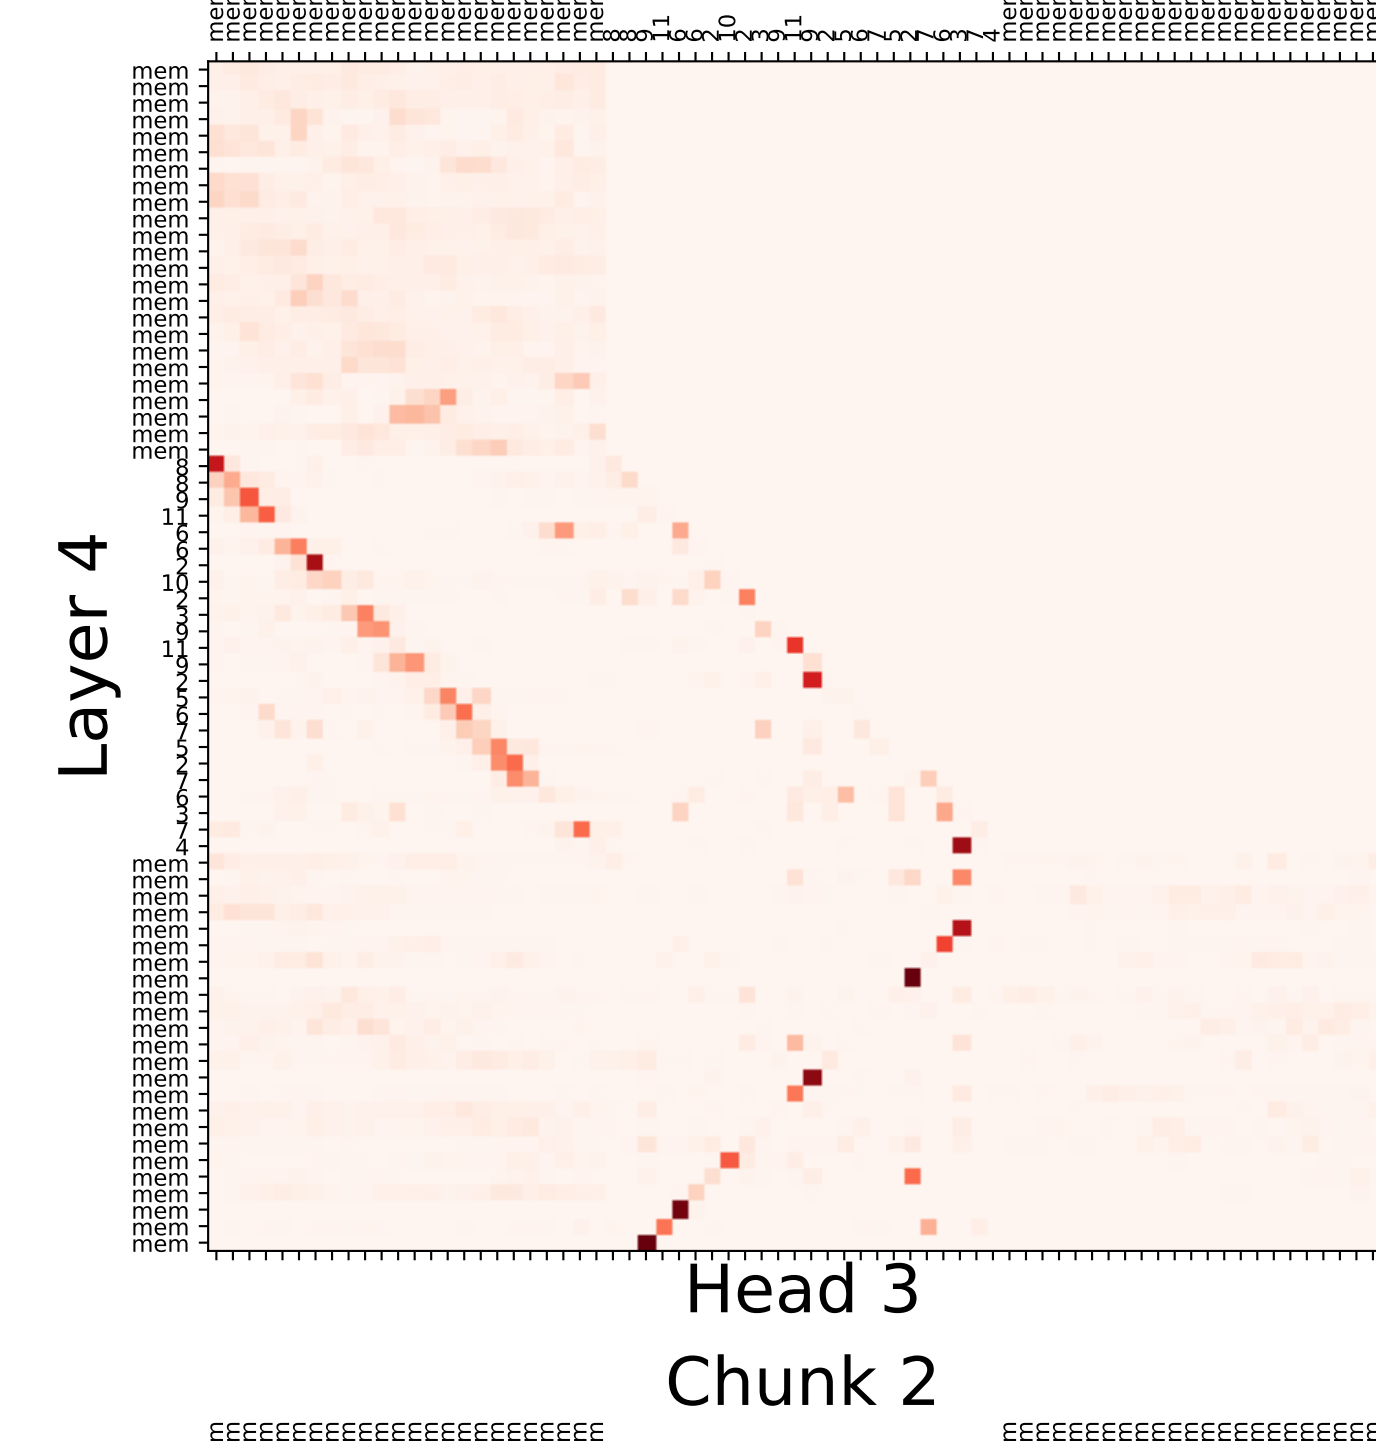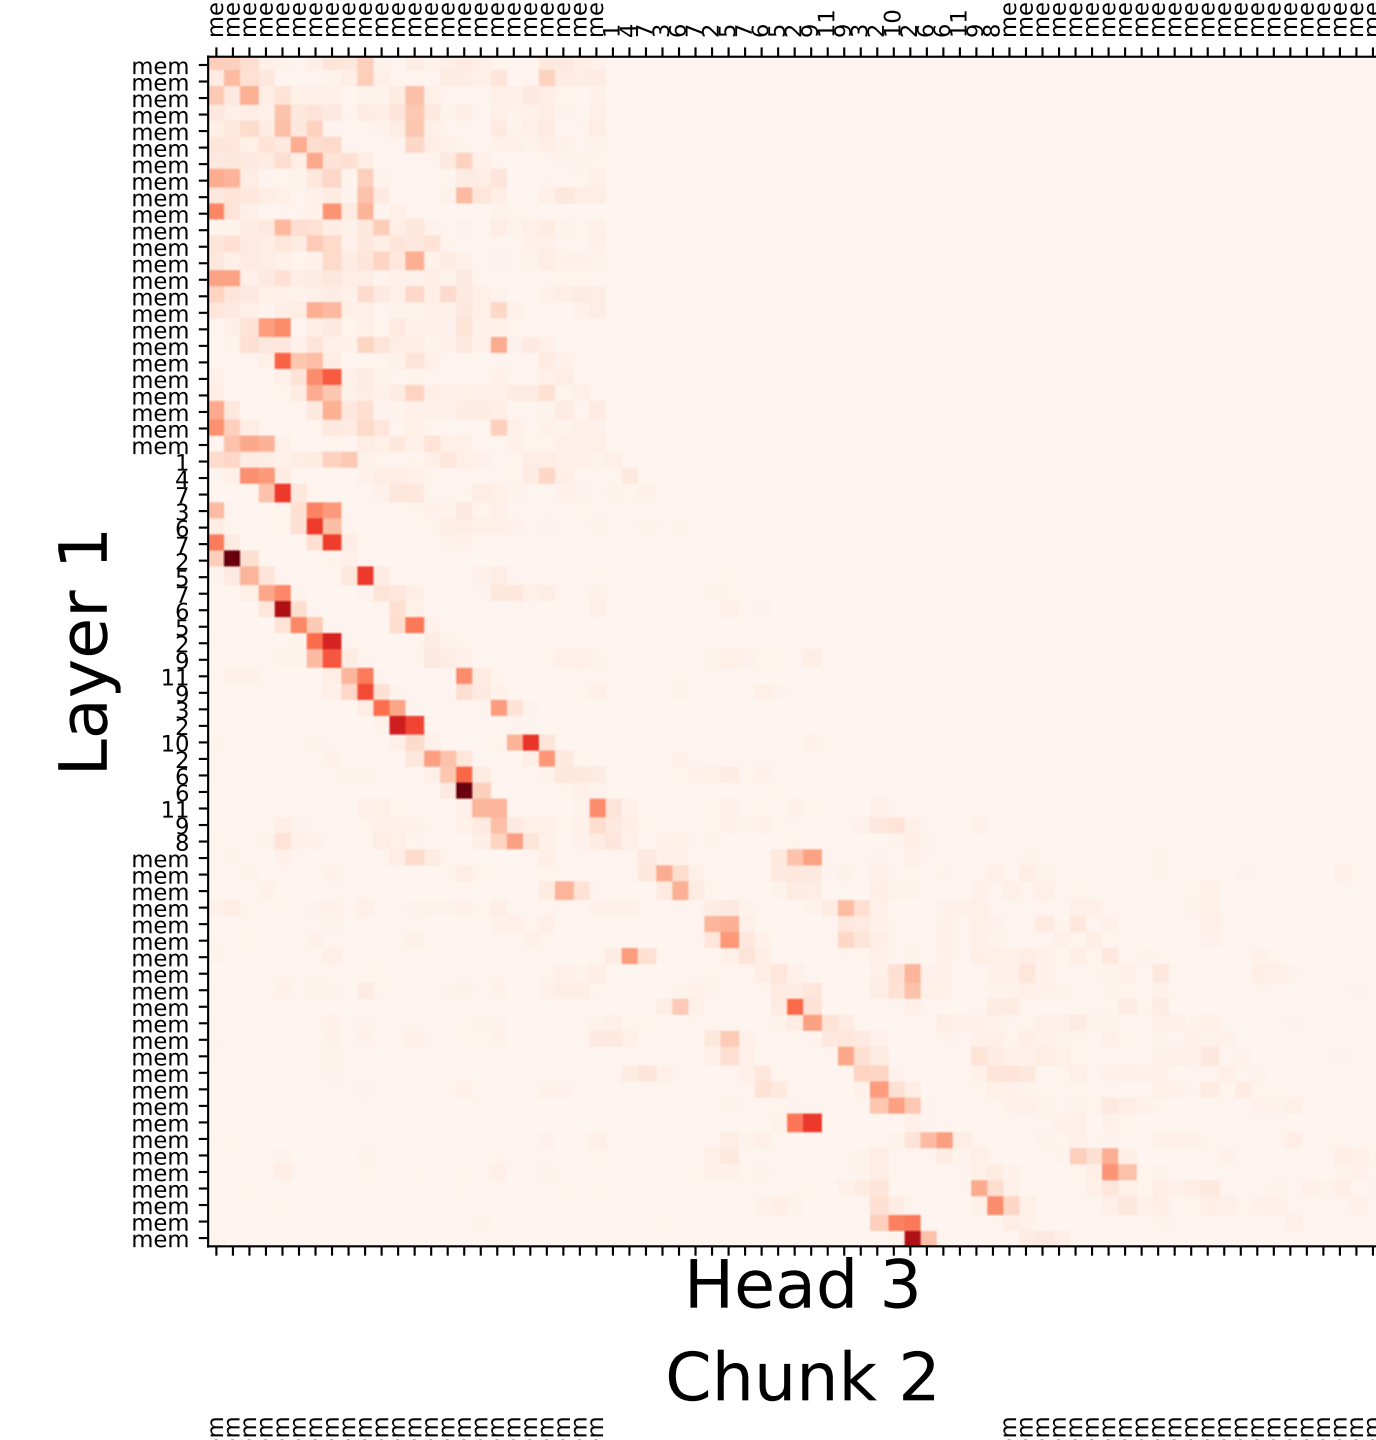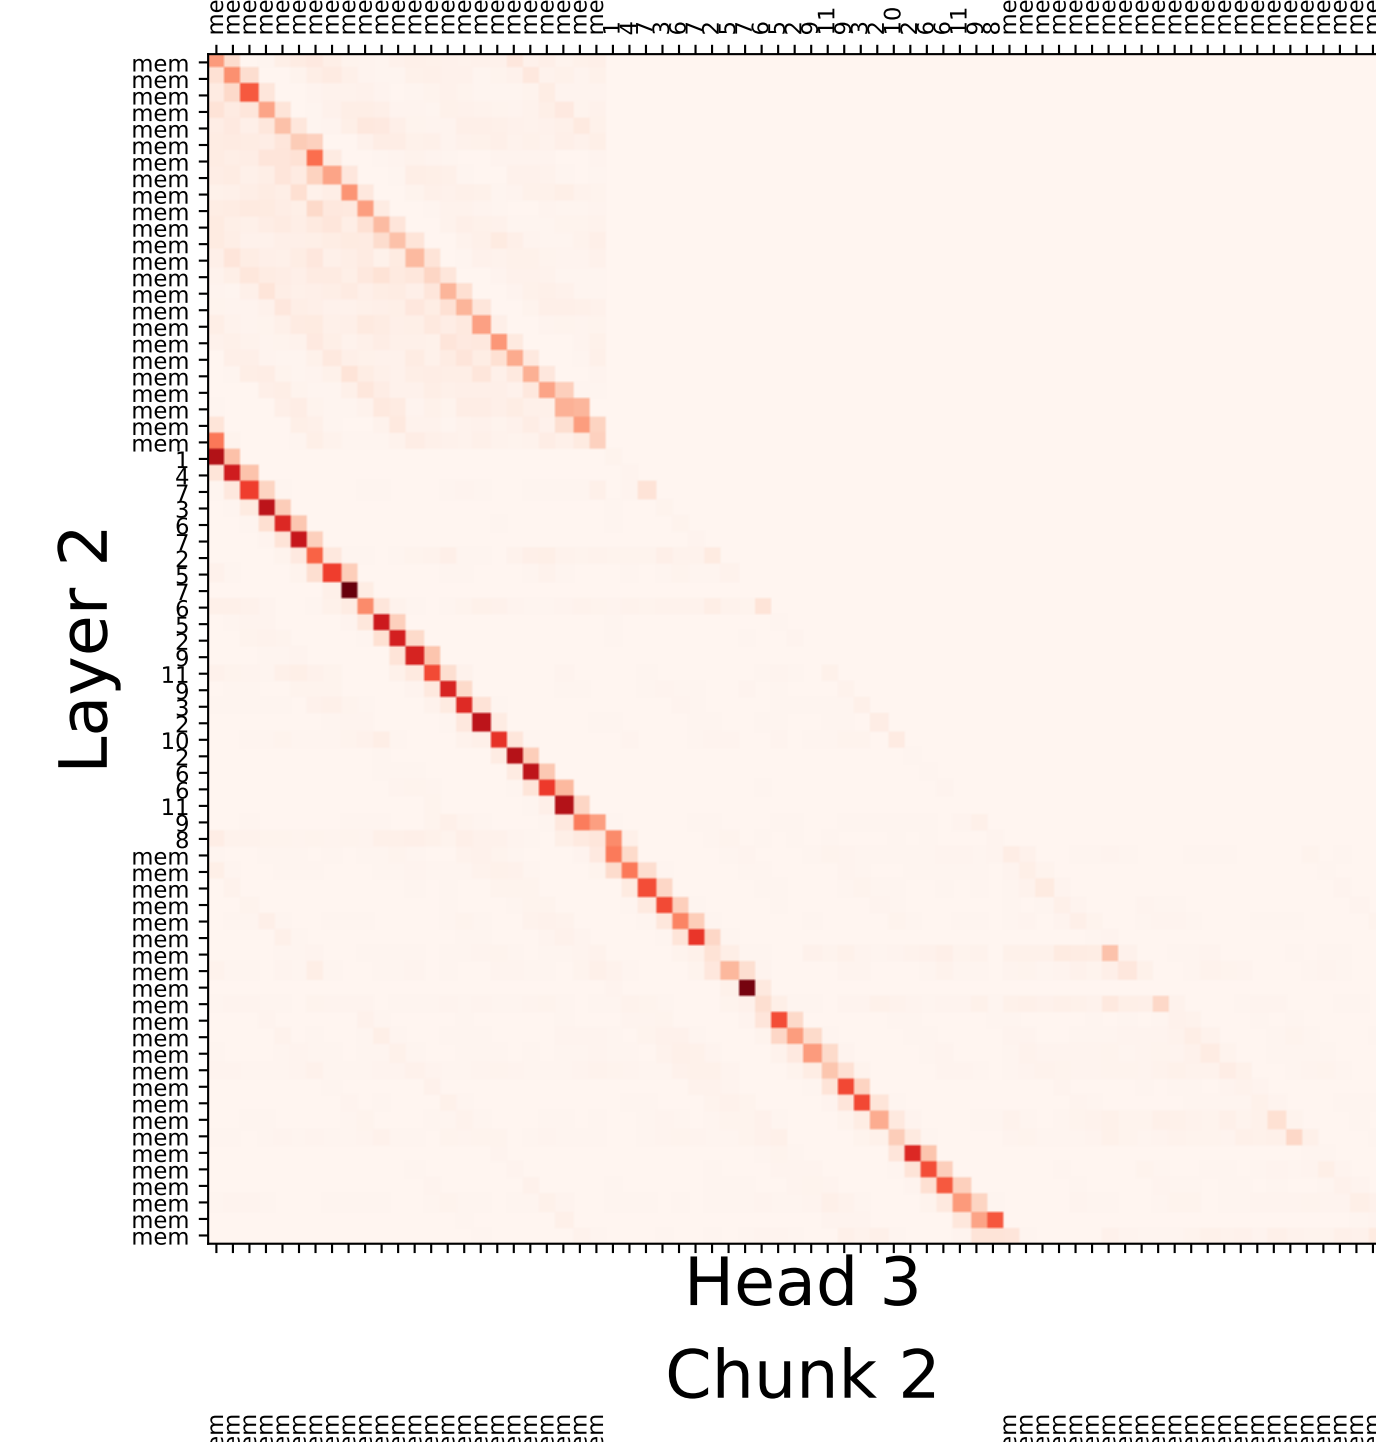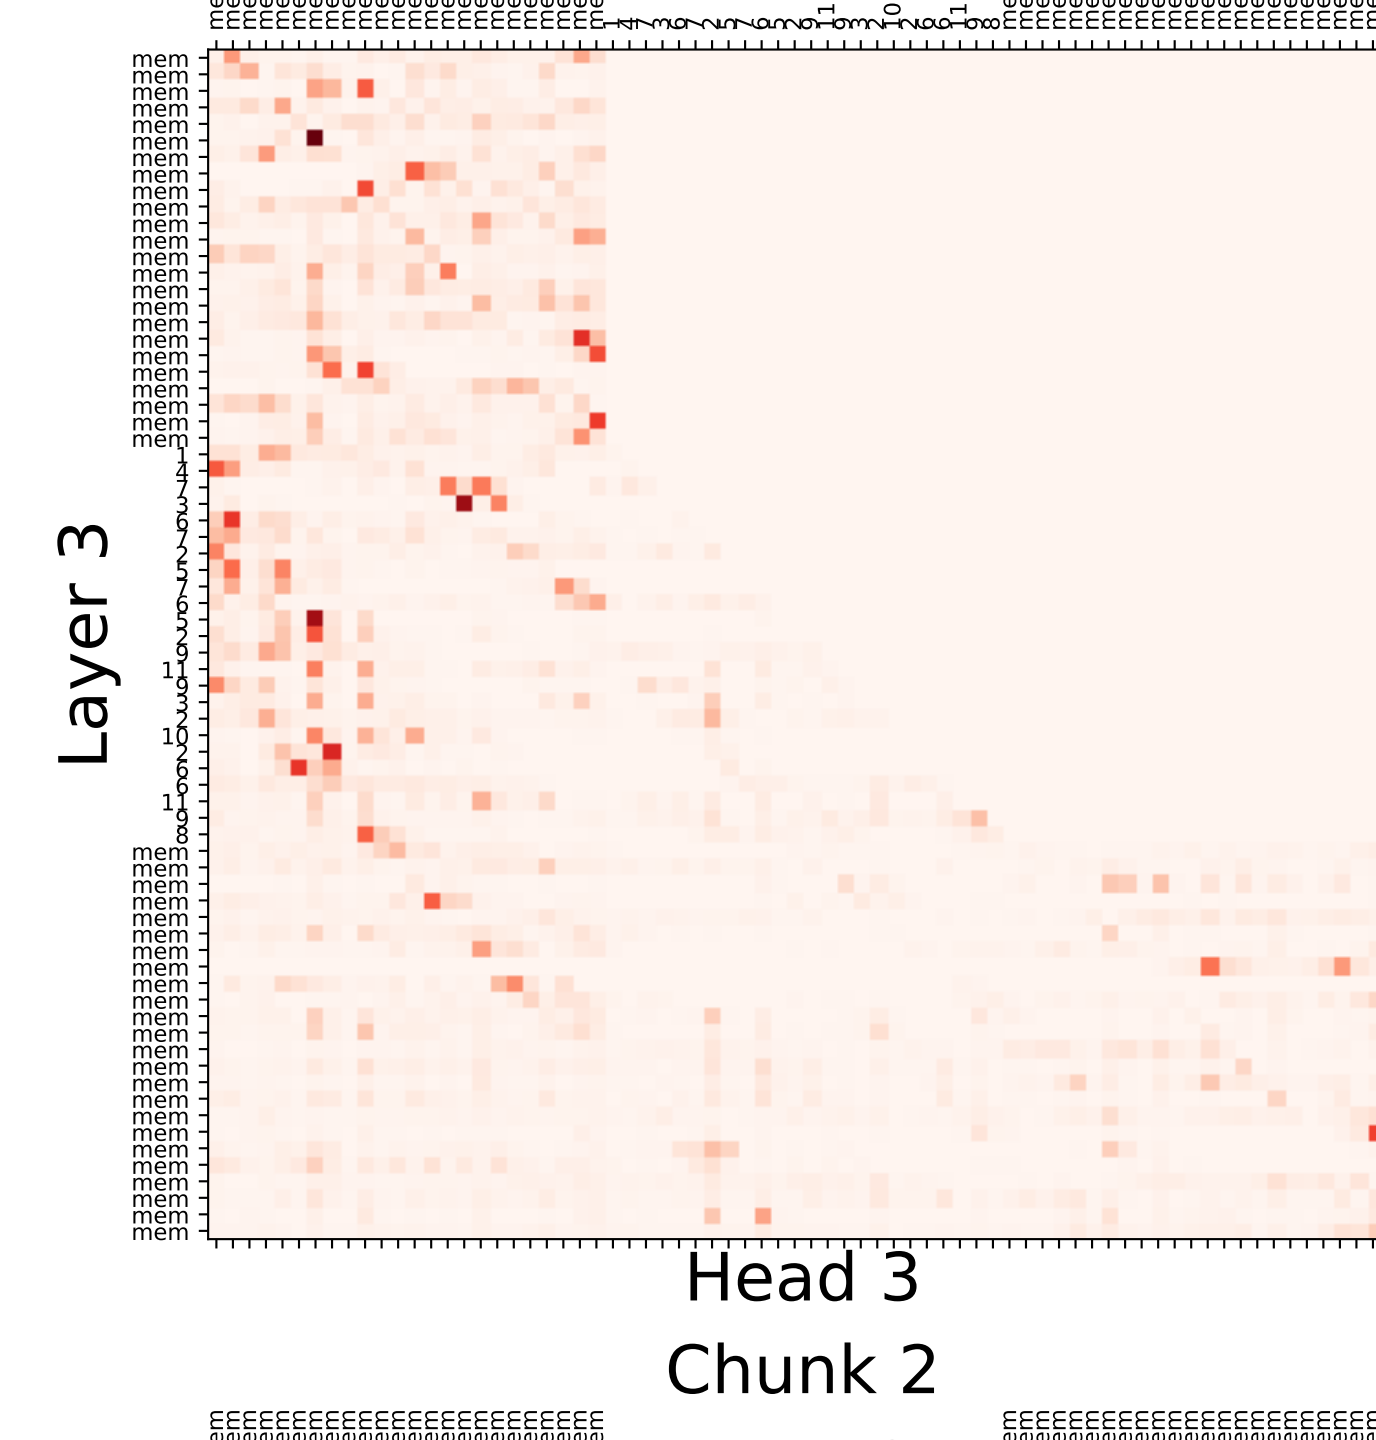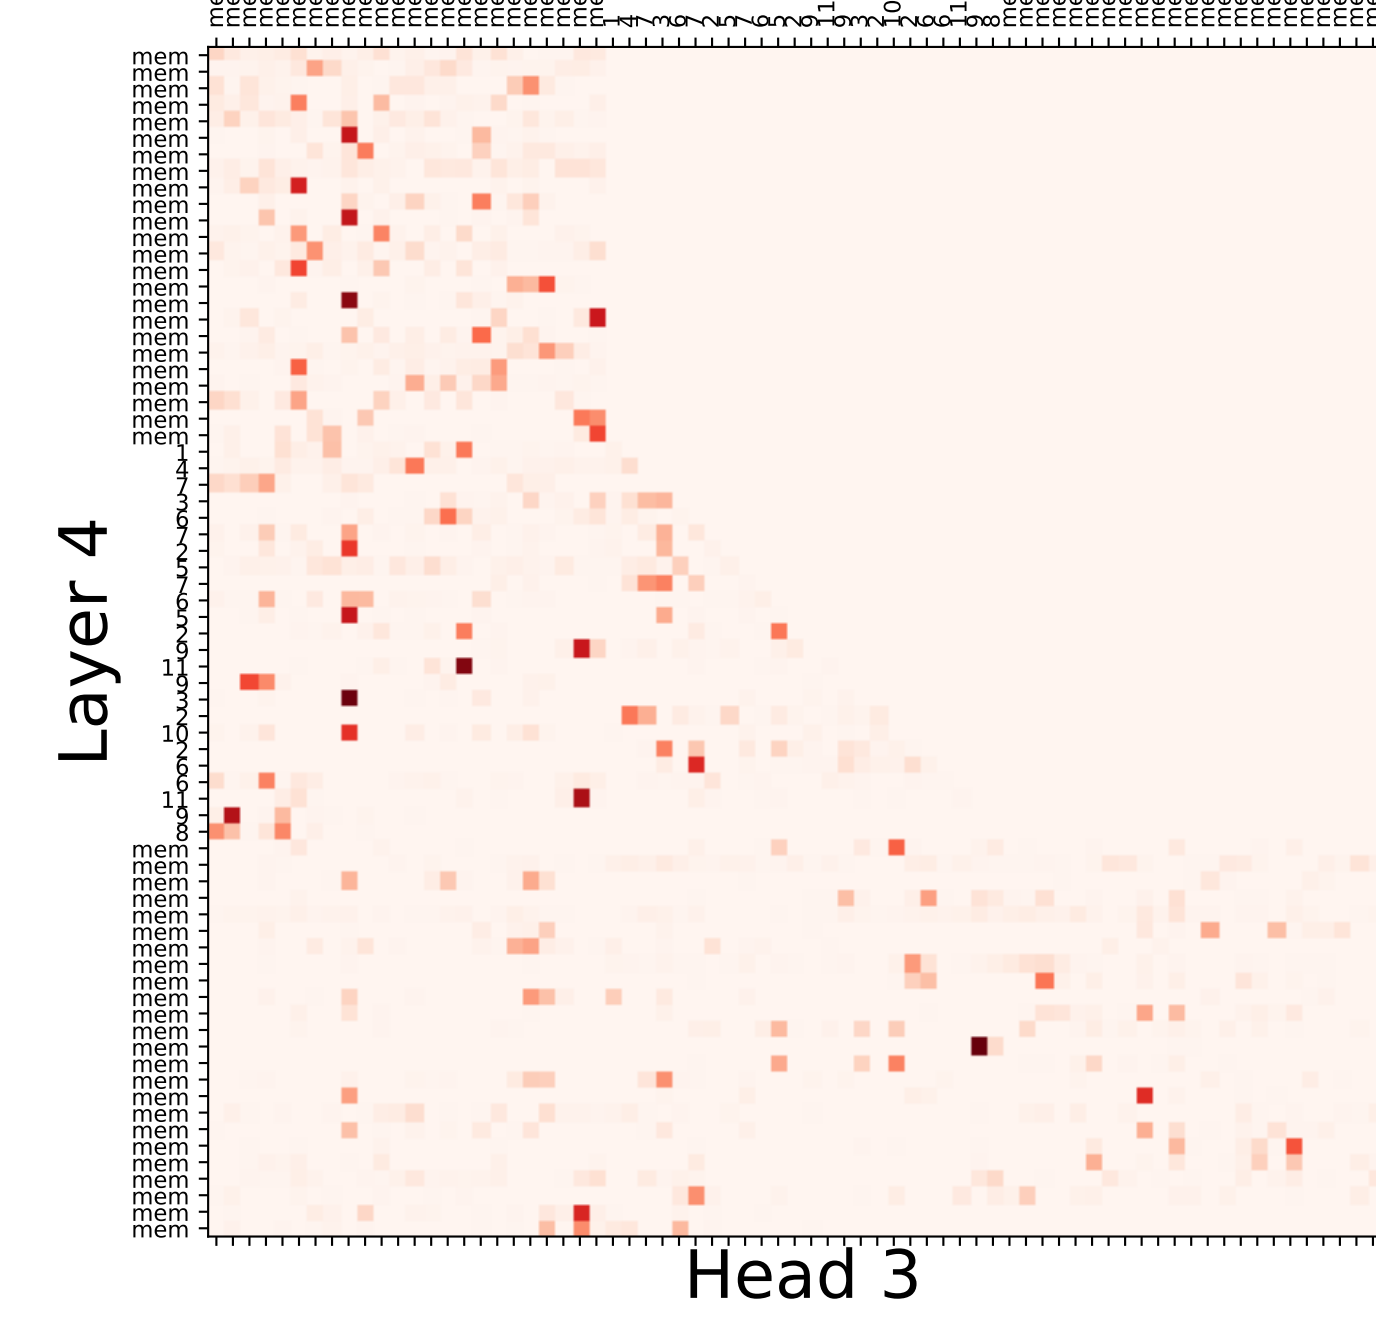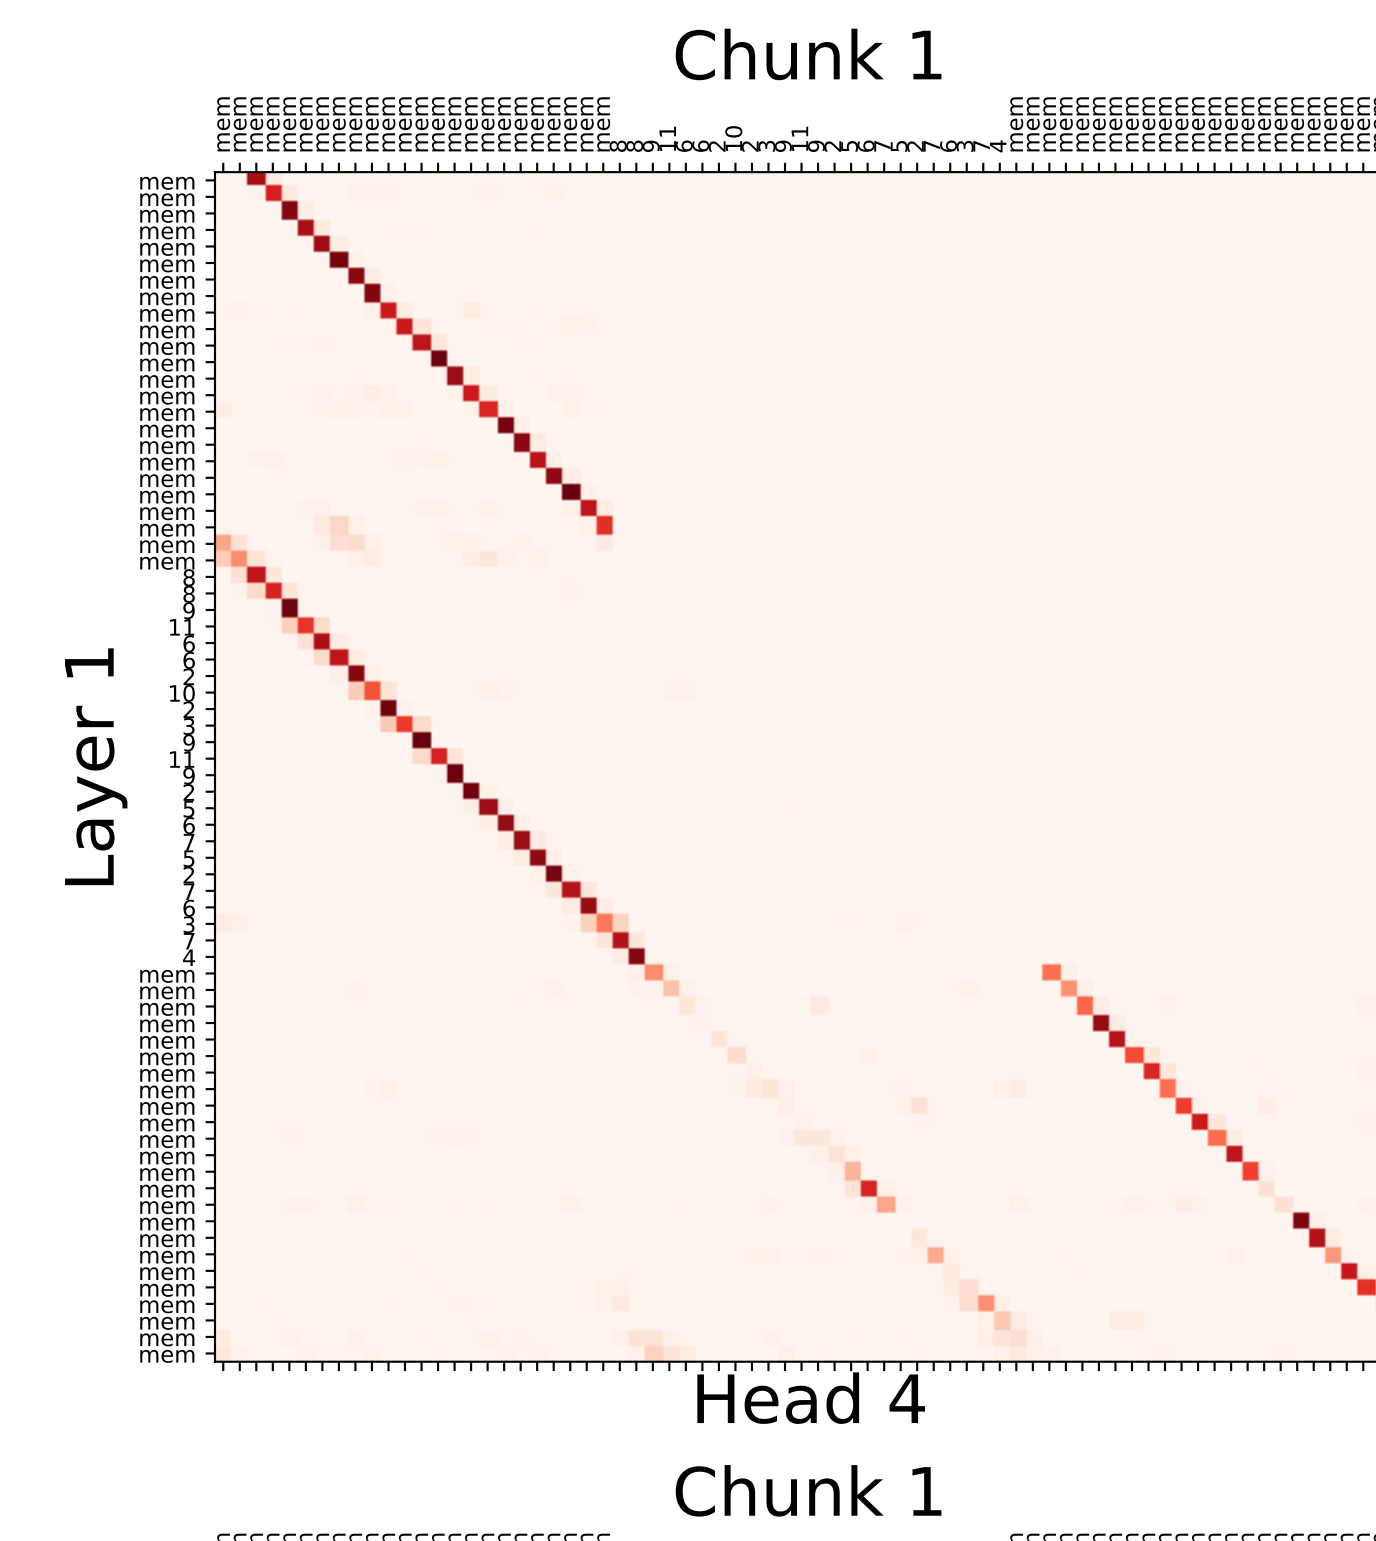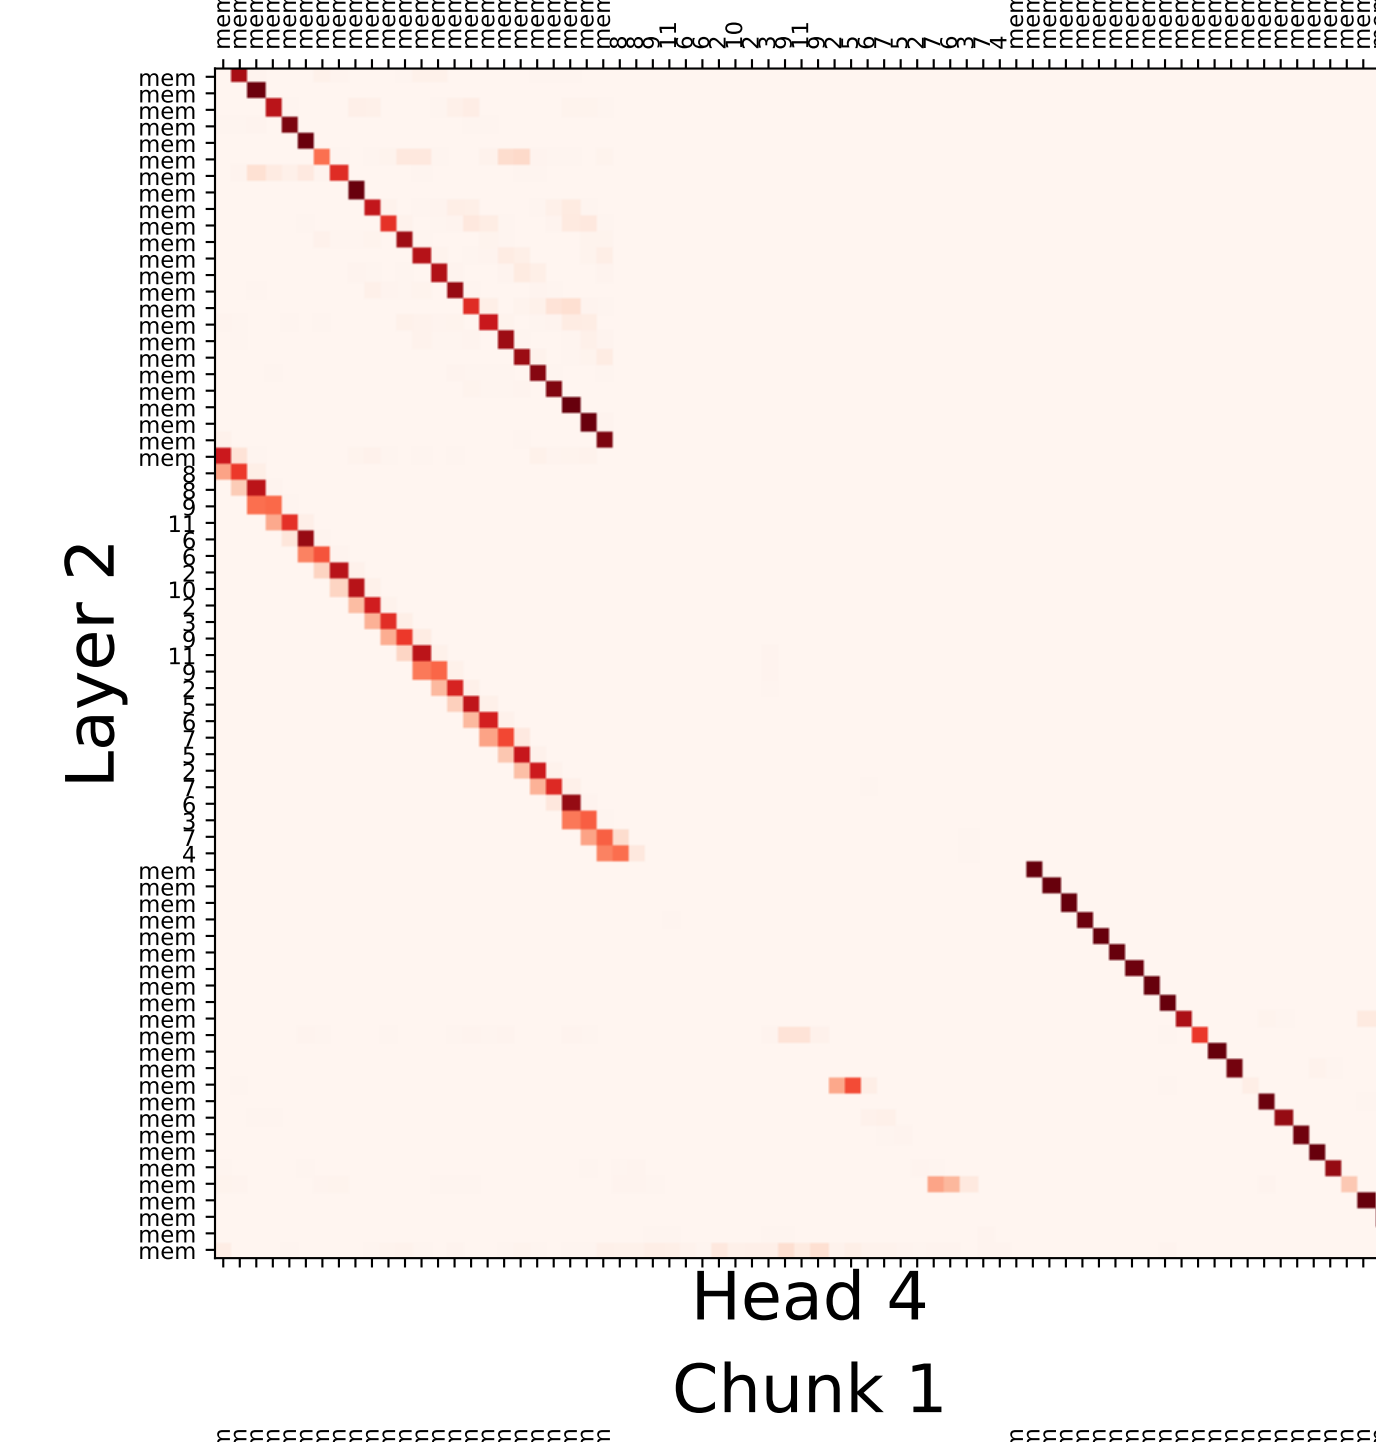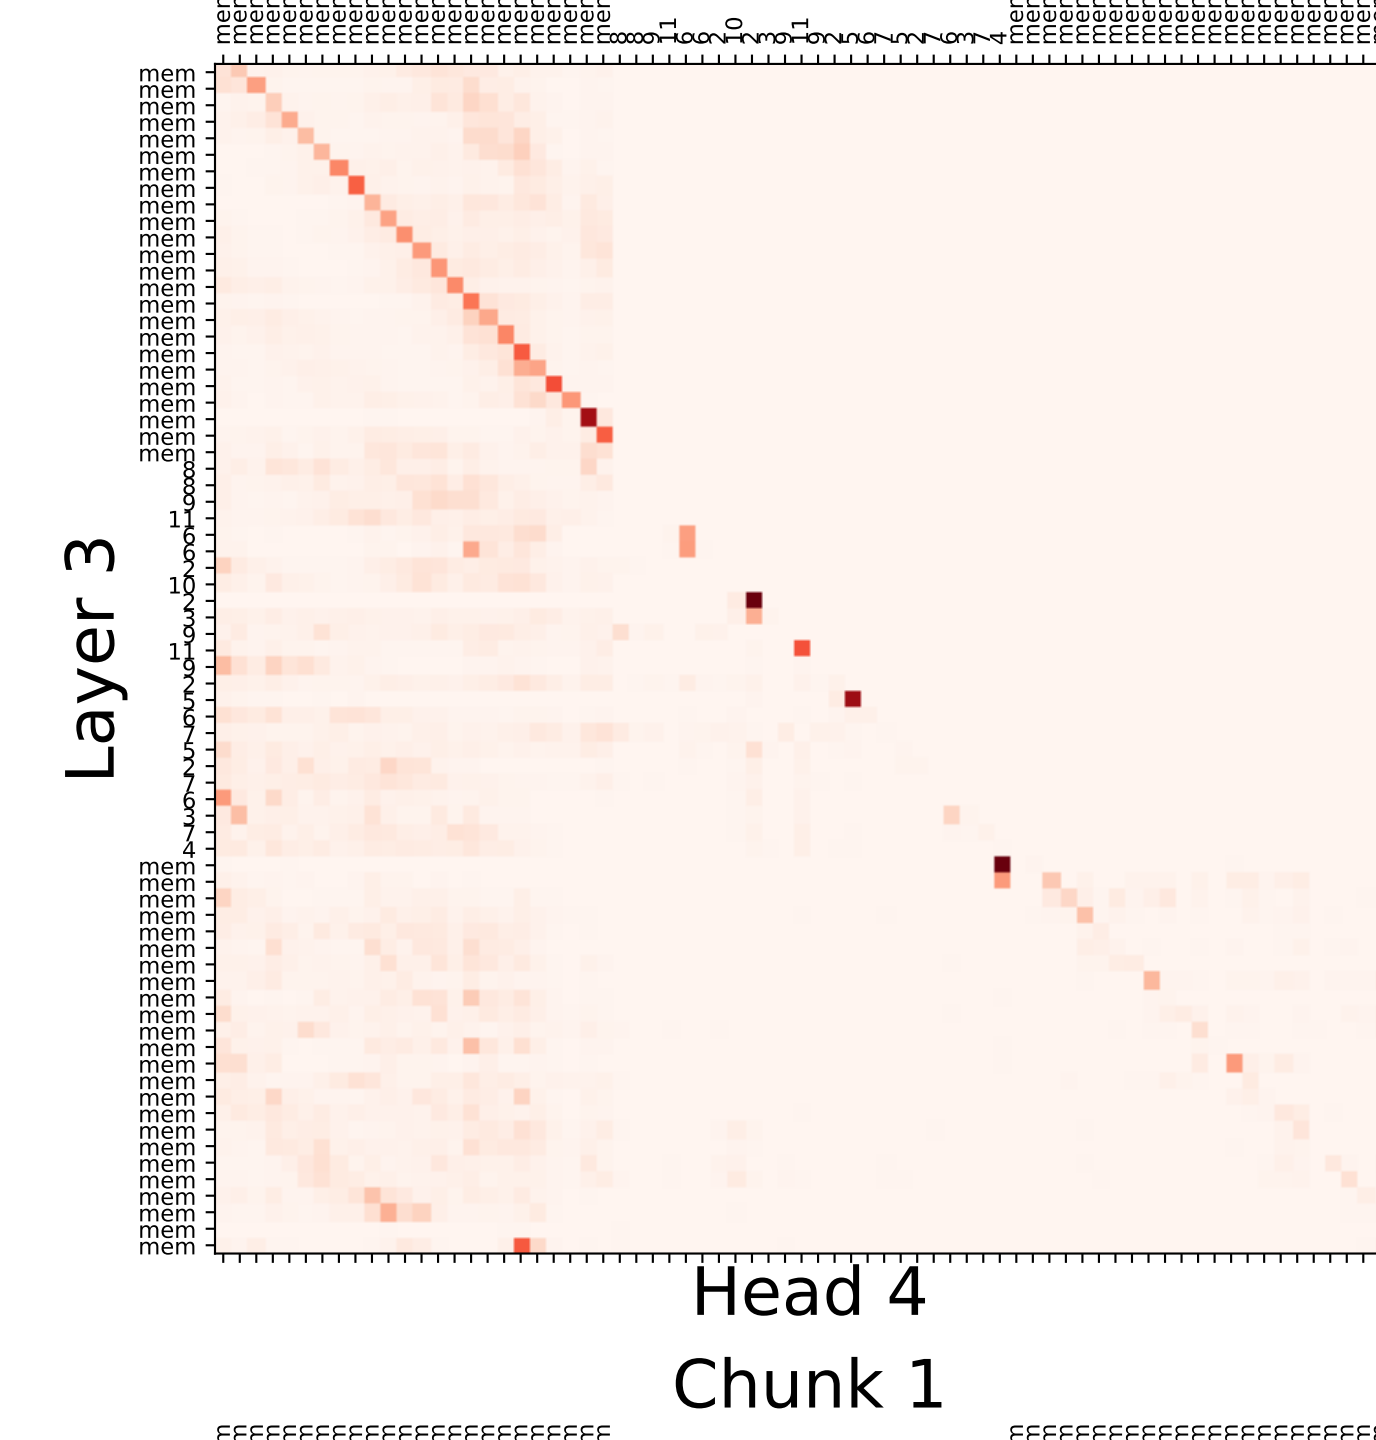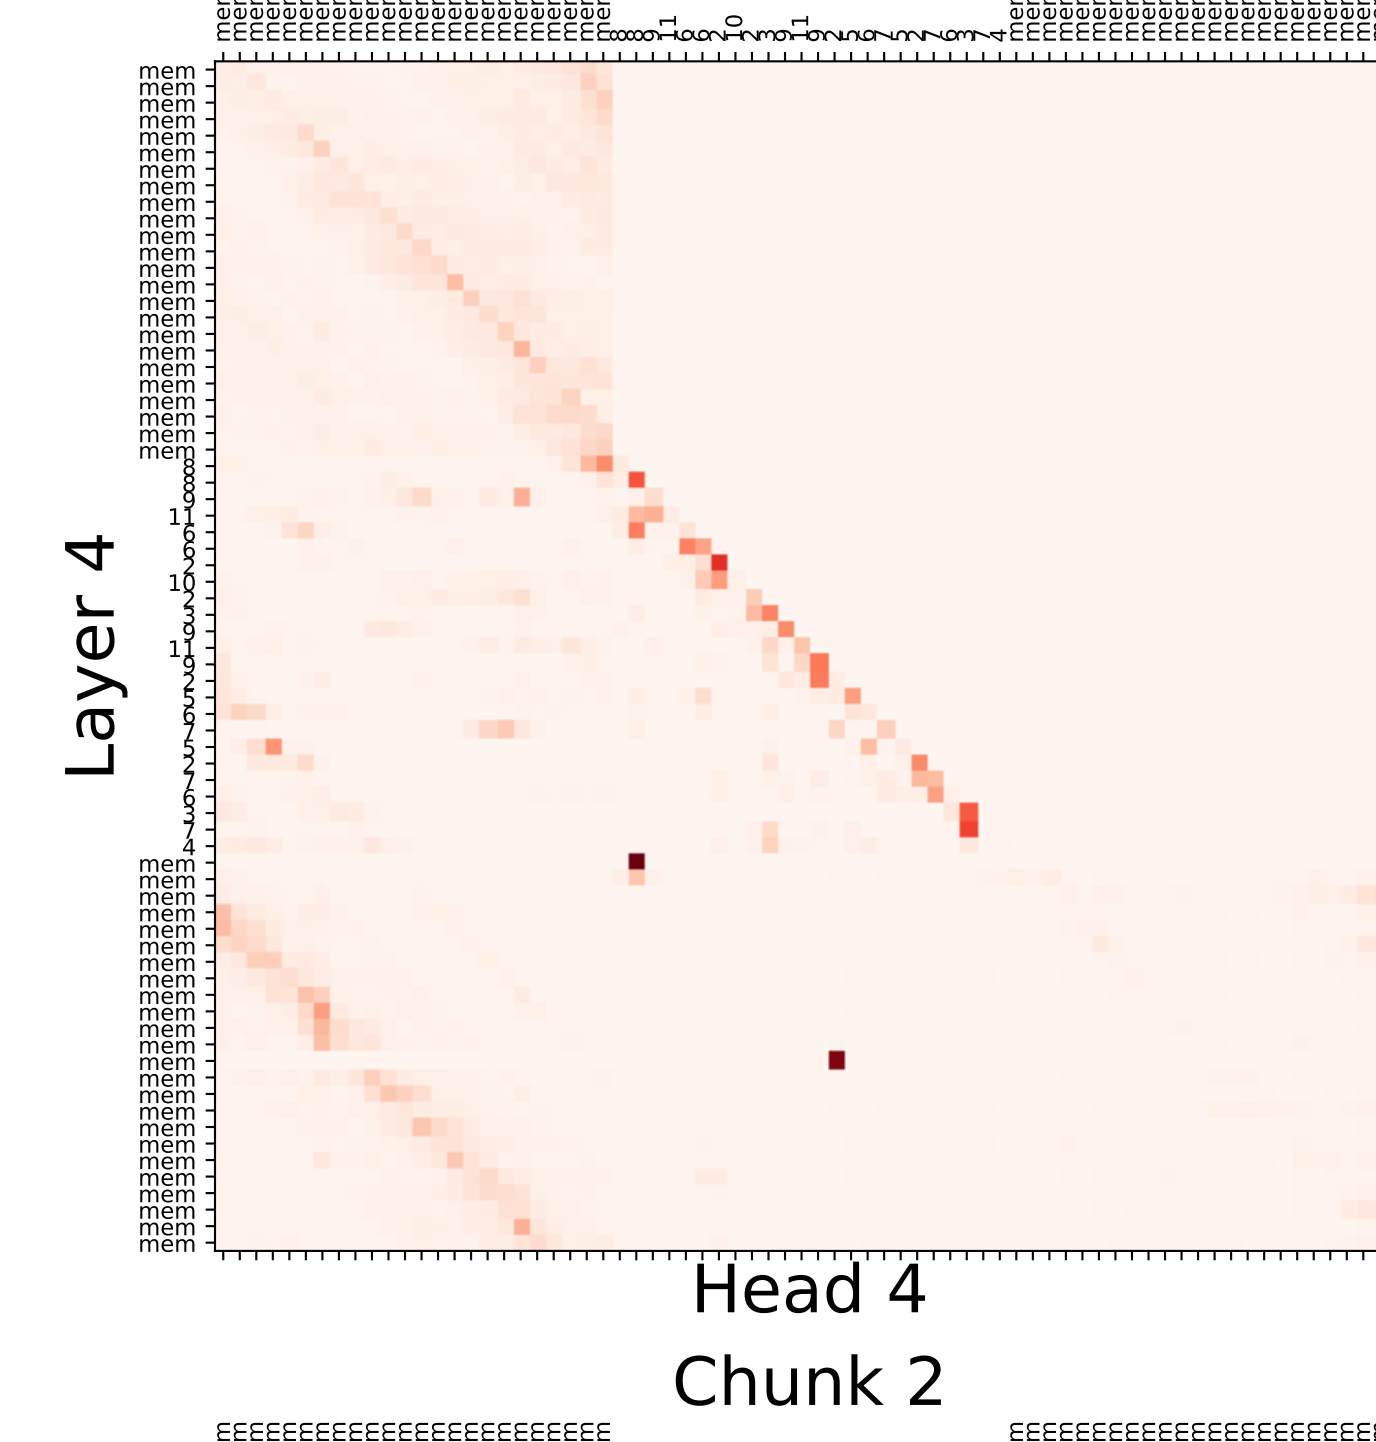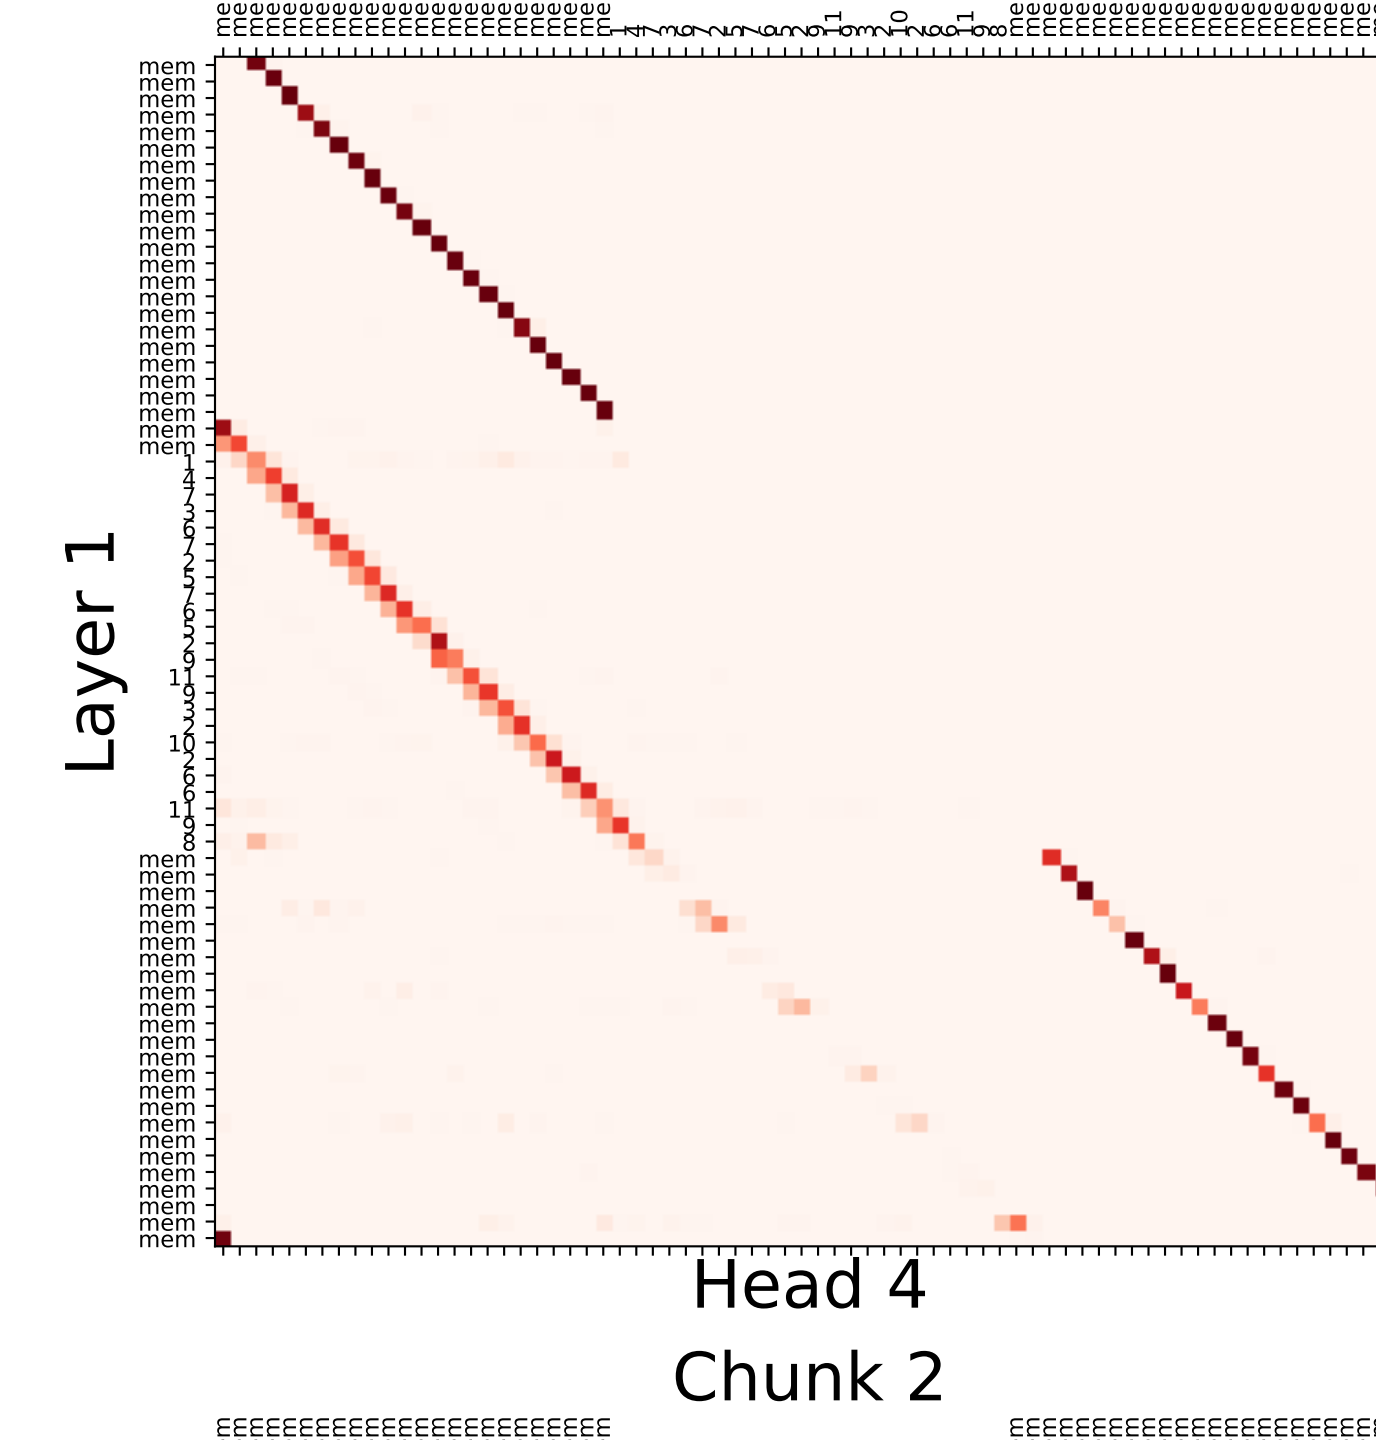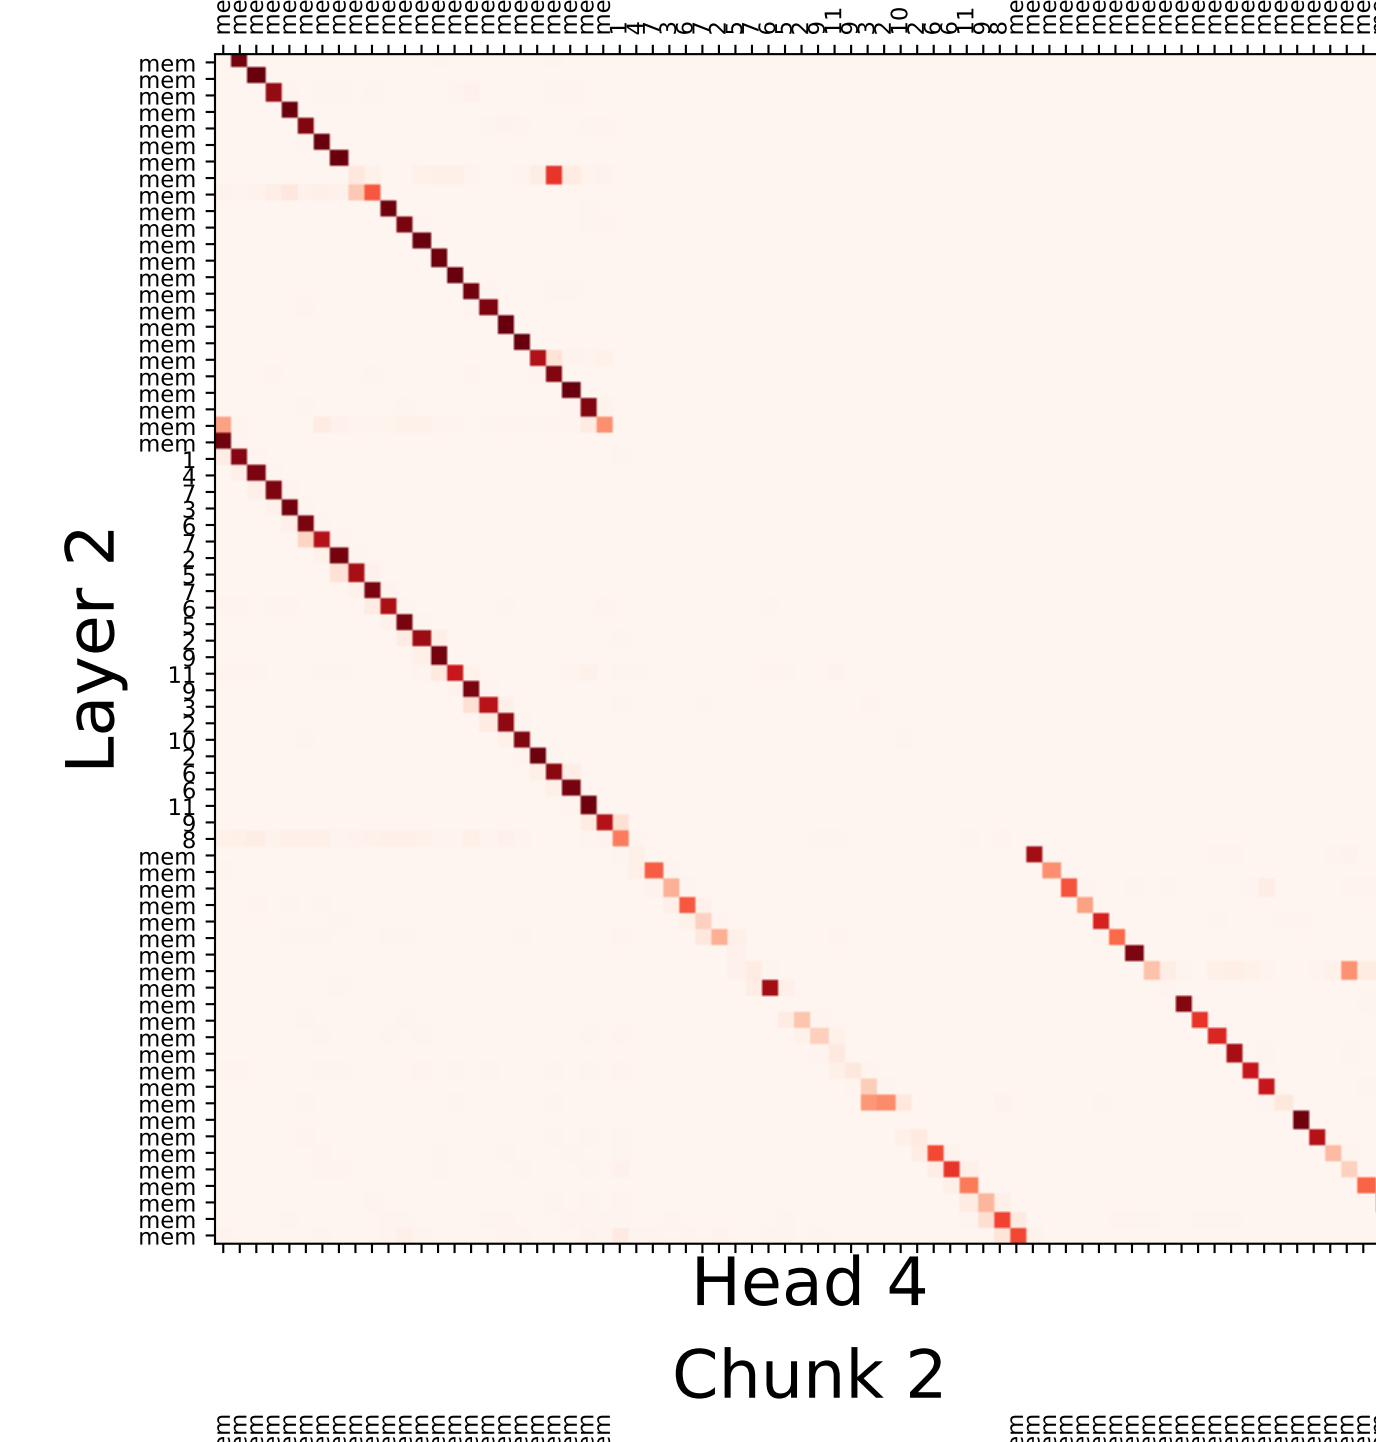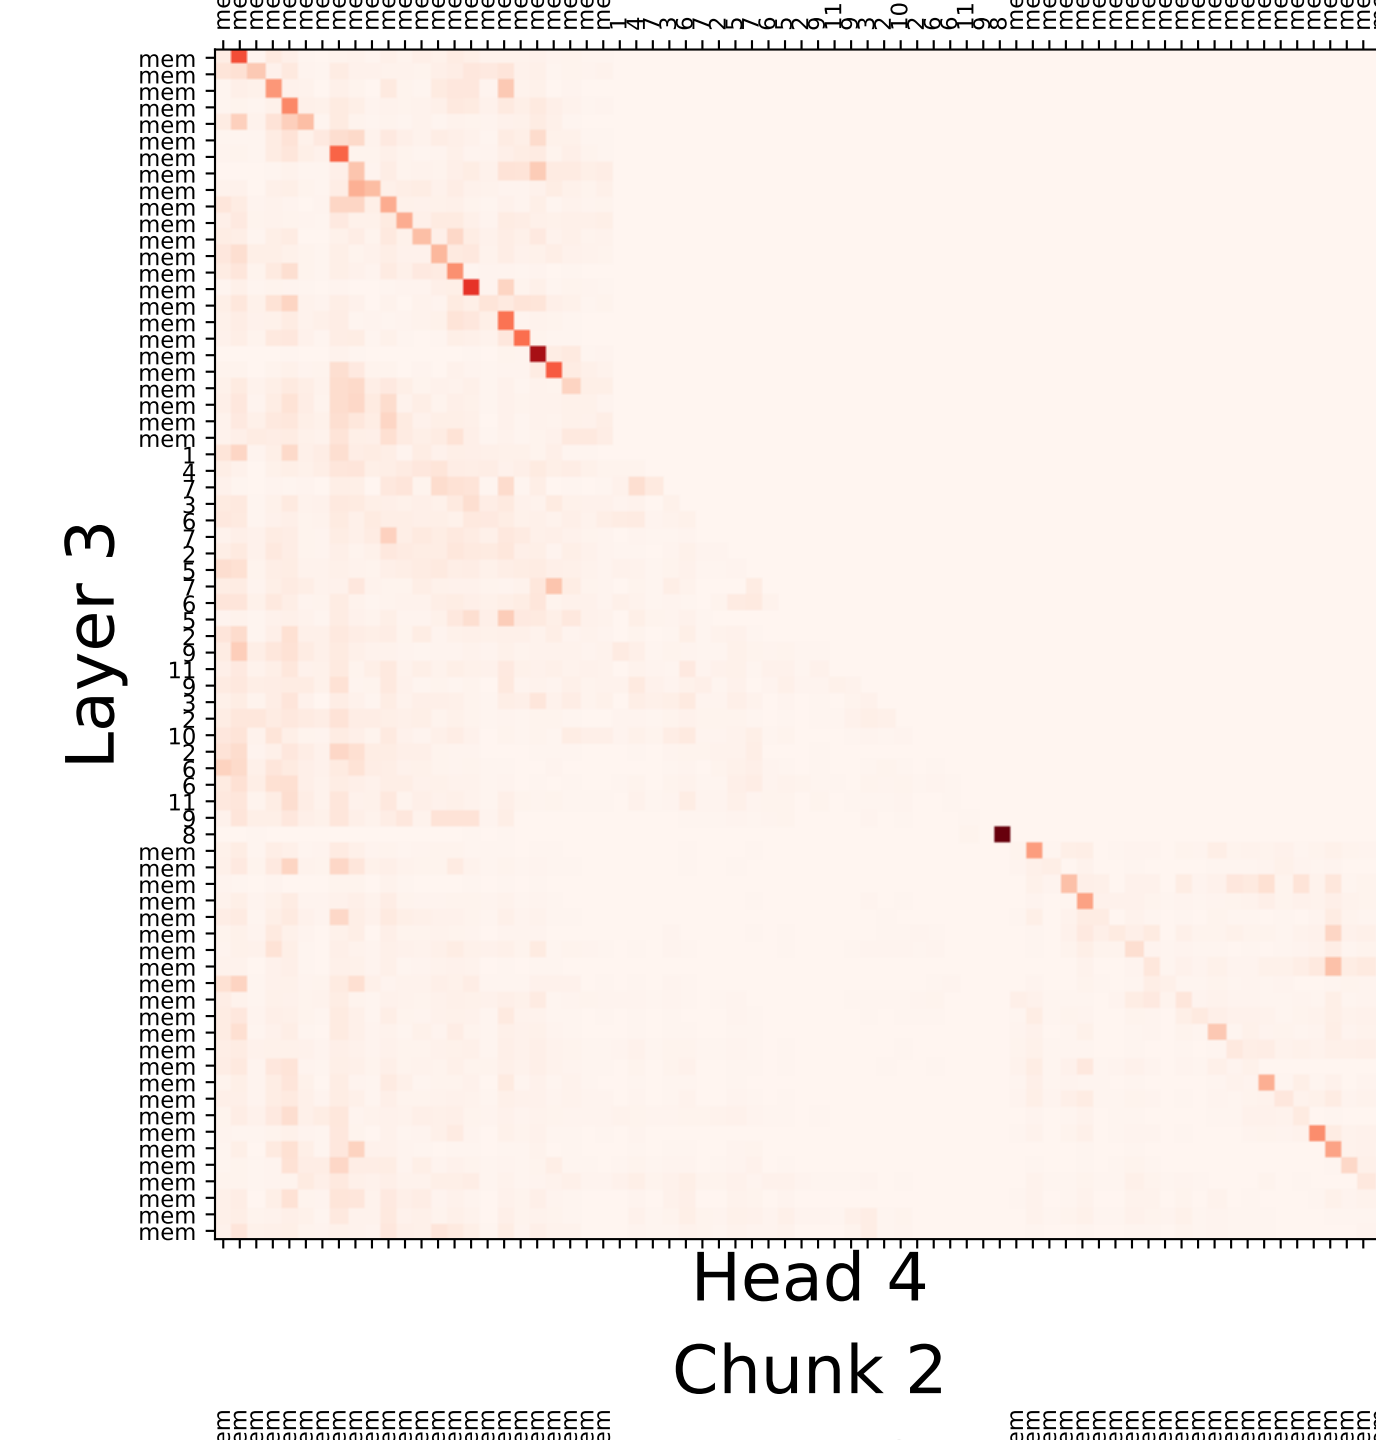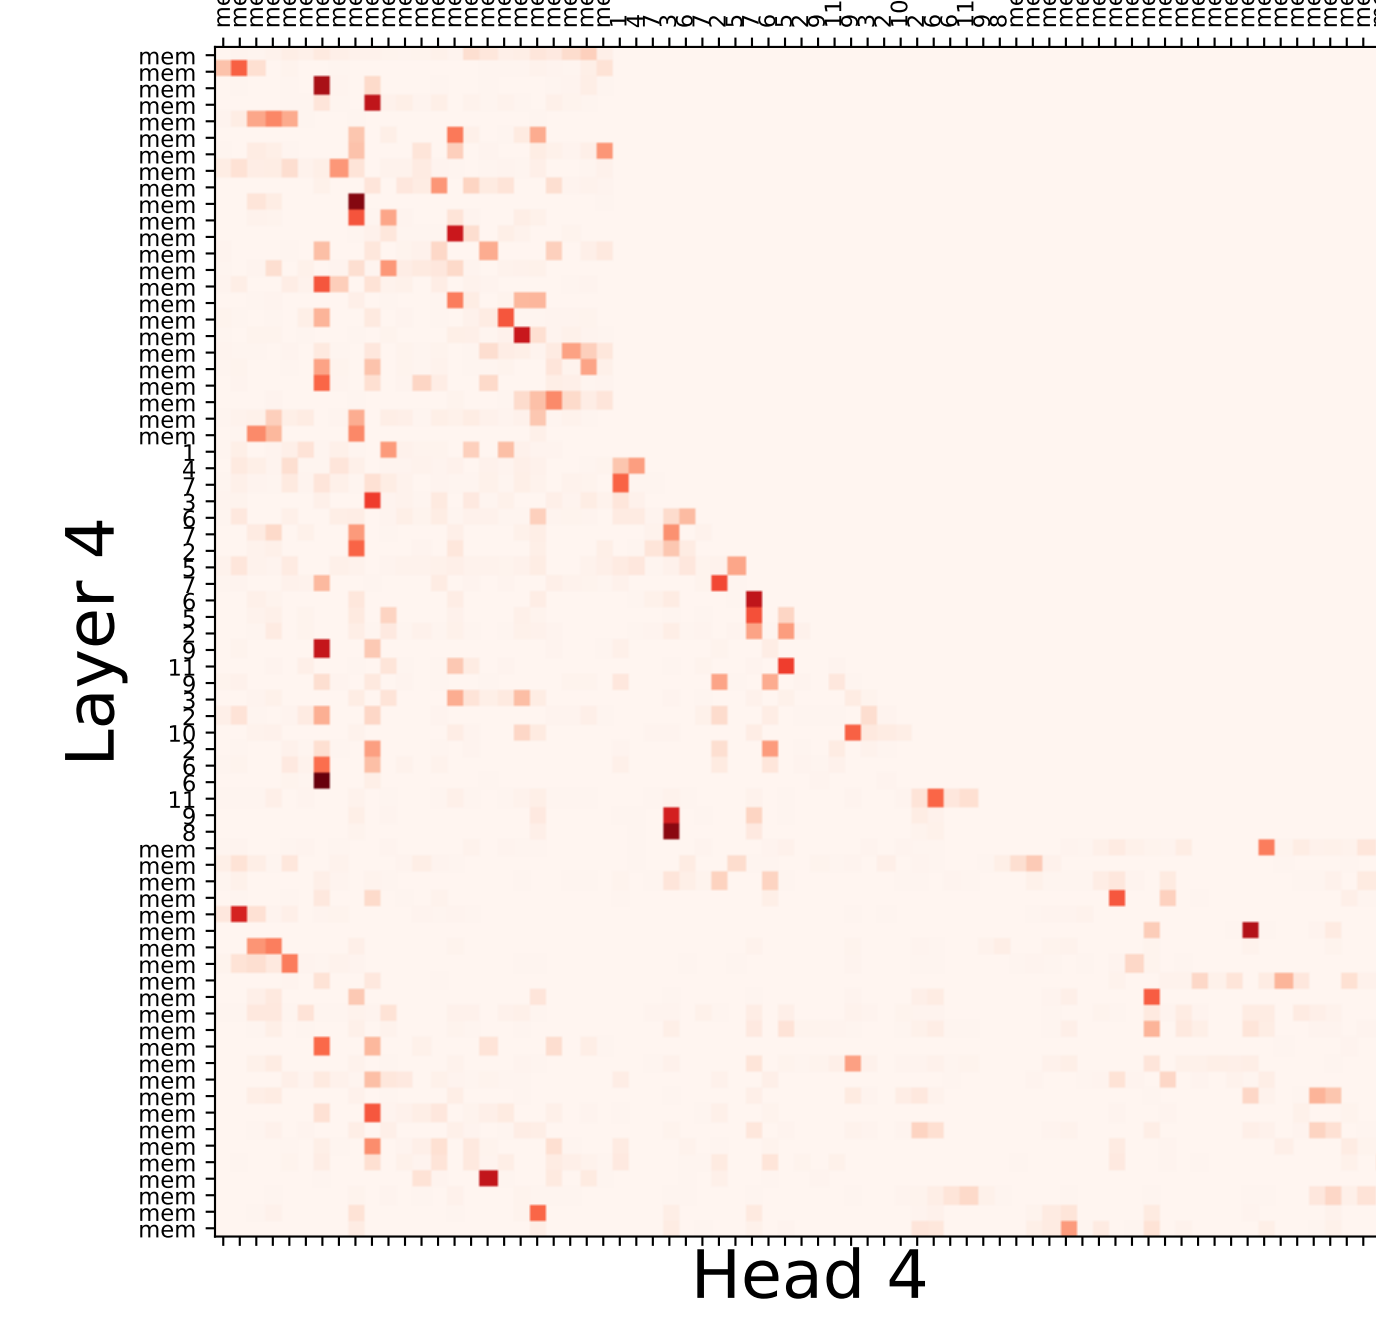

Supplement: Supplementary file 1 [file 47e288629a6996a17ce50b90a056a0e1-Supplemental-Conference.zip › RMT_supp/attention_maps/reverse_tl24mt24.pdf]

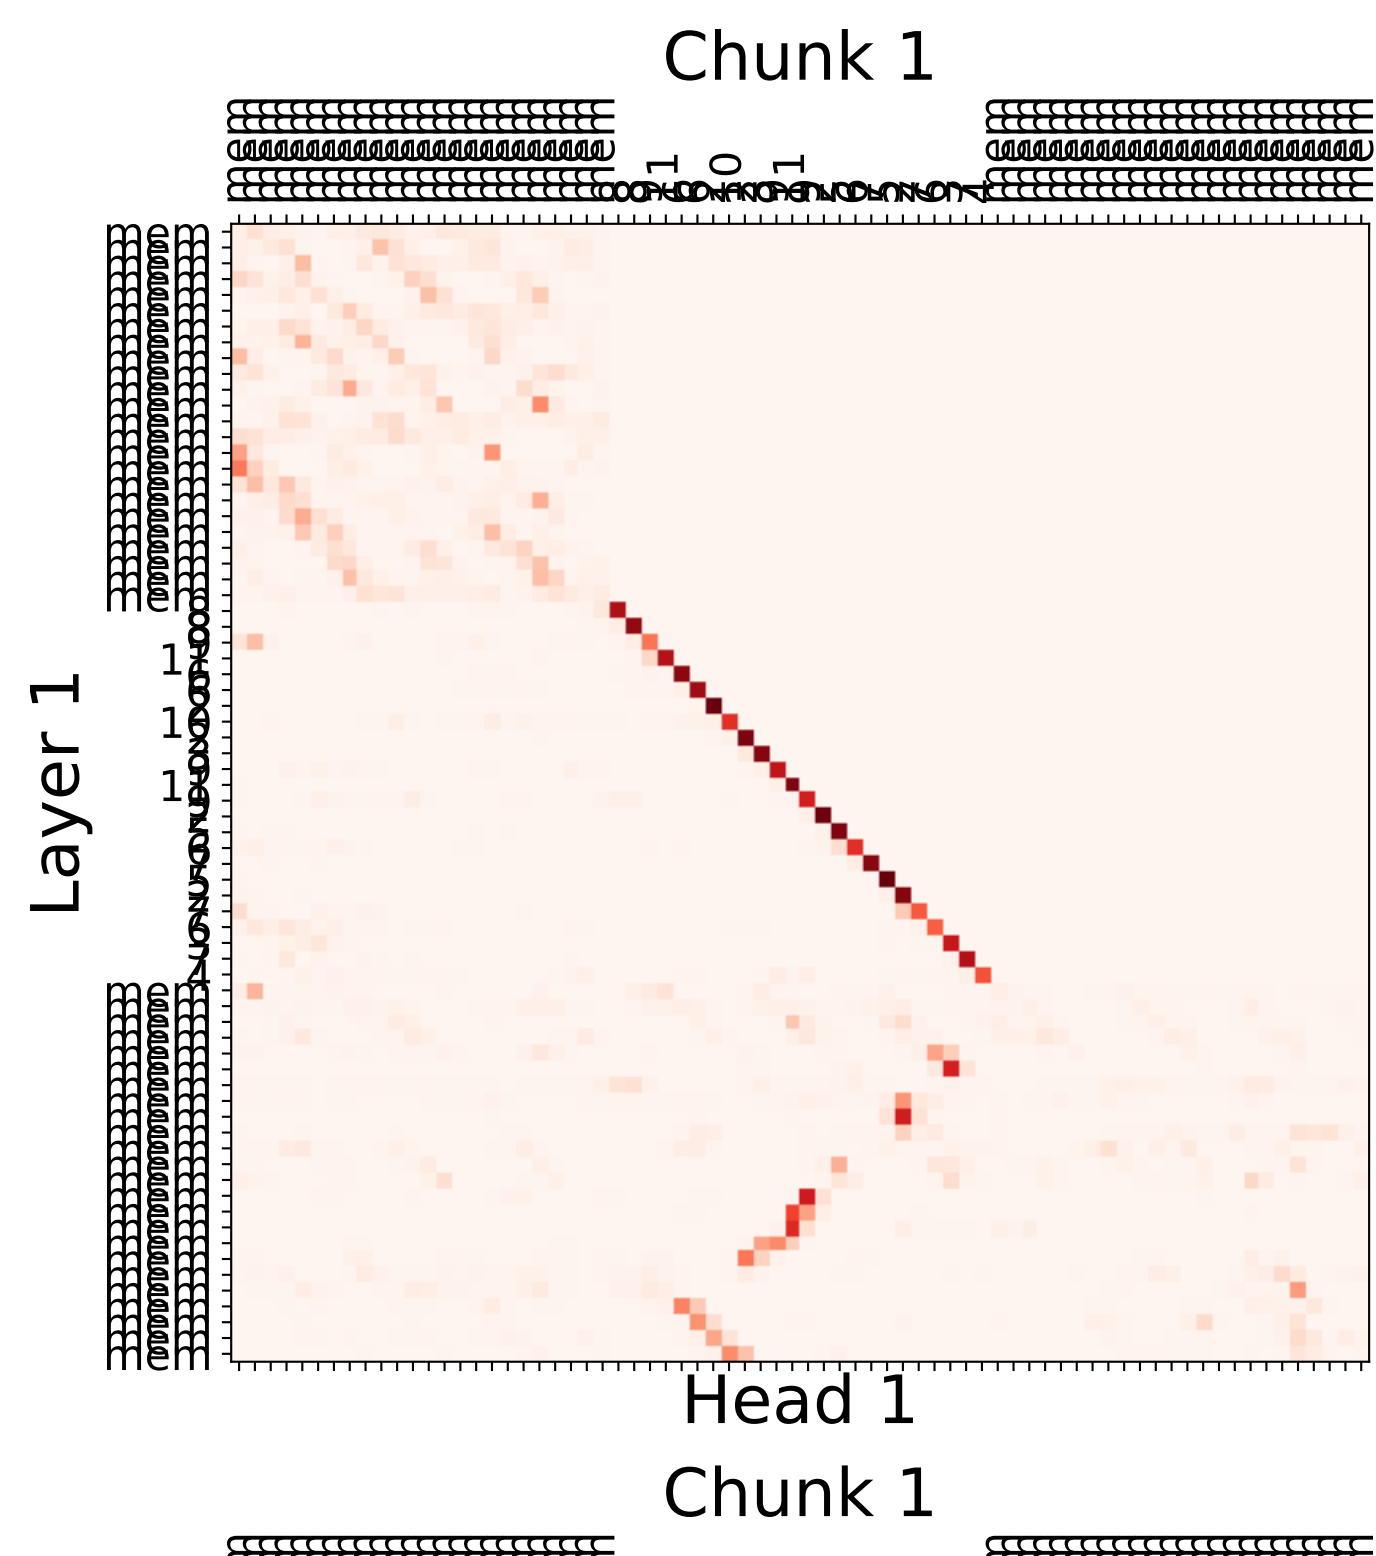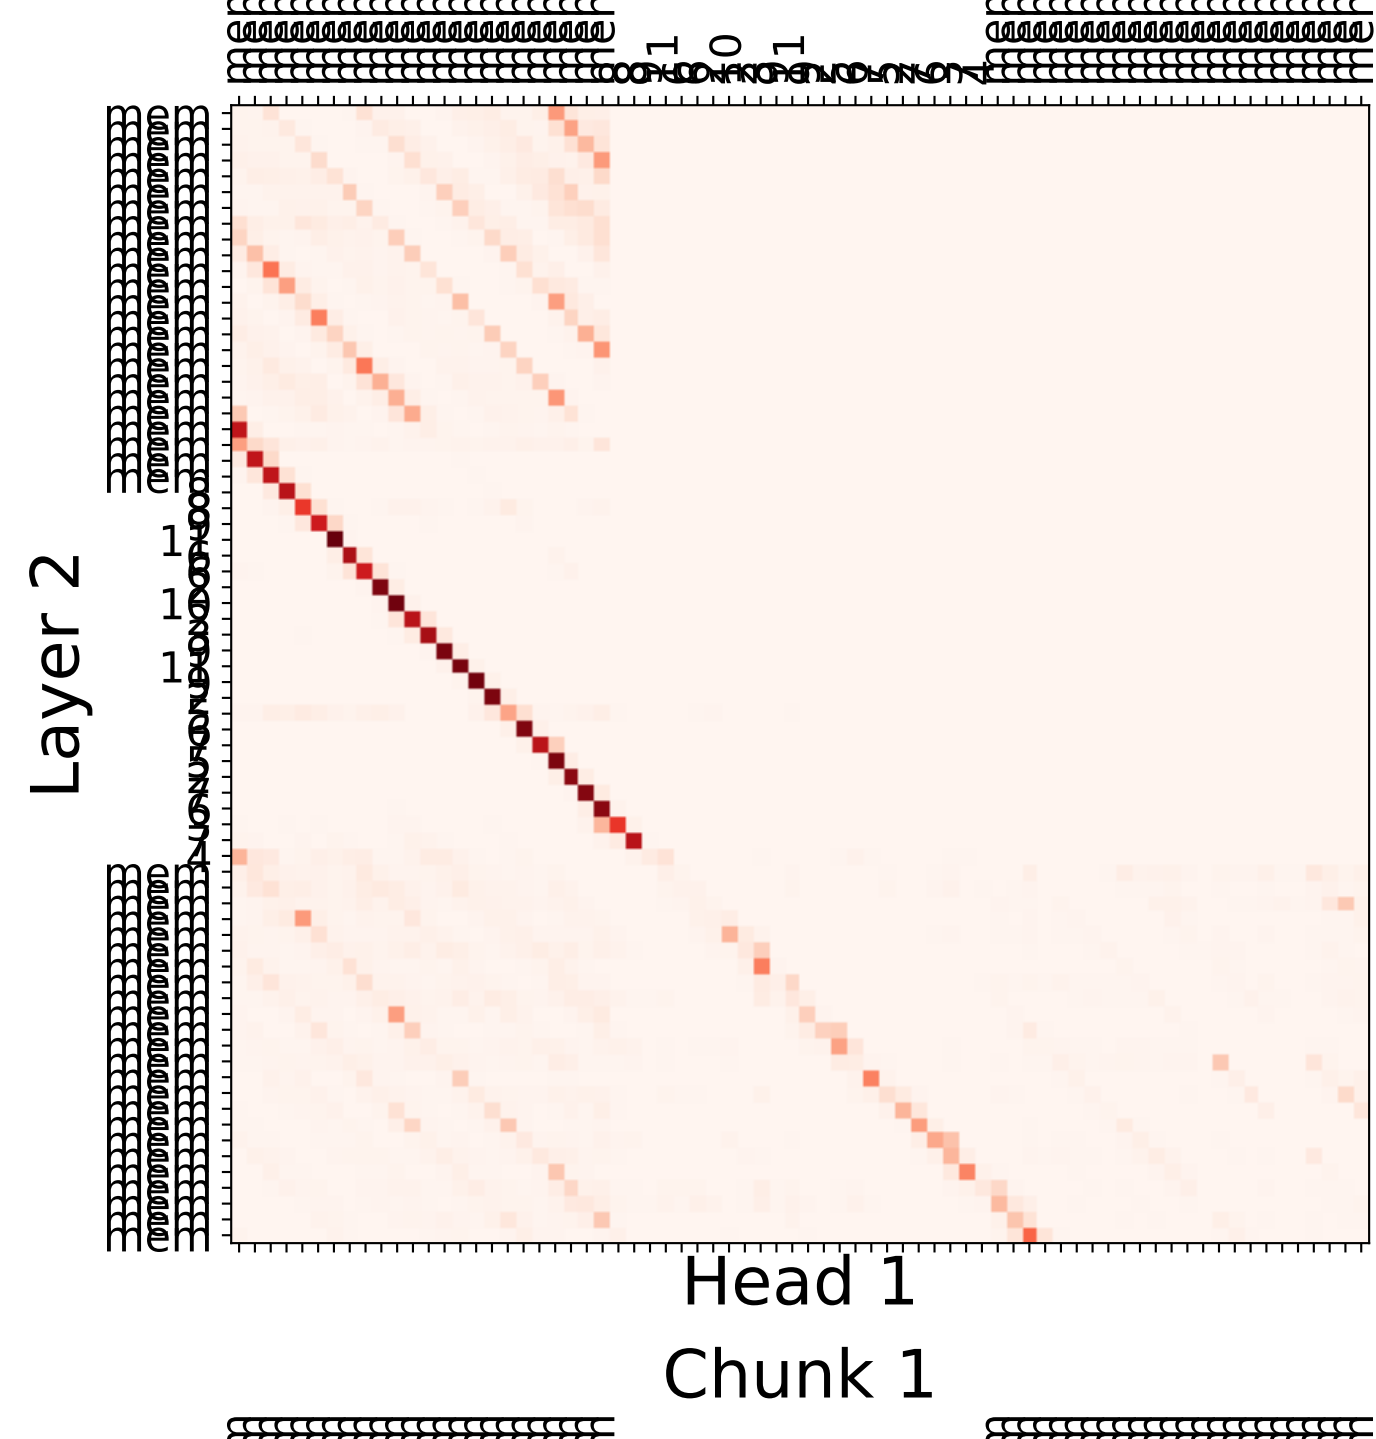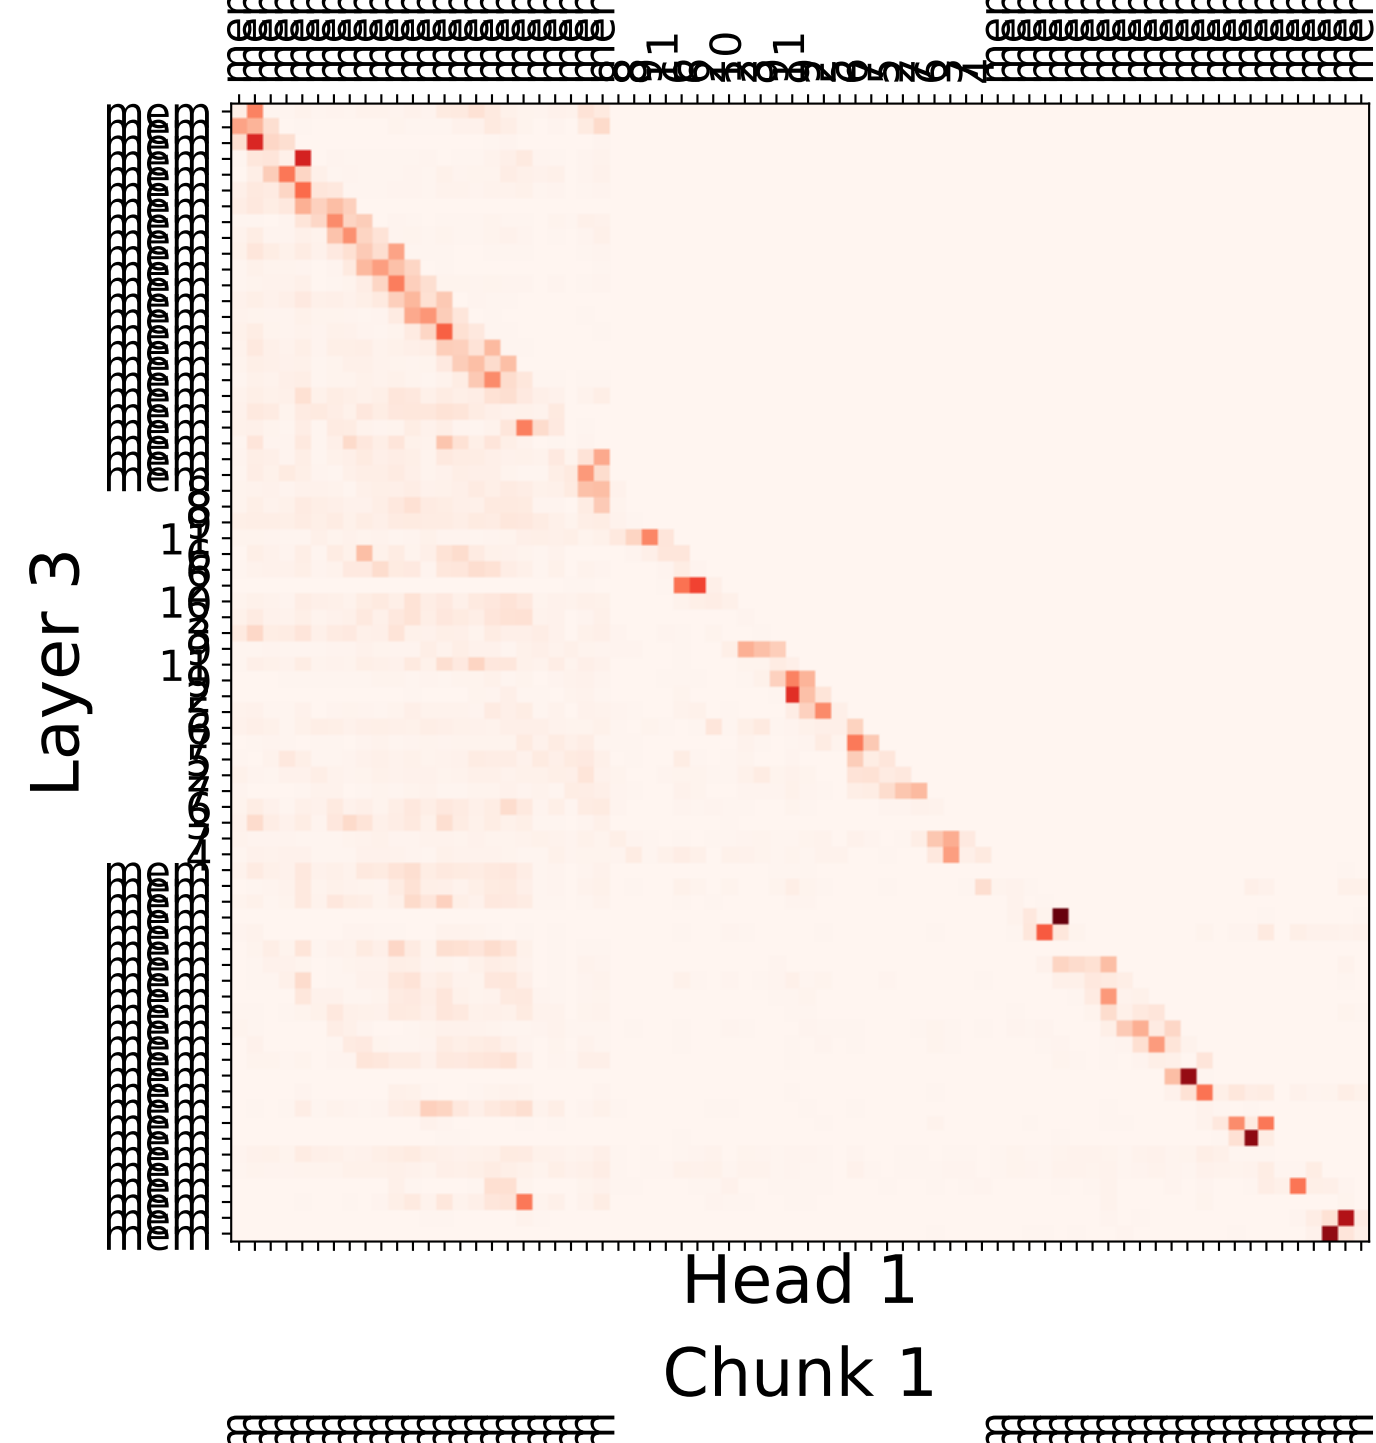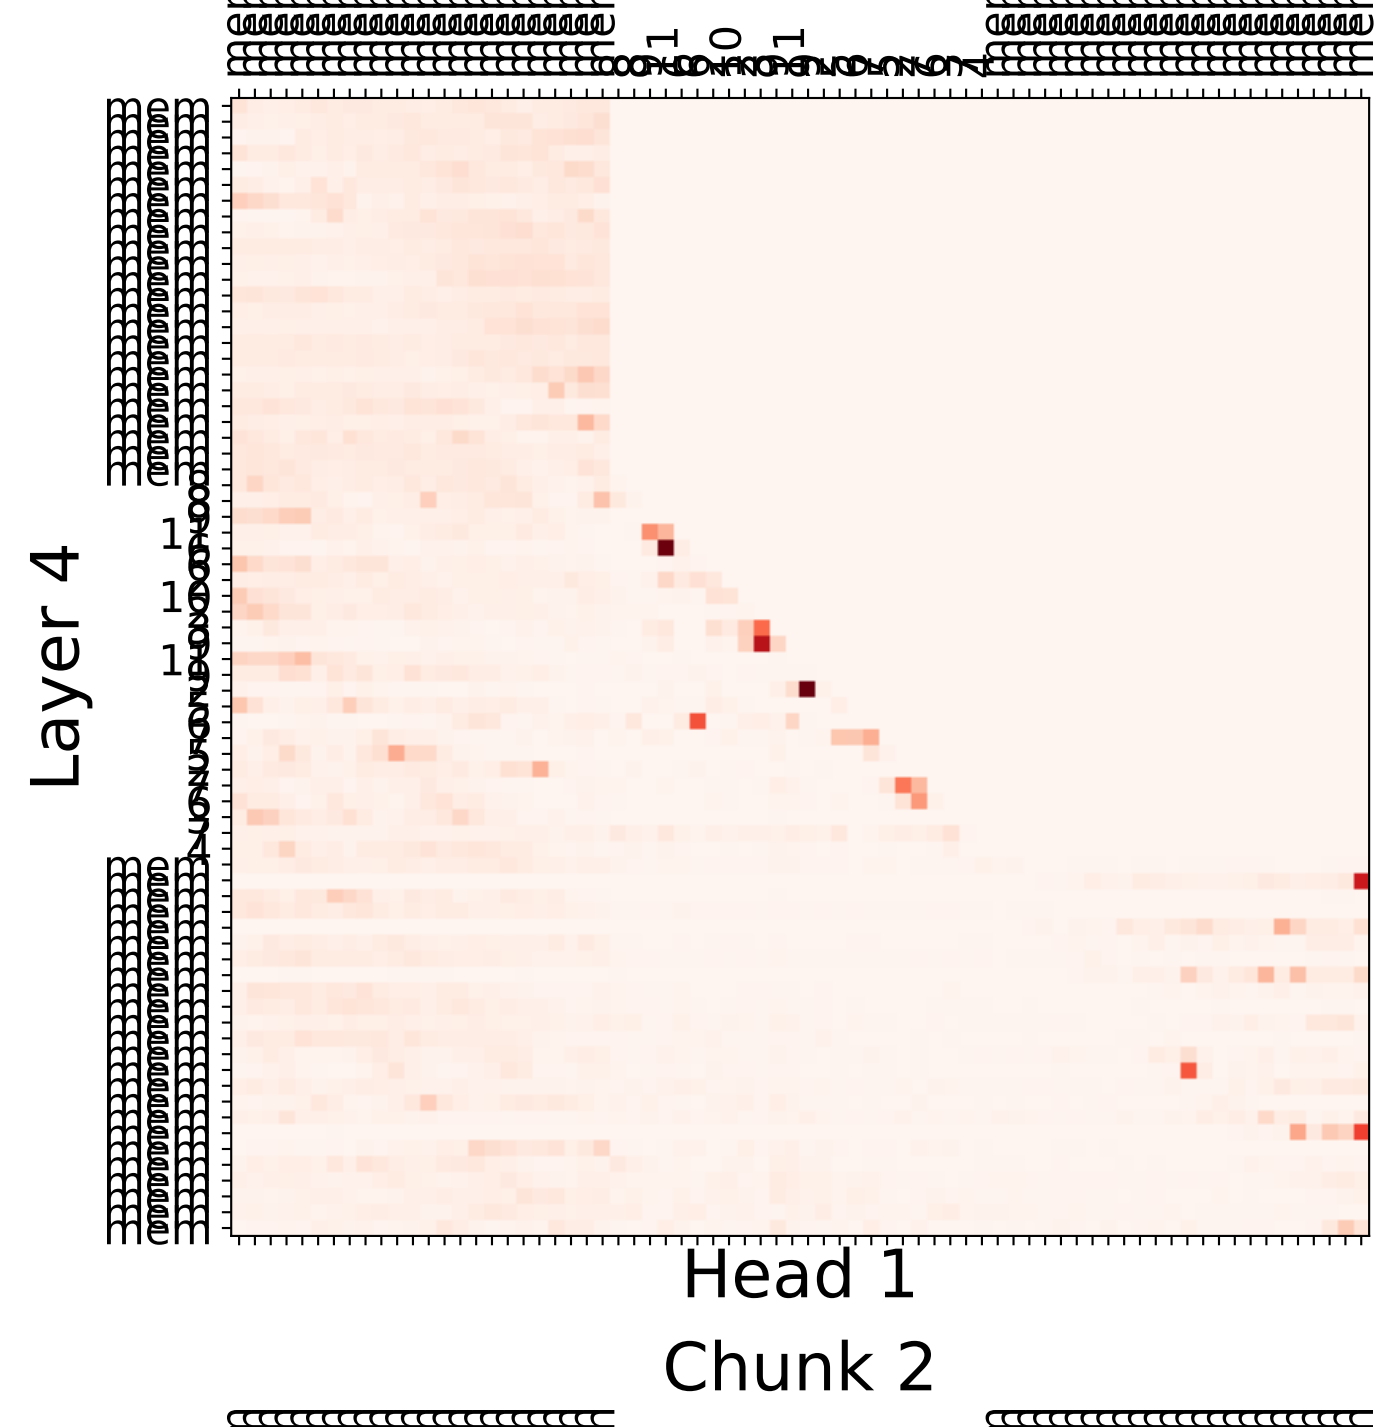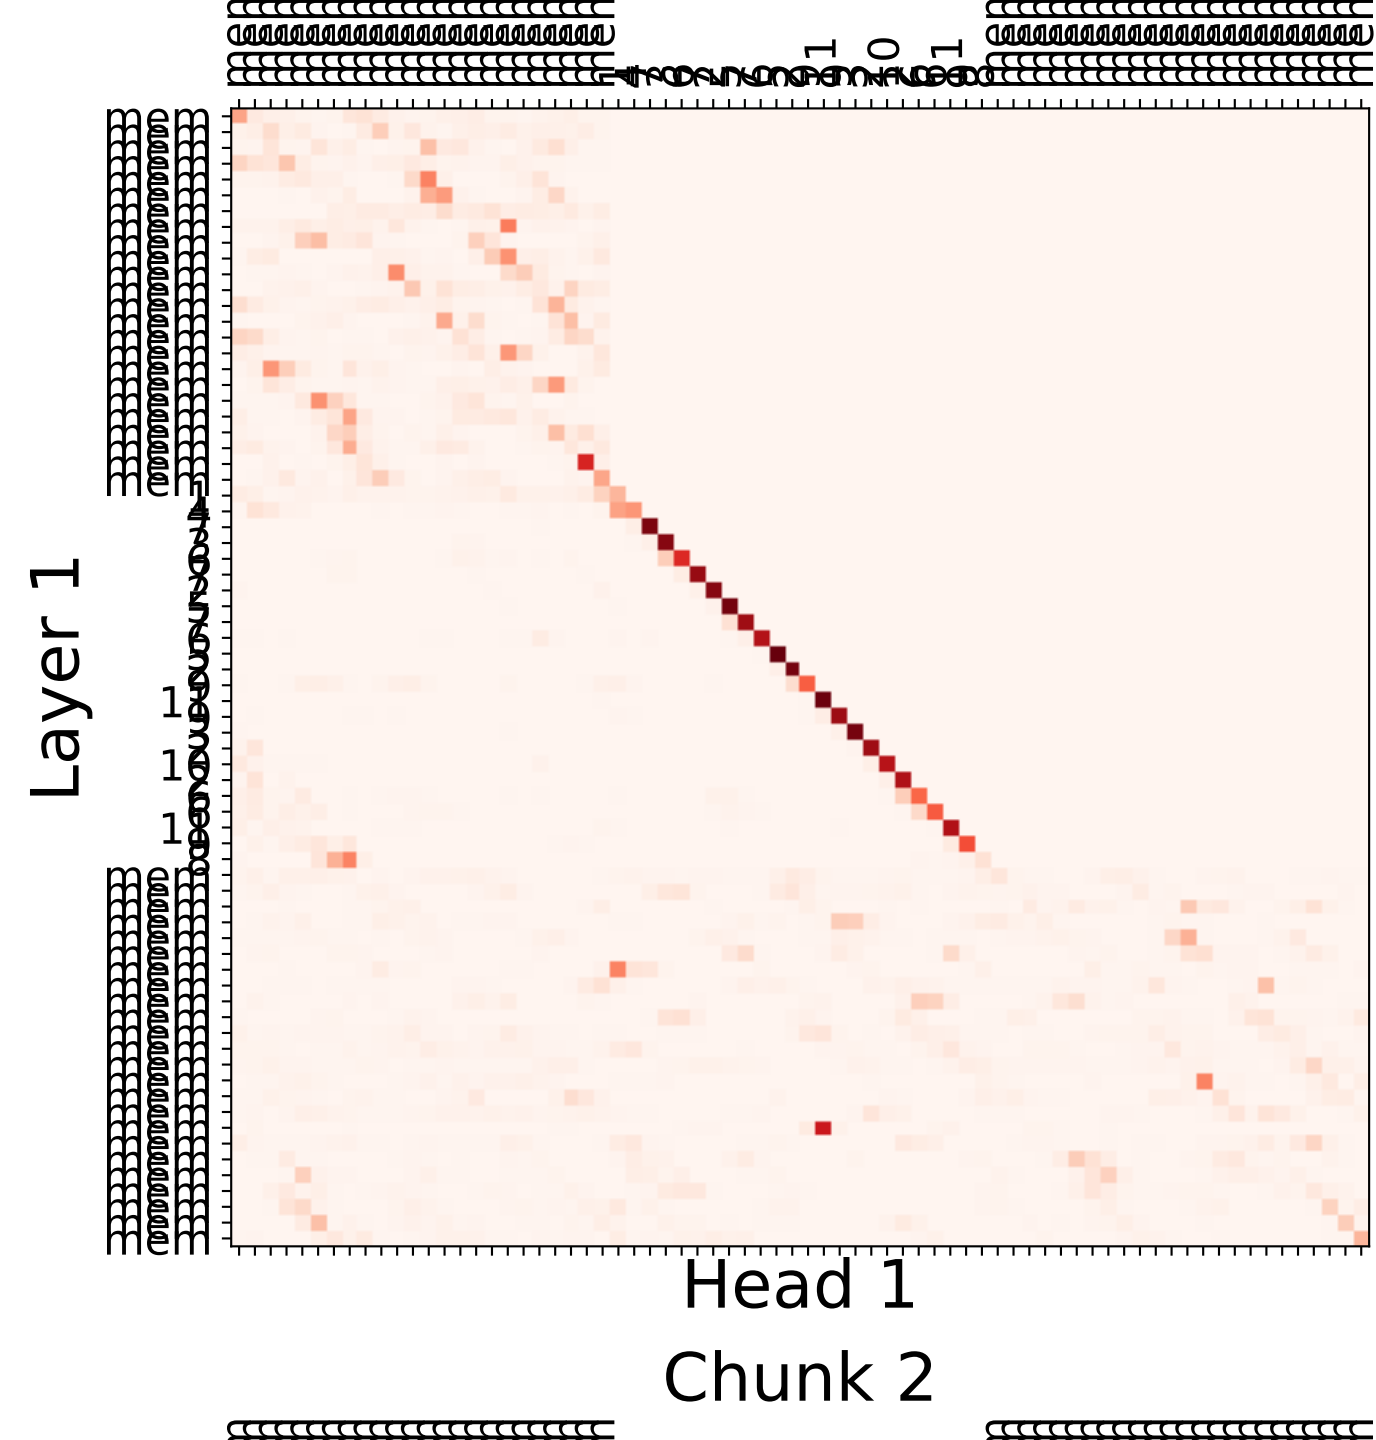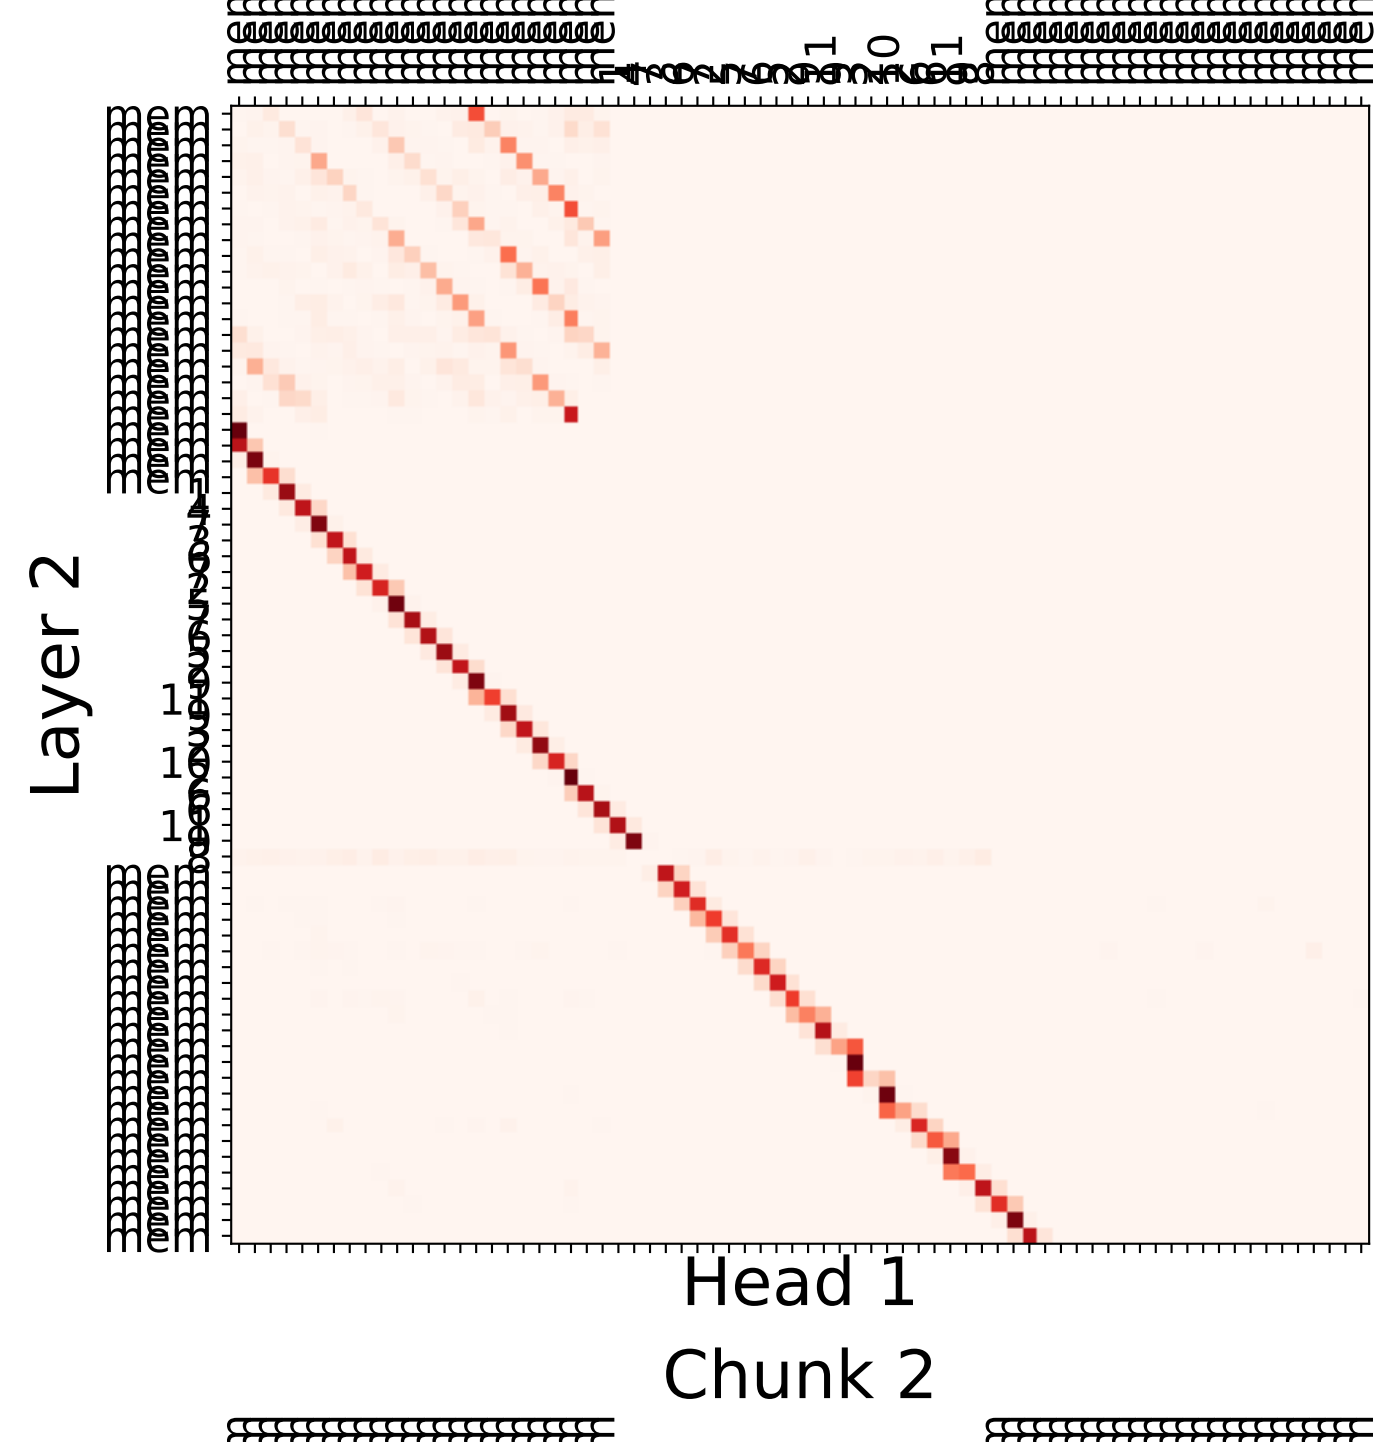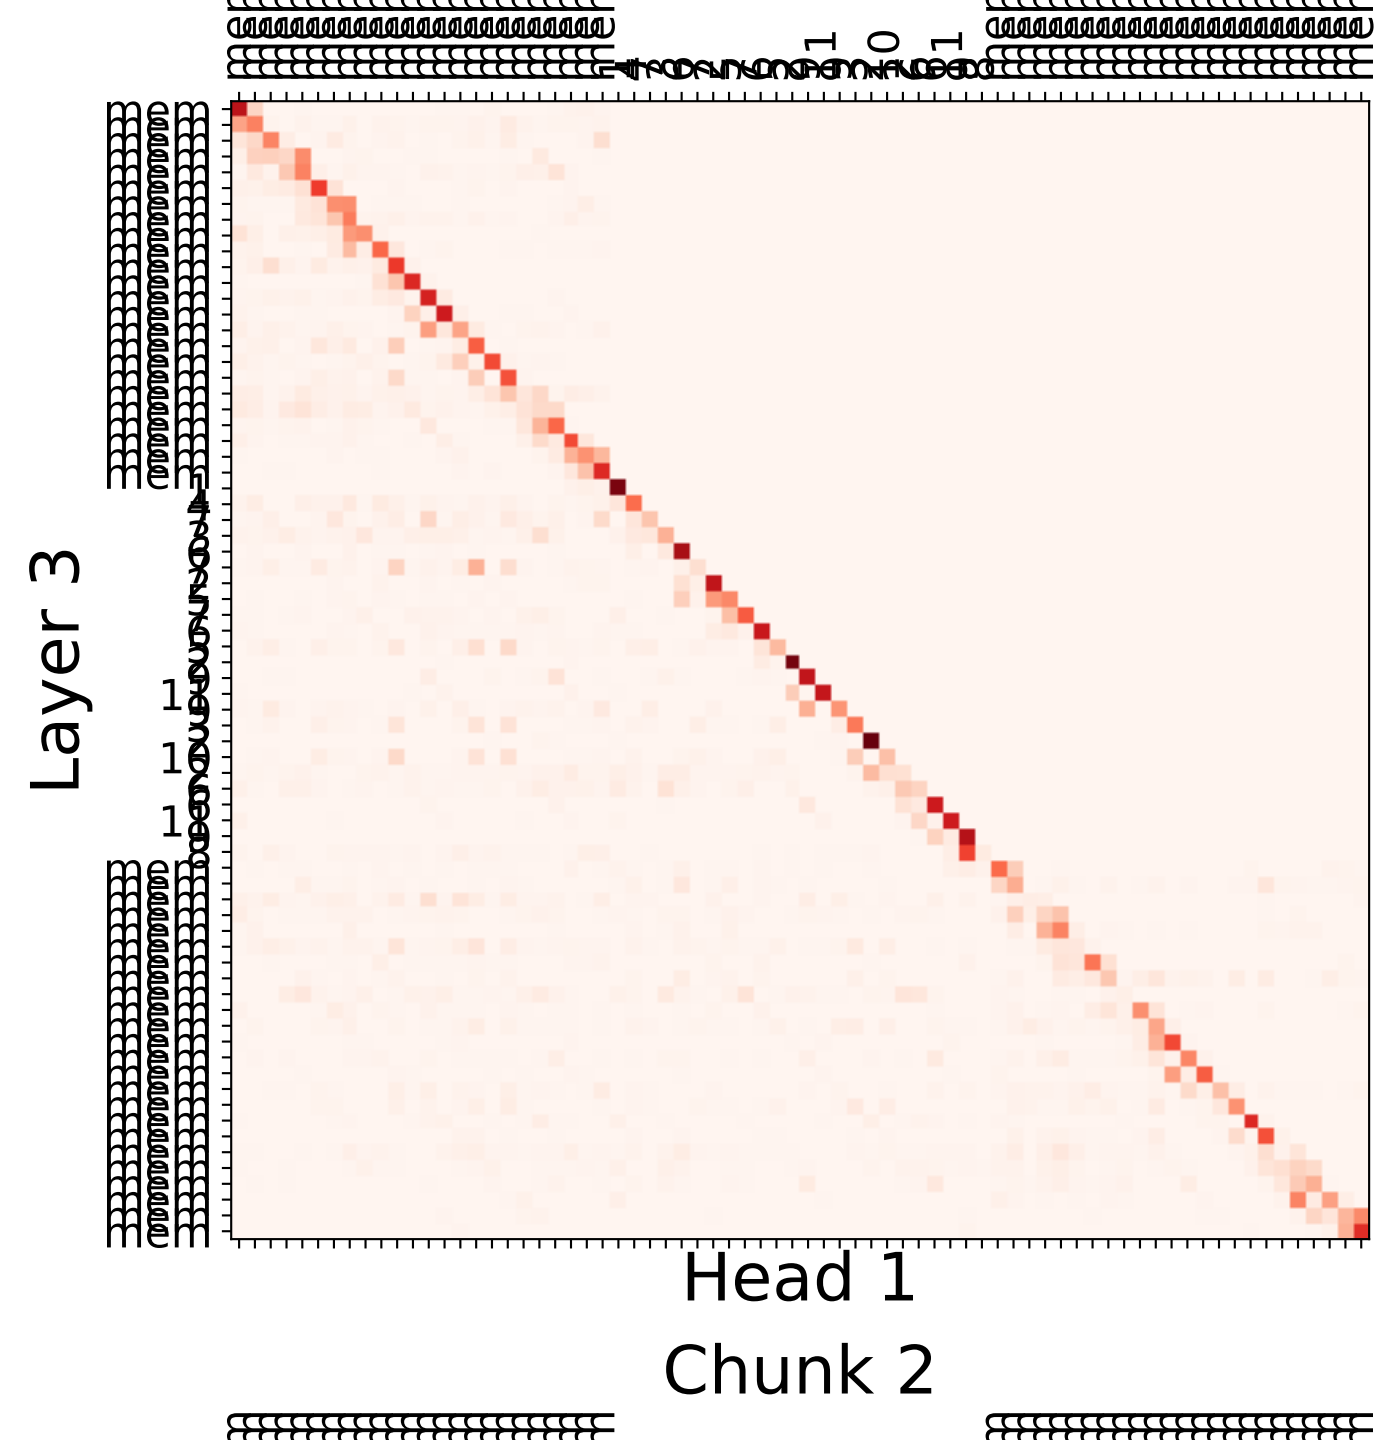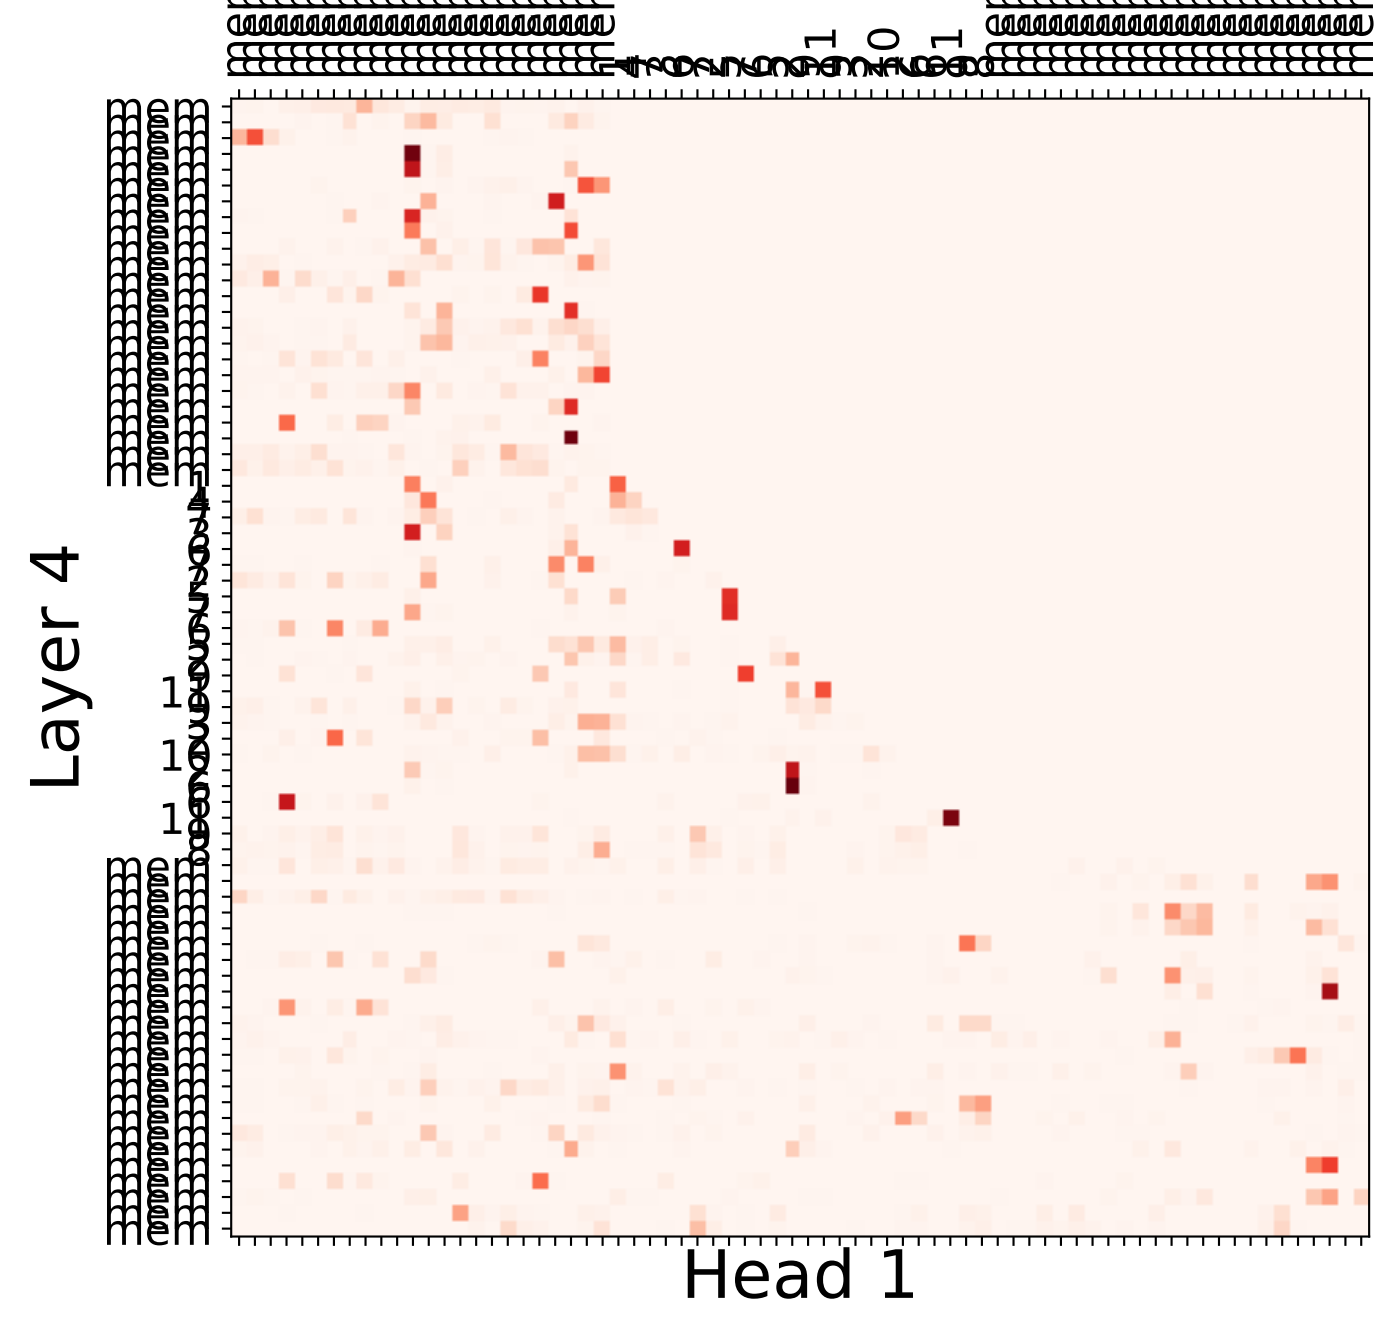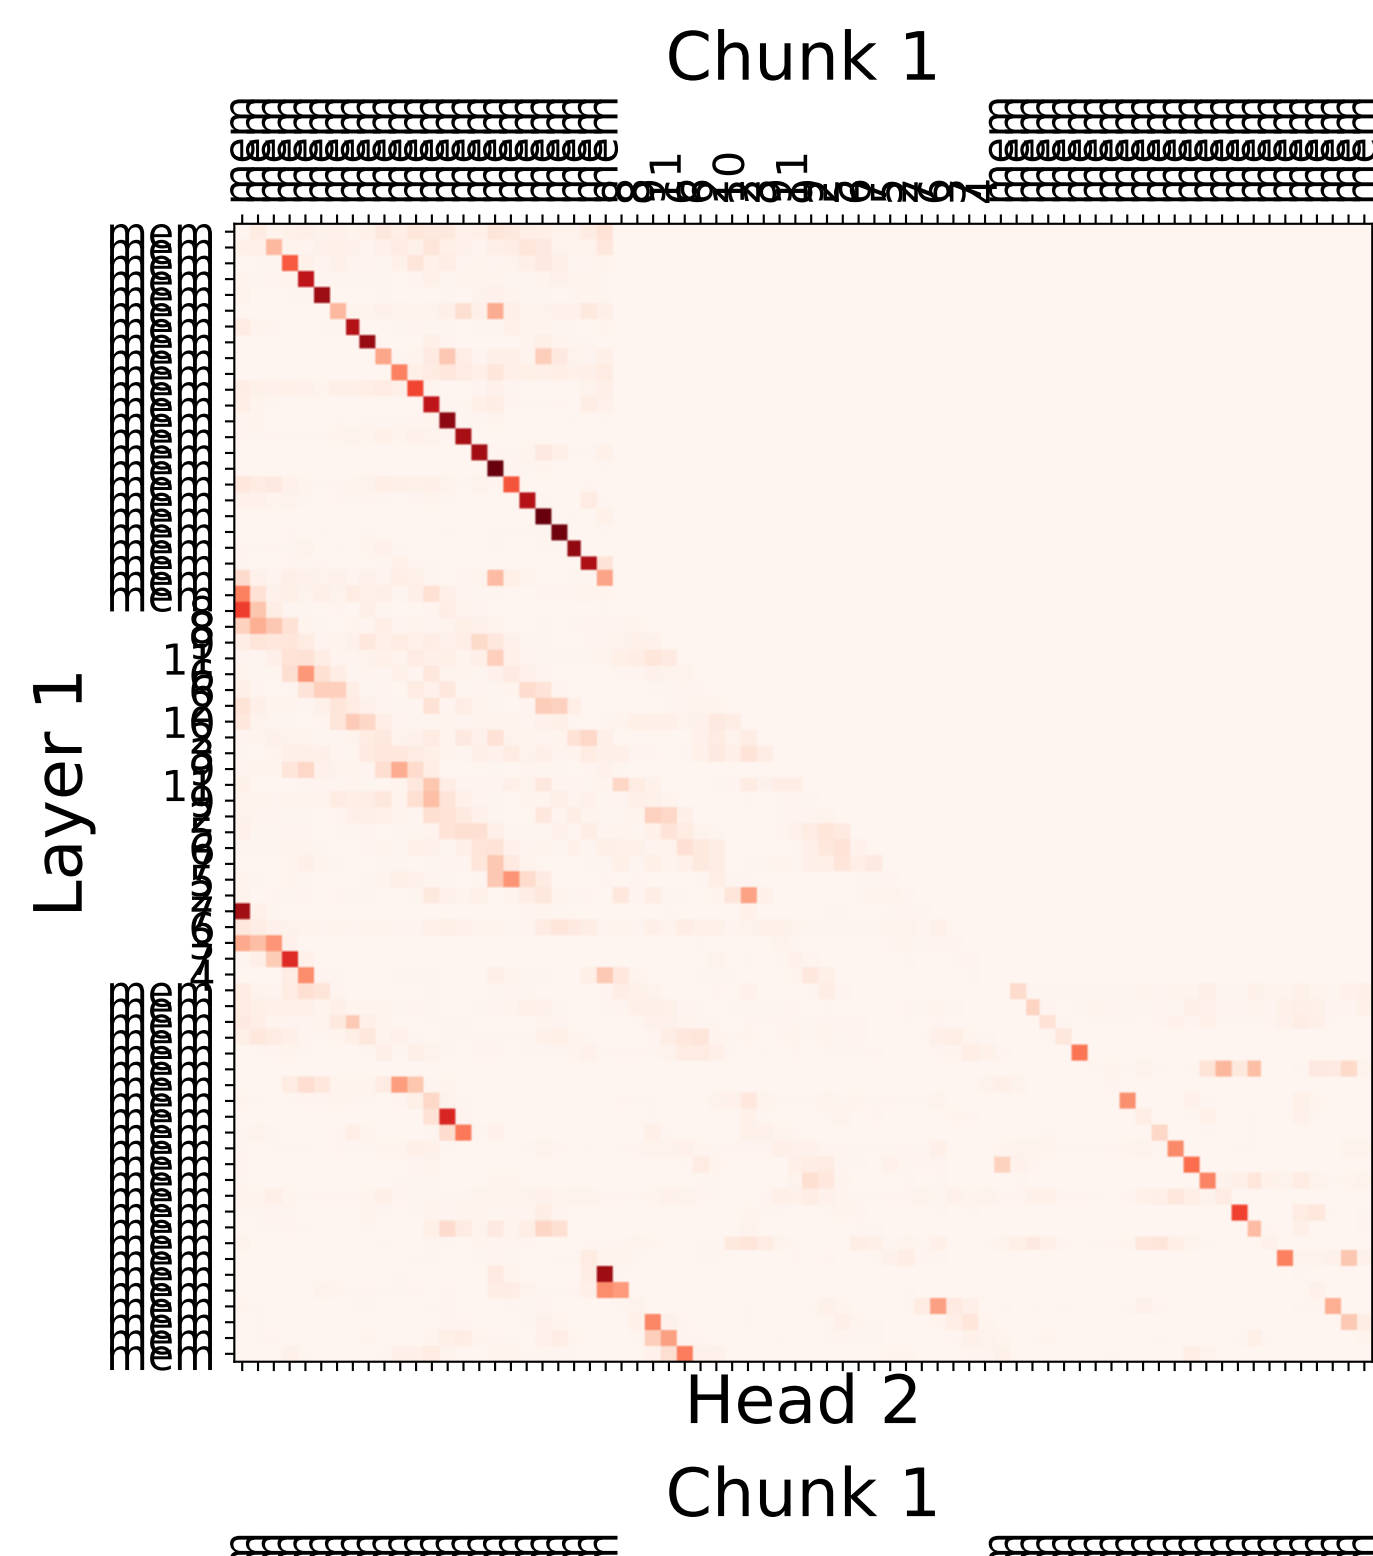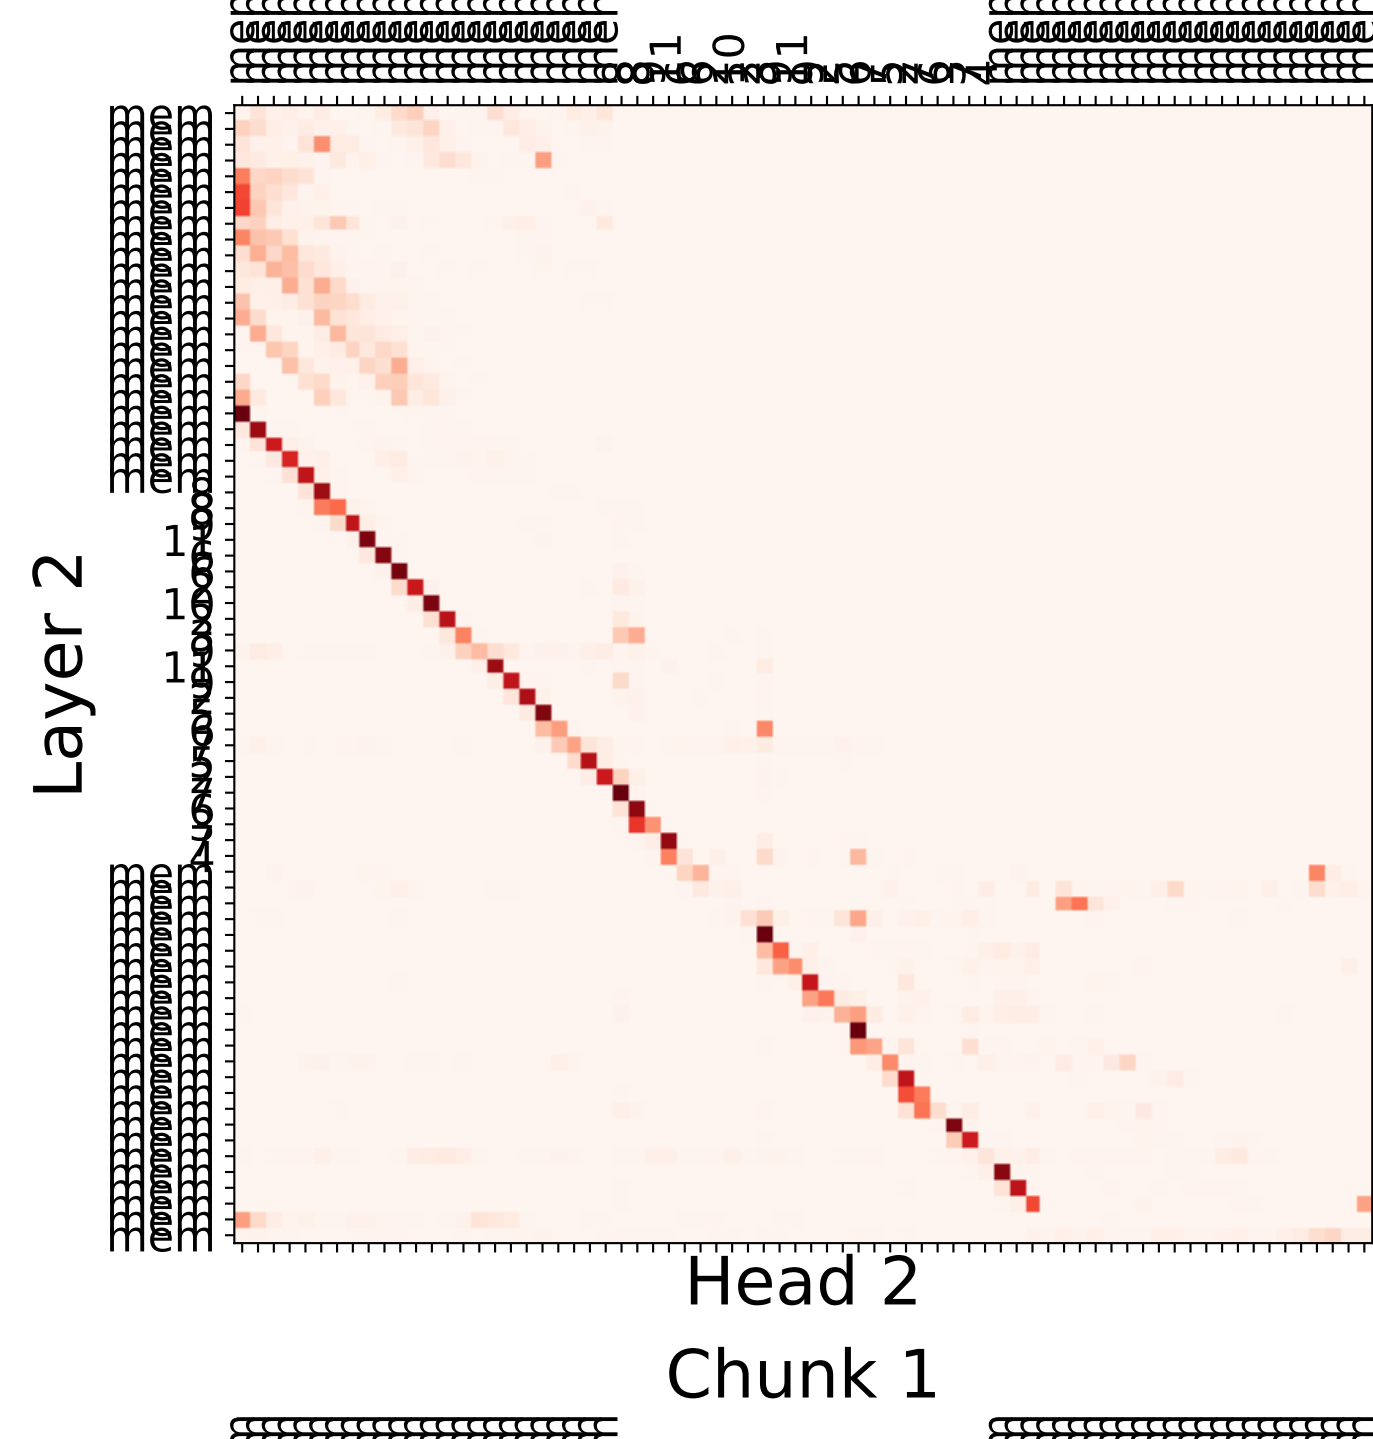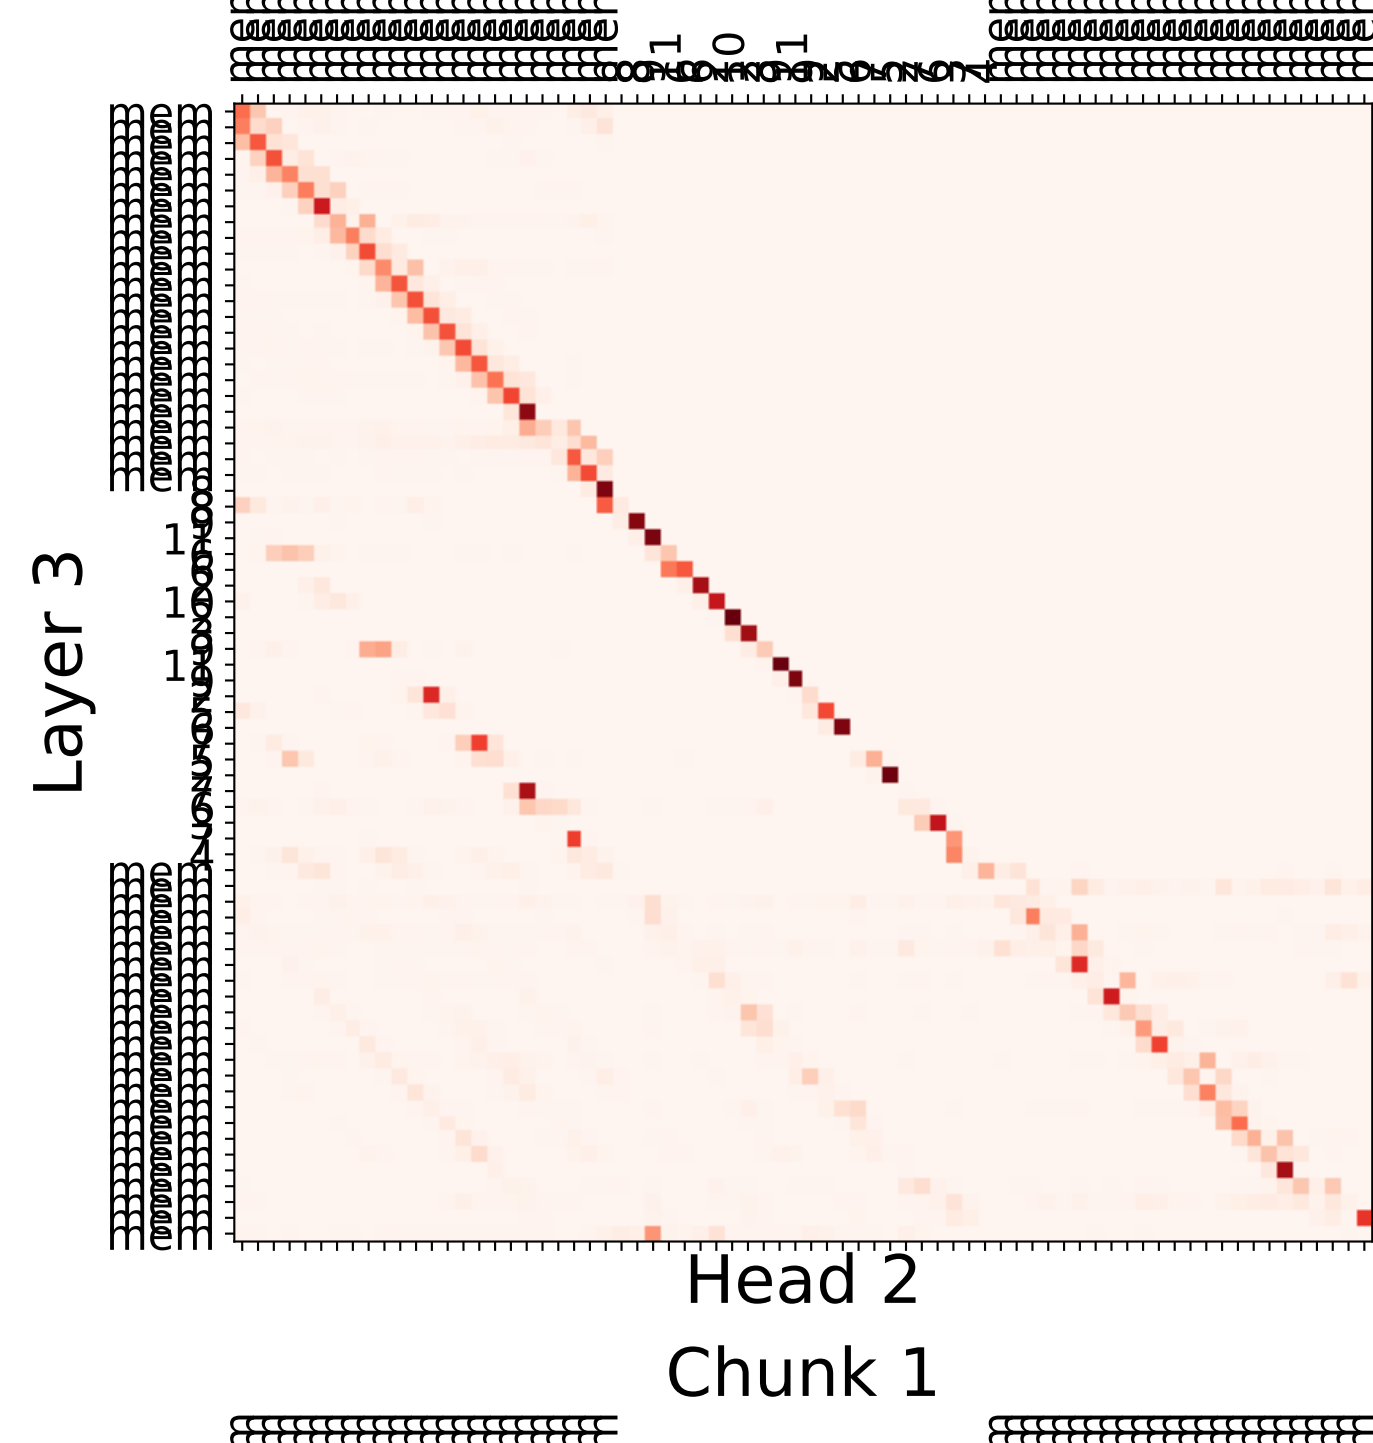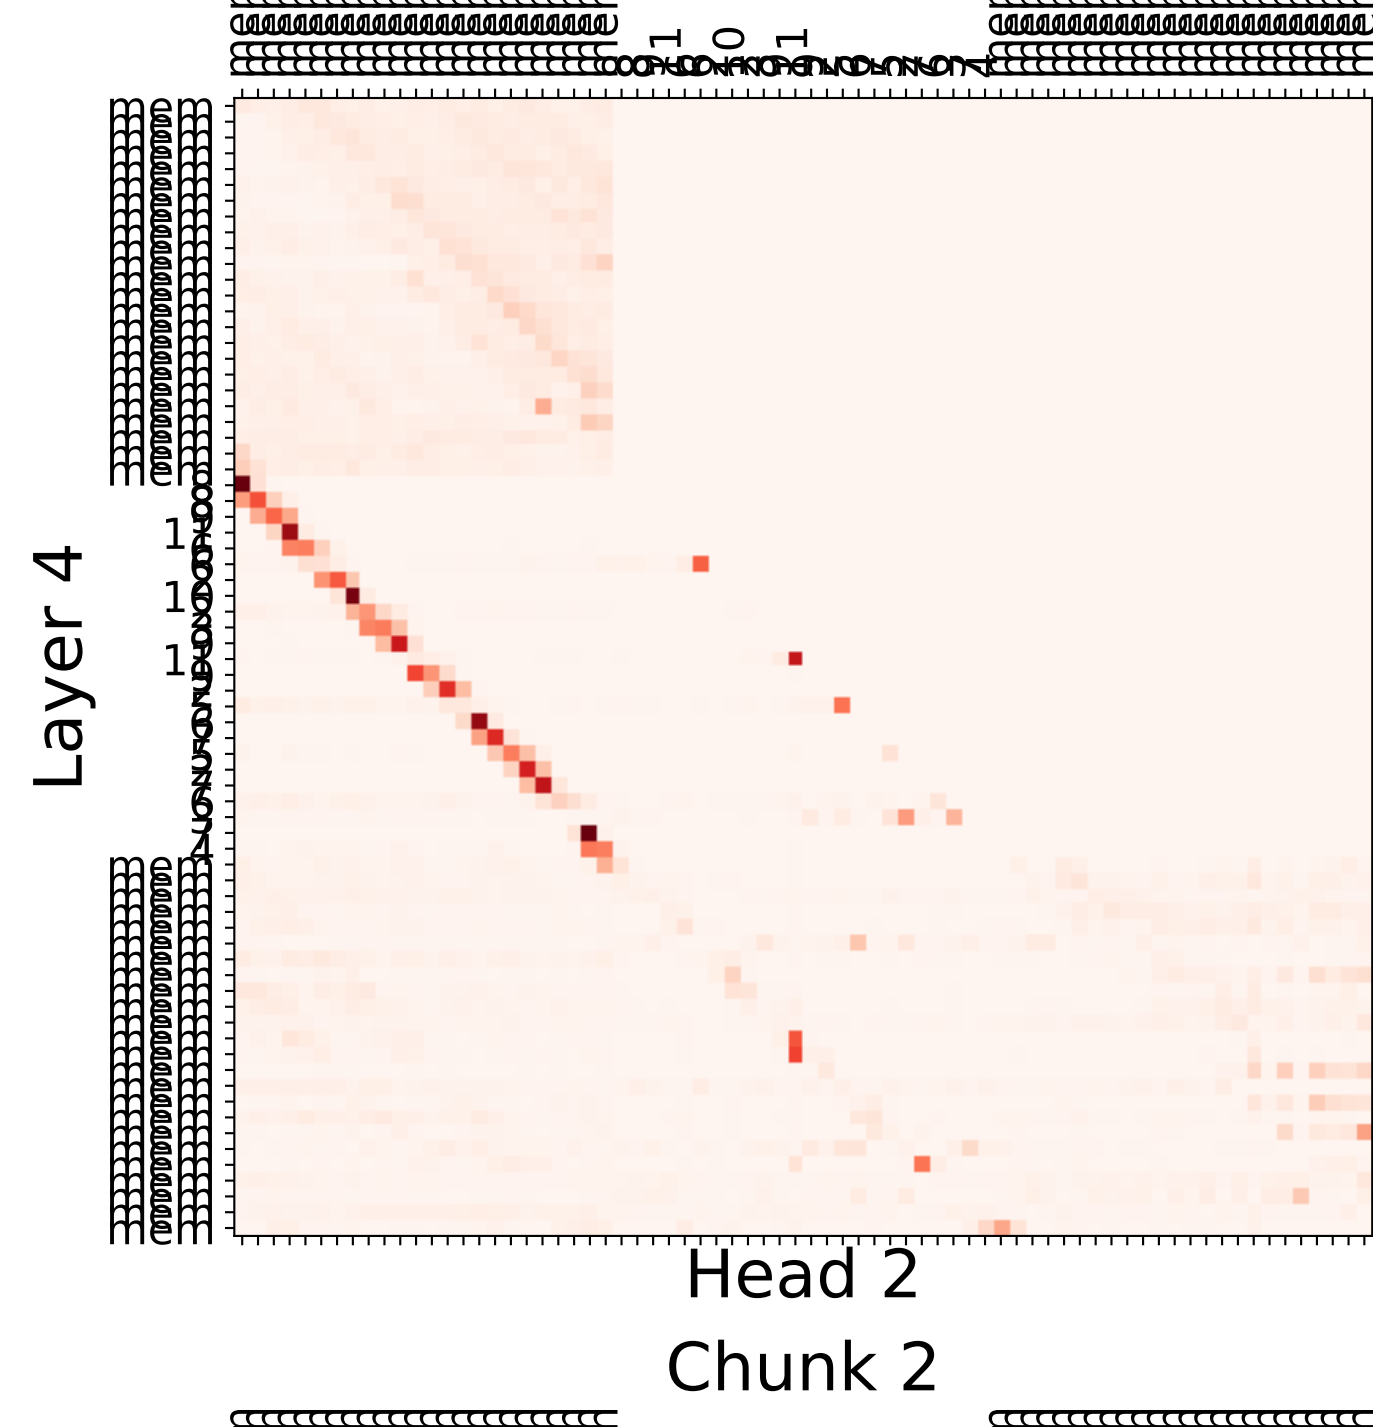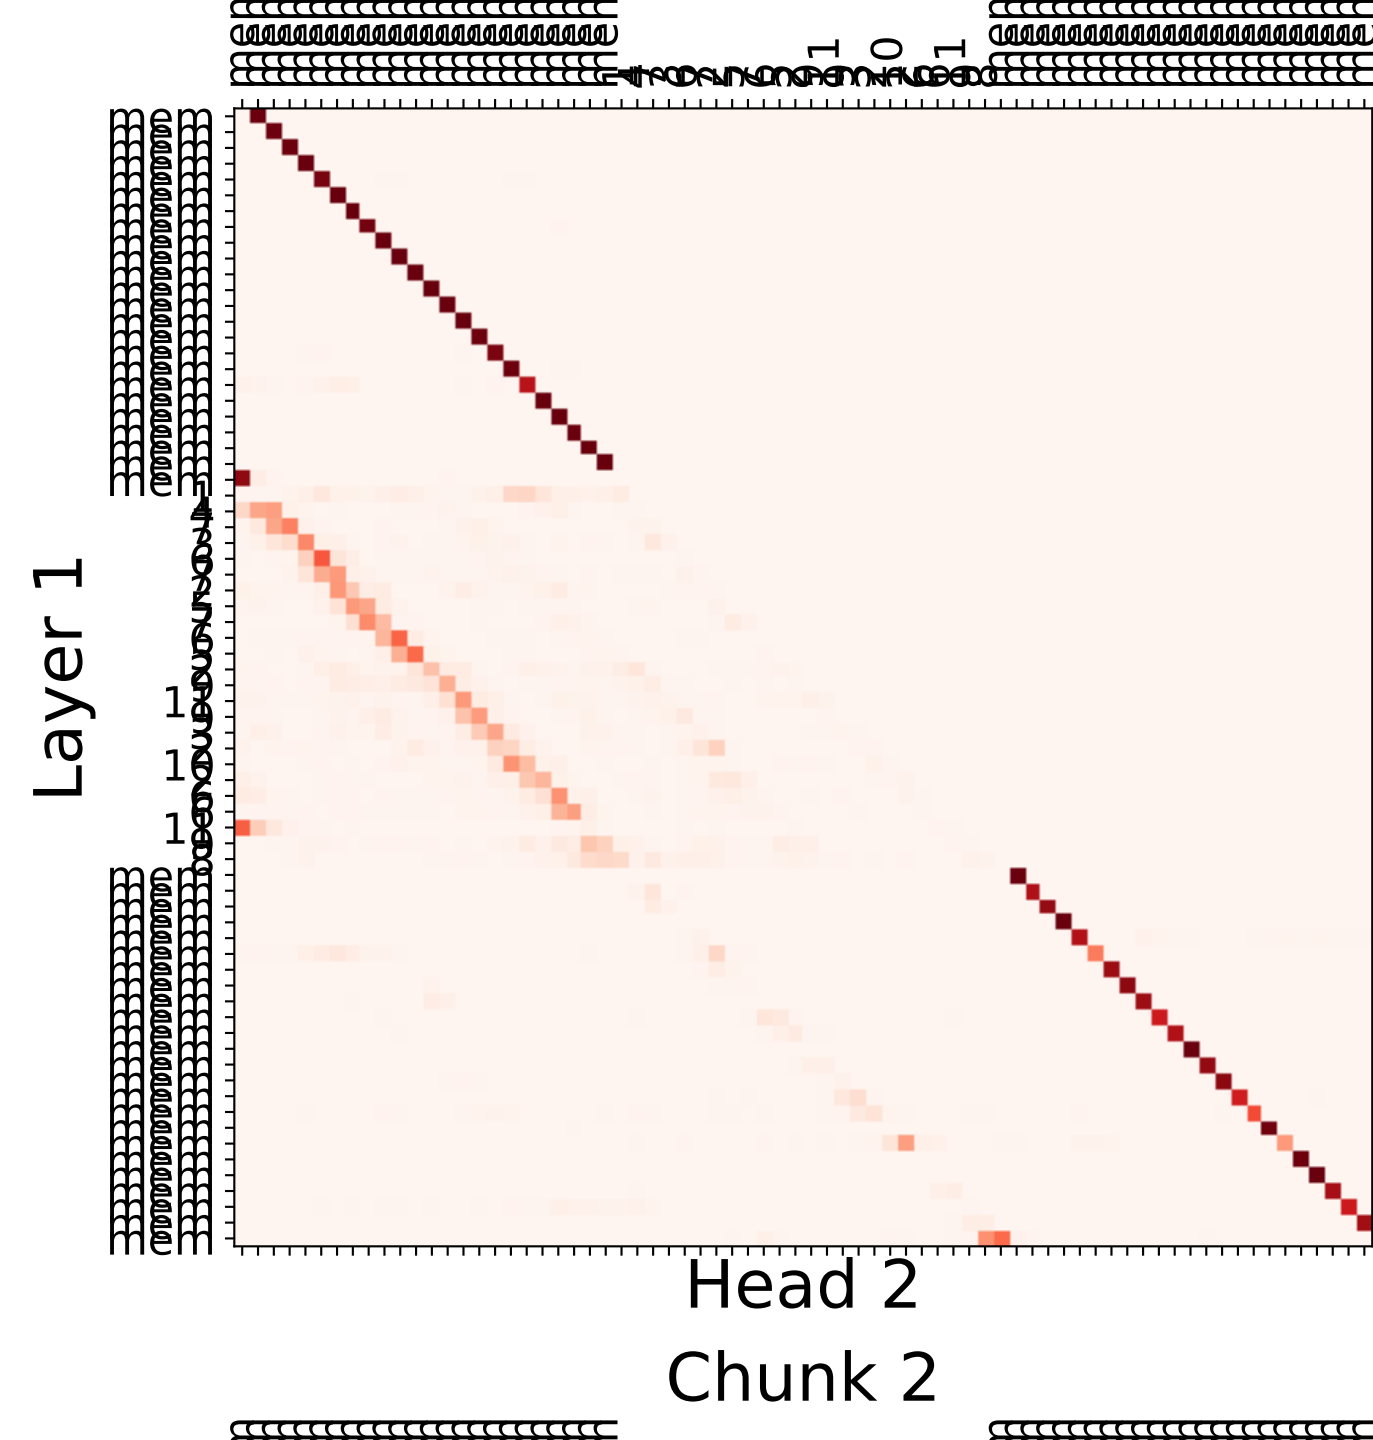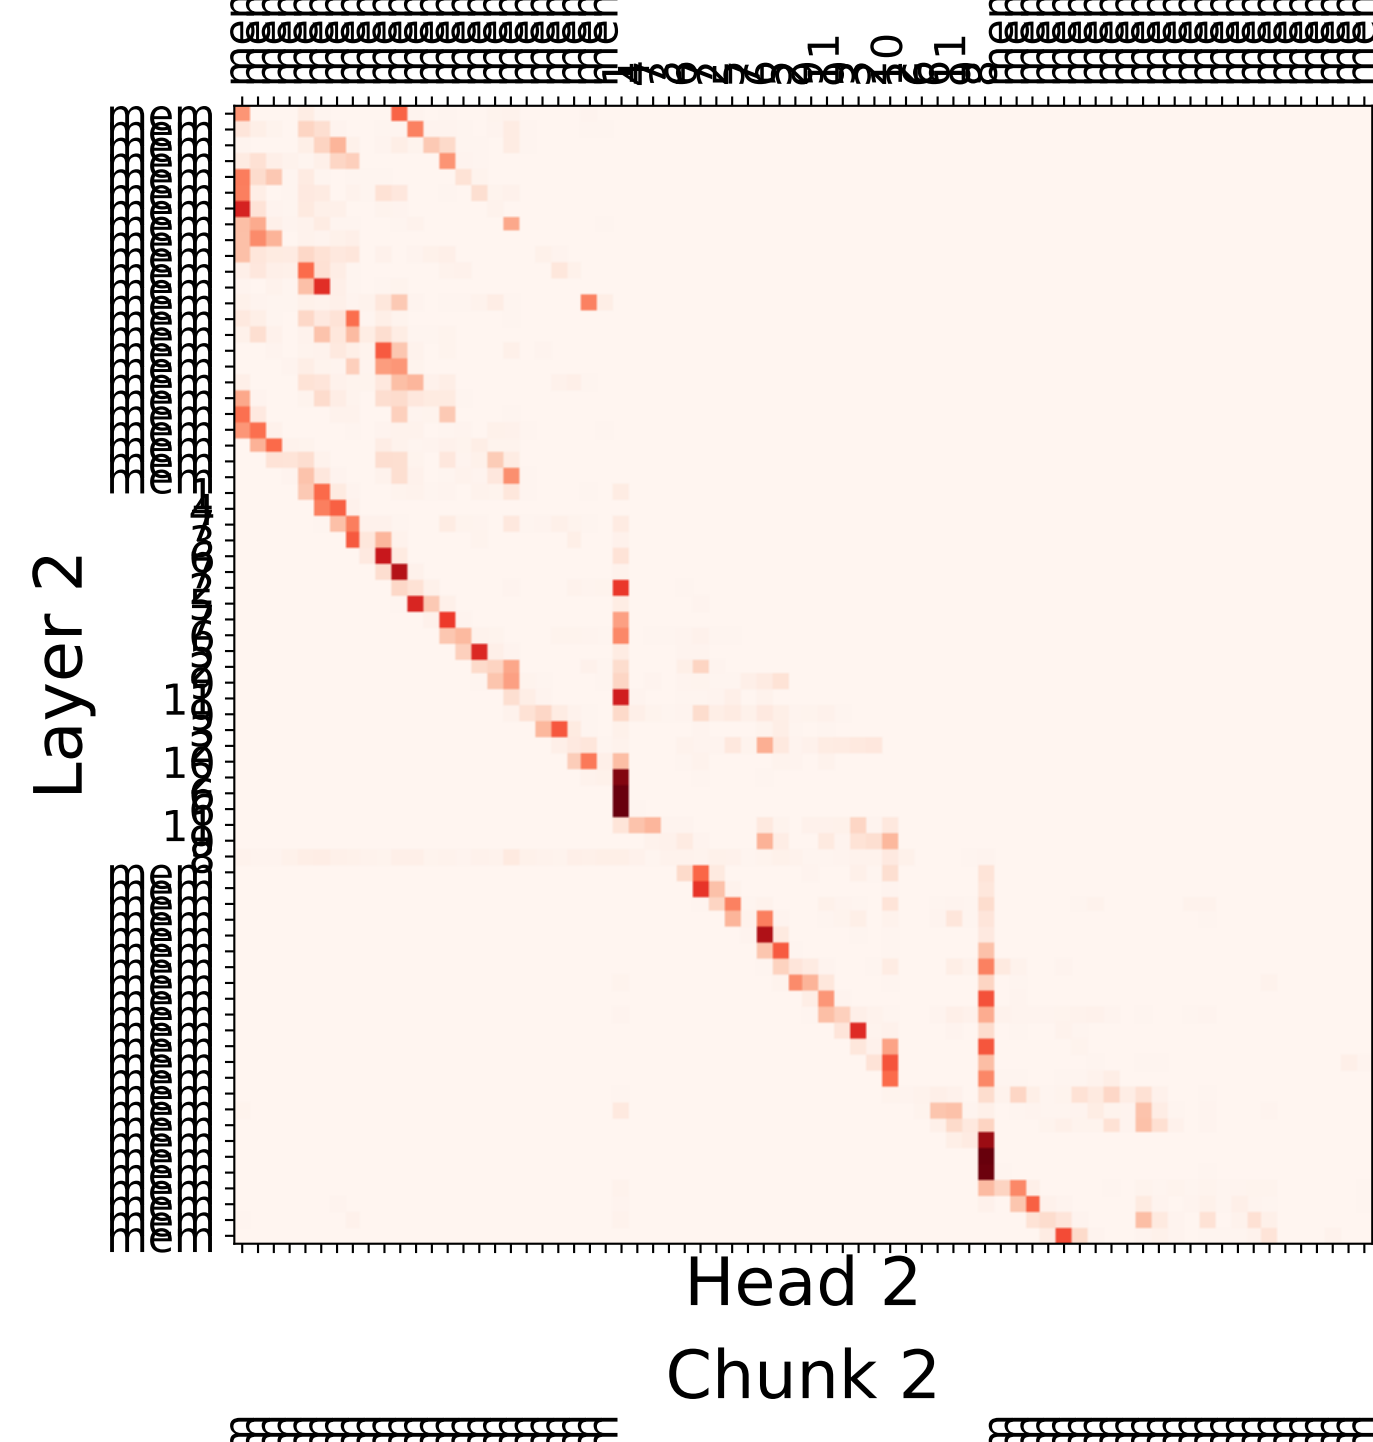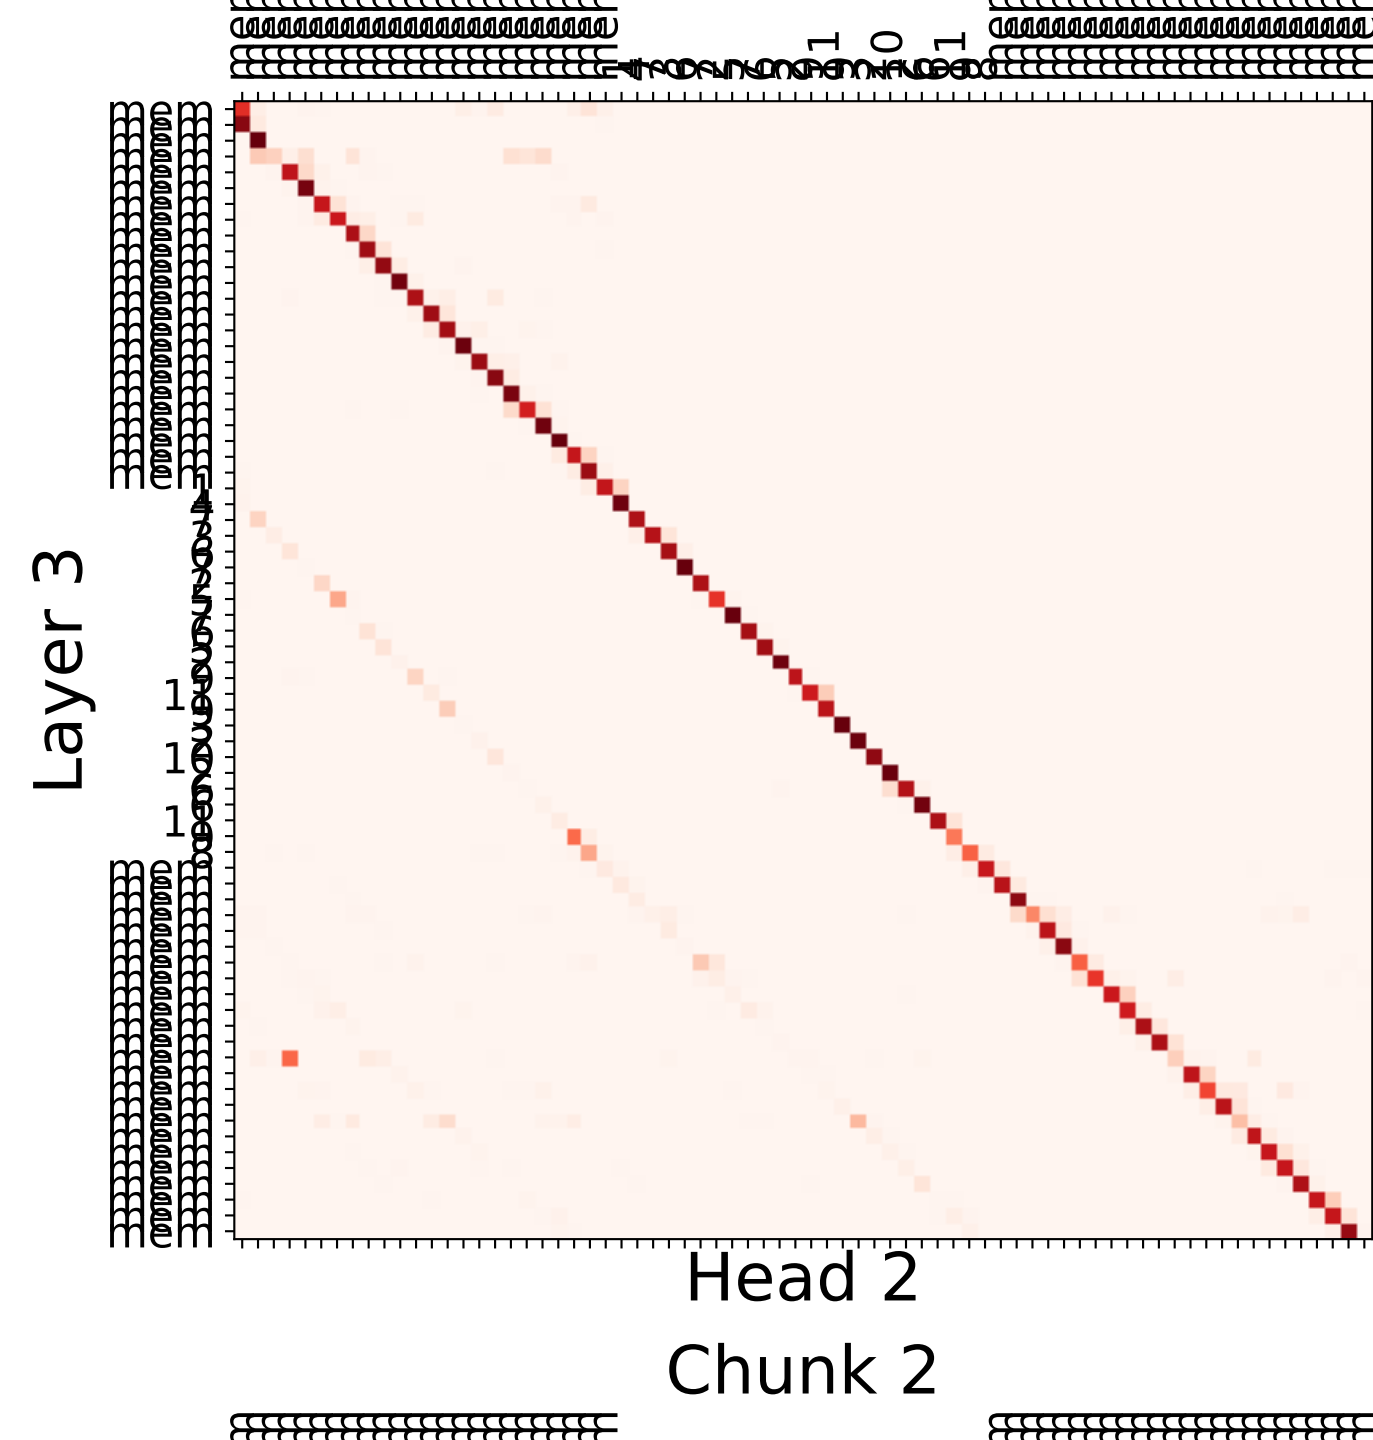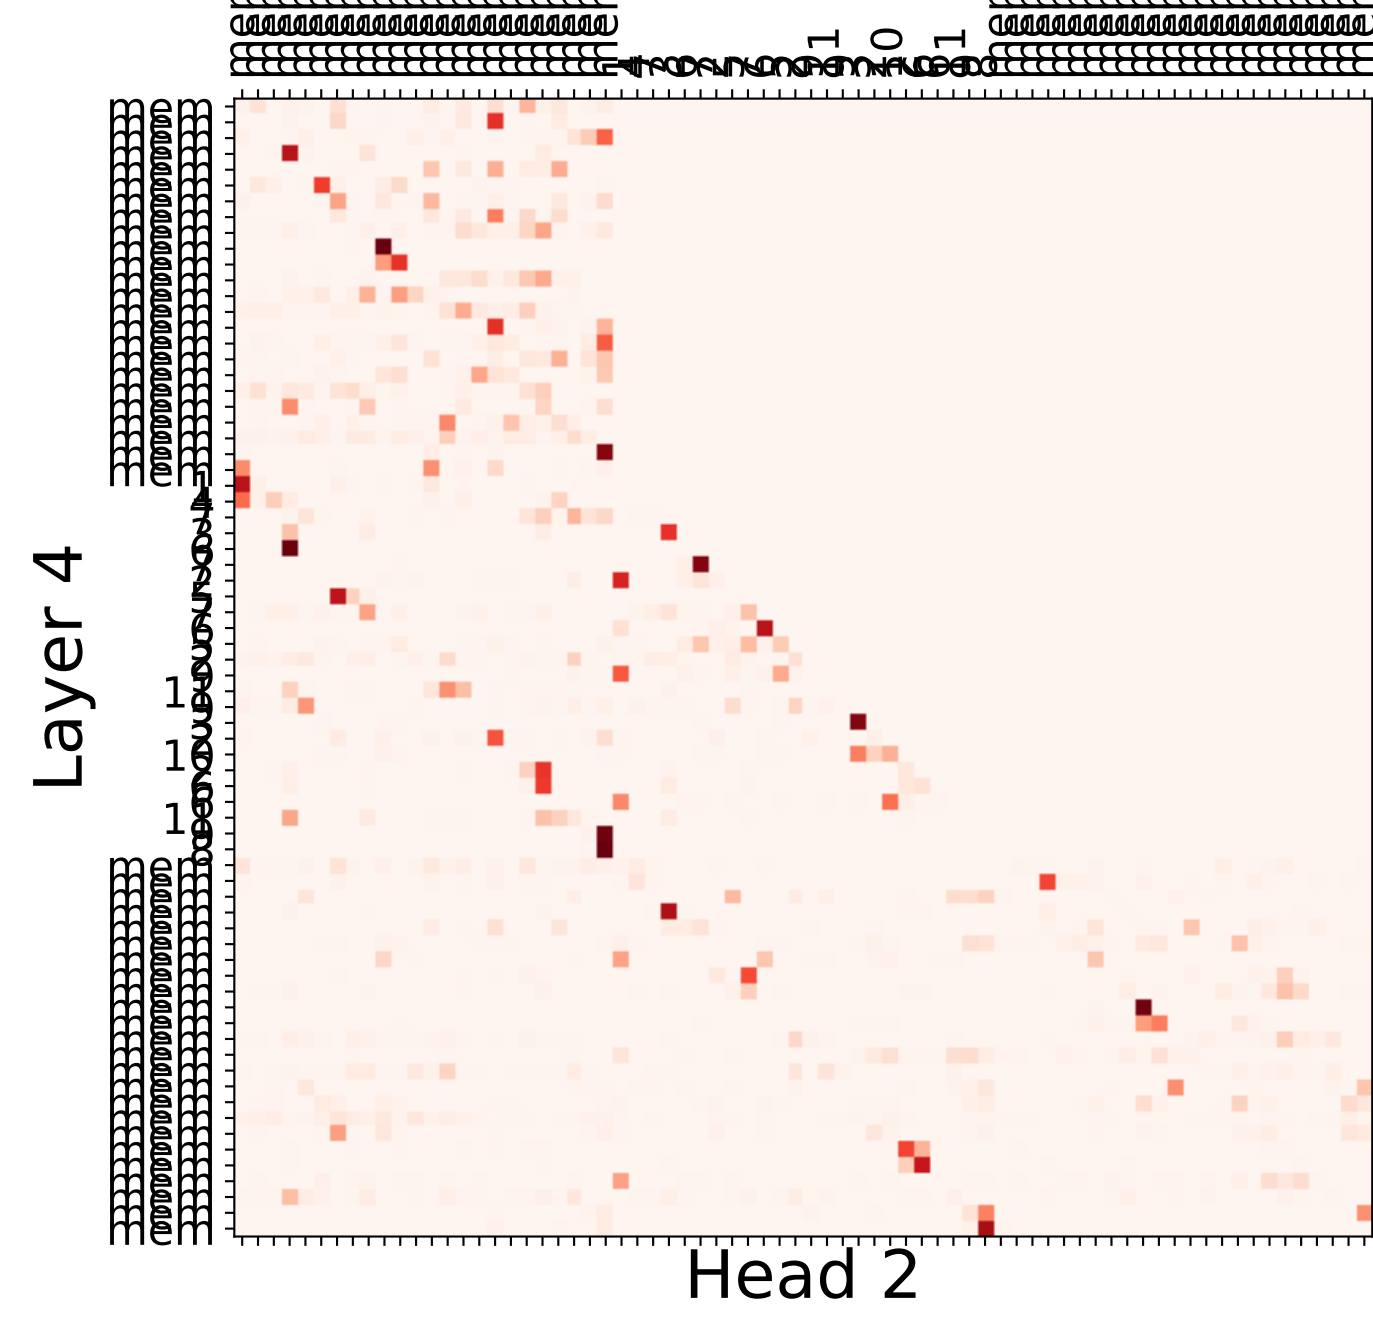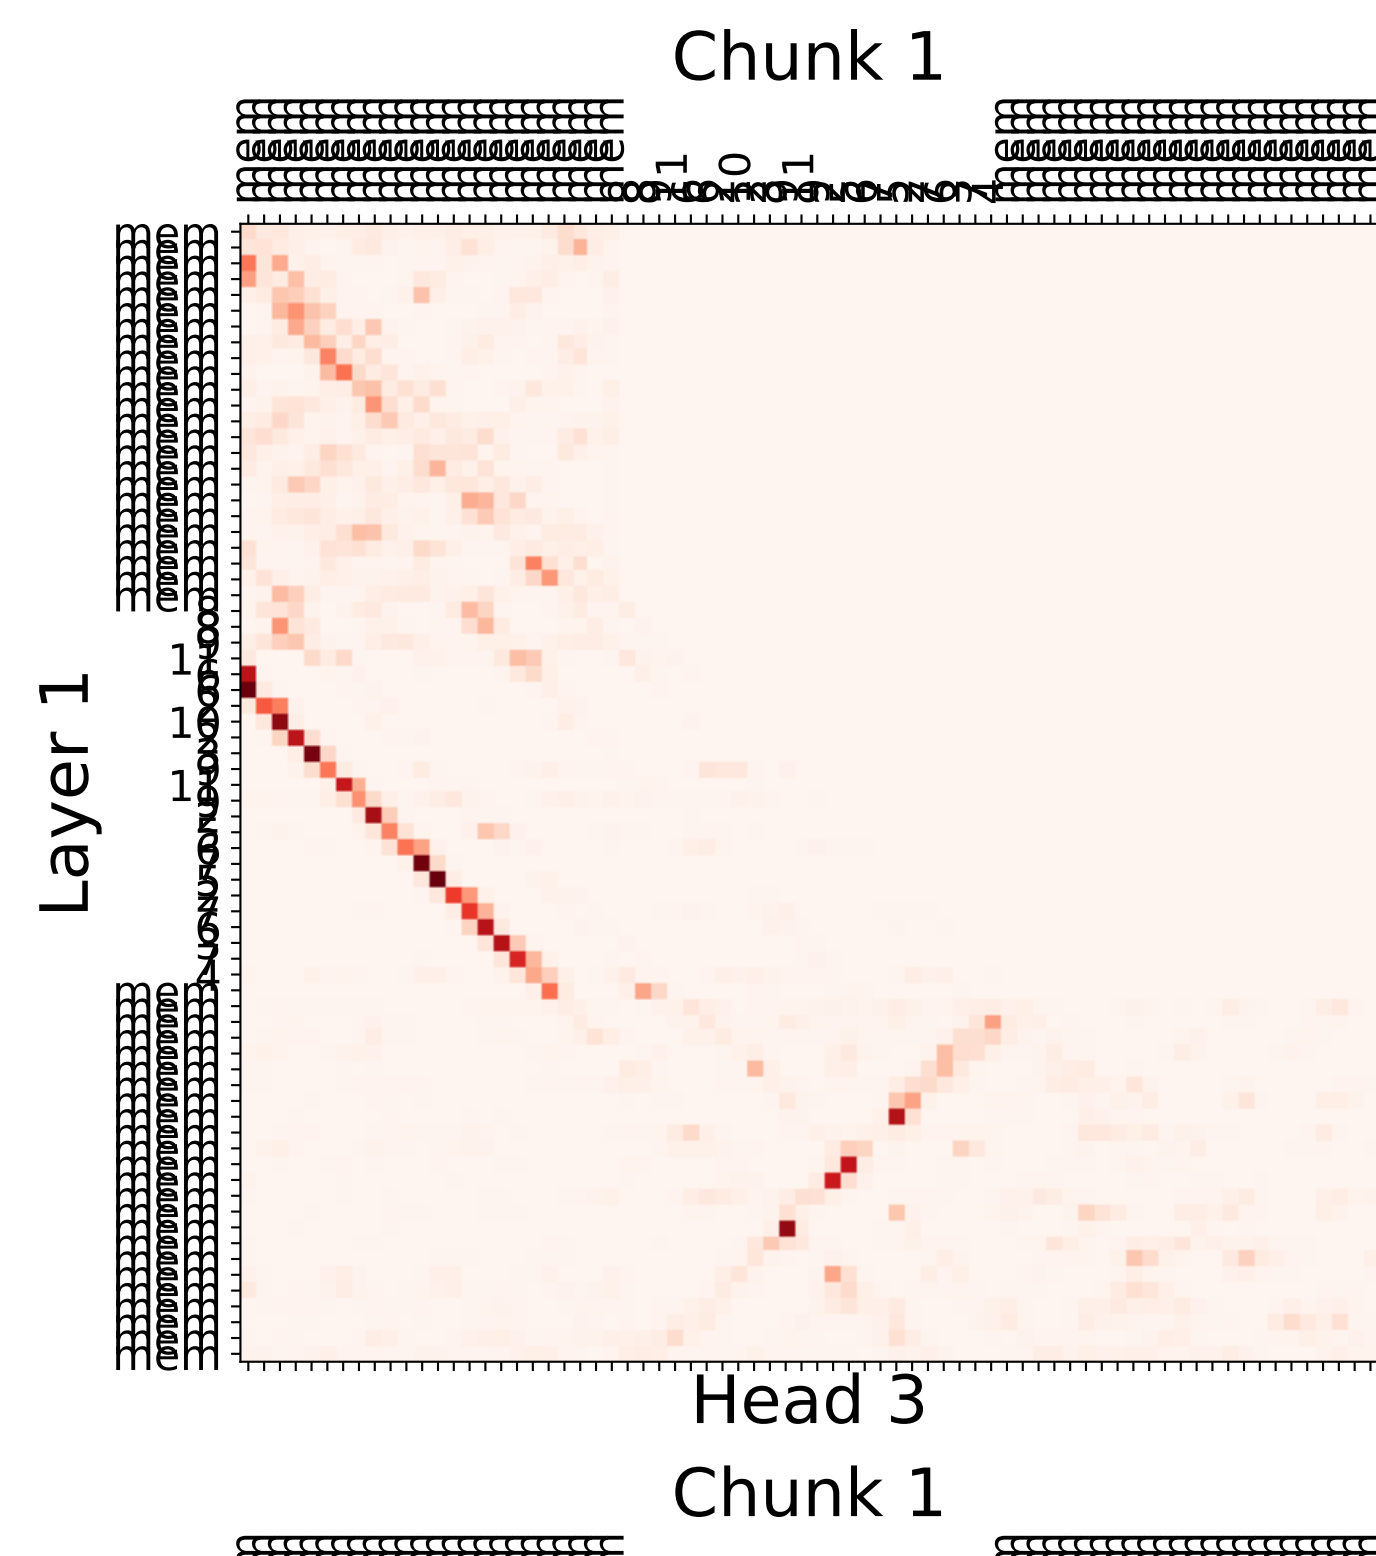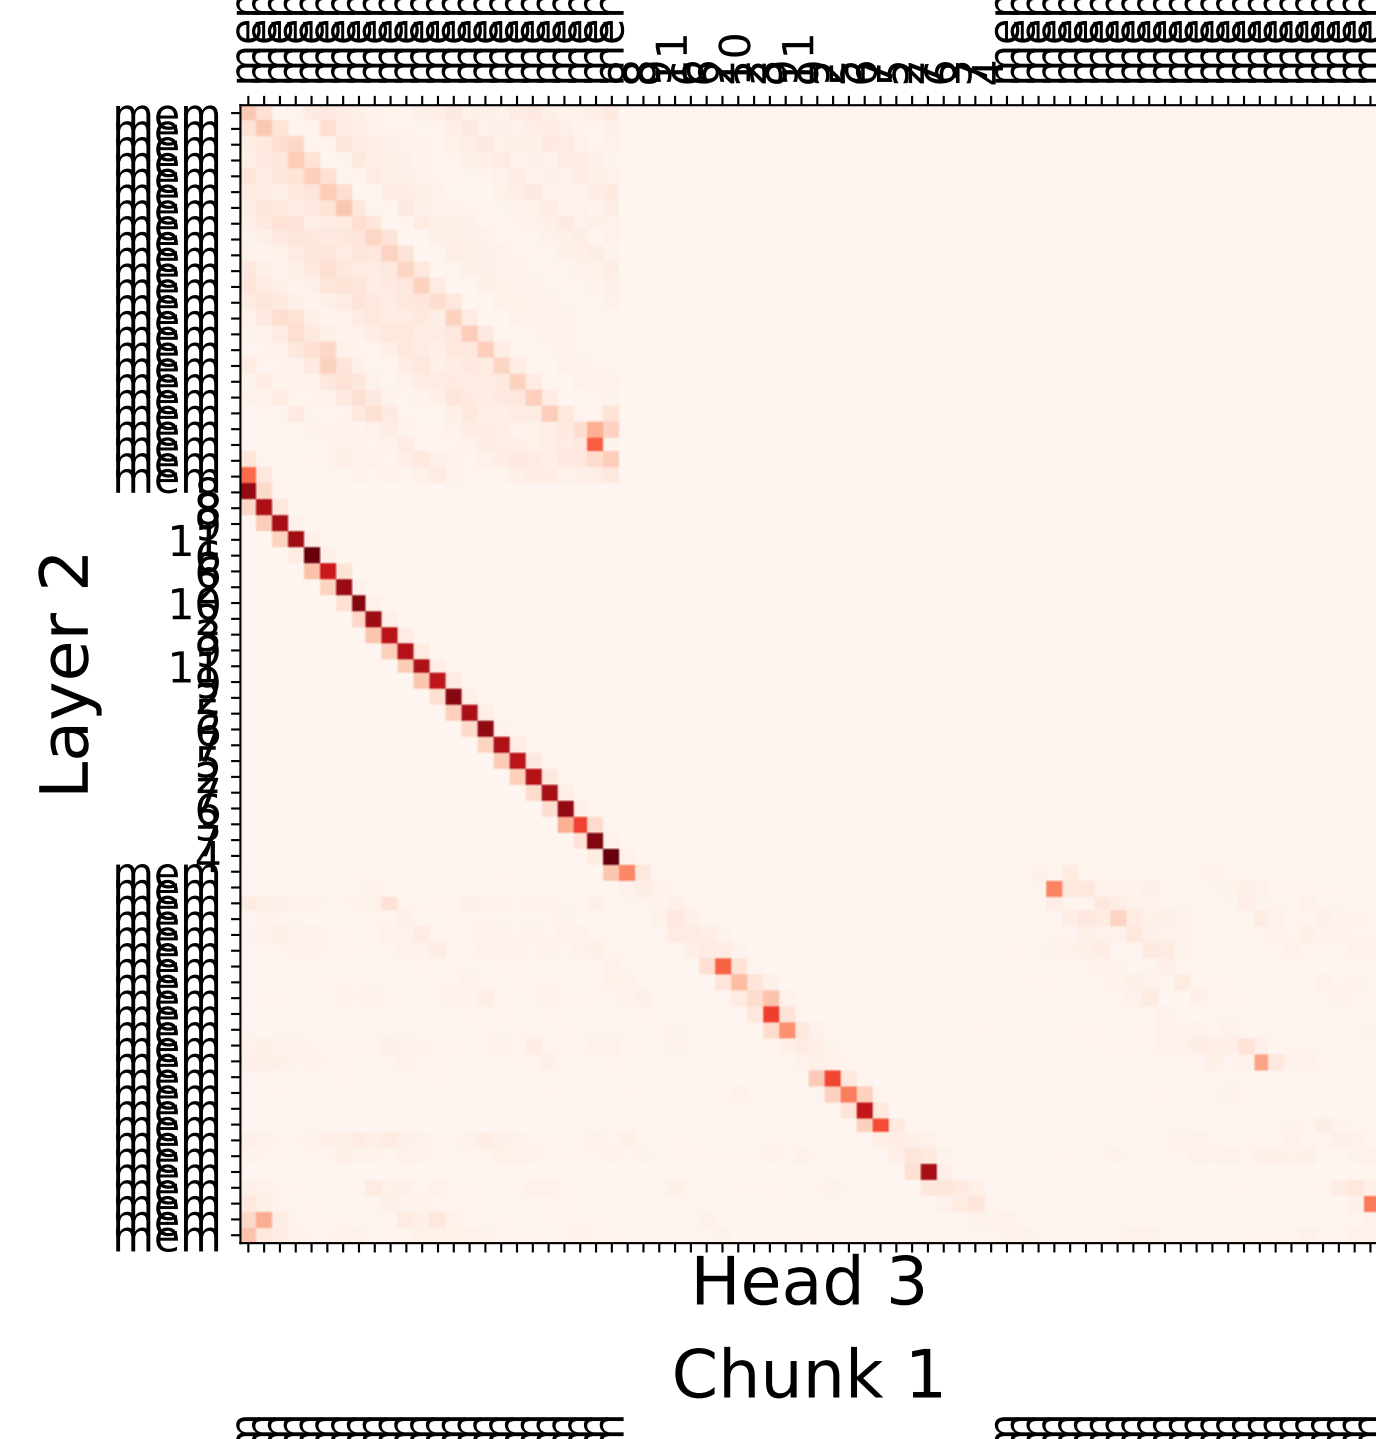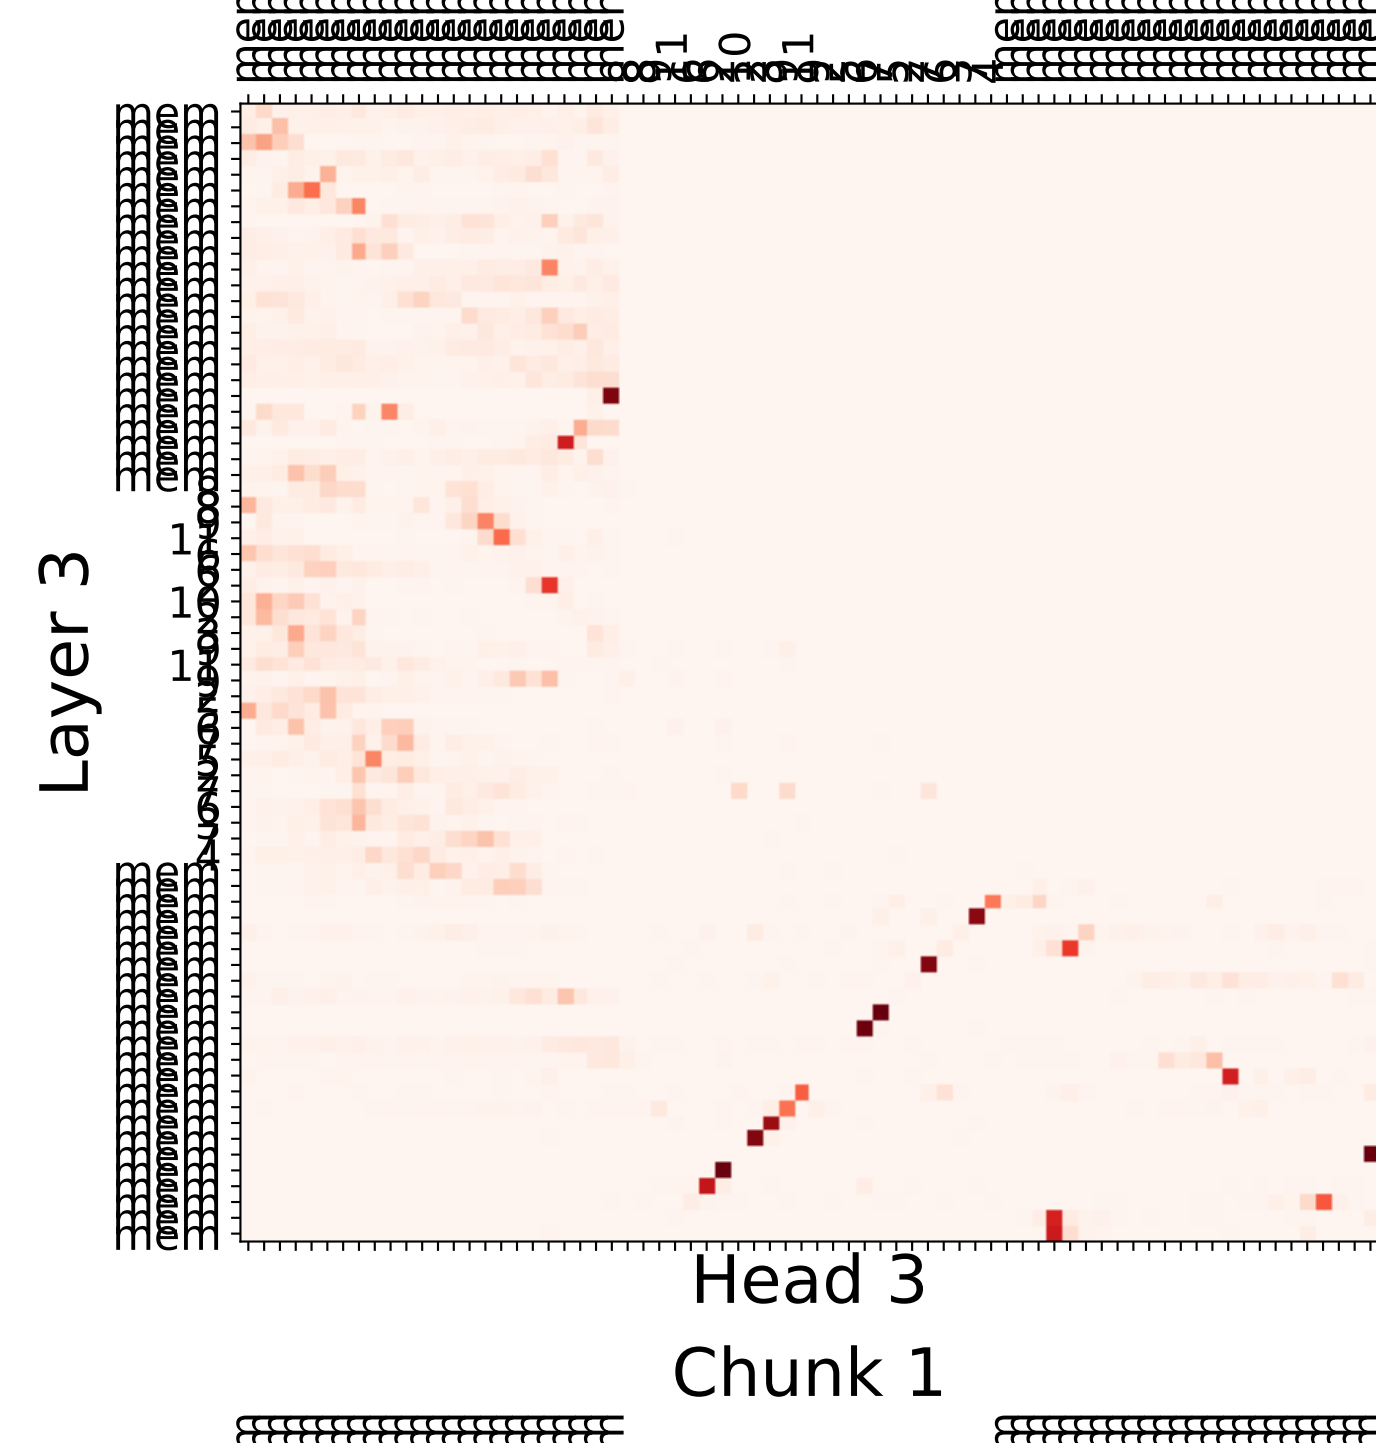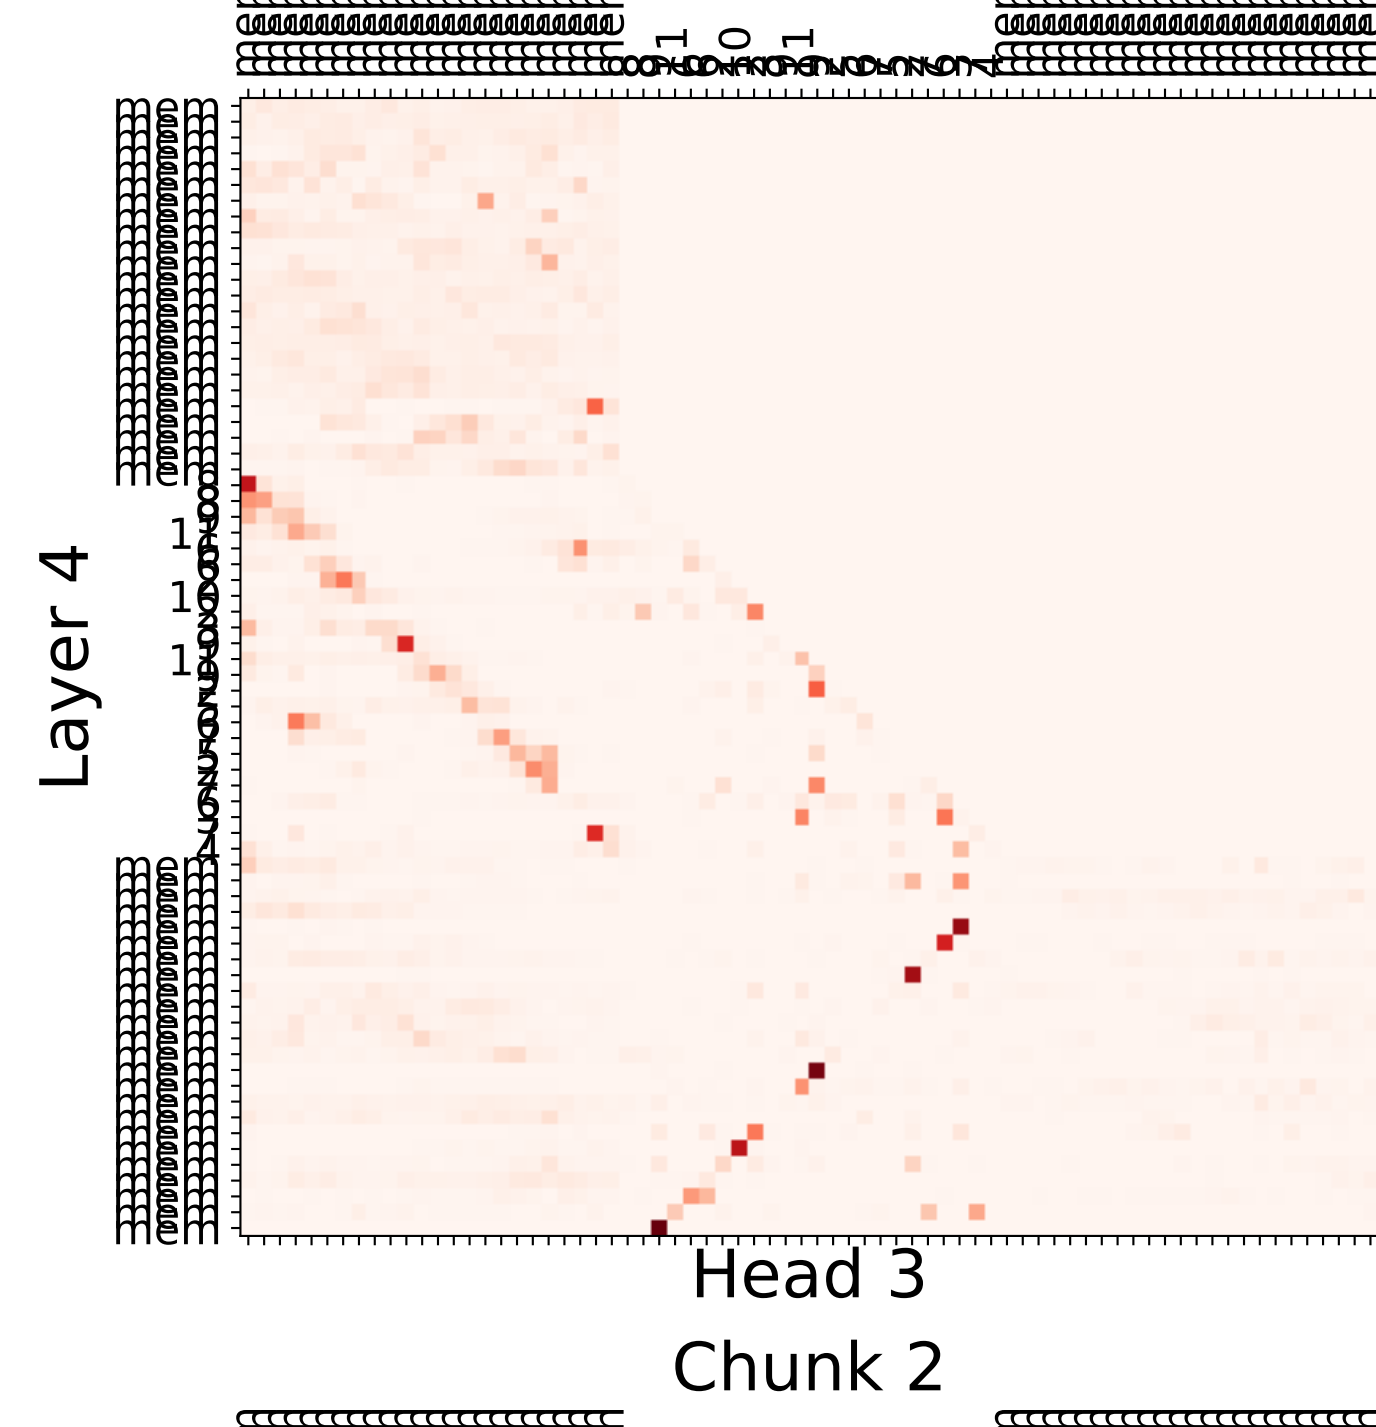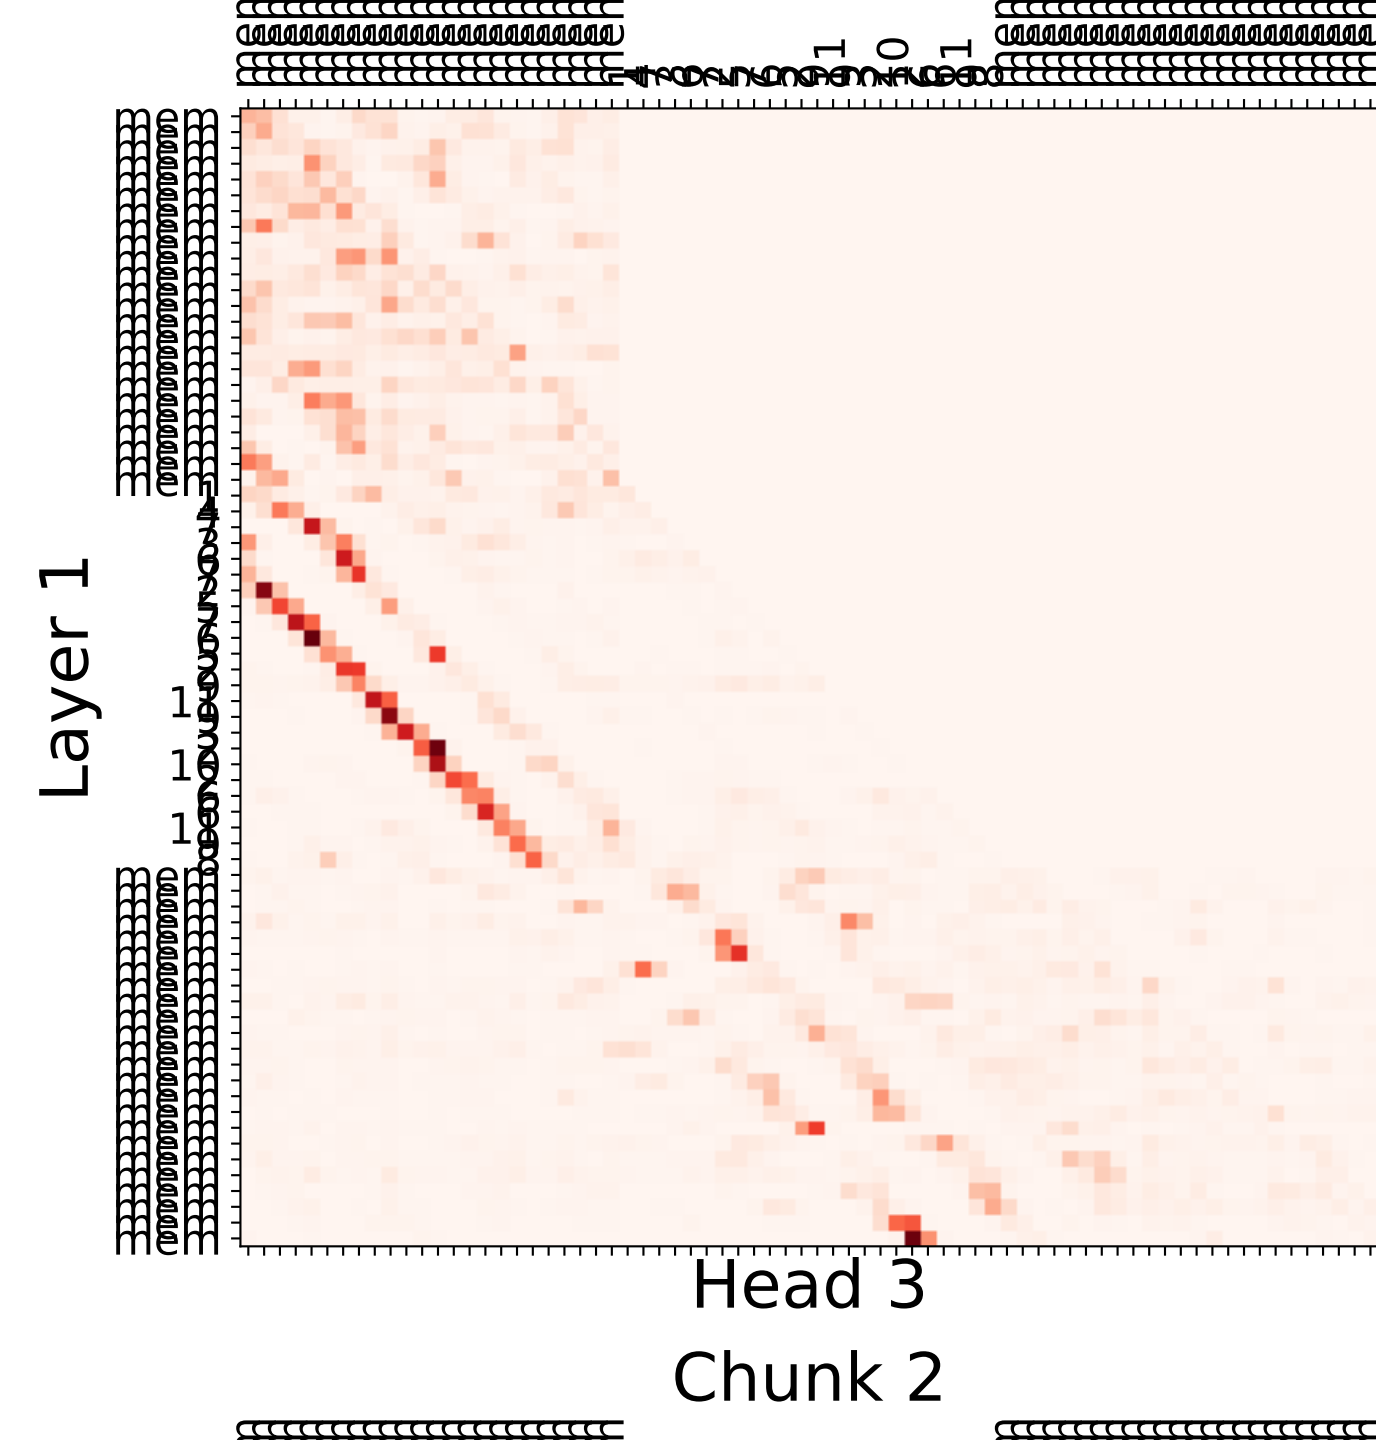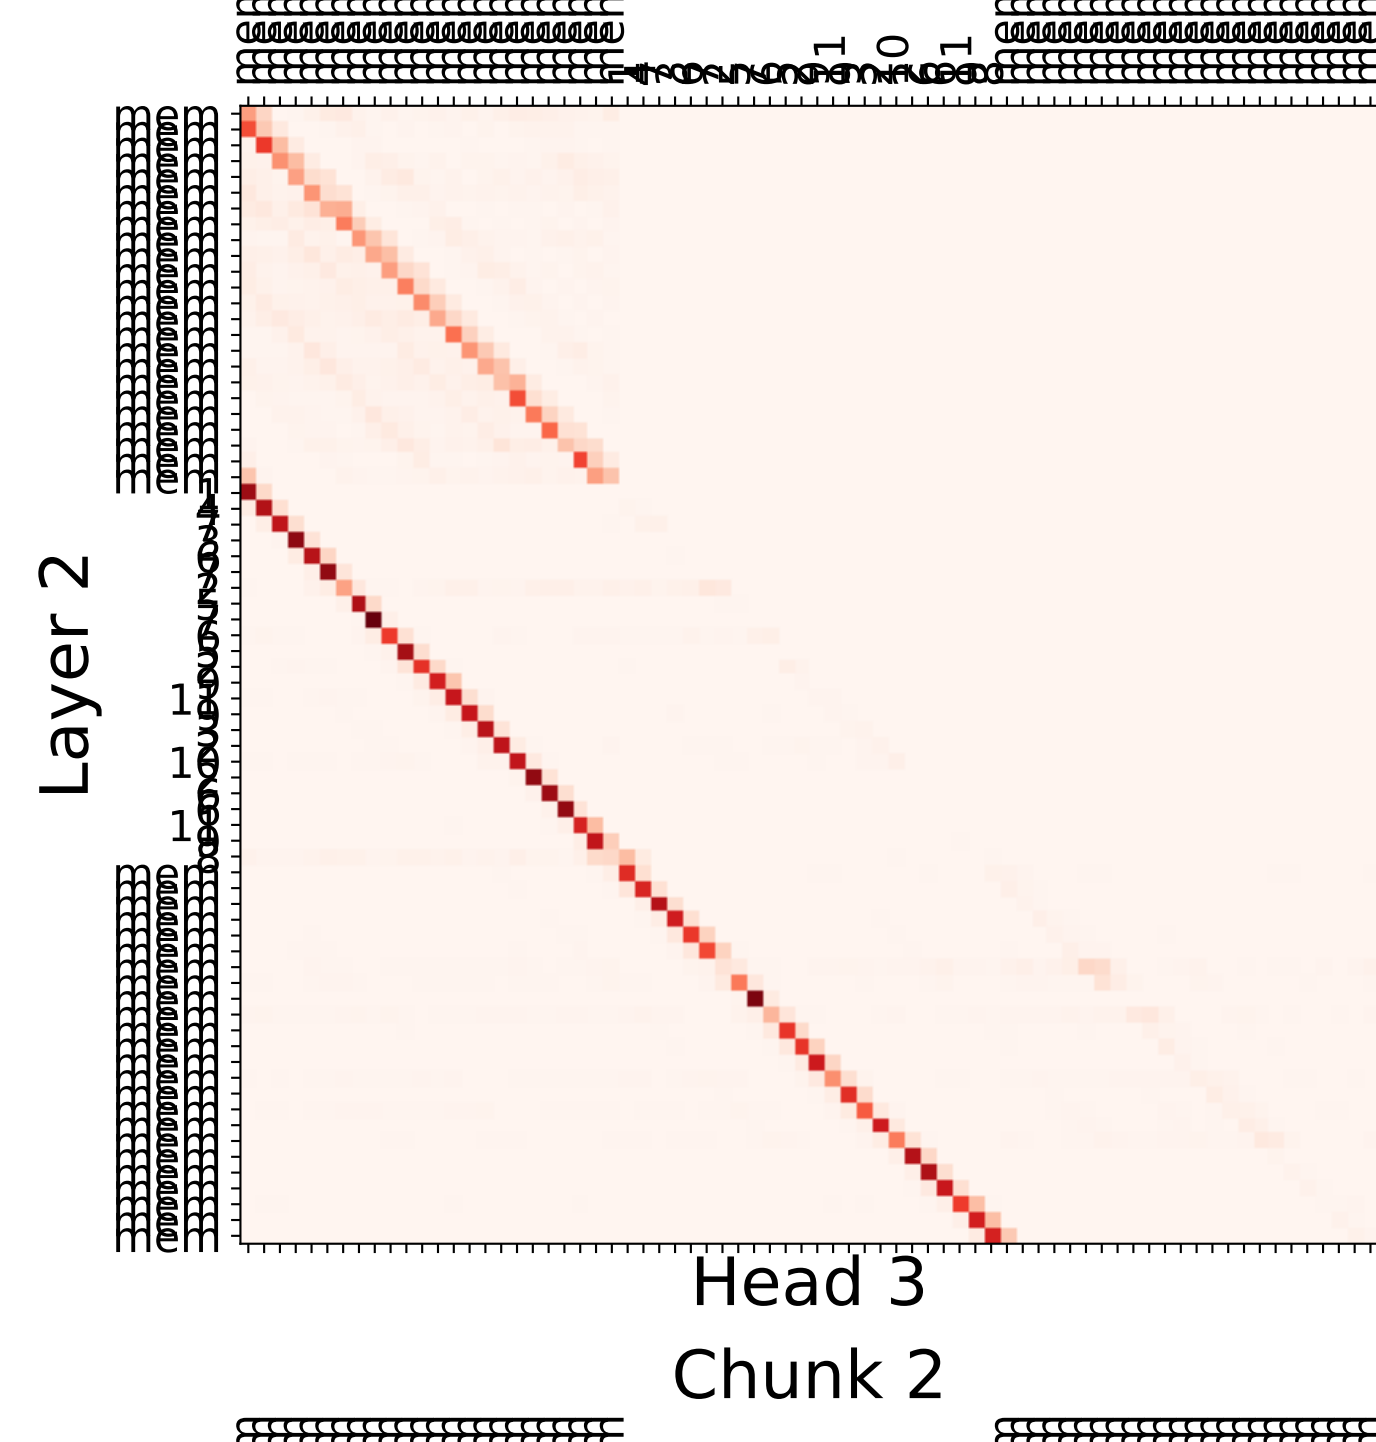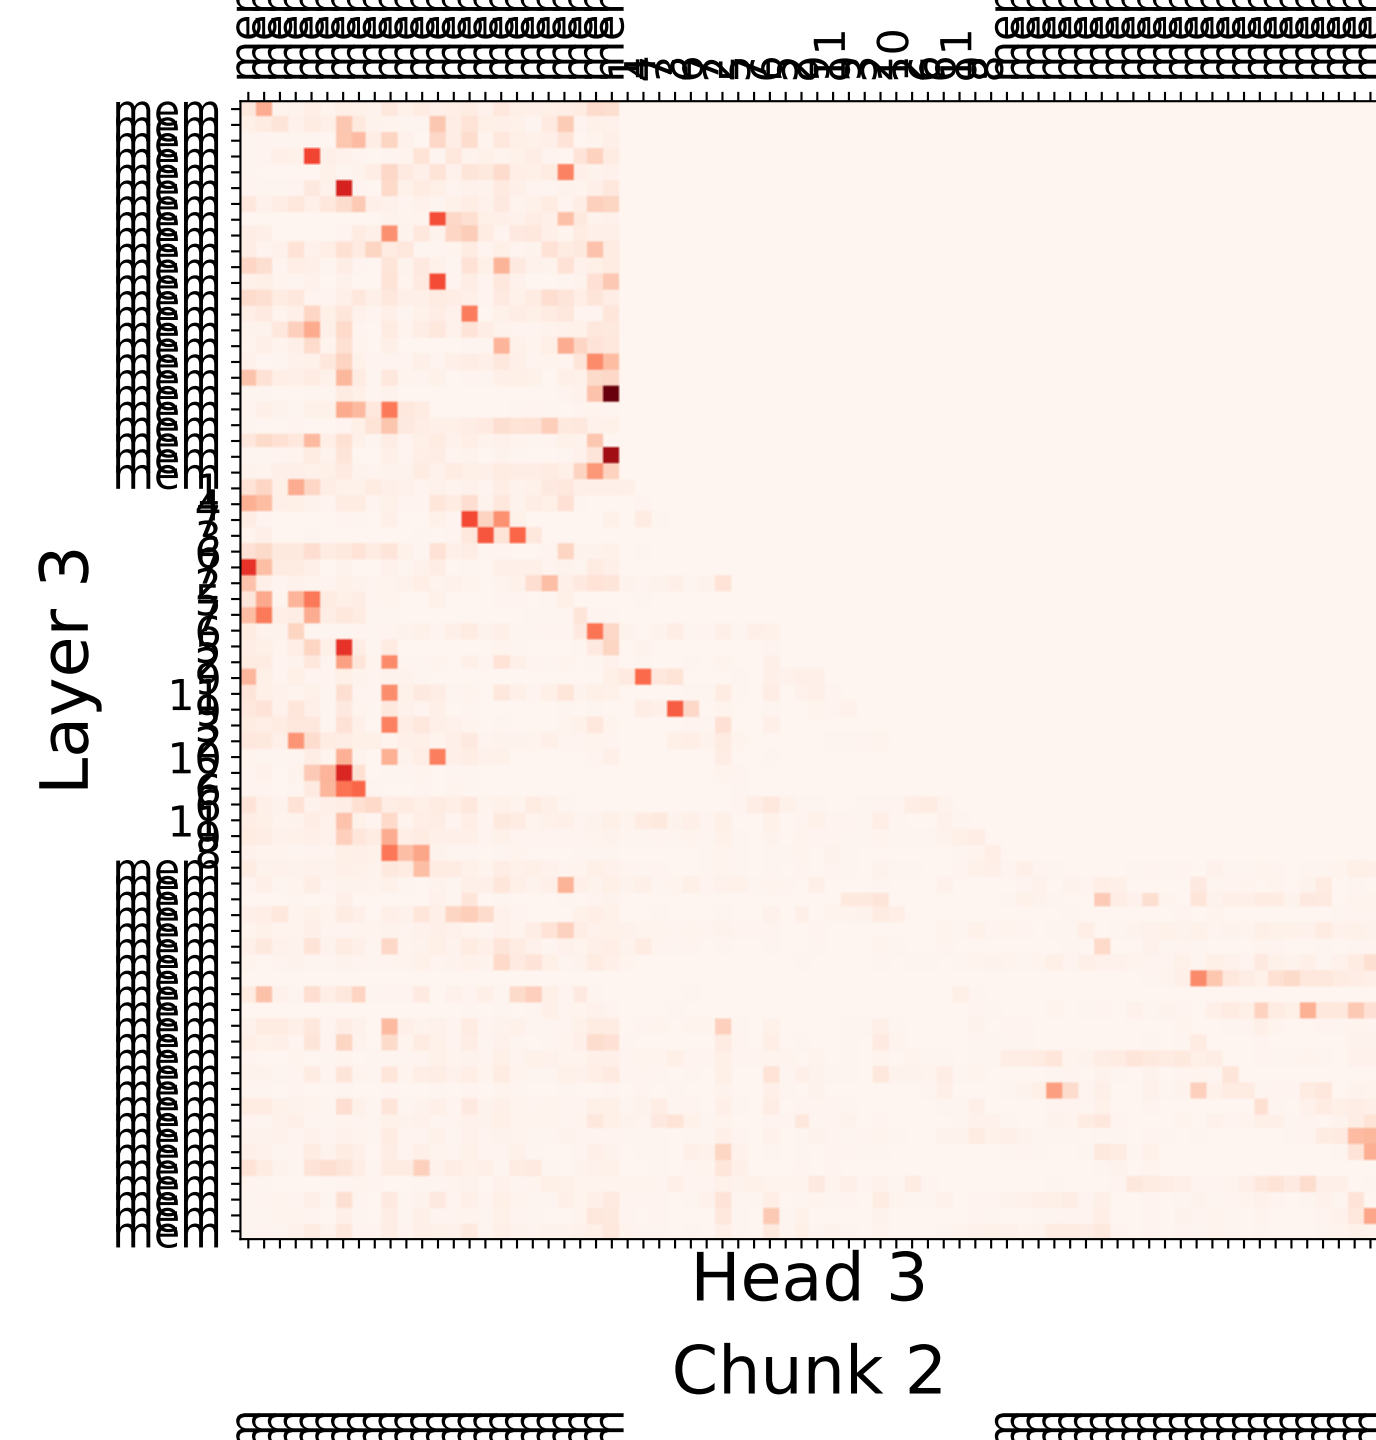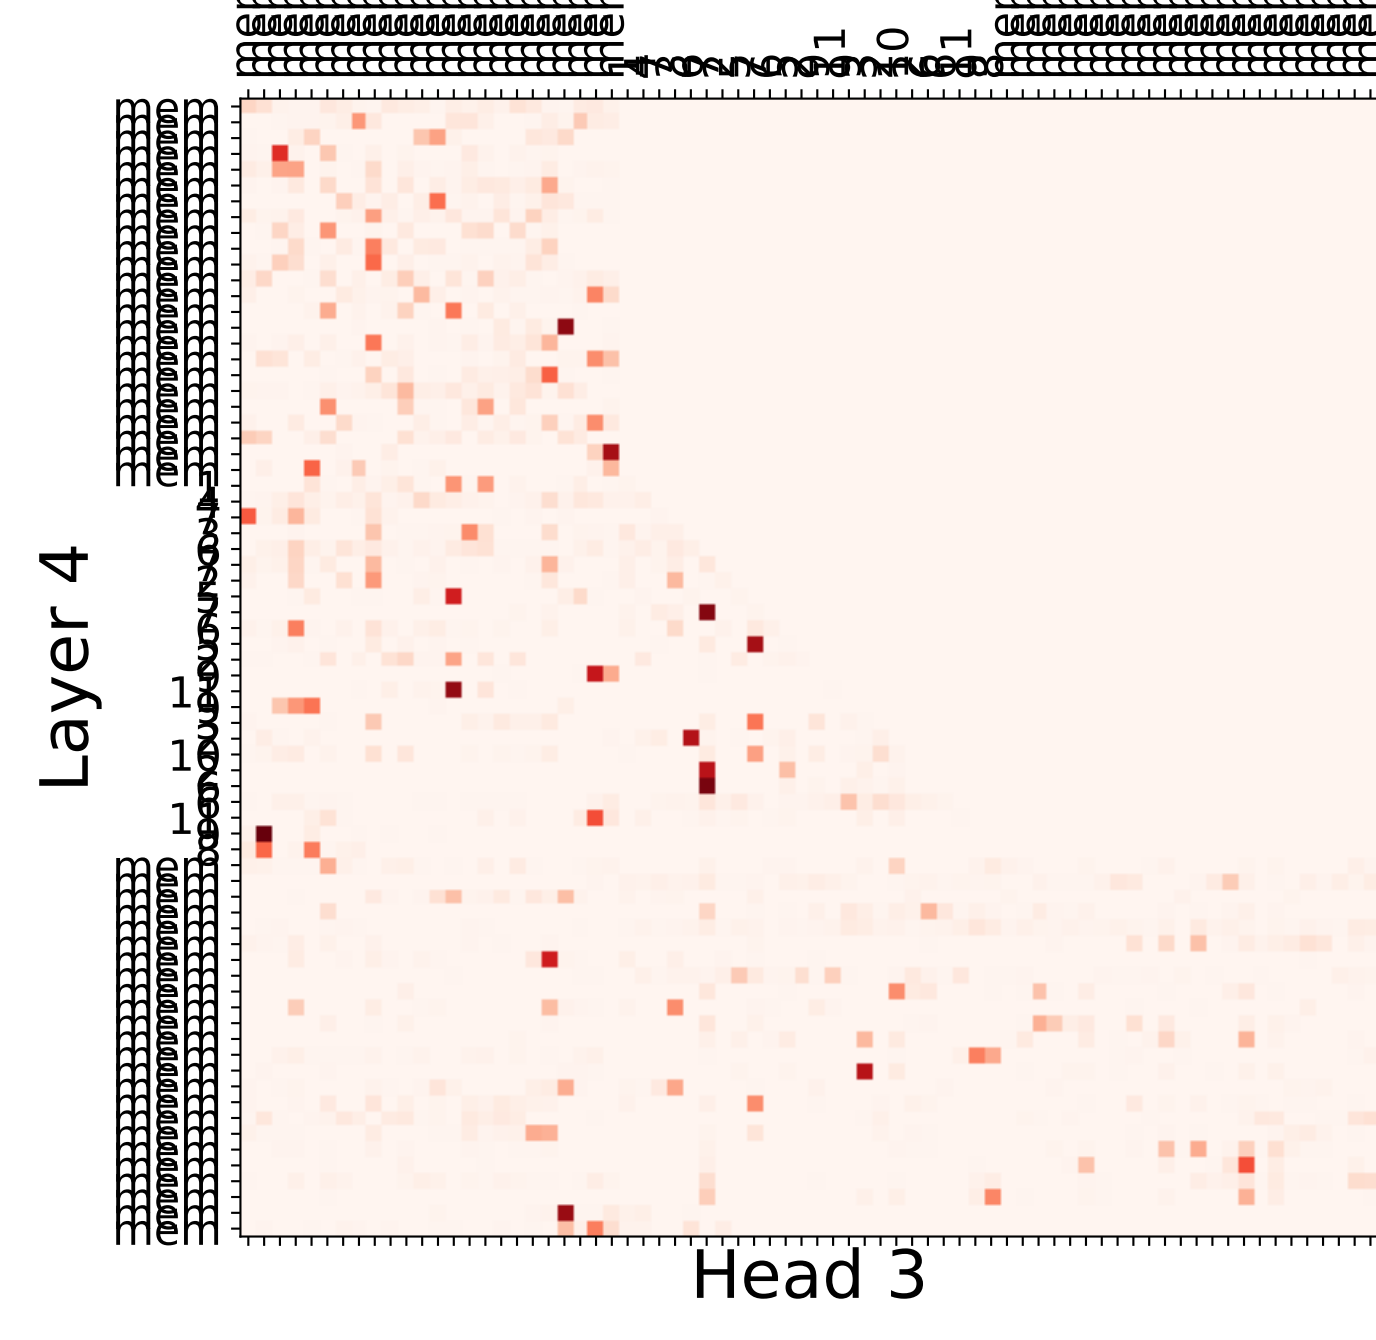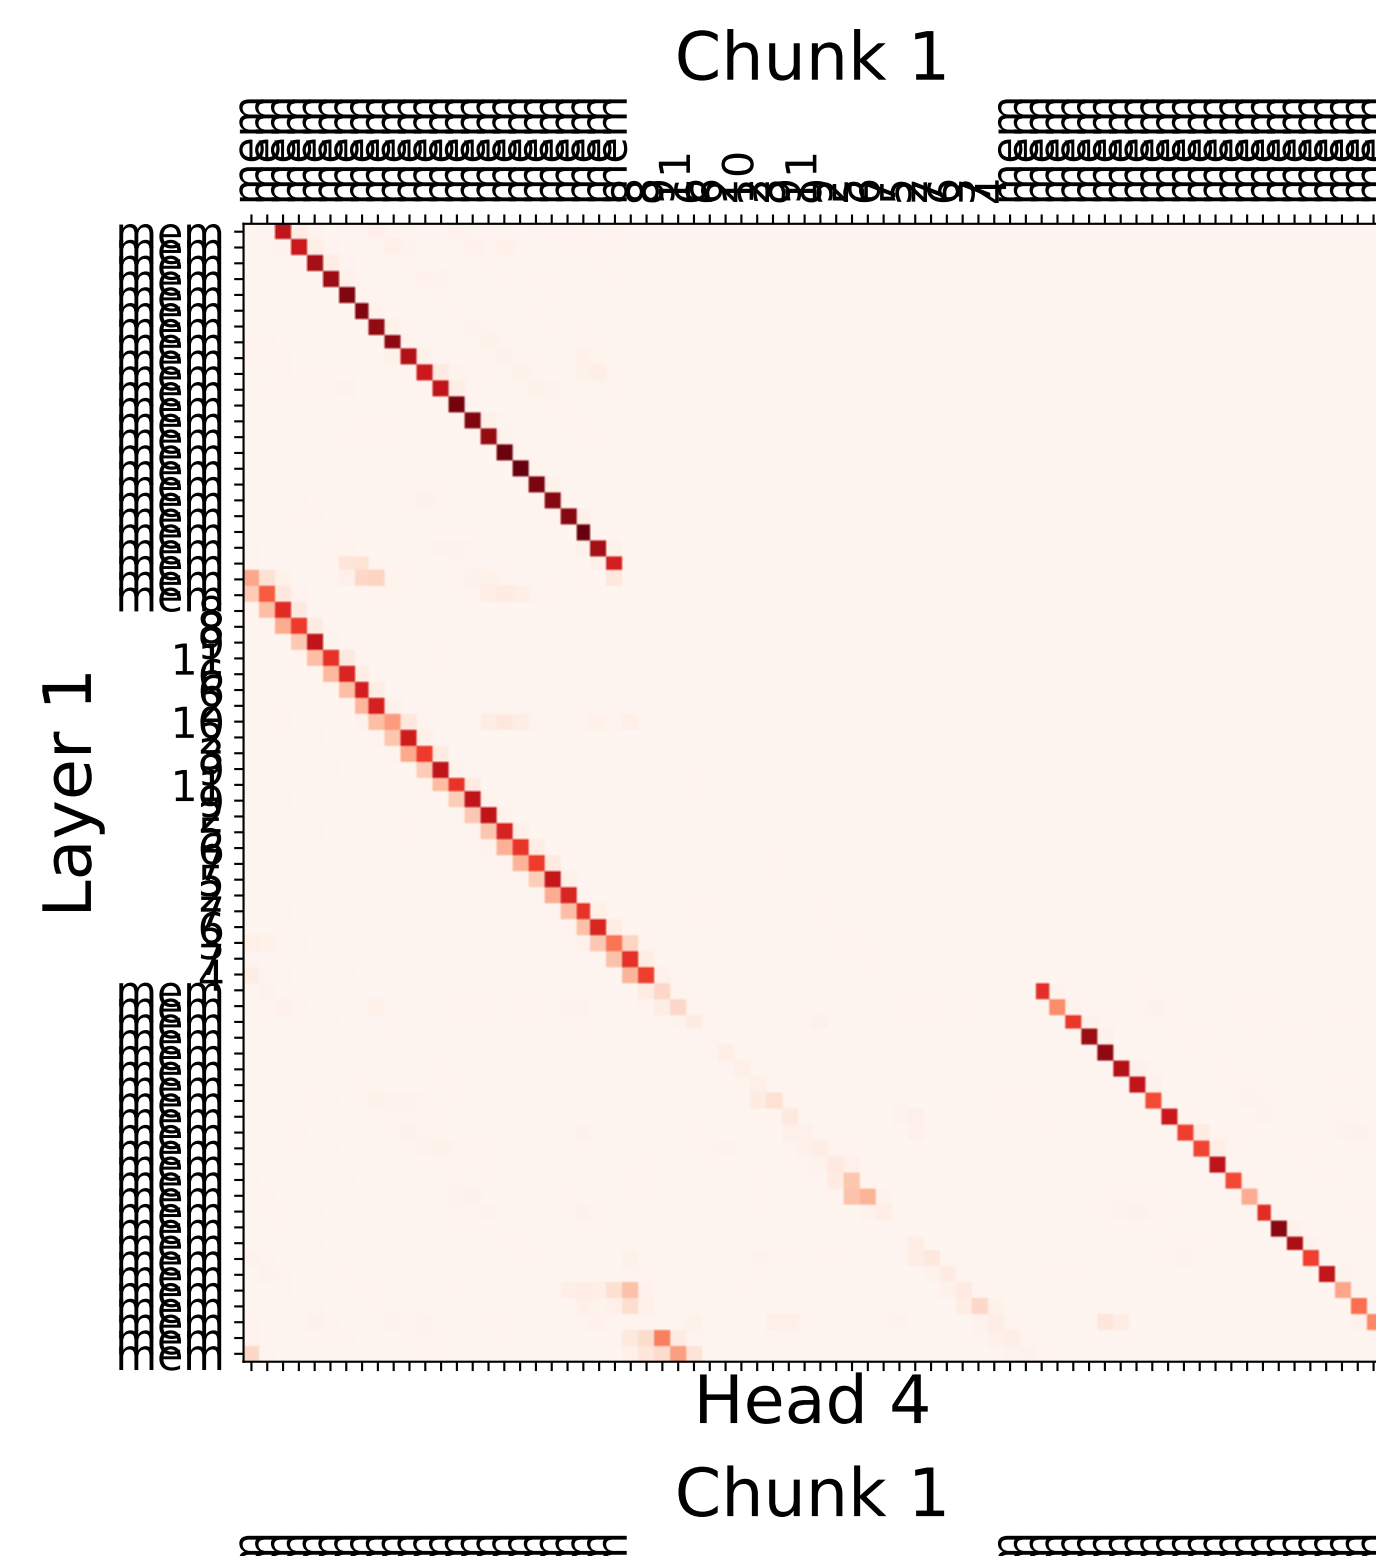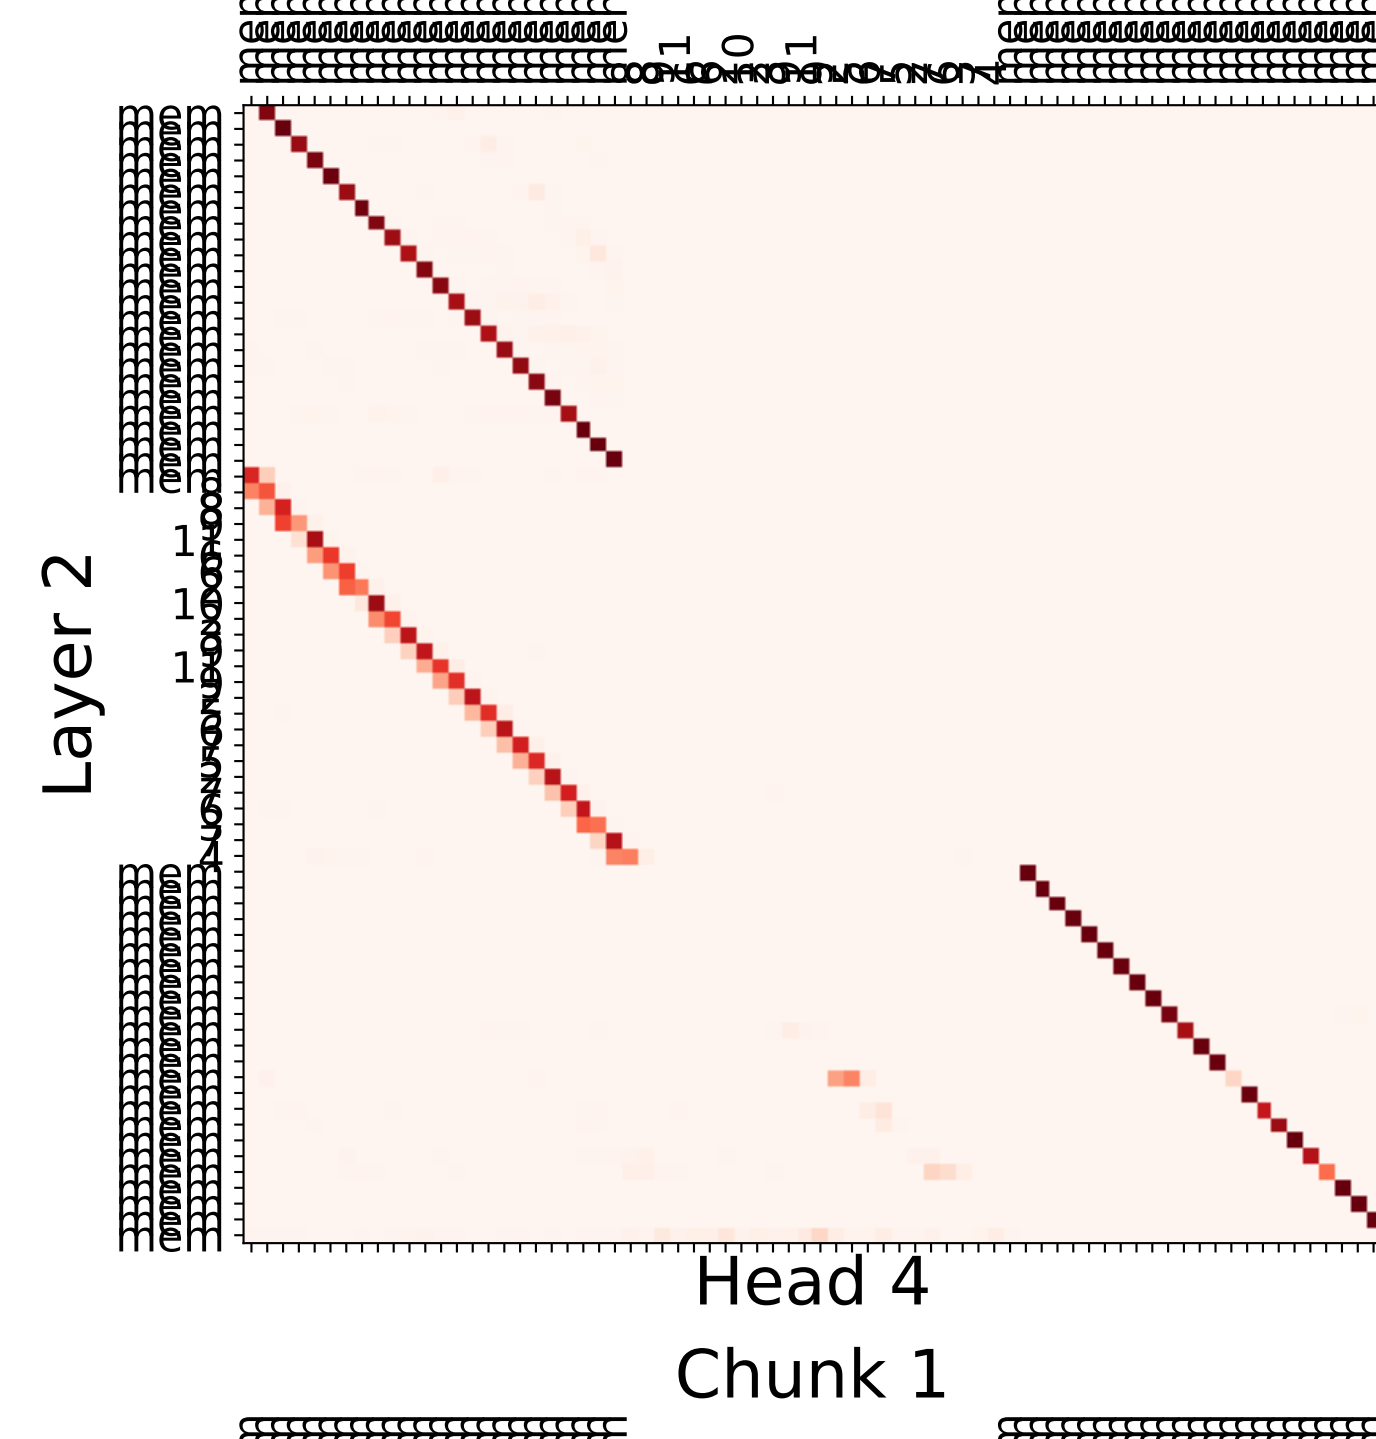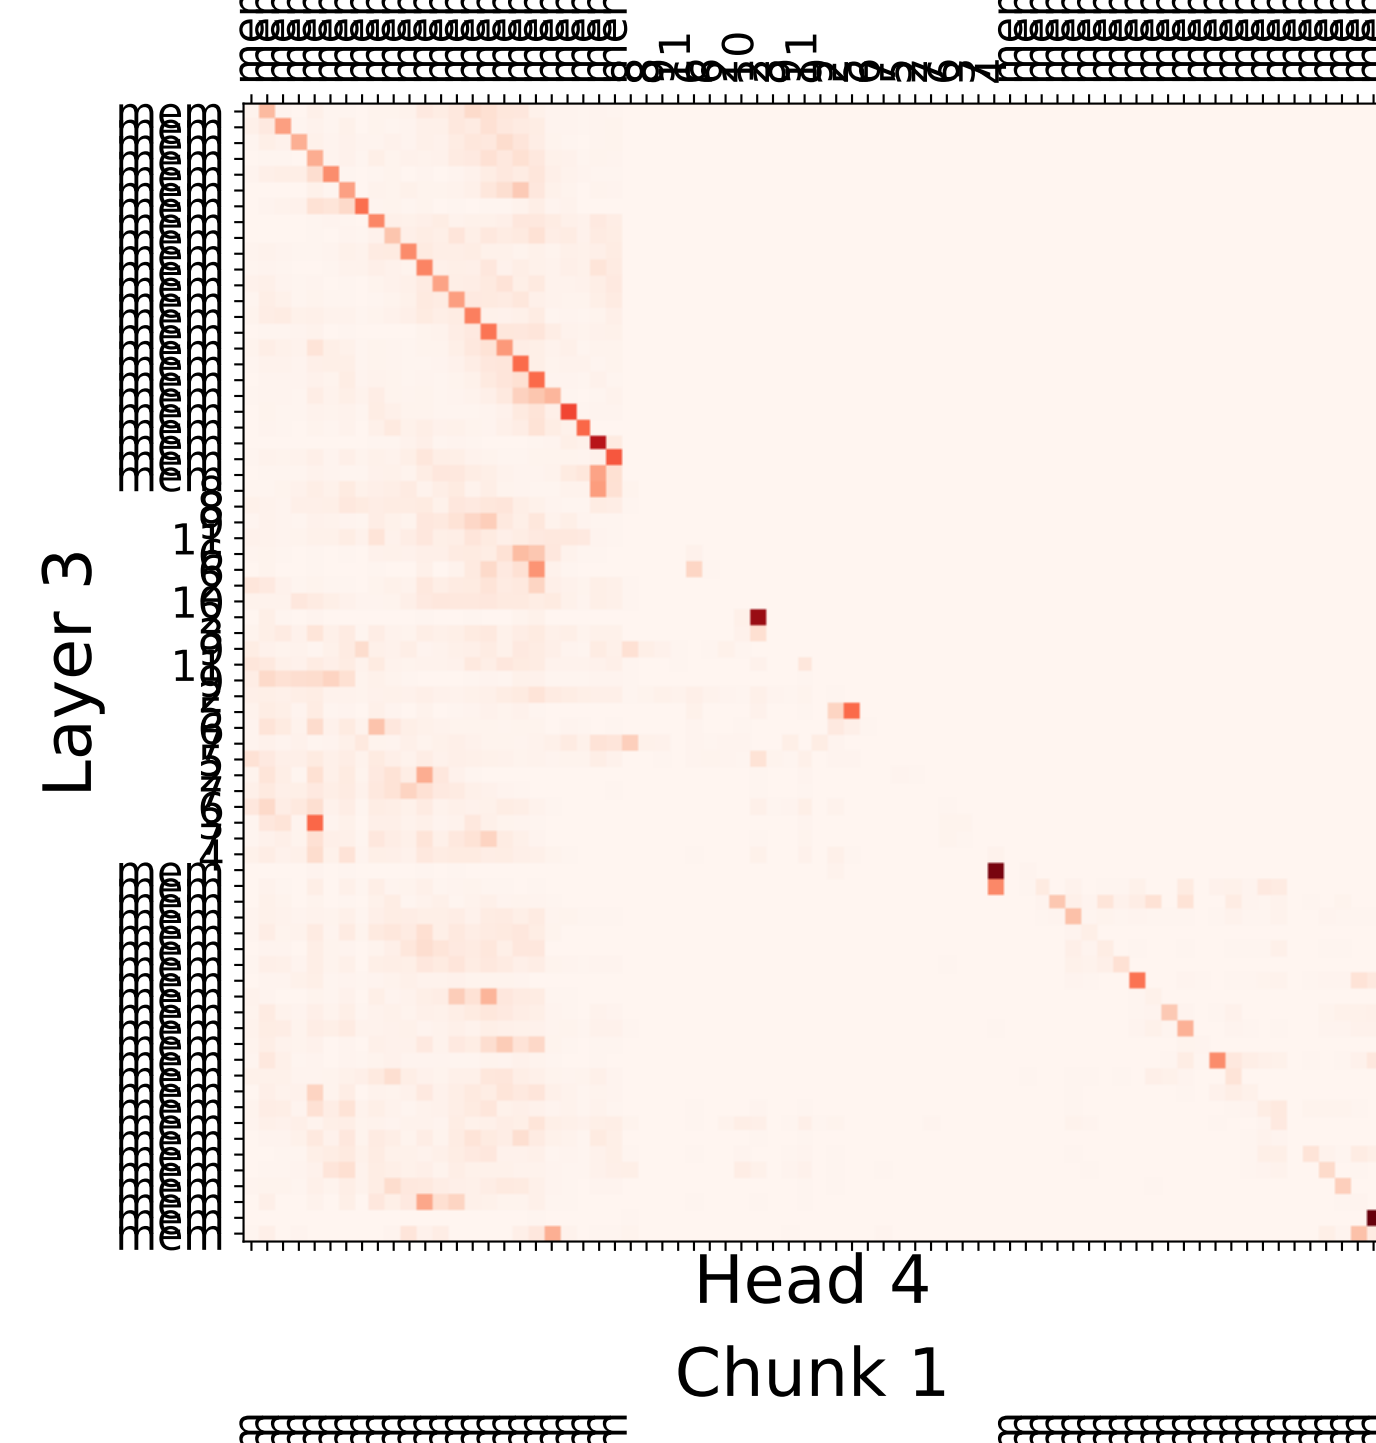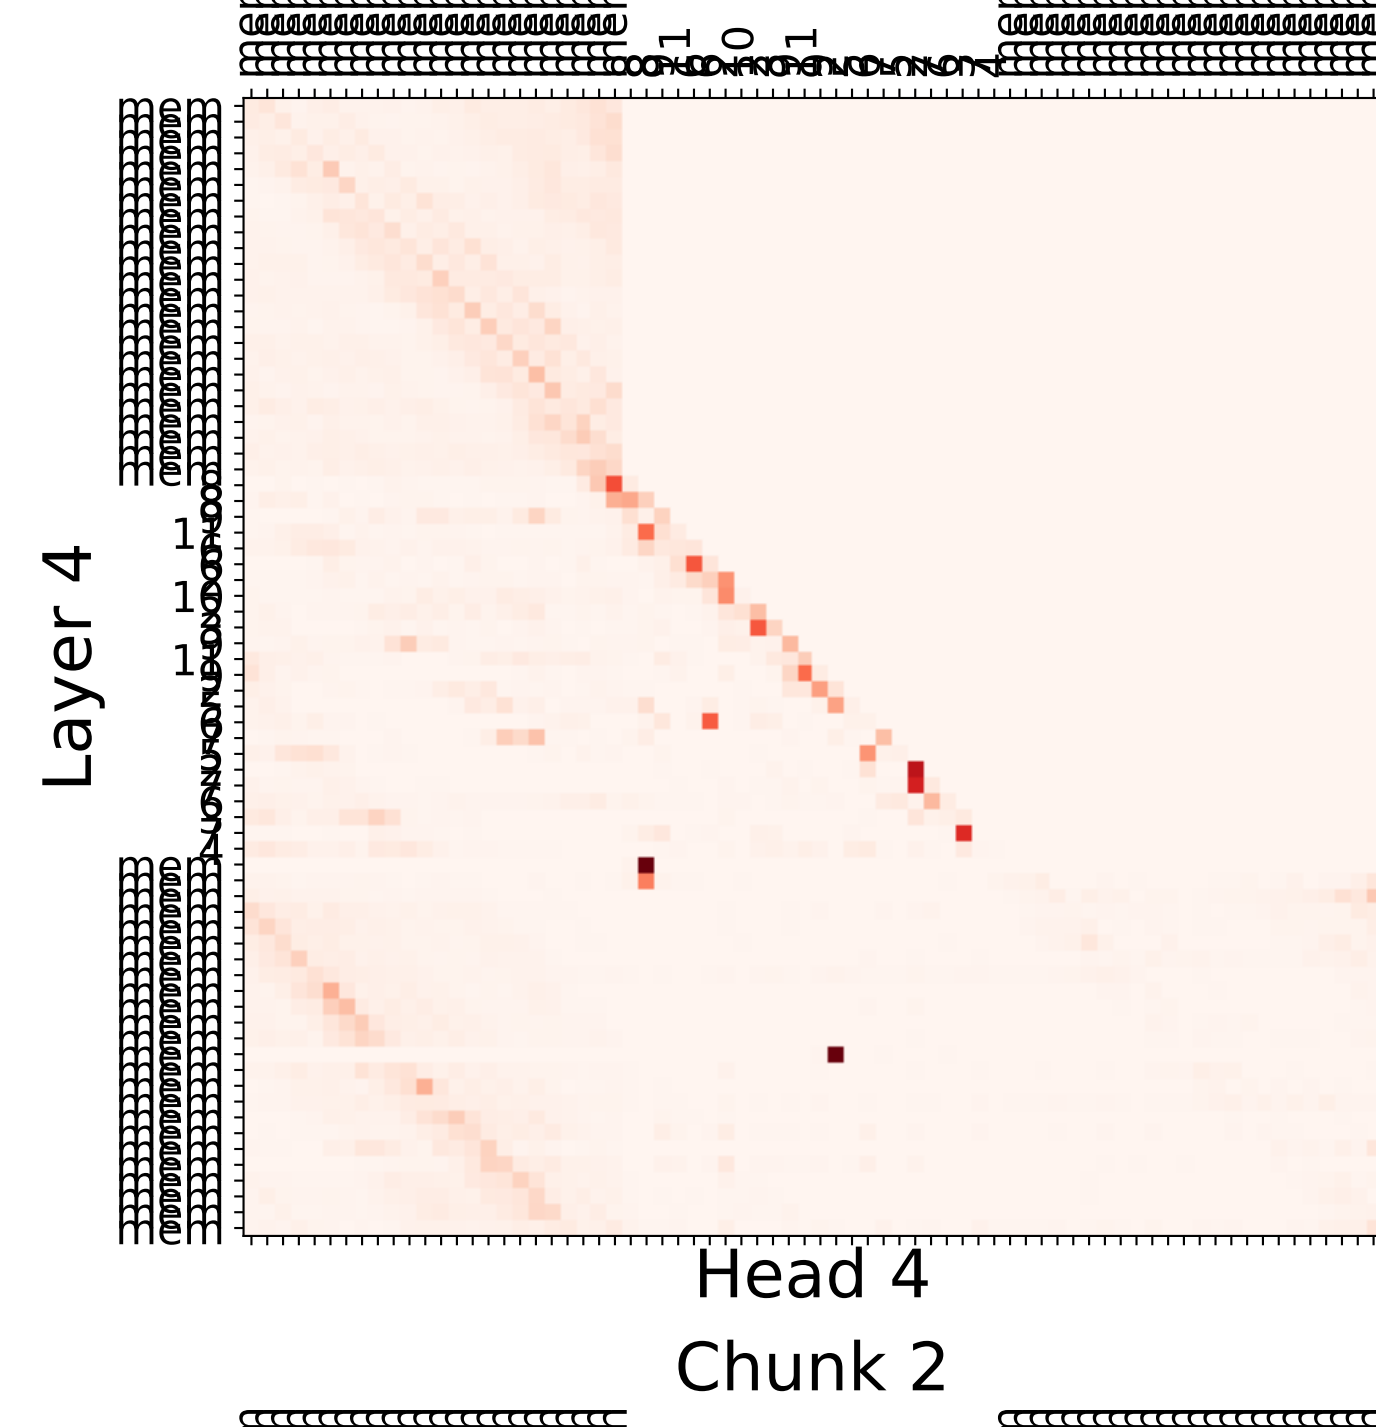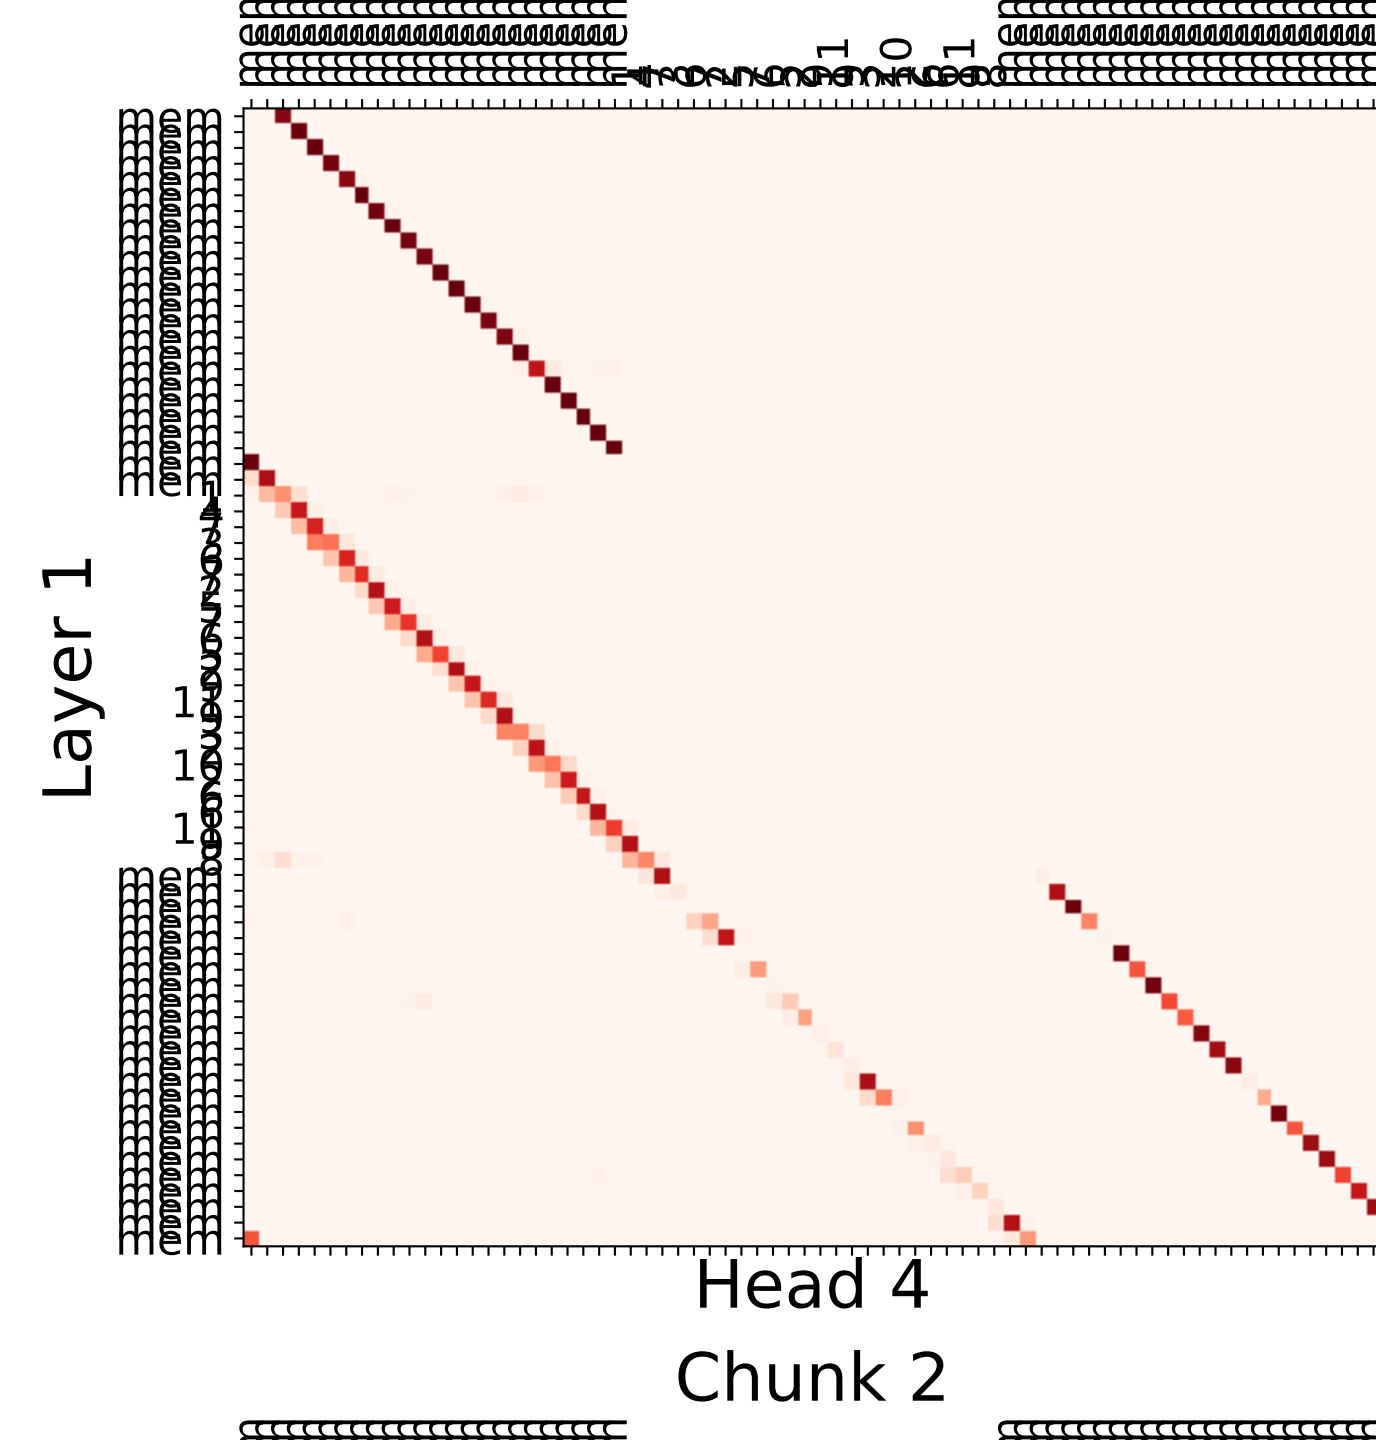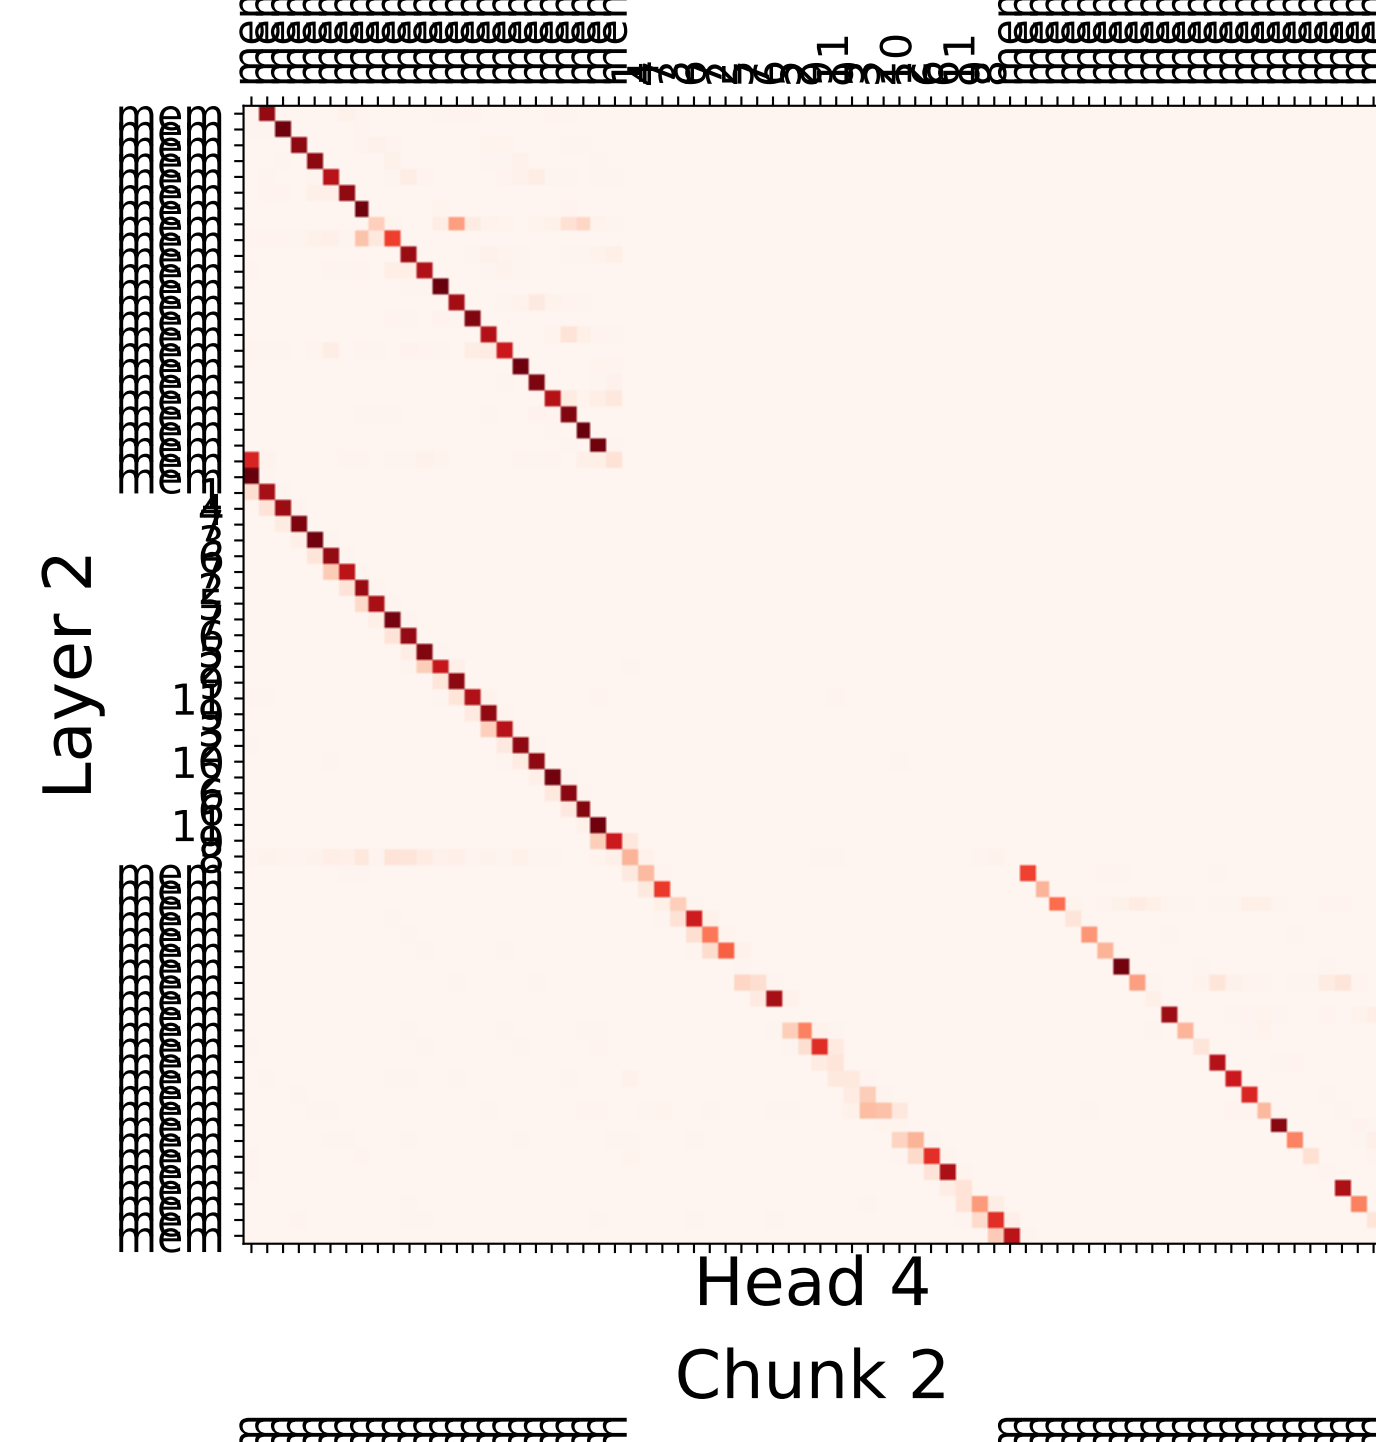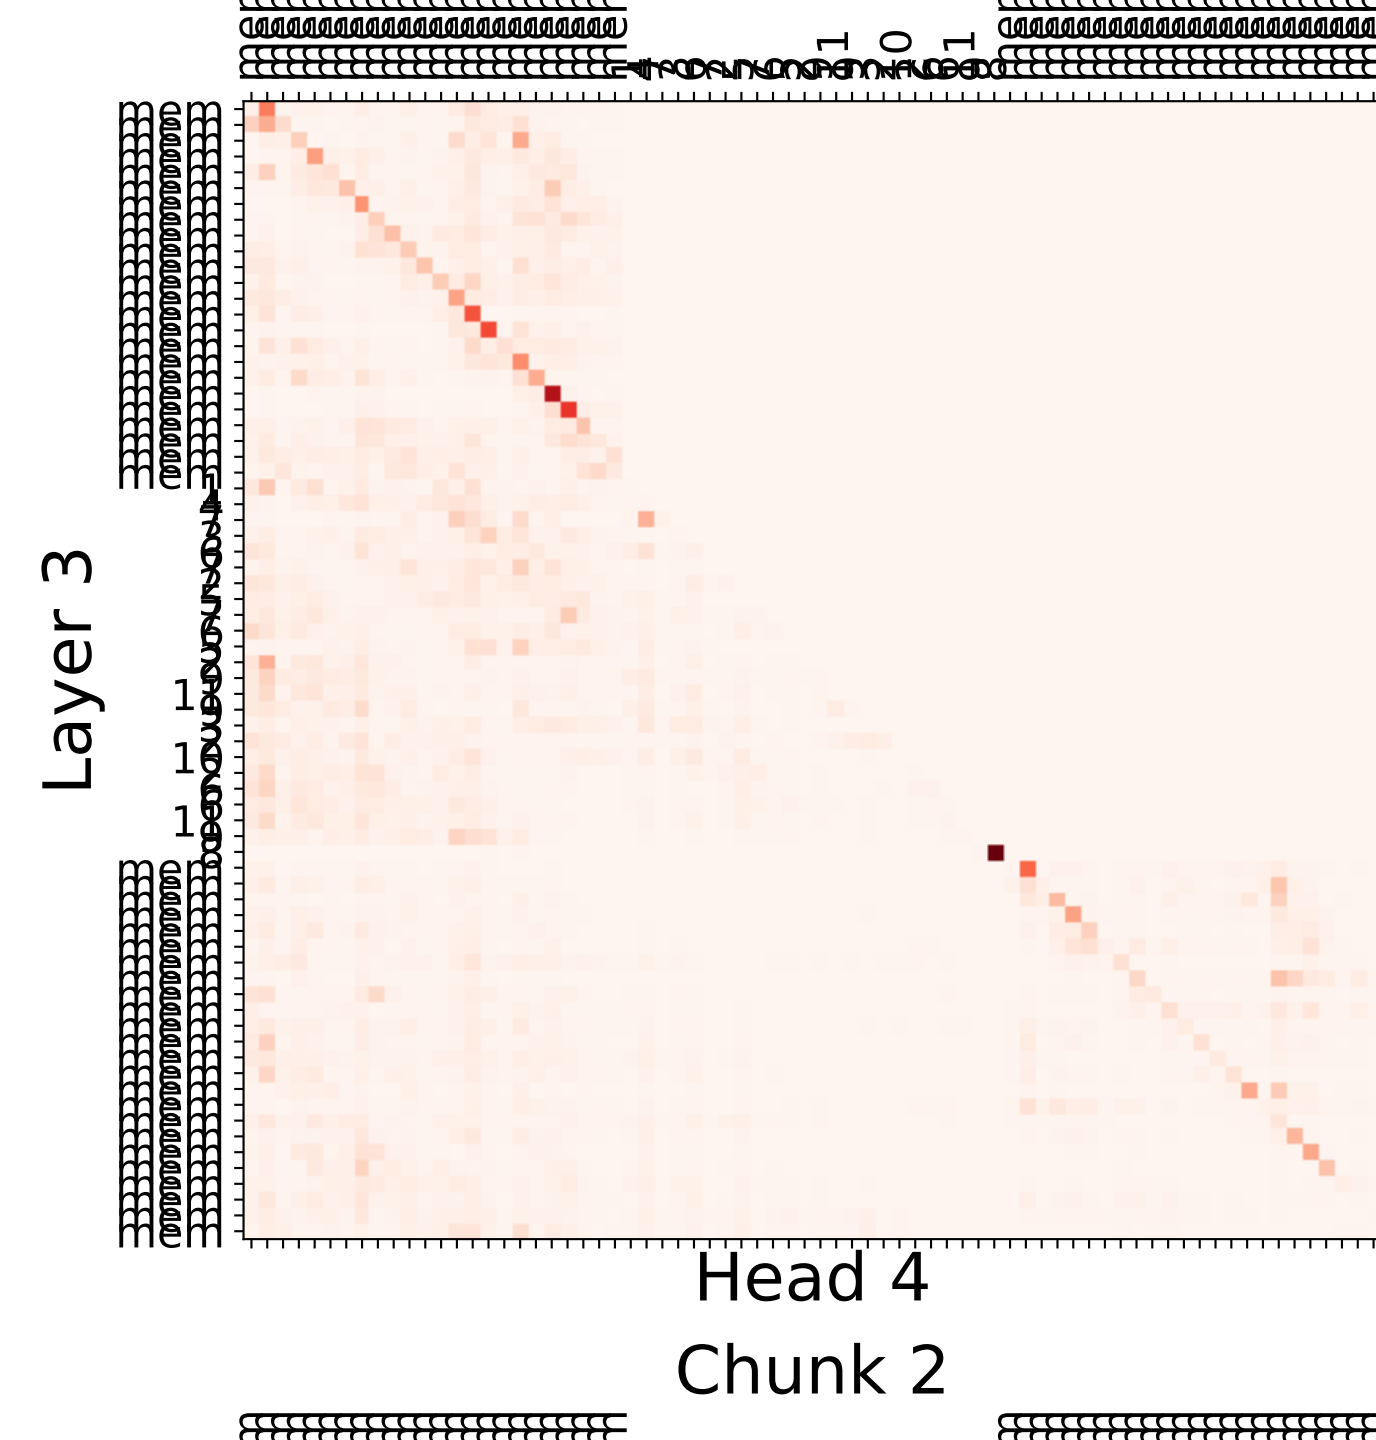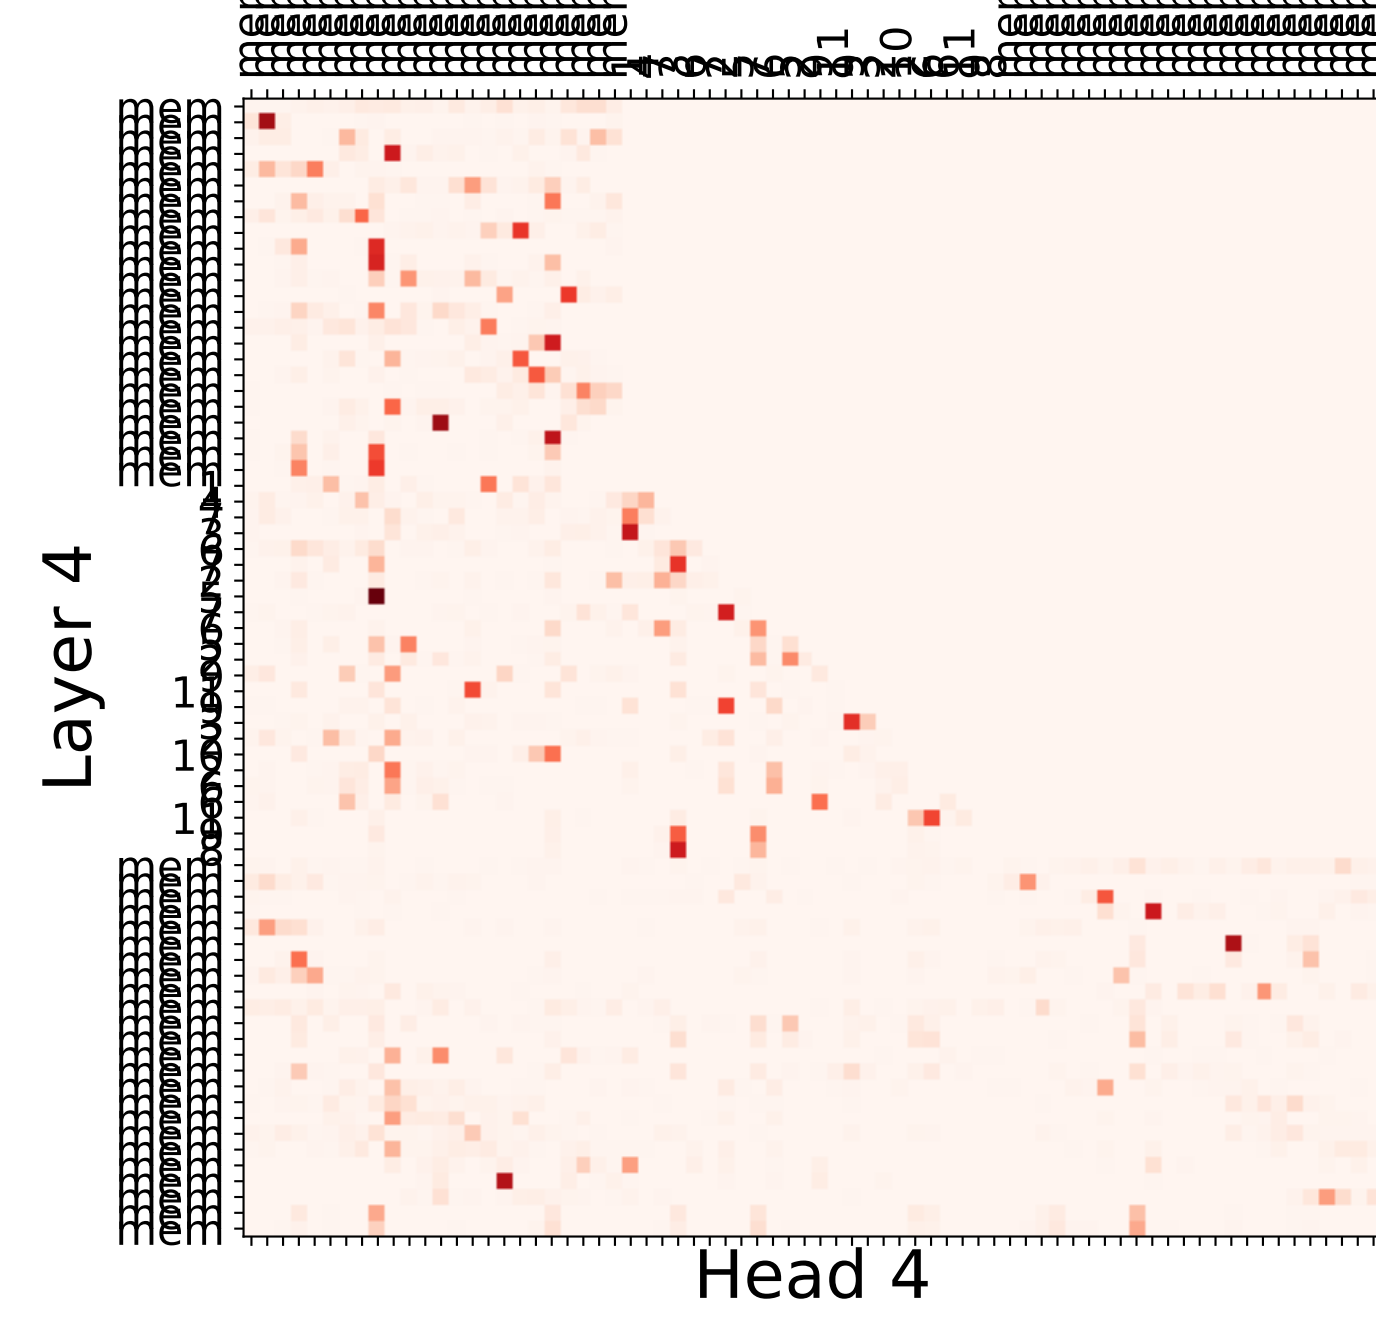

Supplement: Supplementary file 1 [file 47e288629a6996a17ce50b90a056a0e1-Supplemental-Conference.zip › RMT_supp/attention_maps/reverse_tl24mt24_v2.pdf]
